# Supplementary material
Source: publisher site journal article supplement (doi:10.18632/aging.206365)
Supplement: Supplementary file 1 [file aging-v18i1-206365-supplementary-material-SD1.xlsx]

## Sheet: DeSEQ2 WT VS. KO
Supplementary File 1. RNAseqencing DeSEQ2 data comparing WT vs. ATF5 KO young mice. Significant DEG’S (padj<0.05), with respective gene ontology classifications for Upregulated genes.
GeneID	Chr.Start.End	GeneName	GeneType	MGI_ID	Tag	Level	baseMean	log2FoldChange	lfcSE	stat	pvalue	padj	101_WT_CON	103_WT_CON	111_WT_CON	201_KO_CON	205_KO_CON	209_KO_CON
ENSMUSG00000038539.16	chr7:44461680-44466082	Atf5	protein_coding	MGI:2141857	NA	2	911.635	-7.08545	0.332941	-21.2814	1.68876e-100	1.99307e-96	26.2767	21.3471	18.1226	0.12326	0.143739	0.218285
ENSMUSG00000031626.19	chr8:45960825-46280943	Sorbs2	protein_coding	MGI:1924574	NA	2	1976.87	-1.44011	0.135524	-10.6262	2.2502e-26	1.32784e-22	12.2158	5.08451	6.62173	2.40968	2.34915	3.72098
ENSMUSG00000024197.11	chr17:56584476-56599873	Plin3	protein_coding	MGI:1914155	NA	2	990.553	1.12715	0.111192	10.1369	3.78795e-24	1.49018e-20	3.98448	6.05534	6.82242	12.4472	12.76	11.064
ENSMUSG00000013275.10	chr1:131755231-131776603	Slc41a1	protein_coding	MGI:2444823	NA	2	2677.14	0.825292	0.0952674	8.6629	4.59922e-18	1.357e-14	14.9057	14.3829	14.3644	26.6645	26.3465	24.4494
ENSMUSG00000019787.10	chr10:32956550-33352705	Trdn	protein_coding	MGI:1924007	overlapping_locus	2	39960.8	-0.547687	0.0642625	-8.52266	1.5593e-17	3.68058e-14	238.93	216.292	198.312	142.59	148.738	154.68
ENSMUSG00000036745.16	chr3:146558122-146689764	Ttll7	protein_coding	MGI:1918142	NA	2	4528.81	-1.01619	0.121987	-8.33029	8.06431e-17	1.58625e-13	40.4316	21.0394	21.5068	10.0929	10.4608	20.8173
ENSMUSG00000018893.16	chr15:76899687-76934870	Mb	protein_coding	MGI:96922	NA	2	103865	0.837362	0.102013	8.20842	2.24117e-16	3.77862e-13	1741.52	2295.8	1451.5	4045.47	3621.35	2256.63
ENSMUSG00000021770.12	chr14:21800599-21848794	Samd8	protein_coding	MGI:1914880	NA	2	1763.39	-0.57083	0.0702678	-8.12363	4.5245e-16	6.67478e-13	12.0114	12.0033	9.37727	7.86366	8.09097	6.47549
ENSMUSG00000066705.8	chr9:45281483-45307457	Fxyd6	protein_coding	MGI:1890226	NA	2	2292.96	1.60531	0.20174	7.95732	1.75807e-15	2.30541e-12	3.26767	7.8064	22.0121	29.0199	22.4918	23.9774
ENSMUSG00000022594.15	chr15:74619701-74624895	Lynx1	protein_coding	MGI:1345180	NA	2	4495.86	0.722102	0.0913642	7.90356	2.71053e-15	3.19897e-12	35.5852	28.1976	28.5433	47.6401	48.5632	55.6094
ENSMUSG00000101304.2	chr9:50400095-50419123	Plet1os	lncRNA	MGI:1916881	NA	2	152.162	2.03977	0.260551	7.82866	4.93108e-15	5.2906e-12	0.851003	1.64224	3.79695	8.87918	7.90697	5.21652
ENSMUSG00000022747.18	chr16:58288488-58344606	St3gal6	protein_coding	MGI:1888707	NA	1	3510.58	-0.686112	0.0884252	-7.75924	8.544e-15	8.40303e-12	29.619	30.6367	26.4302	18.486	19.556	15.8683
ENSMUSG00000046598.16	chr16:31241098-31277719	Bdh1	protein_coding	MGI:1919161	NA	2	1355.26	2.52293	0.329602	7.65445	1.94135e-14	1.76245e-11	2.40879	2.67037	13.1465	27.0876	26.808	26.4117
ENSMUSG00000021815.5	chr14:20532935-20546969	Mss51	protein_coding	MGI:1922093	NA	2	7669.93	-1.97711	0.259169	-7.62865	2.3723e-14	1.99985e-11	251.212	134.365	245.854	43.9923	20.0527	139.274
ENSMUSG00000085795.9	chr8:27467353-27471489	Zfp703	protein_coding	MGI:2662729	NA	2	1178.76	1.17933	0.156422	7.5394	4.7214e-14	3.7148e-11	4.81915	5.65576	10.3384	12.1066	15.0023	18.1298
ENSMUSG00000009863.15	chr4:140688514-140706504	Sdhb	protein_coding	MGI:1914930	NA	2	11380.1	0.514691	0.0701881	7.33303	2.25012e-13	1.65974e-10	127.156	166.275	168.518	239.952	244.063	177.828
ENSMUSG00000053192.10	chr3:95126446-95139482	Mllt11	protein_coding	MGI:1929671	NA	2	2280.28	-0.750495	0.102809	-7.29989	2.87996e-13	1.99937e-10	64.7948	45.946	29.0442	27.0549	25.7043	26.1886
ENSMUSG00000028132.16	chr3:120995410-121076747	Tlcd4	protein_coding	MGI:1923195	NA	2	1990.25	-0.851828	0.117449	-7.25276	4.08369e-13	2.67754e-10	12.6592	11.8234	12.4208	7.40434	6.93206	6.2076
ENSMUSG00000068823.11	chr3:102927742-102965502	Csde1	protein_coding	MGI:92356	NA	2	30410.8	-0.320254	0.0443377	-7.22306	5.0832e-13	3.15747e-10	256.142	257.417	228.076	207.471	199.12	187.005
ENSMUSG00000039126.11	chr19:16933482-17201296	Prune2	protein_coding	MGI:1925004	NA	2	993.422	2.13608	0.300135	7.11706	1.10252e-12	6.50596e-10	2.6401	1.61376	0.168884	5.40693	4.33699	3.10722
ENSMUSG00000079022.11	chr15:71667644-71906076	Col22a1	protein_coding	MGI:1916950	NA	2	580.252	-0.955804	0.134892	-7.08571	1.38337e-12	7.77452e-10	2.34088	3.13868	3.49825	1.23234	1.53376	1.83347
ENSMUSG00000021622.4	chr13:92001506-92025004	Ckmt2	protein_coding	MGI:1923972	NA	2	34524.4	0.977696	0.139152	7.02613	2.12346e-12	1.13914e-09	599.317	630.895	591.363	1342	1198.34	1058.52
ENSMUSG00000032503.19	chr9:111894159-112065006	Arpp21	protein_coding	MGI:107562	ncRNA_host	1	335.279	1.48415	0.211607	7.01371	2.32077e-12	1.19086e-09	0.280291	0.579192	1.0003	1.16475	1.25724	2.46453
ENSMUSG00000022186.15	chr15:4055865-4184826	Oxct1	protein_coding	MGI:1914291	NA	2	13058.2	0.681354	0.09847	6.91941	4.53538e-12	2.23027e-09	86.6728	95.3727	134.398	164.878	165.025	169.999
ENSMUSG00000028161.18	chr3:136375885-136643488	Ppp3ca	protein_coding	MGI:107164	NA	2	7232.63	-0.511221	0.0742599	-6.88422	5.81066e-12	2.7431e-09	51.3212	67.259	55.3493	44.8836	47.4561	30.9912
ENSMUSG00000030451.17	chr7:55699944-55881548	Herc2	protein_coding	MGI:103234	NA	2	4840.48	-0.834214	0.121385	-6.87244	6.31123e-12	2.86481e-09	13.8522	12.3977	15.5878	7.93179	7.80201	7.70647
ENSMUSG00000026393.11	chr1:138410613-138547879	Nek7	protein_coding	MGI:1890645	overlapping_locus	2	5155.9	-0.519077	0.0757127	-6.85587	7.08796e-12	3.09823e-09	44.3661	42.3542	34.0674	28.8597	29.8289	25.2565
ENSMUSG00000026664.8	chr2:4923830-4943541	Phyh	protein_coding	MGI:891978	NA	2	5250.3	0.654527	0.0959291	6.82303	8.91405e-12	3.75727e-09	81.6619	79.3513	82.3586	128.041	140.505	116.139
ENSMUSG00000052276.9	chr16:27126239-27169962	Ostn	protein_coding	MGI:2677164	NA	2	1088.56	-1.76717	0.260945	-6.77218	1.2686e-11	5.16276e-09	12.6929	25.2818	81.2261	4.4597	8.07089	16.9457
ENSMUSG00000018909.16	chr7:99184673-99255978	Arrb1	protein_coding	MGI:99473	ncRNA_host	2	686.093	-0.886478	0.134271	-6.60217	4.05175e-11	1.59396e-08	4.08947	4.88714	4.44587	2.87006	2.6782	1.8337
ENSMUSG00000020570.16	chr12:33003890-33029859	Sypl	protein_coding	MGI:108081	NA	2	4831.22	-0.541653	0.0848273	-6.38537	1.70986e-10	6.5096e-08	38.6872	34.9182	34.1496	25.3482	26.5798	22.1663
ENSMUSG00000001666.9	chr10:75607064-75609248	Ddt	protein_coding	MGI:1298381	overlapping_locus	2	294.918	0.923011	0.147486	6.25831	3.89179e-10	1.43534e-07	7.31004	7.76619	15.5883	16.4195	17.5865	21.5471
ENSMUSG00000044308.18	chr2:69727590-69854357	Ubr3	protein_coding	MGI:1861100	NA	2	14585.5	-0.443037	0.0709251	-6.24655	4.19611e-10	1.50068e-07	70.5834	62.9231	55.9727	45.7369	46.1959	46.8275
ENSMUSG00000030554.17	chr7:67379908-67409490	Synm	protein_coding	MGI:2661187	NA	2	33967	-0.575187	0.092316	-6.23064	4.64548e-10	1.58364e-07	219.401	176.207	150.975	116.961	108.748	139.015
ENSMUSG00000021816.12	chr14:20549432-20596641	Ppp3cb	protein_coding	MGI:107163	NA	2	7764.39	-0.463504	0.0744115	-6.22893	4.69644e-10	1.58364e-07	77.4081	67.9899	60.5728	48.9706	53.8929	45.9427
ENSMUSG00000030465.20	chr8:68141734-68664679	Psd3	protein_coding	MGI:1918215	NA	1	1090.24	-0.717336	0.116328	-6.16652	6.98093e-10	2.28858e-07	4.3056	3.31931	2.38186	1.81284	1.70438	2.50677
ENSMUSG00000022623.18	chr15:89383826-89444464	Shank3	protein_coding	MGI:1930016	NA	2	951.433	0.687952	0.111774	6.15483	7.51562e-10	2.39728e-07	2.26697	2.50574	2.86353	3.86112	4.28595	4.07104
ENSMUSG00000030057.16	chr6:87819597-87828088	Cnbp	protein_coding	MGI:88431	NA	2	10617.8	-0.456254	0.0743493	-6.13663	8.42897e-10	2.59585e-07	217.769	206.888	168.077	136.626	142.84	150.451
ENSMUSG00000066324.3	chr4:4762484-4793355	Bpnt2	protein_coding	MGI:1915720	NA	2	3165.53	-0.50216	0.0818672	-6.13384	8.57804e-10	2.59585e-07	22.9707	20.8168	18.7373	15.4811	14.2652	14.2858
ENSMUSG00000034659.15	chr19:10848024-10859365	Tmem109	protein_coding	MGI:1915789	NA	1	6937.35	-0.528498	0.0867011	-6.09563	1.09009e-09	3.2163e-07	97.5963	87.9457	98.7682	61.6613	67.9465	67.4642
ENSMUSG00000024451.10	chr18:38105681-38132022	Arap3	protein_coding	MGI:2147274	ncRNA_host	2	600.848	0.8286	0.136285	6.07991	1.20248e-09	3.46137e-07	2.42126	2.82984	2.75371	4.68702	4.78337	4.68198
ENSMUSG00000044951.18	chr13:32884810-32967937	Mylk4	protein_coding	MGI:3643758	NA	2	39694.9	-0.867948	0.143947	-6.02963	1.64337e-09	4.61788e-07	317.518	173.603	217.819	114.463	94.9688	180.146
ENSMUSG00000038485.7	chr11:97253261-97289368	Socs7	protein_coding	MGI:2651588	NA	2	3482.47	-0.315185	0.0524297	-6.01157	1.83739e-09	5.04301e-07	21.224	20.4278	17.3174	16.386	16.4739	14.4321
ENSMUSG00000039100.11	chr15:31456037-31531199	Marchf6	protein_coding	MGI:2442773	overlapping_locus	2	7844.62	-0.361674	0.0604646	-5.98159	2.20977e-09	5.92719e-07	48.1615	47.6411	47.1854	38.2337	37.3066	35.8178
ENSMUSG00000027236.9	chr2:121859027-121887079	Eif3j1	protein_coding	MGI:1925905	ncRNA_host	2	1898.06	-0.467618	0.0786659	-5.94436	2.77546e-09	7.27911e-07	14.7203	14.3489	12.6873	10.1901	10.1893	9.79139
ENSMUSG00000021215.16	chr13:3932018-3968220	Net1	protein_coding	MGI:1927138	NA	2	969.743	-0.710848	0.1199	-5.92865	3.05441e-09	7.64149e-07	10.913	9.0156	8.58206	5.15649	5.56576	6.68802
ENSMUSG00000042251.13	chr1:131725119-131749211	Pm20d1	protein_coding	MGI:2442939	NA	2	75.3295	2.75399	0.464714	5.9262	3.10031e-09	7.64149e-07	0.028715	0.0742776	0.316529	0.763164	0.796699	0.649964
ENSMUSG00000029591.15	chr5:114268447-114277384	Ung	protein_coding	MGI:109352	NA	2	448.137	1.22763	0.20727	5.92286	3.16382e-09	7.64149e-07	2.81165	3.52626	5.70735	9.25444	10.2608	8.07743
ENSMUSG00000032601.14	chr9:108566513-108627635	Prkar2a	protein_coding	MGI:108025	NA	1	7669.11	-0.329483	0.0556333	-5.92241	3.17262e-09	7.64149e-07	65.3543	61.5722	52.6321	47.5734	49.8522	44.9581
ENSMUSG00000020722.6	chr11:107594044-107607348	Cacng1	protein_coding	MGI:1206582	NA	2	4977.27	-0.596889	0.101184	-5.89905	3.65593e-09	8.62945e-07	206.495	145.03	161.806	115.092	108.195	112.903
ENSMUSG00000016319.4	chrX:36059304-36062460	Slc25a5	protein_coding	MGI:1353496	NA	2	999.748	0.64661	0.110533	5.84991	4.91828e-09	1.13815e-06	19.0824	20.5932	22.1011	29.5185	30.1593	37.2142
ENSMUSG00000028766.11	chr4:137469044-137523695	Alpl	protein_coding	MGI:87983	NA	2	1164.73	1.26678	0.217044	5.83648	5.3314e-09	1.21002e-06	4.67869	4.36853	3.64663	10.7408	8.10407	11.6732
ENSMUSG00000031382.15	chrX:163219990-163242166	Asb11	protein_coding	MGI:1916104	NA	2	3675.85	-0.479759	0.0826893	-5.80195	6.55489e-09	1.45964e-06	83.0407	111.665	91.3059	74.3189	85.7614	48.6518
ENSMUSG00000034449.8	chr11:84711682-84719820	Dhrs11	protein_coding	MGI:2652816	NA	2	842.451	0.70609	0.121854	5.79456	6.84994e-09	1.49709e-06	14.5094	13.8674	15.3424	23.9834	27.1476	20.7228
ENSMUSG00000028470.11	chr4:43654227-43656466	Hint2	protein_coding	MGI:1916167	NA	2	463.43	0.663702	0.114733	5.78473	7.2627e-09	1.55844e-06	7.24024	8.27666	11.0546	13.0805	14.425	14.0441
ENSMUSG00000021843.18	chr14:47885905-47977351	Ktn1	protein_coding	MGI:109153	NA	2	9227.26	-0.337001	0.0583913	-5.77143	7.86005e-09	1.65651e-06	46.5723	49.0106	41.4366	38.7224	40.1926	30.1012
ENSMUSG00000027559.6	chr3:14928598-14937583	Car3	protein_coding	MGI:88270	NA	2	73417.1	-0.885759	0.154491	-5.73341	9.84284e-09	2.0258e-06	2164.88	2130.53	1233.37	1097.34	1527.54	519.901
ENSMUSG00000030729.18	chr7:99876601-99928075	Pgm2l1	protein_coding	MGI:1918224	NA	2	975.412	-0.648805	0.1132	-5.73148	9.95565e-09	2.0258e-06	5.41927	4.91397	4.4343	3.06782	2.93295	3.40817
ENSMUSG00000035105.6	chr12:54225767-54250646	Egln3	protein_coding	MGI:1932288	NA	2	2423.61	1.43398	0.252102	5.68809	1.28471e-08	2.56985e-06	7.1073	23.761	26.6487	52.0015	42.6742	43.0864
ENSMUSG00000074994.7	chr2:104585140-104647105	Qser1	protein_coding	MGI:2138986	NA	2	4648.31	-0.466269	0.0824734	-5.65357	1.5715e-08	3.09114e-06	21.4907	20.731	19.5109	14.5712	15.556	14.5179
ENSMUSG00000001173.16	chrX:47001264-47054745	Ocrl	protein_coding	MGI:109589	NA	1	618.855	-0.571059	0.101174	-5.64431	1.65847e-08	3.20874e-06	4.32808	4.42266	4.03105	2.90674	3.13422	2.57382
ENSMUSG00000020392.9	chr11:51858488-51868161	Cdkn2aipnl	protein_coding	MGI:1261797	NA	2	590.083	-0.666905	0.118357	-5.6347	1.75365e-08	3.33816e-06	15.2027	12.5085	13.0814	7.73691	9.09769	8.74466
ENSMUSG00000013033.17	chr8:84626734-84668583	Adgrl1	protein_coding	MGI:1929461	NA	2	1281.56	-0.880622	0.156429	-5.62953	1.80705e-08	3.38162e-06	8.88353	8.00117	4.12632	3.96191	3.97537	3.01425
ENSMUSG00000028572.14	chr4:95855477-95913650	Hook1	protein_coding	MGI:1925213	NA	2	984.465	-0.733035	0.130331	-5.62443	1.86124e-08	3.38162e-06	5.71364	4.84284	5.13707	2.76628	3.40015	3.25389
ENSMUSG00000030433.16	chr7:4943511-4967405	Sbk2	protein_coding	MGI:2685925	NA	2	1357.1	1.80191	0.320378	5.62432	1.86244e-08	3.38162e-06	7.19831	6.48312	7.40265	33.6182	19.9935	20.2226
ENSMUSG00000038855.11	chr1:180158050-180252367	Itpkb	protein_coding	MGI:109235	NA	2	1441.41	0.937584	0.16734	5.60287	2.10835e-08	3.77012e-06	4.02971	6.02119	6.43207	12.8706	9.79059	8.60217
ENSMUSG00000028278.15	chr4:32983037-33022180	Rragd	protein_coding	MGI:1098604	NA	1	7517.33	-0.554269	0.099052	-5.59573	2.19689e-08	3.86981e-06	77.6632	58.4202	61.4889	44.7024	47.2123	42.2356
ENSMUSG00000042717.6	chr6:14713976-14755273	Ppp1r3a	protein_coding	MGI:2153588	NA	2	8828.68	-0.782539	0.140209	-5.58122	2.38832e-08	4.10699e-06	68.873	60.378	49.0089	33.301	38.5763	30.8425
ENSMUSG00000107585.2	chr7:3470181-3471961	3300002P13Rik	lncRNA	MGI:1917480	NA	2	311.38	-1.05745	0.189505	-5.58008	2.40414e-08	4.10699e-06	13.4447	12.7478	14.9108	6.03645	5.77139	8.02473
ENSMUSG00000004897.17	chr3:87813628-87823439	Hdgf	protein_coding	MGI:1194494	NA	2	6917.42	-0.406292	0.072841	-5.57779	2.43594e-08	4.10699e-06	114.346	104.937	98.881	79.607	82.9988	77.1385
ENSMUSG00000020601.9	chr12:15841728-15866923	Trib2	protein_coding	MGI:2145021	ncRNA_host	2	370.86	0.640073	0.114915	5.56995	2.54808e-08	4.20101e-06	3.01434	3.54237	3.11462	5.44961	5.25061	4.39415
ENSMUSG00000021203.16	chr12:103354941-103372609	Otub2	protein_coding	MGI:1915399	NA	1	535.989	-1.23986	0.222638	-5.56894	2.5629e-08	4.20101e-06	13.1869	10.9693	4.45582	4.13934	4.22818	2.99379
ENSMUSG00000002107.19	chr2:6544505-7514374	Celf2	protein_coding	MGI:1338822	ncRNA_host	2	1834.8	-0.532332	0.0956563	-5.56505	2.62072e-08	4.23695e-06	5.13849	5.45403	6.4245	3.58067	4.05474	4.09347
ENSMUSG00000034842.17	chr5:92479686-92562487	Art3	protein_coding	MGI:1202729	overlapping_locus	2	4094.58	-0.484239	0.087603	-5.52765	3.24555e-08	5.17621e-06	44.0624	47.0533	35.745	33.1438	34.9843	23.4165
ENSMUSG00000067336.7	chr1:59802559-59918173	Bmpr2	protein_coding	MGI:1095407	overlapping_locus	2	2841.1	-0.722725	0.130808	-5.5251	3.29303e-08	5.18192e-06	10.0873	10.2625	9.12602	6.12604	5.52594	6.20574
ENSMUSG00000068373.16	chr2:103973418-104241358	D430041D05Rik	protein_coding	MGI:2181743	ncRNA_host	2	313.856	-1.09782	0.19956	-5.50122	3.77176e-08	5.85715e-06	1.48469	0.701913	0.92346	0.346041	0.318156	0.92161
ENSMUSG00000022210.8	chr14:55716215-55727797	Dhrs4	protein_coding	MGI:90169	NA	2	838.864	0.923868	0.168401	5.48611	4.10888e-08	6.29779e-06	7.85261	11.1111	16.8223	20.1447	23.5632	21.4899
ENSMUSG00000015568.17	chr8:69333143-69360100	Lpl	protein_coding	MGI:96820	NA	2	23527.3	1.3971	0.2552	5.47452	4.38706e-08	6.63795e-06	43.2768	94.7628	207.332	238.839	253.752	268.513
ENSMUSG00000033953.11	chr11:17109263-17150375	Ppp3r1	protein_coding	MGI:107172	overlapping_locus	2	3863.34	-0.426004	0.0780274	-5.45967	4.77033e-08	7.12652e-06	57.2981	48.5421	48.4125	38.1779	39.5967	36.6868
ENSMUSG00000026489.14	chr1:179992803-180027167	Coq8a	protein_coding	MGI:1914676	NA	2	25679.9	0.660361	0.12179	5.42211	5.89003e-08	8.68926e-06	95.3216	157.053	161.272	222.738	206.099	212.023
ENSMUSG00000041329.14	chr11:69490562-69496768	Atp1b2	protein_coding	MGI:88109	NA	2	7259.73	-0.612614	0.113109	-5.41612	6.09066e-08	8.87431e-06	75.5982	76.0138	85.2856	54.6841	56.6567	44.3486
ENSMUSG00000025170.14	chr11:121246951-121279077	Rab40b	protein_coding	MGI:2183451	ncRNA_host	2	398.117	-0.8127	0.151303	-5.37136	7.81459e-08	1.12473e-05	14.3719	8.29742	6.78559	5.13825	5.31751	5.54017
ENSMUSG00000027111.17	chr2:71575960-71688760	Itga6	protein_coding	MGI:96605	overlapping_locus	2	718.246	0.828944	0.15486	5.35287	8.65686e-08	1.23094e-05	1.48454	2.246	2.01765	4.28597	3.15636	2.76006
ENSMUSG00000002222.15	chr6:71365618-71417621	Rmnd5a	protein_coding	MGI:1915727	NA	2	6287.37	-0.367502	0.0687639	-5.3444	9.07152e-08	1.27455e-05	44.3654	40.0963	35.4387	32.0208	31.6526	28.9196
ENSMUSG00000020019.5	chr10:93476543-93583069	Ntn4	protein_coding	MGI:1888978	overlapping_locus	2	391.24	1.32207	0.247938	5.33227	9.69904e-08	1.34668e-05	1.82065	1.31401	3.44398	5.82241	4.1003	5.64009
ENSMUSG00000022255.17	chr15:34082865-34145770	Mtdh	protein_coding	MGI:1914404	NA	1	5108.81	-0.449693	0.0846512	-5.31231	1.08246e-07	1.48548e-05	28.437	29.9397	26.1262	19.6524	21.6371	20.5314
ENSMUSG00000027805.17	chr3:57749316-57755500	Pfn2	protein_coding	MGI:97550	NA	2	3784.29	-0.468785	0.0886139	-5.29019	1.22188e-07	1.65755e-05	51.0792	44.6936	44.1768	35.7745	37.4425	28.4506
ENSMUSG00000027577.15	chr2:180660173-180685339	Chrna4	protein_coding	MGI:87888	NA	2	19.6367	5.46482	1.03705	5.26958	1.36736e-07	1.83382e-05	0.0301388	0.00866227	0	0.383177	0.606732	0.0804397
ENSMUSG00000028927.7	chr4:140633655-140679897	Padi2	protein_coding	MGI:1338892	ncRNA_host	2	4938.92	0.902009	0.171506	5.25933	1.44581e-07	1.91724e-05	12.2382	29.3137	41.3312	57.8248	38.3343	42.5856
ENSMUSG00000009621.19	chr2:27152116-27317045	Vav2	protein_coding	MGI:102718	NA	2	133.646	1.16837	0.223595	5.22539	1.73791e-07	2.27897e-05	0.386692	0.496985	0.504892	1.34404	0.903872	0.894262
ENSMUSG00000047187.10	chr4:8535644-8607778	Rab2a	protein_coding	MGI:1928750	NA	2	4035.68	-0.431673	0.082828	-5.21168	1.8714e-07	2.41346e-05	85.128	77.1939	75.4819	58.0648	62.2805	55.9137
ENSMUSG00000022383.14	chr15:85619184-85687020	Ppara	protein_coding	MGI:104740	NA	2	569.311	0.818535	0.157088	5.21069	1.88136e-07	2.41346e-05	1.93339	2.92583	4.04332	4.45078	4.07343	7.03145
ENSMUSG00000026380.11	chr1:118555675-118612898	Tfcp2l1	protein_coding	MGI:2444691	ncRNA_host	2	357.677	-1.07053	0.205789	-5.20206	1.97091e-07	2.47602e-05	2.65679	0.428658	1.27018	0.290652	0.209711	2.73935
ENSMUSG00000032349.14	chr9:77824646-77891801	Elovl5	protein_coding	MGI:1916051	NA	2	300.42	0.666925	0.128207	5.20195	1.97208e-07	2.47602e-05	2.12183	2.41032	3.26911	3.94943	3.53786	4.83335
ENSMUSG00000028552.14	chr4:109137465-109245014	Eps15	protein_coding	MGI:104583	NA	2	1960.91	-0.370566	0.0713992	-5.19005	2.10233e-07	2.61175e-05	15.703	14.5873	14.6064	12.1576	11.0292	11.5735
ENSMUSG00000030246.13	chr6:142435975-142453683	Ldhb	protein_coding	MGI:96763	NA	2	7130.65	2.03534	0.392408	5.18678	2.1396e-07	2.63037e-05	15.4571	65.8624	181.504	231.758	239.876	271.654
ENSMUSG00000004035.13	chr3:107833650-107839133	Gstm7	protein_coding	MGI:1915562	NA	2	74.4532	1.68939	0.326255	5.17814	2.24115e-07	2.72681e-05	0.378156	0.597778	1.71756	2.22488	2.19599	2.91141
ENSMUSG00000056917.14	chr19:5701213-5713735	Sipa1	protein_coding	MGI:107576	NA	2	338.952	0.635761	0.123017	5.16809	2.36503e-07	2.83182e-05	2.5873	2.76627	2.99461	4.55621	4.24698	4.1353
ENSMUSG00000031672.9	chr8:96590762-96615175	Got2	protein_coding	MGI:95792	NA	2	19405.5	0.487519	0.0943796	5.16552	2.39778e-07	2.83182e-05	165.857	219.136	225.21	310.304	294.956	247.154
ENSMUSG00000078622.9	chr11:106088234-106107170	Ccdc47	protein_coding	MGI:1914413	overlapping_locus	2	3029.89	-0.329764	0.063841	-5.16539	2.39944e-07	2.83182e-05	19.4211	19.3568	19.6248	15.5243	15.551	15.4064
ENSMUSG00000020321.17	chr11:21506692-21522367	Mdh1	protein_coding	MGI:97051	ncRNA_host	2	18988.6	0.690291	0.133761	5.16063	2.46115e-07	2.86745e-05	168.528	222.592	225.62	364.318	349.7	279.892
ENSMUSG00000028788.15	chr4:129705012-129743796	Ptp4a2	protein_coding	MGI:1277117	NA	2	21753.8	-0.465436	0.0902123	-5.15934	2.47822e-07	2.86745e-05	206.042	226.053	224.647	174.244	169.416	134.644
ENSMUSG00000048458.9	chr3:105611915-105628158	Inka2	protein_coding	MGI:1923497	NA	2	301.297	0.87995	0.17079	5.15224	2.57391e-07	2.94925e-05	1.45627	2.16554	1.73192	3.31414	3.09943	3.34078
ENSMUSG00000044562.13	chr7:45276912-45288517	Rasip1	protein_coding	MGI:1917153	overlapping_locus	2	620.989	0.783185	0.152537	5.13438	2.83072e-07	3.21232e-05	3.24584	4.45616	4.37109	7.4802	6.55543	6.56038
ENSMUSG00000022332.9	chr15:68800269-68973060	Khdrbs3	protein_coding	MGI:1313312	NA	2	452.662	0.815782	0.159168	5.12528	2.97089e-07	3.33928e-05	1.94651	3.05894	5.36415	4.98092	5.48568	6.45854
ENSMUSG00000029312.13	chr5:104009839-104059125	Klhl8	protein_coding	MGI:2179430	NA	2	745.644	-0.543855	0.106179	-5.12207	3.02202e-07	3.3647e-05	11.7259	11.4542	8.721	7.51246	8.0677	6.2149
ENSMUSG00000045104.10	chr19:21914744-21915745	Ldhb-ps	processed_pseudogene	MGI:3645435	NA	2	179.113	2.49294	0.487269	5.11615	3.11843e-07	3.4396e-05	1.91336	3.51662	0.740041	16.4671	35.9973	1.36455
ENSMUSG00000067194.7	chrX:158155174-158172924	Eif1ax	protein_coding	MGI:1913485	NA	2	2904.32	-0.462876	0.0905448	-5.11212	3.18562e-07	3.45401e-05	24.9823	24.2743	23.1307	18.8961	18.5502	15.2729
ENSMUSG00000045761.17	chr17:71980256-72036664	Togaram2	protein_coding	MGI:2443498	NA	1	304.603	1.17617	0.230086	5.11186	3.19003e-07	3.45401e-05	1.52928	1.64226	2.00075	4.05029	3.10016	4.40985
ENSMUSG00000026457.15	chr1:134343116-134361089	Adipor1	protein_coding	MGI:1919924	NA	2	7589.23	-0.301281	0.0590486	-5.10226	3.35625e-07	3.60095e-05	86.0994	83.7106	82.5373	68.8728	70.2868	65.726
ENSMUSG00000039478.16	chr8:40760499-40839349	Micu3	protein_coding	MGI:1925756	NA	2	627.083	-0.628979	0.123469	-5.09421	3.50194e-07	3.72341e-05	8.14547	6.50559	6.40318	4.14196	5.01316	4.34962
ENSMUSG00000031555.16	chr8:25439627-25506943	Adam9	protein_coding	MGI:105376	NA	2	1899.14	-0.359018	0.0705767	-5.08692	3.6393e-07	3.83491e-05	19.7886	20.1388	17.4869	15.1136	14.7397	14.8463
ENSMUSG00000074656.13	chr2:154713330-154734855	Eif2s2	protein_coding	MGI:1914454	NA	1	4141.75	-0.466347	0.0922489	-5.05531	4.29684e-07	4.48773e-05	59.58	57.905	48.764	39.1599	46.0565	35.0844
ENSMUSG00000044080.10	chr3:90418341-90421699	S100a1	protein_coding	MGI:1338917	NA	2	2594.07	0.474089	0.0938942	5.04918	4.43711e-07	4.59357e-05	127.294	117.154	108.539	168.963	184.138	139.969
ENSMUSG00000034853.17	chr4:106601752-106662195	Acot11	protein_coding	MGI:1913736	NA	2	421.236	0.774451	0.153625	5.04117	4.6269e-07	4.74841e-05	1.84114	1.89638	2.29583	3.15049	2.95863	4.29994
ENSMUSG00000032238.18	chr9:68561068-69295528	Rora	protein_coding	MGI:104661	NA	2	2623.66	-0.567517	0.112777	-5.03221	4.84858e-07	4.93301e-05	8.70014	7.47164	8.30153	4.78936	4.97306	6.95616
ENSMUSG00000026603.14	chr1:189612689-189654560	Smyd2	protein_coding	MGI:1915889	NA	2	5852.34	-0.774625	0.154462	-5.015	5.30339e-07	5.31898e-05	199.923	149.262	102.756	88.4506	122.615	55.4763
ENSMUSG00000039601.17	chr17:44112242-44350407	Rcan2	protein_coding	MGI:1858219	NA	2	1886.8	0.668313	0.133277	5.01447	5.31808e-07	5.31898e-05	14.0094	13.3929	12.6781	21.4828	19.7763	22.4316
ENSMUSG00000032328.13	chr9:79676225-79700789	Tmem30a	protein_coding	MGI:106402	NA	2	2818.17	-0.366183	0.0731408	-5.00655	5.54139e-07	5.49575e-05	33.2432	30.0262	29.598	24.7631	23.4908	23.7281
ENSMUSG00000031385.15	chrX:72800705-72816120	Plxnb3	protein_coding	MGI:2154240	NA	2	65.1586	1.64896	0.329775	5.00025	5.72565e-07	5.60956e-05	0.209172	0.158713	0.261316	0.733306	0.544178	0.669931
ENSMUSG00000024219.17	chr17:28128280-28281749	Anks1	protein_coding	MGI:2446180	overlapping_locus	2	698.093	0.778262	0.155671	4.99939	5.7512e-07	5.60956e-05	1.22772	2.07174	1.8167	3.2284	3.04082	2.3886
ENSMUSG00000015112.16	chr6:6041218-6217173	Slc25a13	protein_coding	MGI:1354721	overlapping_locus	2	40.864	2.14265	0.428881	4.99591	5.85595e-07	5.66491e-05	0.111037	0.119675	0.271993	0.675811	0.616143	0.752285
ENSMUSG00000053886.5	chr8:68729219-68800351	Sh2d4a	protein_coding	MGI:1919531	NA	2	82.7755	1.49046	0.298922	4.98612	6.16023e-07	5.91082e-05	0.259395	0.463296	1.44102	1.47352	1.75978	1.80307
ENSMUSG00000024914.17	chr19:5472834-5475007	Drap1	protein_coding	MGI:1913806	NA	2	6335.22	-0.527566	0.106092	-4.9727	6.60267e-07	6.28425e-05	257.092	236.715	229.918	147.402	183.431	170.469
ENSMUSG00000026921.21	chr2:26470026-26483132	Egfl7	protein_coding	MGI:2449923	ncRNA_host	2	919.556	0.558514	0.112354	4.97102	6.66005e-07	6.28816e-05	11.469	13.5474	11.0402	22.0126	21.9207	11.2977
ENSMUSG00000061877.14	chr7:81144023-81148029	BC048679	protein_coding	MGI:3510776	NA	2	100.317	3.02468	0.610204	4.95683	7.16529e-07	6.71149e-05	0	1.42741	7.09659	8.06063	12.9807	6.9432
ENSMUSG00000023883.14	chr17:15165271-15181535	Phf10	protein_coding	MGI:1919307	NA	2	1328.89	-0.41733	0.0842519	-4.95336	7.29436e-07	6.77859e-05	13.3977	13.327	10.4918	9.18362	10.3707	8.19646
ENSMUSG00000027605.19	chr2:155359868-155427644	Acss2	protein_coding	MGI:1890410	overlapping_locus	1	1140.08	0.818982	0.165584	4.94603	7.57431e-07	6.98375e-05	6.28706	7.8178	9.24356	13.0292	12.371	15.4812
ENSMUSG00000024091.10	chr17:65885322-65920550	Vapa	protein_coding	MGI:1353561	NA	2	2822.36	-0.380221	0.0774555	-4.90889	9.15916e-07	8.37957e-05	38.2871	36.9617	27.9681	25.6421	27.6686	25.2725
ENSMUSG00000032198.10	chr9:21711156-21763931	Dock6	protein_coding	MGI:1914789	ncRNA_host	2	664.805	0.702579	0.143174	4.90718	9.23934e-07	8.3879e-05	2.092	2.24665	2.65815	4.2544	3.73749	3.39485
ENSMUSG00000020978.11	chr12:69343496-69357461	Klhdc2	protein_coding	MGI:1916804	NA	2	3099.64	-0.39836	0.0813801	-4.89505	9.82809e-07	8.85428e-05	76.4863	72.4347	62.2314	58.7815	56.7473	45.0539
ENSMUSG00000066735.9	chr5:129970811-130015533	Vkorc1l1	protein_coding	MGI:1916818	overlapping_locus	2	856.628	-0.401381	0.0823015	-4.87696	1.07735e-06	9.6216e-05	7.49786	6.88656	6.42361	5.21318	5.26597	5.25585
ENSMUSG00000028207.19	chr4:9448069-9669344	Asph	protein_coding	MGI:1914186	NA	2	5235.97	-0.517754	0.106191	-4.87569	1.08429e-06	9.6216e-05	14.526	17.458	11.8659	10.4913	11.7987	8.31766
ENSMUSG00000049173.9	chr18:60706822-60724860	Myoz3	protein_coding	MGI:2179296	NA	2	5750.75	-0.518883	0.106491	-4.87254	1.10171e-06	9.68367e-05	95.648	78.5592	50.0498	52.7396	52.3357	46.5846
ENSMUSG00000032702.17	chr19:25214339-25411860	Kank1	protein_coding	MGI:2147707	NA	2	711.094	-0.490054	0.100597	-4.87147	1.10769e-06	9.68367e-05	5.93802	5.24241	4.66443	3.83607	3.43587	3.98655
ENSMUSG00000047547.15	chr13:54740214-54759157	Cltb	protein_coding	MGI:1921575	NA	2	3201.82	-0.466013	0.0958159	-4.86363	1.15254e-06	0.000100017	59.0563	66.2433	49.9589	40.6139	44.5169	40.9656
ENSMUSG00000057880.13	chr16:8331293-8439432	Abat	protein_coding	MGI:2443582	NA	2	127.687	1.35613	0.279137	4.85828	1.18409e-06	0.000101696	0.215368	0.306806	1.15261	1.04865	0.63802	1.89169
ENSMUSG00000044788.11	chr11:115170448-115188489	Fads6	protein_coding	MGI:3039592	NA	2	576.018	0.779618	0.1605	4.85744	1.18912e-06	0.000101696	3.29878	1.90276	2.07124	3.71705	3.9027	4.51661
ENSMUSG00000067873.12	chrX:56098943-56112543	Htatsf1	protein_coding	MGI:1919709	NA	2	3570.21	-0.37068	0.0763344	-4.856	1.19781e-06	0.000101702	50.3884	47.5518	39.8194	35.5884	38.8663	31.7436
ENSMUSG00000054720.13	chr5:105667254-105760884	Lrrc8c	protein_coding	MGI:2140839	overlapping_locus	2	431.445	0.875487	0.180398	4.85308	1.21562e-06	0.000102476	1.18442	1.15265	1.42522	2.72053	1.87706	2.30371
ENSMUSG00000036257.16	chr12:44268153-44369315	Pnpla8	protein_coding	MGI:1914702	NA	1	4197.87	-0.318136	0.0656735	-4.84421	1.27118e-06	0.000106401	14.3021	12.5988	10.5329	9.43125	10.2121	10.1287
ENSMUSG00000029472.14	chr5:122925522-122959402	Anapc5	protein_coding	MGI:1929722	NA	2	15091.9	-0.506761	0.104748	-4.83788	1.31229e-06	0.000109068	142.096	140.893	188.785	103.792	110.718	115.413
ENSMUSG00000022546.6	chr15:76579916-76583886	Gpt	protein_coding	MGI:95802	NA	2	862.239	0.722131	0.149468	4.83133	1.35625e-06	0.000111934	10.2007	11.4103	14.4123	23.0037	20.5056	16.0698
ENSMUSG00000019806.14	chr10:13522798-13744724	Aig1	protein_coding	MGI:1913503	NA	2	126.787	1.04216	0.216335	4.81733	1.45494e-06	0.000119245	0.94625	1.16821	1.7516	2.80981	2.57542	2.39748
ENSMUSG00000036769.15	chrX:23559290-23672264	Wdr44	protein_coding	MGI:1919654	NA	2	588.811	-0.586185	0.121781	-4.81344	1.48351e-06	0.000120748	5.61916	7.41251	6.11023	4.42363	4.19585	4.08213
ENSMUSG00000025735.14	chr17:26053439-26056269	Rhbdl1	protein_coding	MGI:2384891	overlapping_locus	2	854.178	-0.55949	0.116639	-4.79677	1.61244e-06	0.000130342	15.8414	22.8492	21.6259	14.614	15.6741	10.6227
ENSMUSG00000021258.11	chr12:108145838-108169618	Ccnk	protein_coding	MGI:1276106	NA	2	3762.33	-0.509006	0.106252	-4.79054	1.66337e-06	0.000133545	68.9109	48.3183	51.5201	34.8698	41.1251	41.1533
ENSMUSG00000023571.5	chr4:156046775-156051086	C1qtnf12	protein_coding	MGI:1914639	NA	2	252.579	-0.851442	0.178428	-4.77191	1.82485e-06	0.00014552	9.04892	8.91693	6.53672	4.55587	5.07129	3.86725
ENSMUSG00000030541.17	chr7:79744594-79765140	Idh2	protein_coding	MGI:96414	NA	2	7540.17	1.28601	0.270186	4.75973	1.93851e-06	0.000153546	30.4366	53.3145	189.298	121.553	168.927	198.151
ENSMUSG00000013936.13	chr5:122239014-122251535	Myl2	protein_coding	MGI:97272	NA	2	5895.69	2.67593	0.562903	4.7538	1.99629e-06	0.000157068	0.206984	1.31621	224.294	9.70032	7.65258	204.582
ENSMUSG00000027828.13	chr3:65287076-65300044	Ssr3	protein_coding	MGI:1914687	NA	2	4544.5	-0.465962	0.0980987	-4.74993	2.0349e-06	0.000159046	45.8247	46.8362	54.8942	31.9049	39.9225	34.6631
ENSMUSG00000038670.12	chr7:44151123-44174080	Mybpc2	protein_coding	MGI:1336170	NA	2	150183	-0.907759	0.191191	-4.74791	2.05529e-06	0.000159582	1721.67	1523.67	2234.21	778.641	1021.46	1107.28
ENSMUSG00000035530.14	chr11:100210711-100212922	Eif1	protein_coding	MGI:105125	NA	2	15164.5	-0.297802	0.0627469	-4.74608	2.07399e-06	0.000159982	267.604	286.515	282.4	238.73	228.563	213.67
ENSMUSG00000037685.16	chr5:67775483-68004777	Atp8a1	protein_coding	MGI:1330848	ncRNA_host	2	2411.82	-0.740975	0.156654	-4.73002	2.24499e-06	0.000172048	15.2745	11.4004	11.0973	6.68699	7.14674	8.63623
ENSMUSG00000019370.11	chr7:16649304-16658039	Calm3	protein_coding	MGI:103249	NA	1	9249.35	-0.519203	0.110024	-4.71901	2.36994e-06	0.000180452	199.29	142.14	158.449	102.146	118.198	126.093
ENSMUSG00000063229.16	chr7:46490899-46505051	Ldha	protein_coding	MGI:96759	NA	2	62618.2	-0.479421	0.101659	-4.71597	2.40566e-06	0.000181997	1071.58	1027.02	893.554	776.276	871.252	536.456
ENSMUSG00000039960.6	chr8:124380668-124390623	Rhou	protein_coding	MGI:1916831	overlapping_locus	2	934.411	1.18895	0.252787	4.70337	2.55902e-06	0.000192367	2.78378	6.5298	8.45054	13.761	10.1436	13.8181
ENSMUSG00000022205.16	chr15:11981425-11997069	Sub1	protein_coding	MGI:104811	NA	2	894.878	-0.519893	0.110591	-4.70102	2.58864e-06	0.000193362	15.0798	9.02574	8.47306	7.28126	6.26903	8.59928
ENSMUSG00000061904.13	chr10:90952436-90959921	Slc25a3	protein_coding	MGI:1353498	ncRNA_host	2	24892.2	0.362511	0.077211	4.69507	2.66511e-06	0.000197822	347.03	394.456	356.565	483.454	511.973	418.767
ENSMUSG00000001334.10	chr4:129030792-129038386	Fndc5	protein_coding	MGI:1917614	NA	2	2536.06	0.823035	0.175531	4.68884	2.74762e-06	0.000202671	18.1504	27.9149	38.702	51.4046	50.0497	43.4683
ENSMUSG00000075595.10	chr11:95603499-95725941	Zfp652	protein_coding	MGI:2442221	overlapping_locus	2	3281.64	-0.320456	0.0685078	-4.67765	2.90178e-06	0.000212713	10.3688	9.09529	6.55785	7.1711	6.67258	6.64588
ENSMUSG00000018770.10	chr2:73738791-73741670	Atp5g3	protein_coding	MGI:2442035	NA	2	13677	0.377669	0.0808457	4.67148	2.99032e-06	0.00021785	194.661	229.417	183.737	282.32	294.507	216.553
ENSMUSG00000038623.10	chr7:81508749-81534182	Tm6sf1	protein_coding	MGI:1933209	NA	2	201.785	1.20079	0.258391	4.64717	3.36514e-06	0.000243653	1.43341	1.70755	2.44864	3.7193	3.43668	5.6573
ENSMUSG00000022519.15	chr16:4298080-4359680	Srl	protein_coding	MGI:2146620	NA	2	45974.8	-0.244708	0.0526852	-4.64471	3.40551e-06	0.000244712	363.288	364.017	327.407	307.521	289.04	292.706
ENSMUSG00000028964.15	chr4:150981590-150998894	Park7	protein_coding	MGI:2135637	NA	2	8160.72	-0.492793	0.106119	-4.64376	3.42125e-06	0.000244712	155.034	137.766	151.204	85.4589	107.604	124.298
ENSMUSG00000039704.9	chr15:9140637-9202569	Lmbrd2	protein_coding	MGI:2444173	NA	2	686.883	-0.502819	0.108325	-4.64177	3.45442e-06	0.000245597	4.02276	3.4212	3.45789	2.44221	2.48297	2.75591
ENSMUSG00000032035.17	chr9:32547544-32669116	Ets1	protein_coding	MGI:95455	NA	2	577.64	0.850243	0.183357	4.6371	3.53334e-06	0.000249341	3.68889	3.61774	3.48343	8.79796	7.54878	4.05847
ENSMUSG00000045983.17	chr16:20487063-20511634	Eif4g1	protein_coding	MGI:2384784	ncRNA_host	2	19791.7	-0.22564	0.0486696	-4.63616	3.54934e-06	0.000249341	124.921	121.35	112.679	99.5912	104.321	102.782
ENSMUSG00000038619.13	chr3:95532304-95539413	Ensa	protein_coding	MGI:1891189	NA	2	4544.06	-0.268085	0.0578993	-4.6302	3.6531e-06	0.000253837	37.9415	39.7886	34.1934	31.6901	31.3781	29.735
ENSMUSG00000020091.16	chr10:61264270-61288440	Eif4ebp2	protein_coding	MGI:109198	overlapping_locus	2	8607.45	-0.302205	0.0652709	-4.63002	3.65636e-06	0.000253837	69.4679	48.902	52.7499	41.0137	42.4817	54.8263
ENSMUSG00000034055.17	chrX:101557581-101687852	Phka1	protein_coding	MGI:97576	NA	1	24309.3	-0.771164	0.167039	-4.61667	3.89952e-06	0.000268296	213.951	186.682	160.719	93.2226	123.185	110.341
ENSMUSG00000028289.13	chr4:28813131-28967499	Epha7	protein_coding	MGI:95276	NA	2	151.742	-1.06347	0.230383	-4.6161	3.91009e-06	0.000268296	1.21486	0.875848	0.343853	0.526077	0.58757	0.128901
ENSMUSG00000020836.16	chr11:77353237-77361310	Coro6	protein_coding	MGI:2183448	NA	2	6061.43	0.656563	0.142569	4.60523	4.12019e-06	0.000281078	54.7251	55.0889	71.1107	103.792	90.7649	88.8064
ENSMUSG00000022244.8	chr15:10981842-10996712	Amacr	protein_coding	MGI:1098273	NA	2	533.94	0.54978	0.119561	4.59832	4.2591e-06	0.00028806	5.36274	6.07624	6.86462	9.83509	9.20392	7.85805
ENSMUSG00000051375.16	chr18:38318967-38345106	Pcdh1	protein_coding	MGI:104692	NA	1	317.522	0.740421	0.161041	4.59772	4.27135e-06	0.00028806	0.848806	0.964291	1.30302	2.0525	1.49205	1.60371
ENSMUSG00000027272.6	chr2:120690750-120801196	Ubr1	protein_coding	MGI:1277977	NA	2	1613.8	-0.509103	0.110867	-4.592	4.39021e-06	0.000294393	8.71299	8.02334	8.06912	6.12434	5.65107	5.65606
ENSMUSG00000055239.11	chr6:72818097-72876962	Kcmf1	protein_coding	MGI:1921537	NA	2	6096.98	-0.291234	0.0634812	-4.58771	4.48132e-06	0.000298805	80.5199	68.0236	54.8495	56.6354	57.2372	50.5266
ENSMUSG00000084929.2	chr4:120148547-120161089	Foxo6os	lncRNA	MGI:3028036	NA	2	203.312	1.17783	0.257004	4.58294	4.58478e-06	0.000303986	1.25525	2.14566	4.38299	5.68304	4.89937	5.03214
ENSMUSG00000046417.15	chr11:62495710-62539349	Lrrc75a	protein_coding	MGI:2682293	NA	2	93.094	-1.01284	0.221096	-4.581	4.62762e-06	0.000305113	2.22193	2.08243	1.76003	0.960365	0.984864	1.04127
ENSMUSG00000036093.8	chr2:52287963-52314913	Arl5a	protein_coding	MGI:1922673	NA	2	1391.33	-0.527566	0.115343	-4.57391	4.78714e-06	0.000313877	13.0681	12.5216	11.1698	7.81502	8.08774	9.74525
ENSMUSG00000025190.14	chr19:43488191-43513044	Got1	protein_coding	MGI:95791	NA	2	12221.9	0.620534	0.135812	4.56908	4.89871e-06	0.000319417	106.401	168.328	147.034	225.094	270.15	157.185
ENSMUSG00000030701.18	chr7:100292099-100311621	Plekhb1	protein_coding	MGI:1351469	NA	2	1114.86	-0.839903	0.183945	-4.56605	4.9701e-06	0.000322292	11.514	9.79545	19.9312	5.07397	7.44183	10.1175
ENSMUSG00000025326.13	chr7:58878498-58961284	Ube3a	protein_coding	MGI:105098	NA	2	2589.54	-0.478015	0.104729	-4.56432	5.01109e-06	0.000323174	9.6309	9.32544	8.29449	6.39584	6.29789	6.85732
ENSMUSG00000029705.18	chr5:136276989-136596299	Cux1	protein_coding	MGI:88568	ncRNA_host	2	2905.54	-0.378018	0.0829146	-4.55913	5.13668e-06	0.000327499	8.03538	7.68536	6.43036	5.83124	5.45885	5.6765
ENSMUSG00000071708.12	chrX:156226851-156275283	Sms	protein_coding	MGI:109490	NA	2	2900.11	-0.482513	0.105838	-4.55897	5.14055e-06	0.000327499	45.7764	28.3598	28.4969	22.3364	22.0726	27.7772
ENSMUSG00000020758.16	chr11:115865535-115899238	Itgb4	protein_coding	MGI:96613	NA	2	202.364	0.826248	0.18127	4.55812	5.16139e-06	0.000327499	0.467484	0.458894	1.28167	0.922164	0.794463	2.11741
ENSMUSG00000030695.17	chr7:126394406-126399923	Aldoa	protein_coding	MGI:87994	NA	2	465462	-0.530162	0.116392	-4.55498	5.23894e-06	0.000329843	8282.74	8033.46	7714.61	5892.93	6209.54	4685.29
ENSMUSG00000068697.8	chr14:20699175-20706608	Myoz1	protein_coding	MGI:1929471	NA	2	39468.9	-0.549277	0.12062	-4.55379	5.2689e-06	0.000329843	1259.02	955.613	1073.29	662.43	790.747	786.458
ENSMUSG00000051236.14	chr10:120617001-120735006	Msrb3	protein_coding	MGI:2443538	overlapping_locus	2	5020.7	-0.494489	0.108601	-4.55326	5.28218e-06	0.000329843	62.8411	53.3135	44.1698	36.6746	36.3171	39.8564
ENSMUSG00000031592.11	chr8:41692802-41785381	Pcm1	protein_coding	MGI:1277958	overlapping_locus	2	2050.28	-0.532842	0.117153	-4.54824	5.40967e-06	0.000336026	12.5514	11.8343	13.2944	9.10584	7.70595	9.25006
ENSMUSG00000038302.15	chr10:42188581-42354561	Afg1l	protein_coding	MGI:2148801	overlapping_locus	2	420.678	0.573897	0.126232	4.54636	5.45815e-06	0.00033675	4.47636	4.3904	4.94576	7.41664	7.23037	6.05407
ENSMUSG00000040111.18	chr9:40204529-40442679	Gramd1b	protein_coding	MGI:1925037	NA	2	426.603	1.06968	0.235323	4.54558	5.4784e-06	0.00033675	0.50962	0.784971	1.69982	1.9835	1.47619	2.18195
ENSMUSG00000021255.18	chr12:86407891-86568402	Esrrb	protein_coding	MGI:1346832	NA	2	347.507	1.23622	0.272148	4.54247	5.55983e-06	0.000339985	0.525632	1.39563	1.96713	3.19581	3.02763	2.19428
ENSMUSG00000087038.10	chr9:112063345-112177993	2900079G21Rik	lncRNA	MGI:1920268	NA	2	154.374	1.11296	0.245135	4.54019	5.62038e-06	0.000341916	0.247831	0.569837	0.482905	0.847137	1.01954	0.864979
ENSMUSG00000028333.11	chr4:46450902-46472657	Anp32b	protein_coding	MGI:1914878	NA	2	2154.15	-0.395236	0.0870966	-4.5379	5.68165e-06	0.000343871	53.51	52.6028	49.496	37.9366	37.8197	42.9176
ENSMUSG00000022122.16	chr14:104052061-104081838	Ednrb	protein_coding	MGI:102720	NA	2	420.575	0.824539	0.181744	4.53681	5.71123e-06	0.000343897	1.39554	2.09046	2.56386	3.58946	3.10731	3.70767
ENSMUSG00000032366.16	chr9:66929872-66956688	Tpm1	protein_coding	MGI:98809	NA	2	335538	-0.593074	0.130779	-4.53493	5.76221e-06	0.000344721	2598.48	2272.05	2426.69	1504.44	1711.59	1618.42
ENSMUSG00000031461.5	chr8:15107653-15183541	Myom2	protein_coding	MGI:1328358	NA	2	48778.1	-0.528639	0.11659	-4.53416	5.78332e-06	0.000344721	381.994	393.96	350.367	253.569	294.251	234.043
ENSMUSG00000040213.14	chr3:142406812-142452631	Kyat3	protein_coding	MGI:2677849	NA	2	319.134	0.740463	0.163448	4.53026	5.89117e-06	0.000348103	1.33437	1.90172	2.7959	2.95326	3.72853	3.02255
ENSMUSG00000028518.9	chr4:104887071-104967087	Prkaa2	protein_coding	MGI:1336173	NA	2	8021.04	-0.415916	0.0918141	-4.52998	5.89905e-06	0.000348103	44.9253	40.6141	39.3139	31.7103	31.5004	30.1659
ENSMUSG00000036879.16	chr8:86567588-86788005	Phkb	protein_coding	MGI:97578	overlapping_locus	1	13594.6	-0.679205	0.150035	-4.52699	5.98288e-06	0.000351293	88.9395	81.0507	70.9038	42.7701	49.3714	58.9271
ENSMUSG00000087543.2	chr15:79626899-79641595	Gm16576	lncRNA	MGI:4414996	NA	2	358.36	-0.629165	0.139131	-4.5221	6.12289e-06	0.000357734	3.0249	2.74503	2.44704	1.71227	2.06742	1.51807
ENSMUSG00000047419.6	chr13:93177221-93281232	Cmya5	protein_coding	MGI:1923719	NA	2	157995	-0.473423	0.104726	-4.52061	6.16627e-06	0.000358494	584.843	515.386	518.763	388.598	397.831	376.746
ENSMUSG00000019828.14	chr10:10561803-10958100	Grm1	protein_coding	MGI:1351338	NA	2	47.4023	2.47161	0.547116	4.51752	6.25667e-06	0.000361967	0.0197904	0.108072	0.145434	0.396153	0.858105	0.247848
ENSMUSG00000004364.15	chr1:80242640-80318197	Cul3	protein_coding	MGI:1347360	overlapping_locus	1	7222.01	-0.413403	0.0916308	-4.51162	6.43345e-06	0.000370378	67.4014	65.786	54.3604	47.5882	52.5684	40.5792
ENSMUSG00000026028.13	chr1:58939608-59012589	Trak2	protein_coding	MGI:1918077	NA	1	4607.81	0.361141	0.0802139	4.50222	6.72479e-06	0.000385271	24.6216	24.7828	23.2091	31.4464	30.3627	31.4371
ENSMUSG00000022800.15	chr16:32697870-32729245	Fyttd1	protein_coding	MGI:1917955	NA	2	2050.61	-0.378405	0.0840901	-4.49999	6.79567e-06	0.000387452	18.7374	17.7761	15.7753	12.9061	13.8747	13.324
ENSMUSG00000033152.14	chr6:88819540-88852026	Podxl2	protein_coding	MGI:2442488	NA	2	1568.46	-0.501321	0.111497	-4.49626	6.91578e-06	0.000391211	23.8602	26.3092	19.8156	16.1382	17.2337	15.8869
ENSMUSG00000019877.11	chr10:57391870-57408626	Serinc1	protein_coding	MGI:1926228	NA	2	4879.7	-0.302401	0.0672617	-4.49589	6.9279e-06	0.000391211	75.1705	69.5124	65.4839	59.154	60.5405	51.0032
ENSMUSG00000027253.16	chr2:91287856-91344124	Lrp4	protein_coding	MGI:2442252	NA	2	529.87	0.773008	0.172149	4.49034	7.11102e-06	0.000399639	0.98945	1.56961	1.58837	2.24126	2.13222	2.65068
ENSMUSG00000028978.13	chr5:24569808-24589472	Nos3	protein_coding	MGI:97362	NA	2	519.816	0.830059	0.185014	4.48647	7.24129e-06	0.000404885	2.34435	3.19	3.10313	6.15333	4.48123	4.64764
ENSMUSG00000025006.19	chr19:40283197-40502194	Sorbs1	protein_coding	MGI:700014	NA	2	2897.35	0.562613	0.125456	4.48454	7.30697e-06	0.000404885	7.86565	10.8294	12.3489	13.1401	14.8137	17.6223
ENSMUSG00000026950.19	chr2:52026659-52268486	Neb	protein_coding	MGI:97292	overlapping_locus	2	265599	-0.63737	0.142126	-4.48454	7.30728e-06	0.000404885	425.543	478.133	370.76	258.871	247.113	316.802
ENSMUSG00000032026.8	chr9:48379812-48391923	Rexo2	protein_coding	MGI:1888981	NA	2	1166.56	-0.348832	0.0778595	-4.48028	7.45449e-06	0.000411111	39.2666	36.6702	35.3921	30.0059	28.8897	28.5148
ENSMUSG00000021420.14	chr13:36301395-36910254	Fars2	protein_coding	MGI:1917205	ncRNA_host	2	632.663	0.43225	0.0965108	4.47878	7.50709e-06	0.000412087	3.55062	3.83887	3.33557	4.91798	5.3976	4.19631
ENSMUSG00000032280.17	chr9:61279648-61325779	Tle3	protein_coding	MGI:104634	NA	2	236.57	0.99635	0.222714	4.47367	7.68895e-06	0.000420116	0.575665	0.622302	1.05234	1.72222	1.04668	1.5823
ENSMUSG00000005716.17	chr15:78075314-78090600	Pvalb	protein_coding	MGI:97821	NA	2	158892	-0.84239	0.188434	-4.47047	7.80472e-06	0.000424476	8428.98	6909.99	6119.87	3634.68	4263.89	3965.98
ENSMUSG00000026923.16	chr2:26347915-26406675	Notch1	protein_coding	MGI:97363	ncRNA_host	2	656.055	0.663181	0.148429	4.46801	7.89506e-06	0.00042742	1.27764	1.81396	1.50895	2.51411	2.16445	2.60039
ENSMUSG00000028973.19	chr5:24598661-24615052	Abcb8	protein_coding	MGI:1351667	NA	1	1317.26	0.335393	0.0751046	4.46568	7.98152e-06	0.000430127	12.971	12.4558	12.4951	15.6426	16.3617	15.7822
ENSMUSG00000051985.13	chr1:135881316-135934080	Igfn1	protein_coding	MGI:3045352	NA	1	1993	1.12698	0.252665	4.46039	8.18107e-06	0.000438877	2.0919	10.0679	2.19464	12.971	20.7567	1.71331
ENSMUSG00000068874.14	chr3:94840367-94852069	Selenbp1	protein_coding	MGI:96825	NA	2	437.639	0.967845	0.217488	4.4501	8.58296e-06	0.000458353	2.4991	4.48708	14.5661	11.548	10.9878	10.2857
ENSMUSG00000039670.3	chr11:120347432-120348894	Oxld1	protein_coding	MGI:1913681	NA	2	206.674	0.698503	0.157314	4.44017	8.98874e-06	0.000477861	5.95747	7.00953	8.28473	12.3886	13.0054	9.40261
ENSMUSG00000042793.14	chr1:134911039-135033014	Lgr6	protein_coding	MGI:2441805	NA	2	73.834	2.27091	0.512648	4.42977	9.43354e-06	0.000499259	0.0515496	0.044448	0.47353	0.585667	0.414343	0.548827
ENSMUSG00000015733.14	chr6:17636233-17666971	Capza2	protein_coding	MGI:106222	NA	2	7641.91	-0.431736	0.0975284	-4.42677	9.56534e-06	0.000503974	128.245	112.651	118.777	82.694	97.081	86.4993
ENSMUSG00000036306.14	chr8:69585321-69636877	Lzts1	protein_coding	MGI:2684762	NA	2	103.069	1.46942	0.332054	4.42524	9.63334e-06	0.000505301	0.24477	0.236632	0.304334	0.698232	0.444129	1.1284
ENSMUSG00000042647.14	chr5:121734838-121757001	Acad12	protein_coding	MGI:2443320	NA	2	933.057	0.692694	0.156651	4.42189	9.78417e-06	0.000510941	3.32168	3.90556	5.37706	6.95577	7.45793	5.83243
ENSMUSG00000079418.6	chrX:139857656-139947266	Atg4a	protein_coding	MGI:2147903	NA	2	660.686	-0.409422	0.0926141	-4.42073	9.83685e-06	0.00051143	12.5223	10.2037	8.96813	7.83485	8.09212	7.71269
ENSMUSG00000027868.12	chr3:99147697-99261575	Tbx15	protein_coding	MGI:1277234	NA	2	6274.76	-0.382172	0.0865127	-4.41752	9.98394e-06	0.000516146	86.3493	66.2919	52.1872	52.0555	49.6669	52.4377
ENSMUSG00000020821.18	chr11:70591374-70622790	Kif1c	protein_coding	MGI:1098260	ncRNA_host	2	38540.3	-0.33119	0.0749833	-4.41685	1.0015e-05	0.000516146	218.673	215.728	194.765	160.907	183.982	155.142
ENSMUSG00000074218.4	chr7:29883569-29885503	Cox7a1	protein_coding	MGI:1316714	NA	2	4549.03	0.368329	0.0834637	4.41305	1.01924e-05	0.000523005	289.323	315.328	223.958	415.704	399.453	264.394
ENSMUSG00000009535.14	chr18:68433426-68457923	Rnmt	protein_coding	MGI:1915147	NA	2	874.955	-0.495383	0.112301	-4.4112	1.02798e-05	0.000525206	7.56831	6.58881	6.13675	4.84958	4.67193	4.82492
ENSMUSG00000038886.11	chr7:79998845-80021123	Man2a2	protein_coding	MGI:2150656	NA	2	9635	-0.557706	0.126517	-4.40815	1.04257e-05	0.000530361	66.7097	50.1471	53.9245	38.5527	40.9585	36.0392
ENSMUSG00000060679.15	chr1:42890393-42944843	Mrps9	protein_coding	MGI:1916777	NA	2	848.197	0.486551	0.11064	4.3976	1.09452e-05	0.000553499	7.20952	7.72406	7.10976	10.6079	11.6379	8.76618
ENSMUSG00000032216.16	chr9:72569628-72657134	Nedd4	protein_coding	MGI:97297	overlapping_locus	2	13291.5	-0.264138	0.060072	-4.39703	1.09743e-05	0.000553499	47.4508	44.9621	51.0149	37.8218	36.8124	45.1743
ENSMUSG00000044477.13	chr17:30223707-30429802	Zfand3	protein_coding	MGI:1096572	NA	2	4361.84	-0.33606	0.0764857	-4.39376	1.11408e-05	0.000559504	40.0678	40.887	37.1225	32.1521	29.7192	31.5485
ENSMUSG00000001729.15	chr12:112620255-112641318	Akt1	protein_coding	MGI:87986	ncRNA_host	2	1333.97	0.429815	0.0979311	4.38895	1.13898e-05	0.000568578	11.3645	13.1186	12.6314	20.0009	18.0217	12.8183
ENSMUSG00000030417.16	chr7:35341407-35346946	Pdcd5	protein_coding	MGI:1913538	NA	2	1420.81	-0.32969	0.0751274	-4.38842	1.14178e-05	0.000568578	57.2756	58.2316	50.1424	44.8634	47.5095	39.3876
ENSMUSG00000070498.4	chr5:125608838-125869647	Tmem132b	protein_coding	MGI:3609245	NA	2	78.0477	-1.48383	0.338935	-4.37791	1.19823e-05	0.000594181	2.15566	0.180044	0.0639372	0.0946945	0.0887643	0.139958
ENSMUSG00000045205.17	chr4:11261315-11322137	Dpy19l4	protein_coding	MGI:2685869	ncRNA_host	2	887.601	-0.469289	0.107256	-4.3754	1.21208e-05	0.000597111	4.82663	4.46779	4.52715	3.50246	3.08617	3.4101
ENSMUSG00000055053.19	chr10:81232020-81291469	Nfic	protein_coding	MGI:109591	ncRNA_host	2	12633.9	-0.417768	0.0954895	-4.37501	1.21426e-05	0.000597111	82.7555	87.6731	69.4734	68.3864	58.4019	52.7001
ENSMUSG00000019838.12	chr10:39909528-40018254	Slc16a10	protein_coding	MGI:1919722	NA	2	1508.89	-0.61335	0.140327	-4.37087	1.2375e-05	0.000606016	12.8326	8.74651	6.47672	5.15961	7.12318	5.37763
ENSMUSG00000037111.10	chr3:51422740-51468300	Setd7	protein_coding	MGI:1920501	overlapping_locus	2	7540.77	-0.481794	0.110453	-4.36196	1.28903e-05	0.000628642	49.6082	38.5947	43.3913	31.3025	30.3967	32.2401
ENSMUSG00000022040.9	chr14:66321823-66361949	Ephx2	protein_coding	MGI:99500	NA	2	1024.45	0.74523	0.170956	4.3592	1.30541e-05	0.000634009	7.88064	10.3326	15.324	16.4991	19.5216	18.1643
ENSMUSG00000025810.10	chr8:129085765-129229844	Nrp1	protein_coding	MGI:106206	ncRNA_host	2	989.34	0.647669	0.148633	4.3575	1.31557e-05	0.000636324	7.88274	8.34482	8.25459	16.5729	11.8232	10.3754
ENSMUSG00000032030.17	chr9:53525882-53581314	Cul5	protein_coding	MGI:1922967	NA	1	2717.93	-0.390262	0.0895934	-4.35592	1.32511e-05	0.000638323	18.0898	17.7828	16.2196	13.8979	12.8087	13.0139
ENSMUSG00000102676.2	chr1:40622055-40626001	Gm37435	TEC	MGI:5610663	NA	2	127.054	2.15045	0.494419	4.34945	1.36478e-05	0.000654173	0.153389	0.484946	0.720167	2.03314	1.62314	1.59033
ENSMUSG00000037552.18	chr7:28059029-28072024	Plekhg2	protein_coding	MGI:2141874	NA	2	317.099	0.944593	0.21721	4.34876	1.3691e-05	0.000654173	0.689454	1.0836	1.47509	2.54964	1.50914	1.96735
ENSMUSG00000020634.13	chr12:4929032-4957705	Ubxn2a	protein_coding	MGI:2442310	NA	2	4696.29	-0.491445	0.113112	-4.34475	1.39436e-05	0.000663556	76.09	78.5965	56.6659	49.3202	54.182	45.7853
ENSMUSG00000026814.17	chr2:32536607-32572681	Eng	protein_coding	MGI:95392	ncRNA_host	2	1318.13	0.63313	0.14576	4.34365	1.40135e-05	0.000664204	7.8351	10.1055	12.702	18.3767	12.6849	15.6336
ENSMUSG00000036737.13	chr9:119067498-119151493	Oxsr1	protein_coding	MGI:1917378	ncRNA_host	2	3499.45	-0.317436	0.0731379	-4.34024	1.42326e-05	0.000671893	28.8706	33.3915	25.4756	24.7492	25.9774	19.7794
ENSMUSG00000020734.14	chr11:115139995-115158069	Grin2c	protein_coding	MGI:95822	NA	2	20.0812	4.57451	1.05445	4.33831	1.43583e-05	0.000673915	0	0.00863647	0.0245358	0.585247	0.672139	0.104877
ENSMUSG00000029455.15	chr5:121704090-121731887	Aldh2	protein_coding	MGI:99600	NA	2	4568.21	0.70796	0.163206	4.33783	1.43897e-05	0.000673915	15.5303	33.2206	42.4821	45.3082	47.9739	45.9872
ENSMUSG00000037010.8	chrX:47114023-47123730	Apln	protein_coding	MGI:1353624	NA	2	68.6878	1.77878	0.411211	4.32572	1.52037e-05	0.000709224	0.336456	0.690726	0.313971	2.15831	2.12544	0.631555
ENSMUSG00000038729.25	chr4:57717657-57896984	Pakap	protein_coding	MGI:5141924	ncRNA_host	2	2112.78	0.712604	0.164833	4.32318	1.53793e-05	0.000714592	4.73292	6.07197	5.63437	9.39416	7.11135	10.7023
ENSMUSG00000000275.17	chr11:88890202-88911119	Trim25	protein_coding	MGI:102749	NA	2	478.476	0.704117	0.163077	4.31769	1.57671e-05	0.000729739	1.72734	1.77667	2.36263	3.31585	3.12749	3.04588
ENSMUSG00000022905.13	chr16:35803685-35857501	Kpna1	protein_coding	MGI:103560	NA	2	5264.8	-0.400649	0.0928862	-4.31333	1.60811e-05	0.000741362	43.2449	41.3153	32.6078	32.7976	28.1832	27.2984
ENSMUSG00000078816.11	chr7:3337704-3379615	Prkcg	protein_coding	MGI:97597	overlapping_locus	2	102.61	1.51479	0.351259	4.31245	1.61456e-05	0.000741439	0.210093	0.388179	0.578969	1.22999	0.790115	1.13687
ENSMUSG00000041460.17	chr6:119213487-119329368	Cacna2d4	protein_coding	MGI:2442632	NA	1	252.493	1.33909	0.310741	4.30935	1.63731e-05	0.000746214	2.4335	0.379954	0.132915	1.6279	1.24256	0.976268
ENSMUSG00000020456.18	chr11:6241633-6306642	Ogdh	protein_coding	MGI:1098267	NA	2	32754.8	0.333401	0.0773676	4.30932	1.6376e-05	0.000746214	178.722	225.514	219.84	276.245	292.686	218.976
ENSMUSG00000098900.3	chr7:7268497-7281266	Gm18190	transcribed_unprocessed_pseudogene	MGI:5010375	overlapping_locus	2	38.4344	4.38949	1.019	4.30763	1.65013e-05	0.000749032	0	0.186837	0.176932	2.37393	2.59123	0.95648
ENSMUSG00000027177.15	chr2:104256826-104324791	Hipk3	protein_coding	MGI:1314882	ncRNA_host	2	9500.37	-0.583176	0.135466	-4.30496	1.67019e-05	0.000755232	52.4863	55.8602	45.2794	34.6736	32.8445	34.9885
ENSMUSG00000020986.14	chr12:59005169-59058803	Sec23a	protein_coding	MGI:1349635	NA	2	3049.46	-0.475006	0.110624	-4.29388	1.75576e-05	0.000790895	35.0797	32.2268	30.1674	27.1226	25.2569	18.4375
ENSMUSG00000062077.15	chr5:31274056-31294974	Trim54	protein_coding	MGI:1889623	NA	2	10941.1	-0.363926	0.0849593	-4.28354	1.83945e-05	0.000824491	352.499	324.689	264.494	236.448	226.369	265.799
ENSMUSG00000002250.17	chr17:28451674-28520448	Ppard	protein_coding	MGI:101884	NA	2	975.463	0.411178	0.0960034	4.28295	1.84431e-05	0.000824491	6.96125	7.09671	8.55879	10.4309	9.58673	10.0317
ENSMUSG00000039987.16	chr5:20963661-21087122	Phtf2	protein_coding	MGI:1916020	overlapping_locus	2	5467.51	-0.402402	0.0941287	-4.27502	1.91119e-05	0.000851163	40.27	48.8901	42.133	33.7896	34.9058	30.6133
ENSMUSG00000019933.8	chr10:70040494-70055541	Mrln	protein_coding	MGI:1916813	NA	2	550.337	-0.724495	0.169573	-4.27248	1.93315e-05	0.000857708	27.177	17.4394	21.7513	9.75351	12.732	18.0094
ENSMUSG00000039952.16	chr9:108081833-108141157	Dag1	protein_coding	MGI:101864	NA	2	7499.48	-0.300385	0.0703663	-4.26887	1.96468e-05	0.000865538	45.8376	52.5988	47.4436	40.2019	40.6088	37.6178
ENSMUSG00000020029.7	chr10:95382869-95400008	Nudt4	protein_coding	MGI:1918457	ncRNA_host	2	12720.1	-0.446058	0.104493	-4.26878	1.96547e-05	0.000865538	173.848	222.863	109.698	145.915	162.025	71.2777
ENSMUSG00000071573.15	chr19:33115147-33369695	Rnls	polymorphic_pseudogene	MGI:1915045	NA	2	154.55	0.969977	0.227318	4.26705	1.98079e-05	0.000869043	2.48075	2.72722	2.52567	4.07667	6.17856	4.83211
ENSMUSG00000021549.15	chr13:85362899-85437249	Rasa1	protein_coding	MGI:97860	NA	2	593.524	-0.479576	0.112427	-4.26568	1.99293e-05	0.000871131	6.59939	5.86095	4.89013	3.91845	4.25247	4.1663
ENSMUSG00000042286.14	chr14:30860970-30890598	Stab1	protein_coding	MGI:2178742	NA	2	574.267	0.773735	0.181626	4.26004	2.04388e-05	0.000887536	1.32454	1.93608	2.05103	3.24513	2.16508	3.6789
ENSMUSG00000032393.16	chr9:64939696-64989933	Dpp8	protein_coding	MGI:1921638	NA	2	4585.89	-0.351676	0.0825556	-4.25987	2.0455e-05	0.000887536	19.1507	16.5508	17.7703	13.6918	14.4427	13.6891
ENSMUSG00000035133.10	chr12:52550755-52618758	Arhgap5	protein_coding	MGI:1332637	NA	2	1674.87	-0.562482	0.132306	-4.25136	2.12472e-05	0.000918532	7.43786	6.83276	5.9455	4.77235	4.423	4.44125
ENSMUSG00000024286.9	chr18:9312304-9450150	Ccny	protein_coding	MGI:1915224	NA	2	3003.84	-0.327324	0.0772853	-4.23526	2.28284e-05	0.000983287	22.3911	21.4978	18.5584	17.2036	16.8371	15.6317
ENSMUSG00000032423.13	chr9:88329062-88364627	Syncrip	protein_coding	MGI:1891690	overlapping_locus	2	2247.86	-0.403482	0.0953757	-4.23045	2.33223e-05	0.000996379	9.26211	9.48563	8.54073	7.14289	7.24898	6.24175
ENSMUSG00000053093.17	chr14:55208141-55232083	Myh7	protein_coding	MGI:2155600	ncRNA_host	2	27647.9	3.76673	0.890448	4.23016	2.33529e-05	0.000996379	0.0474548	0.252323	233.37	1.92552	5.76461	232.184
ENSMUSG00000059263.10	chr7:111622711-111710868	Usp47	protein_coding	MGI:1922246	NA	2	11871.3	-0.385303	0.0910916	-4.22984	2.33856e-05	0.000996379	83.8493	93.3785	66.4199	64.7211	62.2009	58.5532
ENSMUSG00000087644.2	chrX:7517345-7523497	Gm14703	lncRNA	MGI:3705165	NA	2	56.3664	1.33171	0.31497	4.22805	2.3572e-05	0.00100071	0.360374	0.430239	0.729978	1.64222	1.4023	0.819547
ENSMUSG00000030022.15	chr6:92749680-92920473	Adamts9	protein_coding	MGI:1916320	NA	2	543.117	1.13649	0.268911	4.22627	2.37599e-05	0.00100507	0.519256	0.650758	0.998339	2.31272	1.14381	1.16027
ENSMUSG00000007613.16	chr4:47353222-47414931	Tgfbr1	protein_coding	MGI:98728	NA	2	886.212	-0.502425	0.118913	-4.22516	2.38768e-05	0.00100641	5.43594	5.43274	5.6696	3.94766	3.63101	4.10902
ENSMUSG00000047141.6	chr16:64600710-64672015	Zfp654	protein_coding	MGI:1919270	NA	2	792.314	-0.569113	0.134982	-4.21622	2.48427e-05	0.00104339	6.03558	5.64879	4.30314	3.68166	3.60215	3.39482
ENSMUSG00000051185.10	chr1:95241348-95263009	Fam174a	protein_coding	MGI:1914948	overlapping_locus	2	1297.43	-0.382241	0.0907195	-4.21343	2.51519e-05	0.00105263	11.9266	12.8409	9.35117	8.75161	9.79716	7.5201
ENSMUSG00000029864.8	chr6:42222869-42227375	Gstk1	protein_coding	MGI:1923513	NA	2	689.985	0.464614	0.110381	4.2092	2.56273e-05	0.00106874	17.6859	21.2974	25.1592	30.8596	32.8703	24.9028
ENSMUSG00000040118.16	chr5:16139689-16579509	Cacna2d1	protein_coding	MGI:88295	overlapping_locus	2	11995.9	-0.646403	0.153616	-4.20791	2.57748e-05	0.0010711	65.9387	65.6444	56.3279	37.8389	41.7759	40.272
ENSMUSG00000007122.12	chr1:172037461-172047435	Casq1	protein_coding	MGI:1309468	NA	1	56301.7	-0.498638	0.118538	-4.20656	2.59289e-05	0.00107373	1376.66	1302.98	1209.09	887.865	987.737	871.482
ENSMUSG00000031871.10	chr8:104828257-104871143	Cdh5	protein_coding	MGI:105057	NA	2	2057.28	0.533656	0.126995	4.20217	2.64368e-05	0.00109093	16.0372	17.1813	15.9078	26.7692	23.6077	20.9751
ENSMUSG00000007721.7	chr8:71320871-71326579	Ccdc124	protein_coding	MGI:1916403	NA	2	2087.19	-0.356762	0.0850294	-4.19575	2.71973e-05	0.00111841	51.315	53.8387	45.5071	37.2735	41.1525	38.7698
ENSMUSG00000036450.5	chr19:44551289-44564713	Hif1an	protein_coding	MGI:2442345	NA	2	8373.94	-0.29513	0.0703953	-4.19247	2.7593e-05	0.00113074	61.1798	52.9692	52.0915	43.501	46.9309	44.7003
ENSMUSG00000036553.17	chr5:35854524-35897331	Sh3tc1	protein_coding	MGI:2678949	NA	1	132.77	1.08167	0.258155	4.19	2.78958e-05	0.00113919	0.433812	0.486264	0.66416	1.29377	1.03007	1.01533
ENSMUSG00000037326.11	chr17:26177341-26204770	Capn15	protein_coding	MGI:1355075	NA	2	323.619	0.774577	0.18538	4.17831	2.93682e-05	0.0011924	1.445	1.61239	1.59631	2.35295	2.59843	2.95504
ENSMUSG00000031010.18	chrX:12937737-13039567	Usp9x	protein_coding	MGI:894681	NA	2	3339.87	-0.763189	0.182666	-4.17806	2.94009e-05	0.0011924	12.2361	11.5698	12.2748	6.56673	5.19476	10.2535
ENSMUSG00000000532.12	chr15:101071948-101111565	Acvr1b	protein_coding	MGI:1338944	ncRNA_host	2	1722.61	-0.675577	0.161917	-4.17238	3.01438e-05	0.00121835	19.4249	19.3386	14.0707	12.4367	10.3157	10.0792
ENSMUSG00000036371.7	chr6:67215160-67274720	Serbp1	protein_coding	MGI:1914120	NA	2	9063.13	-0.332326	0.0797939	-4.1648	3.11619e-05	0.0012552	22.6141	26.6931	21.7392	18.3621	20.1222	17.8285
ENSMUSG00000030835.7	chr7:45683122-45733636	Nomo1	protein_coding	MGI:2385850	NA	2	4330.11	-0.298403	0.0716814	-4.1629	3.14224e-05	0.00126139	32.5327	38.9647	44.1278	30.0267	33.335	29.9868
ENSMUSG00000053898.13	chr7:28524642-28531672	Ech1	protein_coding	MGI:1858208	NA	2	4494.17	0.542959	0.1305	4.1606	3.17414e-05	0.00126987	71.2562	99.5371	123.139	131.691	173.308	116.269
ENSMUSG00000062960.11	chr5:76093487-76139118	Kdr	protein_coding	MGI:96683	NA	2	1489.42	0.770585	0.18559	4.15209	3.29457e-05	0.00130939	8.84023	10.1999	8.38655	20.665	18.6485	9.53112
ENSMUSG00000037493.7	chr9:54452078-54467502	Cib2	protein_coding	MGI:1929293	NA	2	1957.37	-0.565291	0.136147	-4.15205	3.29512e-05	0.00130939	66.1901	47.0233	60.3489	35.3715	35.8202	46.2973
ENSMUSG00000036112.16	chr10:93694351-93732955	Metap2	protein_coding	MGI:1929701	NA	2	5577.56	-0.323516	0.0779489	-4.15036	3.31958e-05	0.00131296	54.0847	38.5583	31.8781	32.7789	33.0096	31.4364
ENSMUSG00000010064.16	chr9:107527833-107546729	Slc38a3	protein_coding	MGI:1923507	NA	2	2672.99	0.898864	0.2166	4.14989	3.32635e-05	0.00131296	16.7509	23.836	10.2941	34.0079	29.739	26.3388
ENSMUSG00000026409.15	chr1:130616919-130656990	Pfkfb2	protein_coding	MGI:107815	overlapping_locus	2	450.786	0.678199	0.163468	4.14882	3.34196e-05	0.00131473	2.17149	2.73432	1.76137	4.68812	3.46843	2.6194
ENSMUSG00000028229.12	chr4:19575162-19606932	Rmdn1	protein_coding	MGI:1913552	overlapping_locus	2	645.272	0.566344	0.136535	4.14798	3.35422e-05	0.00131517	8.78996	10.2827	10.577	15.1841	15.6814	13.0598
ENSMUSG00000003476.17	chr6:55067034-55109999	Crhr2	protein_coding	MGI:894312	NA	2	1164.69	0.374705	0.0903661	4.14652	3.37567e-05	0.00131919	13.9418	14.2081	9.93286	18.1182	18.7712	12.597
ENSMUSG00000075470.3	chr15:90108514-90117674	Alg10b	protein_coding	MGI:2146159	ncRNA_host	2	879.565	-0.413996	0.0998627	-4.14565	3.38844e-05	0.00131981	5.5206	5.57851	6.02217	4.20891	4.28428	4.38242
ENSMUSG00000043391.11	chr16:21467795-21513415	2510009E07Rik	protein_coding	MGI:1919440	NA	2	1109.83	-0.458924	0.110916	-4.13758	3.50982e-05	0.0013626	8.255	8.9668	5.99201	6.53065	5.61801	4.6678
ENSMUSG00000039967.15	chr4:34803113-34882960	Zfp292	protein_coding	MGI:1353423	NA	2	479.359	-0.492145	0.119149	-4.1305	3.61977e-05	0.00140067	1.92998	2.06488	2.14105	1.38171	1.42393	1.55901
ENSMUSG00000056121.17	chr17:78676641-78725581	Fez2	protein_coding	MGI:2675856	NA	2	1818.43	-0.393204	0.0952818	-4.12674	3.67935e-05	0.00141907	18.3303	14.1135	12.2296	11.2872	10.7063	11.6026
ENSMUSG00000096146.3	chr7:45743377-45750188	Kcnj11	protein_coding	MGI:107501	NA	2	4751.63	-0.392714	0.0952382	-4.1235	3.73164e-05	0.00143455	53.6493	62.9991	49.2146	46.4101	47.9069	33.1788
ENSMUSG00000018377.11	chr11:87959105-87975555	Vezf1	protein_coding	MGI:1313291	NA	2	3975.5	-0.385876	0.0936884	-4.11872	3.80986e-05	0.00145848	33.4339	35.7111	36.8733	28.5559	28.9918	23.7871
ENSMUSG00000034021.16	chr5:150597204-150734155	Pds5b	protein_coding	MGI:2140945	ncRNA_host	1	1411.94	-0.517151	0.125577	-4.11819	3.81859e-05	0.00145848	7.16532	5.57335	6.60076	4.28315	4.23605	4.97219
ENSMUSG00000026229.18	chr1:85992109-86066873	Psmd1	protein_coding	MGI:1917497	ncRNA_host	2	5302.7	-0.36002	0.0876782	-4.10616	4.02299e-05	0.00152742	59.0123	59.7372	48.6118	42.2981	44.192	43.352
ENSMUSG00000029816.11	chr6:49013549-49047863	Gpnmb	protein_coding	MGI:1934765	NA	2	50.0436	1.36086	0.331429	4.10604	4.02497e-05	0.00152742	0.120385	0.160419	0.629998	0.497354	0.367198	1.24028
ENSMUSG00000019927.7	chr10:71090810-71121092	Ube2d1	protein_coding	MGI:2384911	NA	2	3998.33	-0.458158	0.111619	-4.10464	4.04938e-05	0.00153176	121.142	119.835	126.998	82.973	97.8016	86.9695
ENSMUSG00000020658.11	chr12:4012554-4088915	Efr3b	protein_coding	MGI:2444851	NA	2	380.42	0.941399	0.229503	4.10191	4.09756e-05	0.00154503	1.39817	1.39691	1.37268	2.91163	2.23388	2.8614
ENSMUSG00000019899.18	chr10:26857281-27492862	Lama2	protein_coding	MGI:99912	overlapping_locus	2	1333.87	-0.866772	0.211377	-4.10059	4.12094e-05	0.0015489	5.34519	6.97896	5.34821	2.96098	2.28446	5.04582
ENSMUSG00000060073.10	chr12:71021395-71043121	Psma3	protein_coding	MGI:104883	NA	2	2765.76	-0.262975	0.064159	-4.0988	4.15292e-05	0.00155596	40.2388	40.3188	36.3763	33.6103	33.3566	30.5439
ENSMUSG00000058966.14	chr7:126396840-126429391	Tlcd3b	protein_coding	MGI:1916202	NA	2	2305.62	-0.831853	0.203007	-4.09767	4.17336e-05	0.00155682	26.0788	36.5925	20.234	20.0188	20.3445	8.43394
ENSMUSG00000030983.5	chr7:133311062-133322874	Bccip	protein_coding	MGI:1913415	NA	2	1724.25	-0.306979	0.0749243	-4.09718	4.18213e-05	0.00155682	56.5454	56.3517	50.5993	42.9271	47.4981	41.5203
ENSMUSG00000028760.17	chr4:137720333-137935819	Eif4g3	protein_coding	MGI:1923935	ncRNA_host	2	5486.33	-0.263842	0.0644069	-4.09648	4.19478e-05	0.00155682	19.3006	20.433	19.2168	16.165	17.4251	15.5043
ENSMUSG00000042903.9	chrX:100298134-100304479	Foxo4	protein_coding	MGI:1891915	NA	2	5597.67	-0.36778	0.0898088	-4.09514	4.21909e-05	0.00156093	64.8714	72.8735	57.866	50.647	56.6963	44.2533
ENSMUSG00000002504.16	chr17:24858260-24869301	Slc9a3r2	protein_coding	MGI:1890662	NA	2	1291.33	0.609304	0.148958	4.09044	4.30564e-05	0.00158251	11.2978	11.4041	16.5202	22.0619	16.3593	20.8755
ENSMUSG00000022551.9	chr15:76227723-76230460	Cyc1	protein_coding	MGI:1913695	NA	2	12940.8	0.301728	0.0737685	4.0902	4.31003e-05	0.00158251	248.29	262.372	213.224	307.952	329.105	256.161
ENSMUSG00000109511.2	chr7:44465512-44480236	Nup62	protein_coding	MGI:1351500	overlapping_locus	2	501.386	-0.565032	0.138157	-4.08979	4.31763e-05	0.00158251	9.26315	6.78288	5.95417	4.82019	4.87276	4.96495
ENSMUSG00000078812.11	chr11:69807540-69812784	Eif5a	protein_coding	MGI:106248	NA	2	6798.75	-0.291383	0.0713149	-4.08586	4.3913e-05	0.00160452	124.953	116.963	107.534	92.789	101.673	90.6481
ENSMUSG00000038195.7	chr11:75400920-75403994	Rilp	protein_coding	MGI:2144271	NA	2	757.03	0.44577	0.109175	4.08307	4.44438e-05	0.00161799	16.4334	15.2797	15.7077	22.135	21.0756	21.3494
ENSMUSG00000034911.9	chr8:71836916-71848434	Ushbp1	protein_coding	MGI:1922920	NA	2	689.309	0.805715	0.19744	4.0808	4.48809e-05	0.00161799	5.44429	6.26722	6.17935	12.4679	12.6904	7.23316
ENSMUSG00000045103.20	chrX:81992509-84249747	Dmd	protein_coding	MGI:94909	ncRNA_host	2	4264.9	-0.607488	0.148872	-4.08061	4.49171e-05	0.00161799	9.67653	11.0615	11.9863	6.67438	6.00406	9.10956
ENSMUSG00000049751.7	chr12:69229505-69230857	Rpl36al	protein_coding	MGI:1913733	overlapping_locus	2	1263.93	-0.440486	0.107949	-4.0805	4.49393e-05	0.00161799	34.9773	41.2834	40.3279	28.3241	31.952	25.6772
ENSMUSG00000061353.12	chr6:117145496-117158328	Cxcl12	protein_coding	MGI:103556	NA	2	2594.6	0.781705	0.191588	4.08014	4.50077e-05	0.00161799	9.85089	10.6568	15.9662	25.7266	22.4783	14.7083
ENSMUSG00000021669.16	chr13:96679126-96776675	Cert1	protein_coding	MGI:1915268	NA	2	1760.78	-0.341242	0.083645	-4.07965	4.51041e-05	0.00161799	14.1532	12.4185	10.7696	10.1519	9.41076	9.76112
ENSMUSG00000087679.3	chr2:26026826-26030533	Tmem250-ps	protein_coding	MGI:1924939	NA	2	500.868	0.536815	0.131612	4.07877	4.52748e-05	0.00161919	5.66903	5.9918	7.49087	9.43187	10.1318	8.17223
ENSMUSG00000052135.9	chr4:120124276-120144546	Foxo6	protein_coding	MGI:2676586	NA	2	243.776	0.904579	0.221994	4.07479	4.60559e-05	0.00163737	2.52744	2.7615	2.4103	5.62084	4.61102	4.23041
ENSMUSG00000031636.8	chr8:46338498-46372585	Pdlim3	protein_coding	MGI:1859274	NA	2	11778.8	-0.652891	0.160228	-4.07477	4.60605e-05	0.00163737	244.808	373.676	230.991	172.083	174.767	187.33
ENSMUSG00000036275.14	chr11:52287255-52299555	9530068E07Rik	protein_coding	MGI:2654705	overlapping_locus	2	1557.85	-0.31317	0.0769085	-4.07199	4.6614e-05	0.00165207	18.2308	20.7479	19.0011	16.1486	15.6525	14.915
ENSMUSG00000042670.6	chr2:105734983-105795903	Immp1l	protein_coding	MGI:1913791	NA	2	1052.47	-0.33981	0.08347	-4.07104	4.68042e-05	0.00165384	42.5279	45.6428	44.7436	35.7982	39.6778	29.9682
ENSMUSG00000074743.5	chr2:148246386-148250108	Thbd	protein_coding	MGI:98736	NA	2	1044.03	0.714356	0.175593	4.06824	4.73688e-05	0.00166879	3.63181	4.10131	7.82584	7.87406	6.63836	9.78224
ENSMUSG00000035027.19	chr10:80941749-80969809	Map2k2	protein_coding	MGI:1346867	NA	2	4237.22	-0.341824	0.0841197	-4.06354	4.83345e-05	0.00169775	39.8962	39.0813	33.5566	27.9978	32.1851	28.3442
ENSMUSG00000030730.13	chr7:126045030-126062280	Atp2a1	protein_coding	MGI:105058	NA	2	945112	-0.461422	0.113745	-4.05665	4.97817e-05	0.00174339	10035.5	10894.4	11243.2	7440.99	8797.59	7144.5
ENSMUSG00000035776.15	chrX:70463666-70536455	Cd99l2	protein_coding	MGI:2177151	NA	2	2987.87	-0.495204	0.122171	-4.05338	5.04838e-05	0.00176275	34.7268	34.1031	30.9633	25.6665	20.0022	24.9885
ENSMUSG00000019843.15	chr10:39244851-39441377	Fyn	protein_coding	MGI:95602	NA	2	290.416	0.782448	0.193468	4.04432	5.24742e-05	0.00182345	1.24888	1.52551	2.05364	3.13429	1.91605	3.16941
ENSMUSG00000024942.20	chr19:6038573-6065927	Capn1	protein_coding	MGI:88263	NA	2	2468.4	-0.263295	0.0651168	-4.04343	5.26757e-05	0.00182345	30.0965	28.5376	29.7517	23.7263	25.2411	24.6386
ENSMUSG00000026771.15	chr2:23396232-23462118	Spopl	protein_coding	MGI:1924107	NA	2	643.402	-0.598285	0.147967	-4.04338	5.26857e-05	0.00182345	4.81611	3.8277	4.41712	2.75236	2.90618	2.9524
ENSMUSG00000015711.9	chr3:95160985-95189387	Prune1	protein_coding	MGI:1925152	NA	2	2031.76	-0.327185	0.0809345	-4.04259	5.28637e-05	0.00182426	31.5407	27.0848	22.6412	23.4313	21.9705	19.0109
ENSMUSG00000022469.18	chr15:97642651-97665853	Rapgef3	protein_coding	MGI:2441741	NA	2	455.449	0.613447	0.151832	4.0403	5.33824e-05	0.00183149	2.05401	2.55495	3.16185	4.46319	3.74275	3.61556
ENSMUSG00000032724.6	chr2:103396655-103548768	Abtb2	protein_coding	MGI:2139365	NA	2	377.554	0.873378	0.216167	4.0403	5.33837e-05	0.00183149	1.39681	2.02653	1.15248	2.59966	3.51008	2.22034
ENSMUSG00000004319.16	chr8:61363423-61436334	Clcn3	protein_coding	MGI:103555	NA	2	1591.68	-0.354381	0.0877708	-4.03757	5.40081e-05	0.00184755	10.3018	9.01373	9.57724	6.99657	7.35446	8.26499
ENSMUSG00000040488.19	chr7:27004561-27037117	Ltbp4	protein_coding	MGI:1321395	NA	2	2997.6	0.652514	0.161643	4.03677	5.41924e-05	0.00184849	10.0116	13.0932	20.5396	23.1014	16.9016	26.1528
ENSMUSG00000030884.13	chr7:120234399-120258747	Uqcrc2	protein_coding	MGI:1914253	NA	2	15335.4	0.247424	0.0613754	4.03132	5.54649e-05	0.00188645	247.475	259.295	227.248	309.754	318.41	247.268
ENSMUSG00000027470.10	chr2:152753272-152764988	Mylk2	protein_coding	MGI:2139434	NA	2	32995.5	-0.587355	0.145772	-4.02928	5.5947e-05	0.00189738	741.33	439.338	350.072	381.681	361.105	248.469
ENSMUSG00000040283.15	chr11:49056412-49077986	Btnl9	protein_coding	MGI:2442439	NA	1	196.724	1.30154	0.323121	4.02803	5.62467e-05	0.00190207	0.68088	0.963971	0.808195	2.19654	1.93086	1.86903
ENSMUSG00000067786.17	chr2:157401998-157404442	Nnat	protein_coding	MGI:104716	NA	2	83.1879	-5.6838	1.41188	-4.0257	5.68062e-05	0.00191551	0.280681	0.0605033	9.79757	0	0	0.388971
ENSMUSG00000039197.11	chr14:21102642-21498637	Adk	protein_coding	MGI:87930	ncRNA_host	2	2046.17	0.472646	0.117511	4.02216	5.76672e-05	0.001939	17.2402	22.9957	22.4239	32.776	32.2541	22.3473
ENSMUSG00000099411.2	chr16:13331995-13338971	2310015D24Rik	lncRNA	MGI:1917350	NA	2	409.999	-0.664334	0.165423	-4.01597	5.92011e-05	0.00198033	8.77721	7.23837	4.59124	5.32865	3.86995	3.51188
ENSMUSG00000040666.20	chr16:96001650-96030135	Sh3bgr	protein_coding	MGI:1354740	NA	2	10417.1	-0.42693	0.106311	-4.01585	5.92321e-05	0.00198033	359.433	262.286	243.317	195.926	197.494	244.519
ENSMUSG00000032946.17	chr19:6449370-6465246	Rasgrp2	protein_coding	MGI:1333849	NA	2	355.076	1.05243	0.262173	4.01428	5.96286e-05	0.00198796	1.41392	1.80935	1.91043	3.51512	2.80933	4.27827
ENSMUSG00000086219.8	chr5:116576779-116603546	Srrm4os	lncRNA	MGI:1924048	NA	2	43.8346	-1.44411	0.359881	-4.01275	6.00159e-05	0.00199523	0.317484	0.595101	1.03975	0.246442	0.220883	0.187042
ENSMUSG00000038028.10	chr6:127062079-127086520	Tigar	protein_coding	MGI:2442752	NA	2	3445.98	-0.483288	0.120732	-4.003	6.25448e-05	0.00207347	49.4179	36.5449	40.2637	29.6159	32.4147	27.6255
ENSMUSG00000020376.18	chr11:49916173-50016546	Rnf130	protein_coding	MGI:1891717	ncRNA_host	2	1352.36	-0.351101	0.0877913	-3.99927	6.35391e-05	0.0020956	6.90633	7.19131	5.68548	5.26146	5.89308	4.36696
ENSMUSG00000032314.15	chr9:55361792-55419527	Etfa	protein_coding	MGI:106092	NA	2	5864.72	0.498921	0.124756	3.99916	6.35677e-05	0.0020956	85.0953	103.717	109.157	140.232	156.228	124.129
ENSMUSG00000074505.7	chr9:15821485-16412581	Fat3	protein_coding	MGI:2444314	NA	2	107.77	-1.43175	0.358482	-3.99393	6.49883e-05	0.00213333	0.294323	0.364515	0.136001	0.280104	0.16988	0.0115359
ENSMUSG00000037411.11	chr5:137090358-137101113	Serpine1	protein_coding	MGI:97608	NA	2	388.679	-1.82435	0.456816	-3.99361	6.50737e-05	0.00213333	1.17292	2.21049	2.68846	0.557509	0.259477	1.33132
ENSMUSG00000018415.15	chr11:60307971-60341753	Gid4	protein_coding	MGI:1914021	overlapping_locus	2	4159.9	-0.318801	0.0798435	-3.99282	6.52912e-05	0.00213453	33.7732	34.9518	36.8995	27.5422	28.8431	28.2124
ENSMUSG00000053774.10	chr16:32151075-32212565	Ubxn7	protein_coding	MGI:2146388	NA	2	446.055	-0.442445	0.110899	-3.9896	6.61836e-05	0.00215278	1.69267	1.91926	1.7526	1.35378	1.38636	1.20827
ENSMUSG00000020859.17	chr11:93886917-94016911	Spag9	protein_coding	MGI:1918084	NA	2	7453.5	-0.333036	0.0834782	-3.9895	6.62141e-05	0.00215278	28.0956	26.4101	24.3668	21.412	19.4188	21.7347
ENSMUSG00000029461.18	chr7:100355842-100490863	Fam168a	protein_coding	MGI:2442372	NA	2	1710.88	-0.305346	0.0765577	-3.98845	6.65071e-05	0.00215463	11.1781	9.61921	9.34328	7.8367	8.4862	7.98476
ENSMUSG00000004798.15	chr11:61666475-61745899	Ulk2	protein_coding	MGI:1352758	NA	2	3970.57	-0.286716	0.0718949	-3.98799	6.66362e-05	0.00215463	28.7925	25.6048	25.5	20.927	23.0756	21.3731
ENSMUSG00000039178.10	chr5:53966948-54061307	Tbc1d19	protein_coding	MGI:1914499	NA	2	464.813	-0.510931	0.128195	-3.98558	6.73158e-05	0.00217066	9.33268	7.17008	7.71808	5.27565	5.7953	5.85871
ENSMUSG00000056569.12	chr1:170978280-170988699	Mpz	protein_coding	MGI:103177	NA	2	741.898	1.32026	0.331381	3.98413	6.77285e-05	0.00217801	3.51326	2.8438	10.4941	7.37011	6.00798	37.2276
ENSMUSG00000057738.15	chr2:29855572-29921463	Sptan1	protein_coding	MGI:98386	ncRNA_host	2	2466	0.428792	0.107789	3.97806	6.94801e-05	0.00222827	6.6995	7.32546	9.15487	10.7687	8.36761	11.9736
ENSMUSG00000058799.17	chr10:111309084-111334011	Nap1l1	protein_coding	MGI:1855693	ncRNA_host	2	1992.24	-0.390597	0.0982914	-3.97386	7.07158e-05	0.00226176	18.3088	17.3353	18.1882	13.5088	14.1675	13.4826
ENSMUSG00000059447.14	chr5:30360246-30389591	Hadhb	protein_coding	MGI:2136381	ncRNA_host	2	9649	0.563676	0.141878	3.97295	7.09879e-05	0.00226432	105.998	126.26	170.006	179.263	200.83	203.971
ENSMUSG00000038583.14	chr10:53213763-53222083	Pln	protein_coding	MGI:97622	NA	2	102.686	1.62794	0.410343	3.96728	7.2699e-05	0.00231265	0.182865	0.457251	1.98214	1.49882	2.43532	1.27271
ENSMUSG00000040128.10	chr4:33245423-33290163	Pnrc1	protein_coding	MGI:1917838	NA	2	4312.9	-0.814721	0.205433	-3.96588	7.31245e-05	0.00231993	86.9851	60.7365	96.0527	32.7934	56.8964	47.9541
ENSMUSG00000034127.16	chr10:115652737-115685798	Tspan8	protein_coding	MGI:2384918	NA	2	1353.2	-0.821002	0.207307	-3.96032	7.48504e-05	0.00236832	31.0658	34.8373	44.8928	20.4714	20.213	21.7631
ENSMUSG00000009470.18	chr13:98975527-99062892	Tnpo1	protein_coding	MGI:2681523	NA	2	1316.78	-0.377738	0.0954085	-3.95917	7.52119e-05	0.0023734	6.01617	5.29893	5.67947	3.77979	3.7126	5.86065
ENSMUSG00000024068.9	chr17:74645982-74698110	Spast	protein_coding	MGI:1858896	NA	2	1540.76	-0.316661	0.0800947	-3.95359	7.69884e-05	0.00242298	10.264	10.812	9.73919	8.50874	8.3697	7.87449
ENSMUSG00000037826.6	chr6:57483487-57512453	Ppm1k	protein_coding	MGI:2442111	NA	2	516.098	0.522791	0.132409	3.94831	7.87038e-05	0.00247038	2.49664	2.14548	3.34005	3.39264	3.20454	4.92795
ENSMUSG00000054455.6	chr2:173579304-173626132	Vapb	protein_coding	MGI:1928744	overlapping_locus	2	5731.01	-0.244506	0.0619411	-3.94741	7.90028e-05	0.00247319	30.3676	33.1417	29.9742	26.4	28.7004	23.8917
ENSMUSG00000042529.15	chr11:60913390-60961957	Kcnj12	protein_coding	MGI:108495	NA	1	1257.11	-0.398291	0.101036	-3.94207	8.07799e-05	0.00252213	20.8597	19.0143	16.5494	13.8313	14.5745	14.17
ENSMUSG00000001248.16	chr7:30829552-30855321	Gramd1a	protein_coding	MGI:105490	NA	2	851.464	0.641367	0.162768	3.94038	8.1352e-05	0.00253329	6.4	6.85922	7.83865	9.97483	8.88419	14.4689
ENSMUSG00000050071.9	chrX:135114721-135116262	Bex1	protein_coding	MGI:1328321	NA	2	345.921	-0.93719	0.237914	-3.9392	8.17528e-05	0.00253907	16.4873	26.9752	18.3739	9.36108	10.2247	12.1643
ENSMUSG00000003380.12	chr7:24669177-24672179	Rabac1	protein_coding	MGI:1201692	ncRNA_host	2	3005.61	-0.328586	0.0834783	-3.93619	8.27862e-05	0.00256442	107.75	104.75	95.2763	83.6534	86.5723	74.9894
ENSMUSG00000028041.18	chr3:89245849-89257303	Adam15	protein_coding	MGI:1333882	NA	2	797.99	0.516377	0.131222	3.93514	8.3147e-05	0.00256885	3.52516	4.33489	6.62125	6.95981	6.03289	7.19121
ENSMUSG00000043424.11	chr18:43608483-43610861	Eif3j2	protein_coding	MGI:3704486	ncRNA_host	2	1416.77	-0.427873	0.108761	-3.93407	8.35188e-05	0.0025736	25.7033	25.143	24.0784	19.413	17.7888	18.6395
ENSMUSG00000079477.10	chr6:87976088-88022252	Rab7	protein_coding	MGI:105068	NA	2	6510.59	-0.346313	0.0881533	-3.92853	8.54684e-05	0.00262682	109.178	109.605	87.2448	76.1758	89.7928	73.6858
ENSMUSG00000037234.18	chr8:26511449-26609252	Hook3	protein_coding	MGI:2443554	NA	2	3823.93	-0.52233	0.132989	-3.92761	8.57939e-05	0.00262997	10.9722	10.5104	8.55552	6.91309	6.42713	7.53658
ENSMUSG00000049550.18	chr5:123715858-123822681	Clip1	protein_coding	MGI:1928401	NA	2	11143.9	-0.332743	0.0847525	-3.92605	8.63523e-05	0.00263364	57.1715	47.1367	51.6466	40.0294	40.358	42.9698
ENSMUSG00000006362.17	chr8:123351880-123425848	Cbfa2t3	protein_coding	MGI:1338013	overlapping_locus	2	884.495	0.695207	0.177076	3.92603	8.63599e-05	0.00263364	3.27556	3.60045	3.15437	6.39685	5.73064	4.21205
ENSMUSG00000024766.16	chr19:33532560-33739351	Lipo3	protein_coding	MGI:2147592	ncRNA_host	2	52.1673	2.46458	0.627995	3.92451	8.69049e-05	0.00264343	0.130993	0.0868822	0.0925606	0.11448	0.759387	0.943344
ENSMUSG00000068284.15	chr16:43993609-44047828	Usf3	protein_coding	MGI:2685454	NA	2	2948.76	-0.331315	0.084572	-3.91754	8.94558e-05	0.00271403	10.2431	9.76183	8.08956	7.46886	7.75115	7.00429
ENSMUSG00000019088.15	chrX:73316823-73325943	Dnase1l1	protein_coding	MGI:109628	ncRNA_host	2	2070.88	-0.456901	0.116683	-3.91574	9.01289e-05	0.00272744	52.1458	47.5047	53.8547	37.2467	38.1298	36.5773
ENSMUSG00000006717.8	chr13:25001931-25015523	Acot13	protein_coding	MGI:1914084	NA	2	1583.13	0.30468	0.0778803	3.91216	9.14753e-05	0.0027611	69.5754	74.7835	66.0708	93.7724	96.3304	71.9642
ENSMUSG00000072501.6	chr15:66449409-66519825	Phf20l1	protein_coding	MGI:2444412	NA	2	2117.57	-0.479887	0.122745	-3.90963	9.24395e-05	0.00278309	7.44421	8.26428	6.77609	5.49477	5.10119	5.53924
ENSMUSG00000038871.6	chr6:34453142-34482548	Bpgm	protein_coding	MGI:1098242	NA	2	2290.12	-0.497896	0.127391	-3.90841	9.29043e-05	0.00278997	41.8621	39.3378	36.4846	27.501	32.5137	23.5685
ENSMUSG00000057003.13	chr11:67128855-67151272	Myh4	protein_coding	MGI:1339713	NA	2	1.53919e+06	-0.834748	0.214123	-3.89845	9.68113e-05	0.00289992	10692	10475.4	11351.5	4497.81	6720.2	7195.24
ENSMUSG00000054640.16	chr17:81680534-82045806	Slc8a1	protein_coding	MGI:107956	NA	2	733.238	-0.946977	0.243043	-3.89634	9.76555e-05	0.0029075	2.28561	3.30075	0.865772	1.04932	1.12025	0.7964
ENSMUSG00000031722.11	chr8:110301760-110305804	Hp	protein_coding	MGI:96211	NA	2	172.257	-3.78143	0.970541	-3.8962	9.77118e-05	0.0029075	2.54461	0.243784	8.59953	0.0254937	0.0324319	5.43707
ENSMUSG00000025161.17	chr11:120839306-120851694	Slc16a3	protein_coding	MGI:1933438	NA	2	7964.26	-0.734528	0.188562	-3.89543	9.8026e-05	0.0029075	98.8581	74.6427	48.093	42.2781	52.4119	34.5965
ENSMUSG00000063684.10	chr2:108779151-108780578	Hadhb-ps	processed_pseudogene	MGI:3651143	NA	2	234.818	0.683371	0.175432	3.89537	9.805e-05	0.0029075	4.38101	4.44767	4.69509	6.76647	7.22195	7.68158
ENSMUSG00000032096.17	chr9:44652861-44679142	Arcn1	protein_coding	MGI:2387591	NA	2	2429.29	-0.331964	0.085252	-3.89392	9.86372e-05	0.00291758	24.6458	24.5903	23.1146	19.1477	19.7923	18.5137
ENSMUSG00000033191.15	chr4:118328388-118347258	Tie1	protein_coding	MGI:99906	NA	2	1093.38	0.674515	0.173343	3.89122	9.97402e-05	0.00293957	5.45874	6.91855	7.10053	11.4077	10.0209	9.47971
ENSMUSG00000030105.9	chr6:108760060-108802239	Arl8b	protein_coding	MGI:1914416	overlapping_locus	2	3240.92	-0.318314	0.0818102	-3.89089	9.98785e-05	0.00293957	30.0303	33.0513	27.4477	27.3044	25.2986	20.3417
ENSMUSG00000036661.15	chr15:73384409-73444091	Dennd3	protein_coding	MGI:2146009	NA	2	210.807	0.785758	0.202035	3.88921	0.000100571	0.00295259	0.599196	1.04125	0.987928	1.79541	1.34187	1.3286
ENSMUSG00000046873.19	chrX:156318367-156381711	Mbtps2	protein_coding	MGI:2444506	overlapping_locus	2	497.975	-0.411271	0.105847	-3.88551	0.000102114	0.00299044	2.69927	2.57773	2.67812	2.0702	2.10753	1.82612
ENSMUSG00000006740.15	chr18:6201002-6242174	Kif5b	protein_coding	MGI:1098268	NA	2	4188.18	-0.431831	0.111485	-3.87345	0.000107304	0.00313194	27.1199	29.5546	24.0979	20.2409	17.6483	22.1565
ENSMUSG00000025486.18	chr7:140443579-140462222	Sirt3	protein_coding	MGI:1927665	NA	2	577.168	0.486927	0.125721	3.87306	0.000107476	0.00313194	9.81833	9.754	9.01904	13.792	15.0115	11.5194
ENSMUSG00000068290.12	chr2:130495880-130506579	Ddrgk1	protein_coding	MGI:1924256	NA	1	2162.5	-0.408492	0.105488	-3.87242	0.000107762	0.00313252	40.672	46.0037	43.5955	30.7731	38.6962	28.9022
ENSMUSG00000019923.15	chr10:72490677-72510796	Zwint	protein_coding	MGI:1289227	NA	2	937.376	-0.458428	0.118434	-3.87075	0.000108499	0.00314621	11.5397	10.6857	9.32293	6.68276	8.17989	7.98343
ENSMUSG00000097286.3	chr15:54815466-54828038	Gm26684	lncRNA	MGI:5477178	NA	2	55.0302	2.36609	0.611557	3.86897	0.000109298	0.00316161	0.0681251	0.044055	0.177308	0.488348	0.342861	0.384628
ENSMUSG00000016664.17	chr15:83259808-83348807	Pacsin2	protein_coding	MGI:1345153	NA	2	1898.03	0.311059	0.0804515	3.86641	0.00011045	0.00318711	14.8343	13.1359	12.8163	17.3807	17.8173	15.4105
ENSMUSG00000014867.10	chr2:26810052-26823940	Surf4	protein_coding	MGI:98445	NA	2	3283.34	-0.378354	0.0979018	-3.86463	0.000111258	0.00320259	41.5951	41.3672	39.8239	29.7494	34.5041	30.2031
ENSMUSG00000111399.2	chr9:103289557-103300399	Gm47328	lncRNA	MGI:6096215	NA	2	19.5743	1.92964	0.499711	3.86152	0.000112683	0.00323572	0.451812	0.779139	0.553374	3.36098	2.91524	0.973976
ENSMUSG00000024440.14	chr18:38400142-38417455	Pcdh12	protein_coding	MGI:1855700	NA	2	153.574	0.854812	0.221837	3.85334	0.00011652	0.00333778	0.956528	1.19045	0.801292	1.76484	2.5386	1.15605
ENSMUSG00000019763.12	chr10:4351915-4382388	Rmnd1	protein_coding	MGI:1913334	NA	1	952.981	0.567781	0.147372	3.85271	0.000116815	0.00333815	7.59598	7.83173	8.51588	12.3285	12.9523	10.3967
ENSMUSG00000038530.12	chr1:169569046-169575211	Rgs4	protein_coding	MGI:108409	NA	2	251.677	0.855234	0.222164	3.84956	0.000118329	0.00337324	2.1272	3.06185	3.29873	6.76581	5.38389	3.37054
ENSMUSG00000041992.10	chr12:117480099-117723472	Rapgef5	protein_coding	MGI:2444365	ncRNA_host	2	331.797	0.678671	0.176335	3.84877	0.000118714	0.00337604	0.809698	1.08782	1.2185	1.89484	1.63942	1.4188
ENSMUSG00000020265.17	chr10:77441931-77454165	Sumo3	protein_coding	MGI:1336201	overlapping_locus	2	881.218	-0.399296	0.103773	-3.84777	0.000119196	0.00337883	9.56664	10.8398	8.99044	7.15941	7.3361	7.75164
ENSMUSG00000023232.18	chr4:130147288-130172998	Serinc2	protein_coding	MGI:1919132	NA	2	1383.68	-0.555891	0.144485	-3.84739	0.000119384	0.00337883	33.1345	20.1658	25.7006	14.8305	15.9356	23.1015
ENSMUSG00000026103.15	chr1:52202607-52272391	Gls	protein_coding	MGI:95752	NA	2	1924.56	-0.465457	0.121019	-3.84614	0.000119995	0.00338799	9.33935	10.4125	7.19305	6.7255	7.74007	5.07394
ENSMUSG00000059734.8	chr19:3958863-3962774	Ndufs8	protein_coding	MGI:2385079	NA	2	3695.54	0.306143	0.0796284	3.84464	0.000120727	0.00339509	88.0473	101.156	94.0783	124.51	134.41	94.6917
ENSMUSG00000023010.16	chr15:99290763-99307930	Tmbim6	protein_coding	MGI:99682	NA	2	6228.62	-0.275961	0.0717817	-3.84445	0.000120822	0.00339509	59.0192	58.2019	61.2867	48.0729	47.0039	52.4654
ENSMUSG00000037270.19	chr3:36917255-37107182	4932438A13Rik	protein_coding	MGI:2444631	NA	2	1972.27	-0.540487	0.14062	-3.84361	0.000121238	0.0033987	5.34526	5.1686	4.63717	3.66984	3.11507	3.63084
ENSMUSG00000026083.13	chr1:38037091-38094660	Eif5b	protein_coding	MGI:2441772	NA	2	4136.89	-0.259192	0.0675268	-3.83835	0.000123863	0.00346322	22.7496	21.526	18.9688	17.4895	18.489	16.7333
ENSMUSG00000032563.17	chr9:104930438-104957087	Mrpl3	protein_coding	MGI:2137204	overlapping_locus	1	1182.07	0.501329	0.130628	3.83783	0.000124127	0.00346322	5.88711	6.4154	7.01601	9.63854	9.89618	7.95494
ENSMUSG00000026640.13	chr1:194302133-194499177	Plxna2	protein_coding	MGI:107684	overlapping_locus	2	952.211	0.712952	0.185802	3.83716	0.000124463	0.00346322	0.944458	1.19379	1.84501	2.50536	1.65651	2.14544
ENSMUSG00000078941.10	chr13:100787487-100802867	Ak6	protein_coding	MGI:5510732	overlapping_locus	2	853.313	-0.351747	0.091689	-3.8363	0.000124901	0.00346322	15.5655	15.8172	13.5605	11.3632	13.1671	10.63
ENSMUSG00000003559.9	chr19:46695897-46729538	As3mt	protein_coding	MGI:1929882	NA	2	633.355	0.542627	0.141453	3.83609	0.000125007	0.00346322	6.59713	6.85304	4.54986	9.48366	8.74039	7.71057
ENSMUSG00000031805.18	chr8:72128940-72143219	Jak3	protein_coding	MGI:99928	overlapping_locus	2	184.355	0.903068	0.235496	3.83475	0.000125693	0.00347408	1.08451	1.13966	1.41823	2.53945	2.39668	1.92041
ENSMUSG00000042045.7	chr9:53757448-53761844	Sln	protein_coding	MGI:1913652	NA	2	129.712	1.36821	0.356896	3.83364	0.000126262	0.00348164	0.191397	0.462084	7.10297	1.70854	1.62027	4.78613
ENSMUSG00000020386.6	chr11:51654514-51682752	Sar1b	protein_coding	MGI:1913647	NA	2	8217.65	-0.524569	0.136964	-3.82999	0.000128151	0.00352549	292.624	274.01	278.834	178.126	228.72	182.559
ENSMUSG00000042460.6	chr6:7844842-7875687	C1galt1	protein_coding	MGI:2151071	overlapping_locus	2	689.762	-0.382463	0.0998842	-3.82906	0.000128632	0.00353051	5.20093	5.16996	4.25515	3.75691	3.57811	3.85115
ENSMUSG00000056328.15	chr11:67090878-67115401	Myh1	protein_coding	MGI:1339711	NA	2	327405	0.924487	0.241665	3.8255	0.000130509	0.00357369	1431.22	2264.63	535.812	3558.13	2569.03	1420.63
ENSMUSG00000020577.18	chr12:36064556-36092499	Tspan13	protein_coding	MGI:1913359	NA	2	609.496	0.689893	0.180377	3.82473	0.000130914	0.00357403	6.93363	8.63356	8.13006	16.2514	14.5688	8.47828
ENSMUSG00000021281.16	chr12:111408903-111421452	Tnfaip2	protein_coding	MGI:104960	NA	2	1399.86	0.645978	0.168913	3.82433	0.000131126	0.00357403	14.6957	9.68579	10.6576	21.2743	17.6777	15.7778
ENSMUSG00000036309.15	chr11:52122822-52137685	Skp1	protein_coding	MGI:103575	overlapping_locus	2	3834.39	-0.273284	0.0715363	-3.82022	0.000133335	0.00362585	75.5723	71.7568	66.8971	61.194	58.7517	57.205
ENSMUSG00000037674.16	chr9:72439522-72530219	Rfx7	protein_coding	MGI:2442675	overlapping_locus	2	814.397	-0.458853	0.120348	-3.81272	0.000137446	0.00372904	2.83041	2.59037	2.10128	1.73266	1.79653	1.91553
ENSMUSG00000045667.15	chr11:72279990-72302539	Smtnl2	protein_coding	MGI:2442764	NA	2	5908.97	-0.680194	0.178473	-3.81119	0.0001383	0.00374362	111.894	78.121	52.1155	52.0184	44.0646	48.4648
ENSMUSG00000014956.16	chr5:32616187-32674777	Ppp1cb	protein_coding	MGI:104871	NA	2	11636.5	-0.29034	0.0762934	-3.80558	0.000141473	0.00382073	63.9511	74.2733	53.0203	60.0056	54.4326	42.2195
ENSMUSG00000052921.14	chr11:68833981-68848306	Arhgef15	protein_coding	MGI:3045246	NA	2	580.765	0.711566	0.187433	3.79637	0.000146828	0.00395631	3.52355	4.3799	4.7036	7.00873	7.92358	5.83973
ENSMUSG00000024695.17	chr19:12744384-12773490	Zfp91	protein_coding	MGI:104854	overlapping_locus	2	8725.37	-0.299699	0.0789594	-3.7956	0.000147284	0.00395956	72.4905	72.0365	49.2918	56.1549	58.0278	42.3447
ENSMUSG00000020935.9	chr11:102884873-102919159	Dcakd	protein_coding	MGI:1915337	ncRNA_host	2	320.489	0.790968	0.20846	3.79434	0.000148036	0.00397073	3.36194	4.73803	3.86209	9.91586	7.75539	4.08424
ENSMUSG00000030592.19	chr7:28702769-28824576	Ryr1	protein_coding	MGI:99659	ncRNA_host	2	177980	-0.395447	0.104335	-3.79015	0.000150554	0.00402912	416.659	416.348	465.363	288.795	315.852	389.677
ENSMUSG00000025809.16	chr8:129412135-129459681	Itgb1	protein_coding	MGI:96610	NA	2	5235.09	-0.333513	0.0880195	-3.78909	0.000151202	0.00403729	53.9229	60.8759	50.8258	45.0204	42.8476	43.3097
ENSMUSG00000022358.8	chr15:58039275-58078328	Fbxo32	protein_coding	MGI:1914981	NA	2	8565.68	-0.725779	0.191665	-3.7867	0.000152659	0.00406699	49.5338	62.3095	55.6416	37.6445	40.0311	26.0276
ENSMUSG00000032294.18	chr9:59563651-59586658	Pkm	protein_coding	MGI:97591	NA	2	99532.9	-0.397632	0.105094	-3.78357	0.000154597	0.00410936	1208.15	1076.72	903.85	868.133	917.002	649.033
ENSMUSG00000025651.15	chr9:108765701-108778691	Uqcrc1	protein_coding	MGI:107876	NA	2	24486.6	0.259574	0.0686852	3.77919	0.000157338	0.00417281	440.184	458.58	376.614	526.366	589.963	418.359
ENSMUSG00000021556.13	chr13:59782440-59823625	Golm1	protein_coding	MGI:1917329	NA	2	424.562	-1.07604	0.285063	-3.77473	0.000160179	0.00423865	6.66007	2.42879	6.00615	2.25815	2.21929	2.40926
ENSMUSG00000034903.19	chr2:64918683-65069747	Cobll1	protein_coding	MGI:2442894	NA	2	212.639	1.07229	0.284132	3.77393	0.000160696	0.00424281	0.374975	0.66228	0.892605	1.32517	1.67021	0.920091
ENSMUSG00000038462.4	chr13:30724291-30729345	Uqcrfs1	protein_coding	MGI:1913944	NA	2	12723	0.268793	0.0713005	3.76986	0.000163339	0.00429348	316.336	347.888	284.055	405.163	439.919	306.162
ENSMUSG00000030062.8	chr6:88061464-88082286	Rpn1	protein_coding	MGI:98084	NA	2	1384.36	-0.270156	0.0716623	-3.76985	0.000163343	0.00429348	18.97	13.878	12.7822	11.991	12.1146	13.2407
ENSMUSG00000022146.13	chr15:6843058-6904450	Osmr	protein_coding	MGI:1330819	NA	2	232.129	0.569407	0.15108	3.7689	0.000163971	0.0043004	0.891254	1.10914	1.47985	1.54347	1.47027	2.11653
ENSMUSG00000035227.8	chr7:99486776-99512578	Spcs2	protein_coding	MGI:1913874	NA	2	1442.17	-0.477881	0.12686	-3.767	0.000165218	0.00432352	14.8646	19.2311	15.803	11.3442	12.9124	11.4631
ENSMUSG00000001300.17	chr8:8667434-8711242	Efnb2	protein_coding	MGI:105097	NA	2	208.99	0.794233	0.210885	3.7662	0.000165752	0.00432789	1.6421	1.35234	1.50842	2.90436	2.72219	2.23026
ENSMUSG00000040723.15	chr1:165474085-165537326	Rcsd1	protein_coding	MGI:2676394	NA	2	3597.94	-0.472028	0.125518	-3.76065	0.000169471	0.00441468	25.6793	26.4635	19.9986	19.1796	16.0951	16.5177
ENSMUSG00000020173.18	chr11:12186608-12414960	Cobl	protein_coding	MGI:105056	NA	2	1181.47	-0.351871	0.0935794	-3.76013	0.000169824	0.00441468	7.07883	7.34737	8.55775	6.11674	6.18899	5.67978
ENSMUSG00000089872.11	chr1:190432399-190643967	Rps6kc1	protein_coding	MGI:2443419	NA	1	601.398	-0.579862	0.154319	-3.75756	0.000171577	0.00445045	2.60548	3.25018	5.1172	2.0143	2.09695	3.09558
ENSMUSG00000006057.16	chr11:95959678-95966496	Atp5g1	protein_coding	MGI:107653	NA	2	13901.5	0.382406	0.101829	3.75538	0.000173078	0.00447952	87.1207	96.9494	87.7525	123.104	127.796	104.048
ENSMUSG00000023572.17	chr2:120838884-120847385	Ccndbp1	protein_coding	MGI:109595	NA	2	778.924	-0.577353	0.153785	-3.75429	0.000173837	0.00448153	14.2959	13.8717	14.7018	11.094	10.1762	7.91944
ENSMUSG00000029992.15	chr6:87019828-87069179	Gfpt1	protein_coding	MGI:95698	NA	2	1267.79	-0.416782	0.111018	-3.75417	0.000173916	0.00448153	7.0057	7.7882	7.68958	5.68524	5.61758	5.52416
ENSMUSG00000050974.5	chr12:14544562-14545160	Gm9847	processed_pseudogene	MGI:3642840	NA	2	32.6098	2.28445	0.608696	3.75302	0.00017472	0.00448153	0.33691	0.217873	2.06322	4.30618	1.95647	3.21639
ENSMUSG00000015755.17	chr10:7781417-7831994	Tab2	protein_coding	MGI:1915902	NA	2	5263.65	-0.332642	0.088643	-3.75261	0.000175006	0.00448153	41.7183	41.6309	32.9317	32.6025	33.9583	25.818
ENSMUSG00000022867.12	chr16:76810594-76913668	Usp25	protein_coding	MGI:1353655	NA	2	4380.37	-0.339537	0.090487	-3.75233	0.000175196	0.00448153	37.8949	38.7033	29.8681	28.8965	29.7826	25.1475
ENSMUSG00000000708.15	chr17:53873889-53979748	Kat2b	protein_coding	MGI:1343094	NA	1	2932.41	-0.34303	0.0914261	-3.75199	0.000175433	0.00448153	25.5334	27.1316	22.1636	21.4086	21.1427	16.6205
ENSMUSG00000062270.15	chr9:89973718-89996827	Morf4l1	protein_coding	MGI:1096551	NA	2	3891.77	-0.34704	0.092526	-3.75072	0.000176324	0.00449456	67.4412	72.2012	67.7757	53.6049	57.578	52.1258
ENSMUSG00000046785.9	chr9:111100997-111108161	Epm2aip1	protein_coding	MGI:1925031	NA	2	1505.15	-0.415068	0.110684	-3.75004	0.000176807	0.00449713	10.5834	8.64574	8.62435	7.02858	6.84419	6.91749
ENSMUSG00000032418.16	chr9:86463424-86578006	Me1	protein_coding	MGI:97043	NA	2	5538.73	-0.599468	0.159917	-3.74863	0.000177806	0.00450111	61.5445	63.8058	50.8094	33.1437	43.6664	39.2307
ENSMUSG00000028496.18	chr4:87688162-87951601	Mllt3	protein_coding	MGI:1917372	NA	2	2984.34	-0.400856	0.106939	-3.74846	0.000177927	0.00450111	14.2047	14.3679	14.7891	11.9302	12.284	8.92667
ENSMUSG00000019782.11	chr10:33872551-33895620	Rwdd1	protein_coding	MGI:1913771	NA	2	1680.93	-0.34312	0.0915425	-3.7482	0.000178107	0.00450111	48.4407	45.3203	38.0497	33.3072	38.5702	31.5941
ENSMUSG00000063870.13	chr6:125072944-125107554	Chd4	protein_coding	MGI:1344380	ncRNA_host	2	4159.71	-0.283839	0.0757665	-3.74624	0.000179507	0.0045268	22.5381	22.9871	22.1342	18.0104	17.28	20.3682
ENSMUSG00000033065.15	chr15:97990470-98030332	Pfkm	protein_coding	MGI:97548	NA	2	122798	-0.330808	0.0883435	-3.74457	0.000180705	0.00454729	1657.18	1549.58	1211.19	1283.9	1333.04	914.92
ENSMUSG00000008226.15	chr2:73142945-73168162	Scrn3	protein_coding	MGI:1921866	NA	2	1489.41	-0.285315	0.07621	-3.7438	0.000181256	0.00455146	13.0348	12.2329	12.8207	10.6375	10.5361	10.1129
ENSMUSG00000015133.18	chr7:65876660-66038098	Lrrk1	protein_coding	MGI:2142227	ncRNA_host	2	134.431	0.925097	0.247278	3.74111	0.000183206	0.00459064	0.158141	0.409065	0.56103	0.712474	0.58267	0.668377
ENSMUSG00000057177.13	chr7:24927683-24937276	Gsk3a	protein_coding	MGI:2152453	NA	2	2819.24	-0.27341	0.0731193	-3.73923	0.000184586	0.00461543	48.7111	52.2985	46.7416	40.6893	44.7337	36.9456
ENSMUSG00000045671.18	chr11:19874375-19974026	Spred2	protein_coding	MGI:2150019	NA	2	195.358	0.602522	0.161163	3.7386	0.00018505	0.00461726	1.15781	1.61048	1.57193	2.39328	2.27783	1.93753
ENSMUSG00000030657.12	chr7:116980214-117272803	Xylt1	protein_coding	MGI:2451073	NA	2	317.715	-0.509909	0.136439	-3.73728	0.000186025	0.0046239	1.9465	1.62529	1.02076	1.19379	1.21264	0.764804
ENSMUSG00000074793.11	chr2:130969200-130988241	Hspa12b	protein_coding	MGI:1919880	NA	2	511.568	0.73127	0.195675	3.73717	0.0001861	0.0046239	3.36805	4.19082	5.11452	7.66638	5.98596	7.26898
ENSMUSG00000049940.8	chr3:41020761-41037481	Pgrmc2	protein_coding	MGI:1918054	NA	2	861.93	-0.30951	0.0828471	-3.73592	0.00018703	0.00463724	10.9059	10.7778	12.6587	8.89116	9.14573	9.64167
ENSMUSG00000021456.9	chr13:62984691-63006236	Fbp2	protein_coding	MGI:95491	NA	2	1015.5	-2.25342	0.603888	-3.73151	0.000190333	0.00470115	29.7081	55.2288	44.6099	4.93322	21.6817	3.87109
ENSMUSG00000026750.7	chr2:38478048-38534099	Psmb7	protein_coding	MGI:107637	ncRNA_host	2	4815.27	-0.288668	0.0773614	-3.73142	0.000190404	0.00470115	181.237	169.882	145.721	136.418	148.264	121.512
ENSMUSG00000027219.14	chr2:122256958-122291618	Slc28a2	protein_coding	MGI:1913105	overlapping_locus	2	339.206	0.656855	0.176076	3.73051	0.000191093	0.00470831	1.99028	2.45008	2.38627	3.63894	3.79997	3.33785
ENSMUSG00000005161.16	chr8:85696216-85701463	Prdx2	protein_coding	MGI:109486	NA	2	3113.3	0.330537	0.088648	3.72865	0.000192512	0.00473338	47.648	50.6905	47.4513	60.666	61.8011	60.9975
ENSMUSG00000021373.17	chr13:46655324-46803757	Cap2	protein_coding	MGI:1914502	ncRNA_host	2	9410.1	-0.377953	0.101394	-3.72758	0.000193329	0.00474358	103.924	106.541	78.3672	74.6452	68.8215	77.0193
ENSMUSG00000020400.18	chr11:54801611-54853743	Tnip1	protein_coding	MGI:1926194	NA	2	1172.57	-0.294874	0.0791587	-3.7251	0.000195238	0.00478048	14.415	13	14.0063	10.5013	10.9593	12.3538
ENSMUSG00000027984.9	chr3:131027068-131065750	Hadh	protein_coding	MGI:96009	NA	2	4686.61	0.514215	0.138066	3.72441	0.000195776	0.00478374	68.1346	76.4991	86.9564	111.157	121.785	96.8711
ENSMUSG00000028945.10	chr5:25007821-25047622	Rheb	protein_coding	MGI:97912	ncRNA_host	2	1981.69	-0.280556	0.0753482	-3.72346	0.000196509	0.00479174	45.6729	45.3307	42.2232	36.9037	38.7139	34.0879
ENSMUSG00000030672.13	chr7:126808062-126813470	Mylpf	protein_coding	MGI:97273	NA	2	143780	-0.520476	0.139854	-3.72157	0.000197984	0.00481775	6777.79	5630.9	6485.9	4015.56	4685.72	4457.21
ENSMUSG00000029454.16	chr5:121663101-121683968	Mapkapk5	protein_coding	MGI:1333110	overlapping_locus	1	1811	-0.262367	0.0705405	-3.71939	0.000199705	0.00484882	26.8528	28.1149	25.0122	22.9512	22.597	21.1024
ENSMUSG00000044934.14	chr13:64280832-64301016	Zfp367	protein_coding	MGI:2442266	NA	2	717.138	-0.590012	0.158652	-3.71891	0.000200082	0.00484882	5.91996	6.55605	5.76582	3.85371	5.2898	3.13337
ENSMUSG00000004936.9	chr9:64093052-64160913	Map2k1	protein_coding	MGI:1346866	NA	2	1729.53	-0.278858	0.0750143	-3.7174	0.000201283	0.00486791	29.5783	27.2896	26.4324	21.6433	24.1922	22.6587
ENSMUSG00000108621.2	chr7:39193826-39230013	Gm33989	lncRNA	MGI:5593148	NA	2	394.473	-0.455514	0.1226	-3.71546	0.000202836	0.00489545	1.05522	1.04133	1.10566	0.707832	0.793422	0.832134
ENSMUSG00000048376.7	chr13:95738311-95754995	F2r	protein_coding	MGI:101802	NA	2	307.841	1.09208	0.294034	3.71414	0.000203895	0.00491096	1.36112	2.03426	2.76922	5.33878	2.70889	4.67608
ENSMUSG00000004748.6	chr11:4041480-4045445	Mtfp1	protein_coding	MGI:1916686	NA	2	1361.57	0.562143	0.151384	3.71337	0.000204518	0.00491593	21.3943	23.3278	24.4614	35.9958	37.5658	29.215
ENSMUSG00000040423.12	chr1:160733988-160802548	Rc3h1	protein_coding	MGI:2685397	NA	1	854.555	-0.720904	0.194171	-3.71273	0.000205037	0.00491839	3.00781	4.2168	2.83102	1.83343	2.17082	2.05934
ENSMUSG00000049106.8	chr12:80382622-80483375	Dcaf5	protein_coding	MGI:2444785	ncRNA_host	2	1708.49	-0.311704	0.0839818	-3.71157	0.000205981	0.00493102	13.7636	11.9261	9.73907	9.95666	9.39242	8.94267
ENSMUSG00000021774.14	chr14:4137837-4186974	Ube2e1	protein_coding	MGI:107411	NA	2	1578.25	-0.38015	0.102468	-3.70996	0.000207294	0.00495241	40.7	36.9415	34.6132	29.5495	30.3131	26.4068
ENSMUSG00000108322.3	chr7:44122962-44135562	5430431A17Rik	lncRNA	MGI:1918618	NA	2	309.476	0.884384	0.238464	3.70867	0.00020835	0.00496758	5.49319	3.21401	7.96947	8.80949	8.87785	12.3452
ENSMUSG00000079941.2	chr13:21685199-21685588	Cox5b-ps	protein_coding	MGI:3649411	NA	2	197.472	0.734645	0.19829	3.7049	0.000211471	0.00503183	11.6428	16.7315	11.5665	20.2615	21.7023	24.1425
ENSMUSG00000059201.13	chr6:29060219-29073876	Lep	protein_coding	MGI:104663	NA	2	99.0043	-5.85145	1.58045	-3.7024	0.000213567	0.00507147	0.421188	0.0389105	4.03481	0.0122072	0	0.129709
ENSMUSG00000020671.10	chr12:3297428-3359969	Rab10	protein_coding	MGI:105066	NA	2	10125.4	-0.31091	0.0842444	-3.69057	0.000223748	0.00530255	141.72	110.495	110.183	90.9182	88.0251	112.931
ENSMUSG00000057522.16	chr11:95304906-95384232	Spop	protein_coding	MGI:1343085	NA	2	8003.18	-0.297454	0.0806465	-3.68837	0.000225695	0.00533797	98.9083	113.595	88.641	84.2058	90.4202	70.6578
ENSMUSG00000027206.14	chr2:125672224-125701059	Cops2	protein_coding	MGI:1330276	NA	2	2311.93	-0.313222	0.0849766	-3.68598	0.000227824	0.00537102	27.451	25.5569	26.8921	21.3771	20.8841	22.1435
ENSMUSG00000015217.12	chrX:70599524-70604282	Hmgb3	protein_coding	MGI:1098219	NA	2	177.079	0.814939	0.221103	3.68578	0.000228002	0.00537102	2.59454	2.63581	2.50131	4.48204	4.81341	4.20866
ENSMUSG00000005802.13	chr2:122523153-122544583	Slc30a4	protein_coding	MGI:1345282	NA	2	617.446	-0.350995	0.0952991	-3.68309	0.00023042	0.00541717	5.47595	4.56286	4.1763	3.56253	3.84799	3.65615
ENSMUSG00000006262.16	chr5:88868714-88912079	Mob1b	protein_coding	MGI:1915723	NA	2	895.384	-0.340609	0.0925601	-3.67987	0.000233356	0.00547529	4.94565	4.82222	3.35602	3.89476	3.67103	2.76195
ENSMUSG00000071655.13	chr19:8848923-8853227	Ubxn1	protein_coding	MGI:1289301	NA	2	3174.36	-0.3281	0.0892237	-3.67728	0.000235738	0.0055202	103.569	100.636	79.2871	73.6396	73.8919	76.5264
ENSMUSG00000000420.16	chr18:24338401-24419875	Galnt1	protein_coding	MGI:894693	overlapping_locus	2	2222.73	-0.282419	0.0768281	-3.67599	0.000236929	0.00553711	18.8042	16.4738	13.9732	13.8727	13.9581	12.4152
ENSMUSG00000029484.13	chr5:96941198-96993825	Anxa3	protein_coding	MGI:1201378	NA	2	354.467	0.679133	0.184817	3.67462	0.0002382	0.0055558	2.4249	2.3873	3.28028	4.56716	3.7551	4.6478
ENSMUSG00000035478.15	chr10:80228373-80235384	Mbd3	protein_coding	MGI:1333812	NA	2	2877.57	-0.329366	0.0896629	-3.67338	0.000239364	0.00557195	59.3393	61.6295	52.4172	42.5089	50.0672	44.9775
ENSMUSG00000020358.18	chr11:51490927-51497674	Hnrnpab	protein_coding	MGI:1330294	NA	2	3447.9	-0.251277	0.0684631	-3.67025	0.000242312	0.005623	51.7943	49.6003	46.3562	40.3395	44.1099	39.5412
ENSMUSG00000043085.15	chr4:141340687-141345944	Tmem82	protein_coding	MGI:2384869	NA	2	47.8699	2.26713	0.617741	3.67004	0.00024251	0.005623	0.103563	0.133944	0.116272	0.406207	0.828594	0.467765
ENSMUSG00000020741.18	chr11:74540321-74561673	Cluh	protein_coding	MGI:1921398	NA	2	6060.55	0.440327	0.120383	3.65772	0.000254465	0.00588863	33.1872	31.1052	33.3371	44.9745	49.8021	38.4322
ENSMUSG00000027374.13	chr2:127429142-127448749	Mrps5	protein_coding	MGI:1924971	NA	2	1196.08	0.277217	0.0758453	3.65503	0.000257154	0.00593921	9.18228	9.32184	8.41769	10.7654	11.645	10.1841
ENSMUSG00000025907.15	chr1:6276421-6346872	Rb1cc1	protein_coding	MGI:1341850	NA	2	2534.46	-0.352676	0.0965196	-3.65393	0.000258254	0.00595296	12.6596	12.9558	11.5628	10.0152	8.8411	10.3014
ENSMUSG00000018861.9	chr11:115158850-115167876	Fdxr	protein_coding	MGI:104724	NA	2	131.63	0.719761	0.197039	3.65288	0.000259312	0.00596568	1.18669	1.27126	1.7067	1.99899	2.36668	2.39205
ENSMUSG00000025351.15	chr10:128736858-128748691	Cd63	protein_coding	MGI:99529	NA	2	2277.17	-0.361969	0.0991136	-3.65206	0.000260144	0.00597305	53.3119	51.8263	51.2171	41.1497	38.5235	41.9732
ENSMUSG00000030704.15	chr7:100256617-100290475	Rab6a	protein_coding	MGI:894313	NA	2	2521.52	-0.308136	0.0843885	-3.65139	0.000260822	0.00597305	29.3068	32.4584	27.799	23.1624	23.9023	25.2237
ENSMUSG00000024049.16	chr17:71309628-71433851	Myom1	protein_coding	MGI:1341430	NA	2	47120.9	-0.294792	0.0807542	-3.65048	0.000261748	0.00597305	220.298	254.504	256.564	185.875	199.36	211.237
ENSMUSG00000028403.16	chr4:82716975-82778195	Zdhhc21	protein_coding	MGI:1915518	NA	2	575.674	-0.44344	0.121477	-3.6504	0.000261835	0.00597305	3.0645	2.60936	2.1142	1.90174	1.95406	1.80673
ENSMUSG00000043155.5	chr4:116677101-116678904	Hpdl	protein_coding	MGI:2444646	NA	2	49.0634	1.04655	0.286721	3.65008	0.000262162	0.00597305	0.839008	0.626968	0.719325	1.52061	1.73234	1.2919
ENSMUSG00000094483.3	chr11:6417599-6425917	Purb	protein_coding	MGI:1338779	ncRNA_host	2	1446.27	-0.445927	0.122282	-3.6467	0.000265628	0.00604036	7.63547	7.62944	6.13552	5.80258	4.89614	4.97177
ENSMUSG00000021737.5	chr14:8348779-8357589	Psmd6	protein_coding	MGI:1913663	NA	2	2589.23	-0.350363	0.0960904	-3.64618	0.000266171	0.00604106	81.4076	75.3364	70.2583	58.0049	64.0086	55.8534
ENSMUSG00000024962.14	chr19:6959841-6965019	Vegfb	protein_coding	MGI:106199	NA	2	2853.67	0.426097	0.116979	3.64252	0.000269985	0.00611586	66.8365	73.1144	67.6786	99.2729	108.705	74.5933
ENSMUSG00000041733.11	chr5:115417725-115435031	Coq5	protein_coding	MGI:1098643	NA	2	3030.14	0.384569	0.10565	3.64002	0.000272613	0.00616355	51.6164	48.8195	46.8532	66.4091	70.4064	56.047
ENSMUSG00000036099.17	chr10:93775027-93871679	Vezt	protein_coding	MGI:2143698	ncRNA_host	1	1127.83	-0.408188	0.112176	-3.63882	0.000273892	0.00618064	2.80381	3.21129	2.58647	1.96494	2.23702	2.27194
ENSMUSG00000006154.14	chr7:4463673-4483486	Eps8l1	protein_coding	MGI:1914675	NA	2	37.6656	7.13921	1.96277	3.6373	0.000275507	0.00620521	0.00873331	0	0.0106965	0.432321	1.39748	0.258192
ENSMUSG00000036561.10	chr15:89095756-89170467	Ppp6r2	protein_coding	MGI:1918724	NA	2	2213.82	-0.340724	0.0936899	-3.63672	0.000276129	0.00620737	20.141	20.1745	14.1207	14.9097	14.5169	13.0697
ENSMUSG00000008035.13	chrX:10581252-10585929	Mid1ip1	protein_coding	MGI:1915291	NA	2	1098.53	1.05677	0.290665	3.63572	0.000277209	0.00621981	10.0051	6.86872	16.9148	21.9722	11.6263	35.8934
ENSMUSG00000056770.16	chr12:108072690-108145573	Setd3	protein_coding	MGI:1289184	NA	2	3936.68	-0.298409	0.0822371	-3.62864	0.000284919	0.0063793	37.9772	35.4135	28.3524	27.8338	29.2542	25.1301
ENSMUSG00000030499.10	chr7:34338439-34356157	Kctd15	protein_coding	MGI:2385276	NA	2	1882.9	-0.414202	0.114162	-3.62821	0.000285398	0.0063793	23.1905	18.5381	17.7376	14.9358	16.4012	13.0369
ENSMUSG00000031634.14	chr8:46428565-46449995	Ufsp2	protein_coding	MGI:1913679	NA	2	648.353	-0.400356	0.110369	-3.62743	0.000286251	0.00638626	14.4372	14.9559	12.5781	12.0532	11.9022	8.25241
ENSMUSG00000040287.10	chr10:127337555-127344692	Stac3	protein_coding	MGI:3606571	NA	2	5561.42	-0.31213	0.0860869	-3.62576	0.000288115	0.00641571	134.944	136.024	121.678	102.839	107.104	106.204
ENSMUSG00000050965.15	chr11:107824213-108234754	Prkca	protein_coding	MGI:97595	NA	2	2553.59	-0.499978	0.138132	-3.61957	0.000295094	0.00654446	12.282	17.2759	9.7858	10.4361	9.2679	7.70987
ENSMUSG00000037331.16	chr11:57899890-57952860	Larp1	protein_coding	MGI:1890165	NA	2	5187.12	-0.235831	0.0651591	-3.61932	0.000295384	0.00654446	32.7052	30.427	28.5075	27.0665	25.1539	25.5082
ENSMUSG00000025862.15	chrX:41238194-41366062	Stag2	protein_coding	MGI:1098583	NA	2	1800.59	-0.506928	0.140068	-3.61916	0.00029556	0.00654446	10.9366	10.1186	9.7731	6.87247	6.68898	8.22508
ENSMUSG00000042742.8	chr6:13625672-13677965	Bmt2	protein_coding	MGI:2141466	NA	2	343.938	-0.506122	0.139872	-3.61847	0.00029635	0.00654966	2.88453	2.94287	2.18888	1.80288	2.31666	1.51179
ENSMUSG00000024462.18	chr17:37356858-37385959	Gabbr1	protein_coding	MGI:1860139	NA	2	279.185	0.734279	0.202953	3.61797	0.000296921	0.00655003	0.847371	1.0216	1.60729	2.03863	1.47865	2.11997
ENSMUSG00000059890.17	chr9:44834425-44876898	Ube4a	protein_coding	MGI:2154580	NA	2	1108.94	-0.457508	0.126571	-3.61463	0.000300782	0.00661225	5.85175	4.678	5.7652	3.65875	4.04554	4.13655
ENSMUSG00000054404.14	chr11:82842175-82855666	Slfn5	protein_coding	MGI:1329004	NA	2	1206.43	0.59066	0.163412	3.61456	0.000300862	0.00661225	3.68463	5.71452	6.0465	8.48501	6.42631	8.11002
ENSMUSG00000058655.10	chr15:101982208-102005608	Eif4b	protein_coding	MGI:95304	NA	2	7950.1	-0.426528	0.118056	-3.61294	0.000302741	0.00664117	73.1663	69.9822	83.2865	54.0422	54.8123	59.7126
ENSMUSG00000026384.14	chr1:119580197-119765343	Ptpn4	protein_coding	MGI:1099792	overlapping_locus	1	987.077	-0.569852	0.157751	-3.61235	0.000303433	0.006644	5.5457	4.80504	2.3635	2.85027	3.40488	1.95778
ENSMUSG00000024597.12	chr18:58011750-58079893	Slc12a2	protein_coding	MGI:101924	NA	2	2780.65	-0.519995	0.143994	-3.61123	0.000304749	0.00666045	21.3107	20.4632	13.4865	13.6518	10.6088	13.8262
ENSMUSG00000024617.17	chr18:61058690-61121224	Camk2a	protein_coding	MGI:88256	ncRNA_host	2	10122.5	-0.487429	0.134995	-3.61073	0.00030534	0.00666104	97.6426	62.2506	69.4665	46.2516	50.2656	66.5247
ENSMUSG00000063884.7	chr6:71857624-71885734	Ptcd3	protein_coding	MGI:1917206	ncRNA_host	2	1672.97	0.344049	0.0953827	3.60704	0.000309713	0.00674397	21.1873	21.0577	20.8179	28.3545	27.9762	23.9787
ENSMUSG00000024065.9	chr17:74111836-74139089	Ehd3	protein_coding	MGI:1928900	NA	2	97.5627	-0.806681	0.223902	-3.60283	0.000314773	0.00683508	1.06172	1.35535	1.7648	0.660189	0.669042	1.06158
ENSMUSG00000039914.7	chr10:128198969-128204866	Coq10a	protein_coding	MGI:2684847	NA	2	7233.32	0.364097	0.101075	3.60223	0.000315503	0.00683508	120.758	136.06	134.317	186.62	180.135	140.716
ENSMUSG00000031948.15	chr8:112720075-112737955	Kars	protein_coding	MGI:1934754	NA	2	3028.94	-0.232235	0.0644717	-3.60212	0.000315634	0.00683508	48.3957	49.8782	52.0394	41.7419	44.5867	41.6258
ENSMUSG00000048546.9	chr15:81732473-81742723	Tob2	protein_coding	MGI:1888525	NA	2	4417.33	-0.798176	0.221711	-3.60007	0.000318136	0.00687662	11.9144	24.8464	21.579	10.7539	9.74429	12.2057
ENSMUSG00000043924.17	chr4:135096887-135125538	Ncmap	protein_coding	MGI:2444888	NA	2	24.0489	2.29459	0.637881	3.59721	0.000321655	0.00693998	0.0679645	0.0586016	0.194232	0.312541	0.257271	1.06047
ENSMUSG00000046603.17	chr9:122634604-122665399	Tcaim	protein_coding	MGI:1196217	ncRNA_host	2	1059.95	0.333248	0.0926673	3.59618	0.000322927	0.00695471	10.6844	13.9022	9.72565	15.7563	16.0456	11.5212
ENSMUSG00000022151.17	chr15:5215006-5247817	Ttc33	protein_coding	MGI:1914765	overlapping_locus	2	1007.14	-0.287611	0.079994	-3.59541	0.000323877	0.00695734	18.6835	18.9051	18.9123	15.9191	14.8094	15.6019
ENSMUSG00000017300.10	chr2:164619081-164621887	Tnnc2	protein_coding	MGI:98780	NA	2	180776	-0.327336	0.0910497	-3.59513	0.000324228	0.00695734	10034.1	8469.71	9071.09	6706.86	7640.67	7608.51
ENSMUSG00000022336.4	chr15:43113454-43146115	Eif3e	protein_coding	MGI:99257	NA	2	2472.3	-0.350136	0.097426	-3.59386	0.00032581	0.0069786	56.3326	56.8618	56.5	43.1618	47.563	42.4648
ENSMUSG00000048807.3	chr11:3857021-3864664	Slc35e4	protein_coding	MGI:2144150	NA	2	772.774	-0.555281	0.154584	-3.59209	0.000328036	0.00701355	11.7607	10.1831	9.24985	7.56568	6.47032	7.11172
ENSMUSG00000026915.17	chr2:37373240-37593871	Strbp	protein_coding	MGI:104626	ncRNA_host	2	602.564	-0.424752	0.118296	-3.5906	0.000329914	0.00701544	1.42283	1.23617	1.43729	0.994101	1.03242	1.02491
ENSMUSG00000058709.12	chr7:26858083-26866227	Egln2	protein_coding	MGI:1932287	NA	2	2786.01	-0.314502	0.0875916	-3.59055	0.000329975	0.00701544	41.8034	35.8735	37.7933	29.2888	32.5163	30.9302
ENSMUSG00000052299.10	chr16:87173539-87229500	Ltn1	protein_coding	MGI:1926163	ncRNA_host	2	1070.96	-0.338068	0.0941605	-3.59033	0.000330254	0.00701544	5.18416	5.4516	5.77837	4.33231	4.07707	4.61126
ENSMUSG00000022475.20	chr15:97690545-97742383	Hdac7	protein_coding	MGI:1891835	NA	2	535.709	0.769643	0.214378	3.59013	0.000330515	0.00701544	2.79202	3.11693	3.71361	6.29646	5.04169	5.02622
ENSMUSG00000068551.13	chr6:48404631-48422759	Zfp467	protein_coding	MGI:1916160	NA	2	456.918	-0.536949	0.149582	-3.58967	0.000331097	0.00701544	5.46376	3.86868	5.41413	3.41599	2.94484	3.78867
ENSMUSG00000051790.16	chr11:69713948-69728610	Nlgn2	protein_coding	MGI:2681835	NA	2	161.468	0.620726	0.173089	3.58617	0.000335569	0.00708306	0.580114	0.83366	0.877381	1.22686	1.07075	1.18559
ENSMUSG00000079484.13	chr2:30156541-30172161	Phyhd1	protein_coding	MGI:3612860	overlapping_locus	2	303.96	0.87063	0.242777	3.58613	0.000335616	0.00708306	3.43168	1.73552	7.17354	4.28441	4.71802	14.0435
ENSMUSG00000020516.16	chr11:86389697-86435631	Rps6kb1	protein_coding	MGI:1270849	NA	2	1089.59	-0.384212	0.107149	-3.58577	0.000336088	0.00708306	6.27291	5.31912	4.98721	4.34138	4.41516	3.88996
ENSMUSG00000027931.13	chr3:90357898-90373173	Npr1	protein_coding	MGI:97371	NA	2	533.503	0.436083	0.121666	3.58425	0.000338047	0.00711165	3.53457	4.3314	3.93622	5.12769	5.01736	5.86747
ENSMUSG00000014606.15	chr11:70535022-70538305	Slc25a11	protein_coding	MGI:1915113	NA	2	8286.81	0.299726	0.0836485	3.58316	0.000339459	0.00712864	132.131	156.295	130.098	193.824	194.981	132.579
ENSMUSG00000040694.5	chr17:48726259-48739958	Apobec2	protein_coding	MGI:1343178	NA	2	7030.92	-0.321487	0.089748	-3.58211	0.000340835	0.00714482	165.447	156.901	181.821	139.903	128.681	134.494
ENSMUSG00000040782.13	chr1:159059890-159175210	Cop1	protein_coding	MGI:1347046	ncRNA_host	2	2483.86	-0.306807	0.0856792	-3.58087	0.000342447	0.00716588	19.1002	20.3806	17.1	15.9613	16.3774	13.4905
ENSMUSG00000019846.12	chr10:38841511-38986184	Lama4	protein_coding	MGI:109321	NA	2	605.422	0.850305	0.237497	3.58027	0.000343242	0.00716981	1.96102	1.89233	4.07289	5.45138	3.35119	4.63085
ENSMUSG00000034714.10	chr11:114566257-114611803	Ttyh2	protein_coding	MGI:2157091	NA	2	343.743	-0.625772	0.174869	-3.57851	0.000345554	0.00720535	4.76322	4.56078	4.16474	3.15367	3.01592	2.55976
ENSMUSG00000072704.7	chr6:133081872-133087862	Smim10l1	protein_coding	MGI:1914379	NA	2	4977.9	-0.282581	0.0790868	-3.57304	0.000352855	0.0073446	76.1883	66.926	55.4892	53.6742	56.7034	51.6355
ENSMUSG00000068270.16	chrX:6311908-6549502	Shroom4	protein_coding	MGI:2685570	NA	2	398.828	0.588762	0.164827	3.572	0.000354262	0.0073548	0.829509	1.38148	1.27345	1.9411	1.58955	1.62721
ENSMUSG00000020590.17	chr12:35097185-35197478	Snx13	protein_coding	MGI:2661416	NA	2	2293.46	-0.338188	0.094684	-3.57176	0.000354591	0.0073548	13.2664	11.8412	12.1007	10.9066	9.90714	8.69658
ENSMUSG00000025423.17	chr18:77152904-77241496	Pias2	protein_coding	MGI:1096566	NA	2	1273.76	-0.392802	0.110008	-3.57066	0.000356077	0.00737266	17.2019	15.0625	12.4207	11.1175	12.4369	10.2138
ENSMUSG00000020463.16	chr11:29122890-29170797	Ppp4r3b	protein_coding	MGI:2144474	NA	2	758.255	-0.370394	0.103841	-3.56695	0.000361163	0.00746487	5.81888	6.26343	5.10221	4.46148	4.43718	4.36358
ENSMUSG00000034981.10	chr5:91665474-91774753	Parm1	protein_coding	MGI:2443349	overlapping_locus	2	1235.27	-0.520101	0.145959	-3.56335	0.000366157	0.00755486	10.6718	9.71668	11.2967	7.12542	6.46959	8.54119
ENSMUSG00000036781.14	chr9:66853368-66856798	Rps27l	protein_coding	MGI:1915191	NA	2	906.55	-0.348597	0.0978969	-3.56086	0.000369638	0.00761339	55.4976	51.6144	44.0905	37.9552	45.223	35.2317
ENSMUSG00000026260.13	chr1:92366732-92401582	Ndufa10	protein_coding	MGI:1914523	ncRNA_host	2	7720.34	0.266552	0.0749267	3.5575	0.000374397	0.00768616	125.298	128.204	121.682	158.823	165.207	129.894
ENSMUSG00000025151.17	chrX:93579080-93585749	Maged1	protein_coding	MGI:1930187	NA	2	550.07	0.556477	0.156426	3.55745	0.000374474	0.00768616	3.38018	4.41033	8.29097	6.64723	5.85294	10.1562
ENSMUSG00000022698.18	chr16:43960193-43983729	Naa50	protein_coding	MGI:1919367	NA	2	8100.52	-0.436677	0.12284	-3.55484	0.000378216	0.00774949	78.3922	82.034	61.2683	48.7827	51.8055	63.9741
ENSMUSG00000042595.8	chrX:135950343-135983252	Fam199x	protein_coding	MGI:2384304	NA	2	190.348	-0.779186	0.219373	-3.55187	0.000382505	0.00782379	1.00309	1.2528	0.882338	0.547616	0.574266	0.703941
ENSMUSG00000028494.13	chr4:86566623-86588297	Plin2	protein_coding	MGI:87920	NA	2	895.96	0.462532	0.130331	3.54891	0.000386823	0.00789841	7.31214	6.93652	8.28722	9.88598	9.09125	12.2015
ENSMUSG00000021929.10	chr14:61602660-61677323	Kpna3	protein_coding	MGI:1100863	NA	2	5348.75	-0.257206	0.0725494	-3.54525	0.000392242	0.00799524	57.0239	52.91	51.4439	47.6342	44.1428	43.2553
ENSMUSG00000035642.17	chr7:97199538-97228704	Aamdc	protein_coding	MGI:1913523	NA	1	1549.69	-0.291523	0.0823044	-3.54201	0.000397096	0.00808021	41.4553	35.4211	38.8553	28.5459	32.4285	33.4604
ENSMUSG00000040957.16	chr18:11972277-12078687	Cables1	protein_coding	MGI:1927065	NA	2	93.097	1.20773	0.341063	3.54108	0.000398487	0.00809457	0.118278	0.385273	0.764571	0.831869	0.854752	0.882292
ENSMUSG00000031075.20	chr7:144142286-144305711	Ano1	protein_coding	MGI:2142149	NA	2	146.25	0.615446	0.173842	3.54027	0.000399722	0.00810084	0.894017	1.15628	0.827319	1.73316	1.64594	1.10128
ENSMUSG00000031708.18	chr8:84298327-84334600	Tecr	protein_coding	MGI:1915408	NA	2	7617.95	-0.409197	0.115593	-3.53997	0.000400168	0.00810084	162.174	118.633	173.652	103.025	99.7881	140.6
ENSMUSG00000026956.16	chr2:25249901-25255694	Uap1l1	protein_coding	MGI:2443318	NA	2	135.349	0.825845	0.233451	3.53755	0.000403858	0.00815505	0.830338	0.694577	1.09288	1.74995	1.61208	1.32053
ENSMUSG00000017781.18	chr11:75478923-75519630	Pitpna	protein_coding	MGI:99887	NA	2	3222.68	-0.395579	0.11183	-3.53731	0.000404229	0.00815505	26.8718	28.4671	41.2194	21.4822	22.8449	28.1888
ENSMUSG00000022220.15	chr14:56006514-56021552	Adcy4	protein_coding	MGI:99674	NA	2	349.73	0.805551	0.227965	3.53366	0.000409845	0.00825425	1.7461	2.39909	2.26901	4.27401	2.68195	4.31056
ENSMUSG00000028439.15	chr4:41517691-41569538	Fam219a	protein_coding	MGI:1919151	NA	2	1016.88	-0.39582	0.112057	-3.53232	0.000411924	0.008282	13.1279	10.8988	10.2464	8.35569	8.82546	8.75326
ENSMUSG00000034243.18	chr16:36695502-36753447	Golgb1	protein_coding	MGI:1099447	NA	2	1349.46	-0.411284	0.116476	-3.53105	0.000413918	0.00830793	4.73579	4.35887	5.30447	3.29618	3.38441	4.17849
ENSMUSG00000027742.14	chr3:52889296-52924658	Cog6	protein_coding	MGI:1914792	NA	1	2209.36	-0.548113	0.155254	-3.53043	0.000414883	0.00831315	32.0644	32.741	22.0962	22.6169	19.7684	16.6652
ENSMUSG00000052155.6	chr2:48704121-48793281	Acvr2a	protein_coding	MGI:102806	NA	2	844.543	-0.486663	0.137876	-3.52971	0.000416023	0.00832187	8.669	5.04181	5.95004	3.68673	4.60764	5.5252
ENSMUSG00000078813.4	chr7:3663097-3668839	Leng1	protein_coding	MGI:1917007	overlapping_locus	2	281.916	0.474888	0.134564	3.52909	0.000416992	0.00832419	3.31505	4.60079	4.18538	5.58312	6.29387	4.88074
ENSMUSG00000029710.16	chr5:137348371-137376931	Ephb4	protein_coding	MGI:104757	NA	2	576.171	0.436929	0.12382	3.52874	0.00041755	0.00832419	3.4686	3.5439	4.49468	5.54141	4.59678	5.44473
ENSMUSG00000062006.13	chr3:130520480-130524047	Rpl34	protein_coding	MGI:1915686	NA	2	1447.82	-0.428929	0.121663	-3.52555	0.000422611	0.00841088	34.0994	30.9886	28.0148	23.2557	27.7256	18.8163
ENSMUSG00000042419.9	chr17:35439151-35454768	Nfkbil1	protein_coding	MGI:1340031	NA	2	187.443	-0.58831	0.166897	-3.525	0.00042349	0.00841419	4.73894	5.23219	3.80458	3.09534	3.02789	2.98998
ENSMUSG00000025816.16	chr2:5875798-5900243	Sec61a2	protein_coding	MGI:1931071	NA	2	922.361	-0.311613	0.0884299	-3.52385	0.000425332	0.00843658	11.4212	10.6379	8.69403	9.14991	8.41815	7.17355
ENSMUSG00000063049.5	chr8:48120213-48128591	Ing2	protein_coding	MGI:1916510	NA	1	299.776	-0.480192	0.136287	-3.52339	0.000426064	0.00843693	4.94663	4.51013	3.74568	3.15989	3.45915	2.79969
ENSMUSG00000026003.6	chr1:66869998-66902436	Acadl	protein_coding	MGI:87866	overlapping_locus	2	8749.82	0.627106	0.178022	3.52263	0.000427294	0.0084471	105.182	137.297	129.967	179.965	211.966	181.146
ENSMUSG00000027692.17	chr3:28317363-28730007	Tnik	protein_coding	MGI:1916264	ncRNA_host	2	1544.2	0.479708	0.136264	3.52043	0.00043085	0.00847823	3.18053	4.3119	3.35648	5.16859	4.76622	5.20167
ENSMUSG00000016831.13	chr14:52516603-52533858	Tox4	protein_coding	MGI:1915389	NA	1	1398.57	-0.270425	0.0768174	-3.52036	0.000430959	0.00847823	11.6919	9.49231	9.58162	8.29214	8.20622	8.92271
ENSMUSG00000078486.4	chr4:156300325-156305764	Perm1	protein_coding	MGI:1921433	NA	2	8762.1	0.594515	0.168896	3.52001	0.000431534	0.00847823	56.0395	72.4177	64.1933	117.602	116.896	64.6024
ENSMUSG00000029407.11	chr5:92285797-92350657	Uso1	protein_coding	MGI:1929095	ncRNA_host	2	3052.74	-0.25103	0.0713256	-3.5195	0.000432367	0.00847823	30.2636	31.2576	30.0809	26.0498	25.0147	25.8808
ENSMUSG00000034472.14	chr8:75940572-75950741	Rasd2	protein_coding	MGI:1922391	NA	2	777.176	-1.24251	0.353083	-3.51905	0.000433098	0.00847823	8.65759	4.06803	17.9972	1.66298	2.46816	12.4259
ENSMUSG00000023959.11	chr17:44445659-44591059	Clic5	protein_coding	MGI:1917912	NA	2	6924.51	-0.496336	0.141047	-3.51893	0.000433284	0.00847823	41.4817	53.0028	39.9291	33.7055	26.6911	34.6152
ENSMUSG00000029059.10	chr4:154979961-154983592	Prxl2b	protein_coding	MGI:1913719	NA	1	1863.16	-0.49344	0.140239	-3.51856	0.000433897	0.00847823	95.6482	78.1086	67.329	44.0126	54.0382	74.6756
ENSMUSG00000032547.13	chr9:102712116-102785504	Ryk	protein_coding	MGI:101766	NA	2	1591.35	-0.342449	0.0973433	-3.51795	0.000434894	0.00848366	18.6521	16.7177	16.3336	13.1514	13.7604	13.8166
ENSMUSG00000021377.16	chr13:47238251-47259677	Dek	protein_coding	MGI:1926209	NA	2	1073.27	-0.387632	0.110211	-3.51719	0.000436136	0.00848634	15.698	14.6827	12.1065	10.7467	10.4253	11.1712
ENSMUSG00000014361.6	chr2:128540876-128644814	Mertk	protein_coding	MGI:96965	ncRNA_host	2	141.743	1.08404	0.308229	3.51699	0.000436469	0.00848634	0.314164	0.280916	0.790945	0.812059	0.618637	1.39749
ENSMUSG00000023927.16	chr17:52043215-52140318	Satb1	protein_coding	MGI:105084	overlapping_locus	2	2206.47	-0.358563	0.101995	-3.51549	0.000438944	0.00851141	7.90714	7.31193	6.19803	5.12204	5.97976	5.50748
ENSMUSG00000039735.17	chr3:122332368-122413364	Fnbp1l	protein_coding	MGI:1925642	ncRNA_host	2	221.137	0.601862	0.17121	3.51533	0.000439201	0.00851141	0.947506	1.22142	1.24667	2.00984	1.68518	1.51386
ENSMUSG00000021712.16	chr13:104315305-104339880	Trim23	protein_coding	MGI:1933161	NA	2	786.551	-0.349636	0.0994937	-3.51415	0.000441162	0.0085354	5.9082	5.92692	5.45142	4.50963	4.54967	4.49869
ENSMUSG00000020271.18	chr11:32592724-32696816	Fbxw11	protein_coding	MGI:2144023	NA	2	1622.1	-0.283153	0.0806085	-3.51269	0.000443591	0.00855639	16.8835	14.4169	13.1384	12.5185	11.4836	12.3594
ENSMUSG00000021868.8	chr14:25694594-25700892	Ppif	protein_coding	MGI:2145814	NA	2	1120.93	0.46116	0.131286	3.51263	0.000443697	0.00855639	25.0796	22.6918	19.9861	34.1235	38.6691	22.5686
ENSMUSG00000009291.14	chr10:77417554-77434566	Pttg1ip	protein_coding	MGI:2652132	NA	2	672.644	0.44337	0.126239	3.51214	0.00044452	0.00855827	4.92459	6.58241	9.21694	8.95576	8.12625	10.5003
ENSMUSG00000053166.15	chr2:164953427-165076773	Cdh22	protein_coding	MGI:1341843	NA	2	36.993	2.42759	0.691367	3.51129	0.000445938	0.00857159	0.0408852	0.0587546	0.258725	0.752058	0.302496	0.293789
ENSMUSG00000056342.17	chr11:23256895-23440560	Usp34	protein_coding	MGI:109473	NA	2	2656.06	-0.36469	0.103912	-3.5096	0.000448776	0.00861213	6.23921	5.65786	4.87068	4.25559	4.0194	4.71009
ENSMUSG00000100599.3	chr15:99147392-99159925	1700120C14Rik	lncRNA	MGI:1920850	NA	2	645.425	-0.523788	0.149288	-3.50856	0.000450534	0.00862649	36.1526	35.6614	39.8783	25.5298	30.7366	22.0412
ENSMUSG00000015846.16	chr2:27566452-27652969	Rxra	protein_coding	MGI:98214	NA	2	5669.56	-0.328271	0.0935806	-3.5079	0.000451661	0.00862649	38.7898	33.6876	35.529	30.2963	28.8896	26.9036
ENSMUSG00000043822.19	chr10:80174944-80184246	Adamtsl5	protein_coding	MGI:1913798	NA	2	1147.52	0.670941	0.191268	3.50787	0.000451718	0.00862649	10.9621	16.8181	10.3812	23.2758	21.187	15.7383
ENSMUSG00000051335.7	chr13:43348721-43457648	Gfod1	protein_coding	MGI:2145304	NA	2	387.924	0.799938	0.228416	3.50211	0.00046159	0.00880079	1.07092	1.30361	1.55169	2.6981	2.39183	1.74169
ENSMUSG00000015488.15	chr2:26899938-26911101	Cacfd1	protein_coding	MGI:1924317	NA	1	1459.91	-0.351944	0.100539	-3.50058	0.000464246	0.00883715	12.64	12.5897	12.162	9.75039	11.108	8.56174
ENSMUSG00000018574.15	chr11:69901009-69906234	Acadvl	protein_coding	MGI:895149	NA	2	12146.4	0.557729	0.159348	3.50006	0.000465157	0.00884023	152.032	180.669	165.657	242.995	293.582	201.755
ENSMUSG00000021451.17	chr13:51839565-51947783	Sema4d	protein_coding	MGI:109244	NA	2	2275.58	-0.400552	0.11448	-3.49887	0.000467227	0.0088653	14.3677	11.9489	12.1942	8.46805	10.1469	10.4868
ENSMUSG00000048277.16	chr11:117700494-117705109	Syngr2	protein_coding	MGI:1328324	overlapping_locus	2	3848.55	-0.252692	0.0722502	-3.49745	0.000469724	0.00889622	96.5366	89.1776	83.3009	78.3649	80.1713	67.638
ENSMUSG00000037341.15	chrX:19971993-20158046	Slc9a7	protein_coding	MGI:2444530	NA	2	112.912	-0.799923	0.22874	-3.49709	0.000470365	0.00889622	1.49842	1.57094	1.77268	0.690903	0.826198	1.31094
ENSMUSG00000003526.13	chr16:17878221-17908067	Prodh	protein_coding	MGI:97770	NA	1	252.134	0.664041	0.189946	3.49595	0.000472372	0.00891615	1.73421	1.41991	2.74876	2.48354	2.9112	3.8327
ENSMUSG00000040428.20	chr7:45175754-45203653	Plekha4	protein_coding	MGI:1916467	NA	2	112.126	1.11278	0.318333	3.49564	0.000472929	0.00891615	0.360588	0.544098	1.11331	1.06076	0.829833	2.48004
ENSMUSG00000005625.16	chr3:94940005-94949925	Psmd4	protein_coding	MGI:1201670	NA	2	3860.22	-0.35054	0.10033	-3.49386	0.00047609	0.00895482	80.6805	85.0688	76.6292	58.4522	65.0233	66.4454
ENSMUSG00000024654.9	chr19:9087232-9113000	Asrgl1	protein_coding	MGI:1913764	NA	2	1991.91	-0.349033	0.0999089	-3.49351	0.000476716	0.00895482	20.1246	19.6401	16.9907	14.5401	17.4427	12.6843
ENSMUSG00000039067.6	chr8:108307013-108315096	Psmd7	protein_coding	MGI:1351511	NA	2	3712.36	-0.272135	0.077904	-3.49321	0.000477256	0.00895482	94.5542	100.376	85.7135	77.1726	76.58	78.2857
ENSMUSG00000027642.16	chr2:157120937-157168239	Rpn2	protein_coding	MGI:98085	NA	2	1563.49	-0.24253	0.0694547	-3.49192	0.000479558	0.00898279	16.3793	17.2364	19.8135	14.7455	15.0158	15.3104
ENSMUSG00000020272.9	chr11:32483305-32574587	Stk10	protein_coding	MGI:1099439	NA	2	122.69	0.804483	0.23041	3.49153	0.00048027	0.00898279	0.682602	0.57991	0.848338	1.43373	0.958599	1.29838
ENSMUSG00000015342.7	chrX:9138995-9179489	Xk	protein_coding	MGI:103569	overlapping_locus	2	234.654	-0.485172	0.13898	-3.49095	0.000481304	0.00898789	2.13697	2.05683	1.77127	1.41961	1.40065	1.42639
ENSMUSG00000030401.17	chr7:19016549-19030085	Rtn2	protein_coding	MGI:107612	NA	2	16507.1	-0.430295	0.12332	-3.48927	0.000484349	0.00903046	332.822	318.655	319.158	227.762	267.193	226.068
ENSMUSG00000051550.11	chr7:4986482-4999157	Zfp579	protein_coding	MGI:1915740	NA	2	283.898	0.565057	0.161988	3.48826	0.000486179	0.00903633	1.71045	2.51033	2.16923	3.39632	3.09959	2.90646
ENSMUSG00000061816.16	chr1:66963454-66984543	Myl1	protein_coding	MGI:97269	NA	2	174017	-0.312074	0.0894642	-3.48825	0.000486194	0.00903633	4918.76	4136.01	4452.67	3378.35	3544.36	3956.8
ENSMUSG00000026072.13	chr1:40264240-40356417	Il1r1	protein_coding	MGI:96545	NA	2	173.826	0.919407	0.263633	3.48744	0.000487663	0.00904936	0.570889	0.649486	0.796333	1.26117	0.953634	1.6702
ENSMUSG00000004931.12	chr10:81102794-81109080	Apba3	protein_coding	MGI:1888527	ncRNA_host	2	2310.3	0.347172	0.0995955	3.48582	0.000490635	0.00909023	24.6447	28.2532	25.0068	32.1341	33.323	33.2462
ENSMUSG00000042473.9	chrX:138585745-138654154	Tbc1d8b	protein_coding	MGI:1918101	NA	2	190.012	-0.544226	0.156214	-3.48385	0.000494258	0.00914299	1.72338	1.68631	1.52379	1.20998	1.08949	1.08531
ENSMUSG00000059493.14	chrX:160616292-160942726	Nhs	protein_coding	MGI:2684894	NA	2	66.6148	-1.72916	0.496525	-3.48253	0.000496697	0.00917373	0.779275	0.148218	0.557931	0.134849	0.168591	0.112934
ENSMUSG00000025465.14	chr7:139685623-139696389	Echs1	protein_coding	MGI:2136460	NA	2	3546.69	0.443388	0.127515	3.47715	0.000506776	0.00934527	59.1365	70.6592	84.5939	104.632	111.464	76.2991
ENSMUSG00000051285.18	chr1:7159144-7243852	Pcmtd1	protein_coding	MGI:2441773	overlapping_locus	2	2711.24	-0.299958	0.0862847	-3.47638	0.000508237	0.00935758	24.4541	20.2752	17.556	17.4672	18.7447	14.294
ENSMUSG00000033960.7	chr18:4634878-4682869	Jcad	protein_coding	MGI:2685174	NA	2	986.343	0.51479	0.148169	3.47435	0.000512098	0.00941399	4.02043	3.87666	4.54645	6.39865	5.37428	6.00526
ENSMUSG00000029167.14	chr5:51611592-51725068	Ppargc1a	protein_coding	MGI:1342774	overlapping_locus	1	1974.29	0.740975	0.21331	3.47371	0.000513318	0.00942174	6.81168	4.99559	9.26621	12.4406	8.22924	14.2268
ENSMUSG00000036199.10	chr8:70346830-70355208	Ndufa13	protein_coding	MGI:1914434	NA	2	5948	-0.282066	0.0812656	-3.47091	0.0005187	0.00949691	191.324	225.716	152.508	165.801	170.413	129.912
ENSMUSG00000025266.12	chrX:149766137-149800318	Gnl3l	protein_coding	MGI:2448557	NA	2	1270.49	-0.401353	0.115639	-3.47074	0.000519023	0.00949691	10.4643	11.1036	9.69725	7.71341	8.87324	7.11527
ENSMUSG00000036073.19	chr4:41755228-41758695	Galt	polymorphic_pseudogene	MGI:95638	overlapping_locus	2	624.524	0.372986	0.107557	3.46779	0.000524757	0.00956587	7.51374	8.78488	7.91486	10.9026	10.7607	9.70842
ENSMUSG00000086604.3	chr7:5049948-5060115	Gm15510	lncRNA	MGI:3782958	NA	1	47.9192	6.10191	1.75968	3.46762	0.000525089	0.00956587	0.0430481	0.0371177	0.0790872	4.01743	4.48861	1.72341
ENSMUSG00000003226.8	chr10:58282744-58330178	Ranbp2	protein_coding	MGI:894323	NA	2	2629.97	-0.498372	0.143725	-3.46755	0.000525223	0.00956587	11.5314	11.292	10.4994	7.71728	6.72483	9.3631
ENSMUSG00000049327.18	chr5:124577993-124600371	Kmt5a	protein_coding	MGI:1915206	NA	2	3333.74	-0.33608	0.0969524	-3.46644	0.000527397	0.00959066	36.3719	35.0882	46.7435	32.1912	29.55	31.2971
ENSMUSG00000042050.9	chr12:116170671-116226642	Dync2i1	protein_coding	MGI:2445085	ncRNA_host	2	467.046	-0.394273	0.113811	-3.46429	0.000531637	0.0096529	5.33557	4.55661	4.85052	3.63753	3.18798	4.50196
ENSMUSG00000038205.13	chr3:97565509-97581128	Prkab2	protein_coding	MGI:1336185	NA	2	10553.2	-0.533112	0.153972	-3.46239	0.000535392	0.00970613	106.256	69.1529	94.3934	59.4548	61.8394	63.3672
ENSMUSG00000058587.10	chr9:75404989-75466939	Tmod3	protein_coding	MGI:1355315	NA	2	616.429	0.532945	0.153956	3.46167	0.000536843	0.00971752	2.82823	3.03709	4.11111	5.53192	3.89305	4.90045
ENSMUSG00000042599.9	chr6:39113557-39183723	Kdm7a	protein_coding	MGI:2443388	NA	1	1434.18	-0.435732	0.126085	-3.45586	0.00054854	0.00991403	6.2407	6.97276	5.02298	4.97079	4.30896	4.15583
ENSMUSG00000051469.15	chr18:24142759-24153867	Zfp24	protein_coding	MGI:1929704	NA	2	1120.8	-0.29268	0.0847269	-3.4544	0.000551523	0.0099527	8.86597	7.87349	5.78913	6.31347	6.5325	5.32691
ENSMUSG00000032253.14	chr9:82748212-82857569	Phip	protein_coding	MGI:1932404	NA	1	560.217	-0.726204	0.210273	-3.45362	0.000553114	0.00996619	1.94781	2.18829	1.94548	1.05139	1.11995	1.59321
ENSMUSG00000040385.8	chr19:4242064-4245419	Ppp1ca	protein_coding	MGI:103016	NA	2	3922.36	-0.326257	0.0944874	-3.45292	0.000554559	0.009977	97.2017	102.968	101.315	76.0636	89.5968	74.9982
ENSMUSG00000025610.8	chr16:87350218-87392224	Map3k7cl	protein_coding	MGI:2446584	NA	2	354.787	-0.969931	0.28101	-3.45159	0.000557302	0.0100047	8.70394	15.7207	6.56462	4.70893	7.39351	3.55513
ENSMUSG00000023094.15	chr2:19376251-19399787	Msrb2	protein_coding	MGI:1923717	NA	2	421.022	0.627294	0.181753	3.45135	0.000557796	0.0100047	10.4056	7.73999	9.89503	15.61	16.1325	12.1861
ENSMUSG00000008658.17	chr16:5703219-7229390	Rbfox1	protein_coding	MGI:1926224	NA	2	5510.51	-0.465056	0.134799	-3.45001	0.000560571	0.0100392	55.4632	44.6389	55.0313	34.5409	38.9044	38.6454
ENSMUSG00000044405.5	chr2:158344532-158350118	Adig	protein_coding	MGI:2675492	NA	2	38.6018	2.46398	0.714946	3.44638	0.000568153	0.0101596	0.311434	0.214824	1.90721	2.42625	4.79059	2.4169
ENSMUSG00000035311.17	chr10:88214994-88283191	Gnptab	protein_coding	MGI:3643902	NA	2	588.432	-0.390696	0.113397	-3.44537	0.000570287	0.0101726	4.84695	3.99686	4.43078	3.31119	3.46631	3.3327
ENSMUSG00000046985.12	chr5:44332496-44383964	Tapt1	protein_coding	MGI:2683537	overlapping_locus	2	1559.29	-0.346897	0.10069	-3.44522	0.000570604	0.0101726	18.7346	20.2012	14.8398	15.2835	15.2517	11.7213
ENSMUSG00000026100.7	chr1:53100799-53107238	Mstn	protein_coding	MGI:95691	NA	2	1512.06	-0.449572	0.130665	-3.44064	0.00058033	0.0103199	22.6616	16.3715	26.5563	10.7314	14.8362	23.5615
ENSMUSG00000055652.15	chr7:75498058-75523879	Klhl25	protein_coding	MGI:2668031	NA	2	97.9331	0.772158	0.224431	3.44051	0.000580616	0.0103199	0.523364	0.846121	0.705112	1.19983	1.26972	1.04764
ENSMUSG00000025393.13	chr10:127919142-127926260	Atp5b	protein_coding	MGI:107801	ncRNA_host	2	83683.8	0.230514	0.0670745	3.43668	0.000588889	0.0104512	1347.92	1519.54	1251.71	1698.67	1833.8	1327.45
ENSMUSG00000026074.16	chr1:39940073-40065470	Map4k4	protein_coding	MGI:1349394	NA	2	693.701	0.597075	0.173763	3.43615	0.000590039	0.0104559	2.44177	2.67574	3.48076	4.33419	3.45664	5.18579
ENSMUSG00000035674.14	chr7:3620372-3623326	Ndufa3	protein_coding	MGI:1913341	NA	2	3206.14	0.335139	0.0975879	3.43423	0.000594237	0.0105145	105.881	137.372	127.397	163.822	170.482	134.069
ENSMUSG00000021945.10	chr14:57124110-57200158	Zmym2	protein_coding	MGI:1923257	NA	2	1124.41	-0.430221	0.125326	-3.43282	0.000597334	0.010551	6.82245	6.77952	5.63	5.04866	4.79782	4.40177
ENSMUSG00000024687.12	chr19:11943305-11971476	Osbp	protein_coding	MGI:97447	NA	2	2852.37	-0.255055	0.0743063	-3.43248	0.000598085	0.010551	24.4393	24.1451	27.2962	21.183	21.1163	21.1941
ENSMUSG00000015312.10	chr10:80765907-80768038	Gadd45b	protein_coding	MGI:107776	NA	2	668.004	-1.235	0.359932	-3.4312	0.000600927	0.0105853	23.6817	22.7339	8.71504	17.4873	10.6297	1.81192
ENSMUSG00000047139.10	chr10:43454280-43460261	Cd24a	protein_coding	MGI:88323	NA	2	5364.58	-0.579792	0.169042	-3.42986	0.000603885	0.0106215	111.269	103.764	71.9247	69.4125	46.1907	74.0247
ENSMUSG00000044456.17	chr12:102249307-102357114	Rin3	protein_coding	MGI:2385708	NA	1	347.217	0.989532	0.288541	3.42944	0.000604832	0.0106224	0.685944	0.890569	1.18778	2.04107	0.972688	2.48149
ENSMUSG00000002064.11	chr11:78136572-78146322	Sdf2	protein_coding	MGI:108019	NA	1	919.73	-0.328811	0.0959063	-3.42846	0.000607008	0.0106447	23.9042	26.7632	26.5716	21.0152	20.6772	19.8091
ENSMUSG00000037852.9	chr8:65045576-65146088	Cpe	protein_coding	MGI:101932	NA	2	6504.21	-0.286879	0.0837595	-3.42503	0.000614729	0.0107641	103.805	101.793	94.4429	77.633	81.9814	86.3154
ENSMUSG00000018398.19	chr11:53410084-53440392	Septin8	protein_coding	MGI:894310	NA	1	379.144	0.580629	0.169567	3.42418	0.00061666	0.010782	1.30959	1.70806	2.26383	2.75778	2.36169	2.58826
ENSMUSG00000020475.4	chr11:5751640-5753733	Pgam2	protein_coding	MGI:1933118	NA	2	42145	-0.21613	0.0631998	-3.4198	0.000626678	0.0109409	2096.29	2099.43	1765.42	1853.4	1878.52	1425.8
ENSMUSG00000031299.11	chrX:158905205-158921409	Pdha1	protein_coding	MGI:97532	NA	2	22955.7	0.224638	0.0657209	3.41806	0.000630697	0.0109948	239.223	244.298	243.413	285.425	312.026	254.687
ENSMUSG00000027637.4	chr2:156705048-156715483	Rab5if	protein_coding	MGI:1914638	NA	2	1121.58	-0.258385	0.075621	-3.41684	0.000633521	0.0110278	37.8392	37.9767	32.0392	30.1806	32.6163	27.2027
ENSMUSG00000030850.18	chr7:129993223-130122099	Ate1	protein_coding	MGI:1333870	NA	2	1405.12	-0.295983	0.0866617	-3.41538	0.000636923	0.0110706	11.1886	10.2888	10.2201	8.98803	8.16238	8.66628
ENSMUSG00000079428.9	chrX:135115528-135126849	Tceal7	protein_coding	MGI:1915746	NA	2	448.19	-1.22167	0.357781	-3.41458	0.000638813	0.0110767	15.4632	37.3537	13.5062	8.9489	8.92346	10.4177
ENSMUSG00000013419.8	chr9:121588396-121600808	Zfp651	protein_coding	MGI:2670992	NA	2	5272.52	-0.38636	0.113155	-3.41443	0.000639148	0.0110767	32.6566	42.7874	27.9517	27.62	27.0821	23.7816
ENSMUSG00000110949.2	chr19:4050580-4052103	Nudt8	protein_coding	MGI:1913637	overlapping_locus	2	321.946	0.708072	0.207437	3.41342	0.000641521	0.0111001	10.7059	11.7184	11.6206	19.6131	21.3769	15.2016
ENSMUSG00000032330.8	chr9:79662643-79667160	Cox7a2	protein_coding	MGI:1316715	NA	2	2565.14	0.219657	0.0643577	3.41306	0.000642379	0.0111001	116.219	124.732	95.2886	137.032	139.728	113.967
ENSMUSG00000028434.13	chr4:56991972-57143437	Epb41l4b	protein_coding	MGI:1859149	NA	2	115.658	-0.855747	0.250854	-3.41133	0.000646457	0.0111542	0.529698	0.206263	0.973153	0.143286	0.170522	0.813872
ENSMUSG00000056716.11	chr10:21562310-21583339	Gm5420	lncRNA	MGI:3645721	NA	2	56.0943	0.954374	0.279822	3.41065	0.000648087	0.0111647	0.504725	0.76594	0.754182	1.45815	1.47982	1.05696
ENSMUSG00000014905.5	chr12:44252342-44257109	Dnajb9	protein_coding	MGI:1351618	NA	2	1195.66	-0.518524	0.152047	-3.41028	0.000648957	0.0111647	16.25	24.1658	18.8241	13.669	15.0495	12.4591
ENSMUSG00000035242.16	chr10:80662490-80665124	Oaz1	protein_coding	MGI:109433	ncRNA_host	2	7834.86	-0.305592	0.0896615	-3.40828	0.000653735	0.0112282	291.808	267.531	245.967	205.904	230.955	213.034
ENSMUSG00000079037.10	chr2:131751848-131780349	Prnp	protein_coding	MGI:97769	overlapping_locus	2	3215.23	-0.300917	0.0883008	-3.40786	0.000654742	0.0112282	53.4024	56.2758	61.1341	50.8859	44.0716	43.7006
ENSMUSG00000025558.20	chr14:121779458-122035249	Dock9	protein_coding	MGI:106321	NA	2	914.295	0.290363	0.0852118	3.40755	0.000655499	0.0112282	3.68718	3.20309	3.29886	3.98961	4.04659	4.42265
ENSMUSG00000064145.13	chr9:108480141-108526585	Arih2	protein_coding	MGI:1344361	NA	2	2328.74	-0.348708	0.102387	-3.4058	0.000659702	0.0112838	24.8062	23.215	18.9778	17.7699	18.7043	15.9008
ENSMUSG00000061723.19	chr7:142052573-142069745	Tnnt3	protein_coding	MGI:109550	NA	2	465007	-0.307917	0.0904635	-3.40378	0.000664614	0.0113513	17956.8	14233.8	16539.3	12256.4	13186.6	13845.7
ENSMUSG00000034653.12	chr18:44960813-45022791	Ythdc2	protein_coding	MGI:2448561	overlapping_locus	2	284.638	-0.554601	0.162984	-3.40279	0.000667006	0.0113757	2.08879	1.9456	1.48024	1.34927	1.22245	1.15314
ENSMUSG00000028104.15	chr3:96485188-96501497	Polr3gl	protein_coding	MGI:1917120	NA	2	1069.46	-0.372474	0.109673	-3.39621	0.000683253	0.011636	33.0221	27.4973	28.7965	20.9162	24.6923	23.1698
ENSMUSG00000047746.15	chr16:36783822-36810829	Fbxo40	protein_coding	MGI:2443753	NA	2	10933.1	-0.405747	0.119632	-3.39164	0.000694756	0.0118081	81.9173	105.877	75.794	74.2188	63.0857	60.9784
ENSMUSG00000052544.10	chr3:152903903-153430811	St6galnac3	protein_coding	MGI:1341828	NA	2	62.0474	1.06452	0.313887	3.3914	0.00069536	0.0118081	0.140621	0.321572	0.194696	0.416772	0.530198	0.406695
ENSMUSG00000020777.17	chr11:116062714-116089871	Acox1	protein_coding	MGI:1330812	NA	2	4741.34	0.352988	0.104112	3.39048	0.000697701	0.0118308	24.6305	28.4449	35.876	39.952	40.453	32.7315
ENSMUSG00000085272.8	chr7:4968259-4974167	Sbk3	protein_coding	MGI:2685924	NA	1	66.028	2.88534	0.85119	3.38977	0.000699518	0.0118446	0.0157811	0.0816426	0.386572	0.601913	0.236234	0.952549
ENSMUSG00000034471.13	chr11:115690009-115704465	Caskin2	protein_coding	MGI:2157062	NA	2	880.328	0.355433	0.104939	3.38704	0.000706511	0.0119292	4.27826	5.06696	5.81887	6.00264	5.47316	8.00722
ENSMUSG00000025154.16	chr19:41755027-41790486	Arhgap19	protein_coding	MGI:1918335	NA	2	380.226	-0.471128	0.139108	-3.38677	0.000707206	0.0119292	3.01547	3.45253	2.78513	2.62362	2.0873	1.98516
ENSMUSG00000026927.18	chr2:26272814-26279328	Entr1	protein_coding	MGI:1915362	NA	2	580.098	0.346157	0.102213	3.38664	0.000707544	0.0119292	4.61343	5.17851	5.36623	6.55178	6.50526	6.22009
ENSMUSG00000025019.18	chr19:41471076-41574975	Lcor	protein_coding	MGI:2443930	NA	2	295.245	-1.15025	0.339852	-3.38456	0.00071293	0.0119917	1.05529	1.19958	0.864092	0.3881	0.35091	0.769255
ENSMUSG00000028521.18	chr4:103027846-103072361	Slc35d1	protein_coding	MGI:2140361	NA	2	223.509	-0.511925	0.151259	-3.38442	0.000713285	0.0119917	1.11571	1.06773	1.09246	0.830798	0.841724	0.638103
ENSMUSG00000033352.12	chr11:65579069-65679123	Map2k4	protein_coding	MGI:1346869	ncRNA_host	2	2197.31	-0.258443	0.0763844	-3.38345	0.000715805	0.012017	20.0879	19.2793	16.7799	16.0998	16.5448	14.2114
ENSMUSG00000047514.7	chr10:34158186-34161271	Tspyl1	protein_coding	MGI:1298395	NA	2	2114.46	-0.235403	0.0696051	-3.38197	0.000719675	0.0120648	26.7956	27.164	27.4026	23.0188	22.8782	23.18
ENSMUSG00000019505.8	chr11:62441997-62444039	Ubb	protein_coding	MGI:98888	NA	2	11957.4	-0.423822	0.125407	-3.37957	0.000725982	0.0121533	287.774	286.827	258.37	192.713	203.616	225.721
ENSMUSG00000079588.4	chr1:40844761-40896047	Tmem182	protein_coding	MGI:1923725	NA	2	7784.26	-0.232419	0.0687891	-3.37872	0.000728246	0.0121739	112.217	127.238	101.541	98.061	107.767	84.4709
ENSMUSG00000000339.15	chr3:116282612-116301857	Rtca	protein_coding	MGI:1913618	NA	2	612.188	-0.33547	0.099328	-3.3774	0.000731755	0.0122152	16.3053	16.3031	12.8848	12.1124	13.5474	10.2938
ENSMUSG00000036615.8	chr3:54710536-54715212	Rfxap	protein_coding	MGI:2180854	NA	2	396.406	-0.361959	0.107184	-3.37698	0.000732854	0.0122163	8.03367	7.9941	6.43567	5.98986	6.35389	5.08668
ENSMUSG00000025375.16	chr11:119898139-119937993	Aatk	protein_coding	MGI:1197518	ncRNA_host	2	154.23	0.930227	0.275774	3.37315	0.000743128	0.0123701	0.377041	0.331233	0.858243	0.640815	0.642624	1.78332
ENSMUSG00000045954.8	chr1:51328285-51342119	Cavin2	protein_coding	MGI:99513	NA	2	1062.71	0.457218	0.135563	3.37274	0.00074423	0.012371	10.9823	12.9865	14.1488	17.0875	18.9929	16.0814
ENSMUSG00000038240.14	chr10:43097482-43340878	Pdss2	protein_coding	MGI:1918615	overlapping_locus	2	545.482	0.392153	0.116304	3.3718	0.000746784	0.0123917	3.60095	3.34047	3.25103	4.4665	4.90632	4.01504
ENSMUSG00000026208.10	chr1:75336973-75345223	Des	protein_coding	MGI:94885	NA	2	87096.2	-0.225598	0.0669129	-3.37151	0.000747577	0.0123917	1036.96	1038.67	1080.63	836.612	819.626	1061.06
ENSMUSG00000005950.15	chr11:73051247-73063511	P2rx5	protein_coding	MGI:2137026	NA	2	311.229	0.609399	0.180778	3.37098	0.000749009	0.012398	2.48575	4.28662	4.33457	5.76107	4.83885	5.9554
ENSMUSG00000004880.12	chr1:181642900-181670611	Lbr	protein_coding	MGI:2138281	ncRNA_host	2	563.292	-0.372673	0.110622	-3.3689	0.000754695	0.0124747	5.69212	6.15966	5.4198	4.49525	4.87727	3.96078
ENSMUSG00000021978.10	chr14:65289509-65387304	Extl3	protein_coding	MGI:1860765	NA	2	1831.56	-0.305717	0.0907622	-3.36833	0.00075624	0.0124794	13.88	12.3625	11.8532	10.1159	10.5752	10.0814
ENSMUSG00000031765.9	chr8:94905710-94906955	Mt1	protein_coding	MGI:97171	NA	2	1001.7	0.943089	0.280013	3.36802	0.000757095	0.0124794	2.95587	3.84046	6.42235	5.9147	8.65307	9.57673
ENSMUSG00000030753.16	chr7:98352310-98367269	Thap12	protein_coding	MGI:1920231	NA	2	5512.76	-0.312181	0.0927969	-3.36413	0.000767853	0.0126391	60.6443	57.5087	48.9437	42.3901	49.2569	42.4027
ENSMUSG00000033186.10	chr14:99271980-99283570	Mzt1	protein_coding	MGI:1924039	NA	2	1162.47	-0.299751	0.0892206	-3.35966	0.000780371	0.0128272	19.4093	17.618	17.5399	15.0001	15.7395	13.6398
ENSMUSG00000074519.12	chr2:177665077-177675815	Zfp971	protein_coding	MGI:1261426	NA	2	326.448	-0.944855	0.281356	-3.35822	0.000784461	0.0128397	8.93794	7.46326	5.21427	3.62664	2.67106	5.05594
ENSMUSG00000041740.17	chr5:115379471-115410957	Rnf10	protein_coding	MGI:1859162	NA	2	11504.1	-0.190137	0.0566264	-3.35775	0.000785809	0.0128397	119.161	124.922	125.285	107.735	106.452	109.461
ENSMUSG00000039239.15	chr1:186354989-186438186	Tgfb2	protein_coding	MGI:98726	NA	2	617.678	-0.437146	0.130204	-3.35738	0.000786836	0.0128397	5.19481	4.70312	3.88883	3.51064	4.18405	2.55414
ENSMUSG00000036499.10	chr10:95776553-95881380	Eea1	protein_coding	MGI:2442192	NA	2	1320.68	-0.351643	0.104737	-3.35738	0.00078685	0.0128397	6.56724	6.45464	6.22268	5.14809	4.55301	5.42121
ENSMUSG00000031600.12	chr8:40964824-41003798	Vps37a	protein_coding	MGI:1261835	NA	2	1952.74	-0.354456	0.105582	-3.35716	0.000787471	0.0128397	14.5877	12.6271	14.1335	10.9225	11.0666	10.4348
ENSMUSG00000039156.20	chr5:54155841-54278399	Stim2	protein_coding	MGI:2151156	NA	2	1027.94	-0.496805	0.147987	-3.3571	0.000787655	0.0128397	10.4665	6.65697	7.3906	5.35302	5.38215	6.45266
ENSMUSG00000028073.16	chr3:87655197-87731613	Pear1	protein_coding	MGI:1920432	overlapping_locus	2	296.301	0.646117	0.19251	3.35628	0.000789984	0.0128598	1.19029	1.40947	1.65223	2.78834	2.02755	1.8719
ENSMUSG00000024170.16	chr17:25318544-25334941	Telo2	protein_coding	MGI:1918968	NA	2	229.439	0.570123	0.169939	3.35486	0.00079405	0.0128948	1.72462	1.92583	1.74871	3.0515	2.56853	2.40307
ENSMUSG00000020846.7	chr11:75910020-75918608	Rflnb	protein_coding	MGI:1923816	NA	2	500.181	0.747772	0.222898	3.35477	0.000794316	0.0128948	4.22352	5.22716	4.66266	10.7254	8.54252	5.15843
ENSMUSG00000015656.18	chr9:40712280-40721383	Hspa8	protein_coding	MGI:105384	ncRNA_host	2	22384.8	0.611269	0.182274	3.35358	0.000797741	0.0129326	161.638	242.089	152.171	274.465	269.971	297.228
ENSMUSG00000057229.12	chr7:25318839-25324976	Dmac2	protein_coding	MGI:1913599	NA	2	1021.08	0.433688	0.129366	3.35241	0.000801124	0.0129576	11.9176	12.8107	12.2161	17.5332	17.3958	15.0451
ENSMUSG00000020745.16	chr11:74564775-74615496	Pafah1b1	protein_coding	MGI:109520	NA	2	4343.36	-0.300471	0.0896317	-3.35228	0.000801477	0.0129576	28.5623	27.8911	23.9997	22.4438	21.1922	21.5538
ENSMUSG00000032220.11	chr9:70114644-70307048	Myo1e	protein_coding	MGI:106621	NA	2	302.428	0.513905	0.153355	3.35108	0.00080498	0.0129764	1.91115	1.63861	1.97913	2.60522	2.10049	3.28666
ENSMUSG00000021500.18	chr13:55782840-55829069	Ddx46	protein_coding	MGI:1920895	NA	2	1595.96	-0.258806	0.0772325	-3.351	0.000805209	0.0129764	10.2362	11.0817	10.9566	8.89815	8.94074	9.17041
ENSMUSG00000032870.9	chr4:120825514-120874444	Smap2	protein_coding	MGI:1917030	ncRNA_host	2	574.903	0.492703	0.147043	3.35075	0.000805939	0.0129764	4.69398	5.6167	5.54381	7.92945	7.61505	6.74592
ENSMUSG00000031099.17	chrX:46898245-46981851	Smarca1	protein_coding	MGI:1935127	NA	2	254.563	-0.918539	0.274285	-3.34885	0.000811469	0.0130476	2.81207	2.5811	1.57059	1.7132	1.2898	0.746641
ENSMUSG00000035407.9	chr4:98643135-98705774	Kank4	protein_coding	MGI:3043381	NA	2	40.4257	1.3941	0.416479	3.34734	0.000815905	0.0131011	0.105219	0.0997958	0.322177	0.392779	0.293287	0.518448
ENSMUSG00000028029.12	chr3:132366242-132390131	Aimp1	protein_coding	MGI:102774	NA	2	1401.9	-0.252905	0.0755928	-3.34563	0.000820966	0.0131645	40.1768	38.1746	30.7146	31.3976	34.1098	25.8649
ENSMUSG00000057649.7	chr13:74085930-74109014	Brd9	protein_coding	MGI:2145317	NA	2	336.013	0.439402	0.13145	3.34273	0.000829586	0.0132846	3.9441	3.4623	4.06565	5.21381	5.59179	4.78154
ENSMUSG00000027087.12	chr2:83554741-83637260	Itgav	protein_coding	MGI:96608	NA	2	801.295	-0.445556	0.133331	-3.34173	0.000832573	0.0133144	3.53311	3.10168	3.75775	2.71969	2.03343	2.91025
ENSMUSG00000075590.5	chr15:75957367-75963476	Nrbp2	protein_coding	MGI:2385017	NA	2	221.762	0.638718	0.19132	3.33847	0.000842404	0.0134534	1.28768	1.39376	2.58382	2.6569	2.17789	3.13023
ENSMUSG00000026123.12	chr1:34889057-34918661	Plekhb2	protein_coding	MGI:2385825	NA	2	2246.07	0.343201	0.102838	3.33729	0.000845991	0.0134924	8.55296	9.6568	9.50074	12.9334	11.8785	10.4269
ENSMUSG00000034656.19	chr8:85065268-85366875	Cacna1a	protein_coding	MGI:109482	NA	2	145.764	1.2491	0.374387	3.3364	0.000848719	0.0135177	0.101016	0.309204	0.457775	0.700895	0.427572	0.727944
ENSMUSG00000025403.6	chr10:127352992-127358313	Shmt2	protein_coding	MGI:1277989	NA	2	732.424	0.327741	0.0982492	3.33581	0.00085051	0.0135279	8.6326	9.24884	10.6578	11.3338	11.9915	12.3495
ENSMUSG00000028452.8	chr4:42979963-43000507	Vcp	protein_coding	MGI:99919	NA	2	13994.8	-0.255032	0.0765921	-3.32974	0.000869264	0.0138076	129.891	117.225	99.2377	97.0189	90.1271	101.416
ENSMUSG00000033751.6	chr8:85558151-85562111	Gadd45gip1	protein_coding	MGI:1914947	NA	2	776.951	0.512545	0.153978	3.32869	0.00087255	0.0138318	8.31432	10.326	10.939	16.5479	16.1332	10.2917
ENSMUSG00000056692.14	chr17:27970209-28039622	Ilrun	protein_coding	MGI:106281	NA	2	11050.7	-0.237722	0.07142	-3.32851	0.000873128	0.0138318	81.7339	91.5157	70.3876	74.34	73.8275	58.6432
ENSMUSG00000033808.17	chr2:120185793-120234594	Tmem87a	protein_coding	MGI:2441844	NA	2	992.848	-0.327818	0.0985083	-3.32782	0.000875275	0.0138413	16.647	12.9168	12.2859	9.59976	11.1308	12.377
ENSMUSG00000006457.5	chr19:4911244-4927937	Actn3	protein_coding	MGI:99678	NA	2	224280	-0.714023	0.214585	-3.32746	0.00087643	0.0138413	3370.15	2751.95	3450.99	1468.13	2382.23	1981.03
ENSMUSG00000083563.2	chr2:22478115-22479659	Gm13340	unprocessed_pseudogene	MGI:3650227	NA	2	2026.85	0.398929	0.119909	3.32694	0.000878042	0.0138413	48.9828	49.3022	30.1768	61.8781	60.5811	44.4898
ENSMUSG00000023456.17	chr6:124787549-124791259	Tpi1	protein_coding	MGI:98797	NA	2	49578.5	-0.314993	0.0946828	-3.32682	0.00087842	0.0138413	1256.82	1171.59	936.868	922.213	999.4	779.822
ENSMUSG00000041629.8	chr11:113552145-113574981	Fam104a	protein_coding	MGI:106351	NA	2	1067.35	-0.273956	0.0823783	-3.32558	0.000882349	0.0138775	18.0889	16.2115	13.3426	13.0379	12.8573	13.182
ENSMUSG00000048482.15	chr2:109505045-109557352	Bdnf	protein_coding	MGI:88145	NA	1	39.0797	1.50409	0.452311	3.32535	0.000883073	0.0138775	0.0405761	0.12595	0.233577	0.408309	0.339306	0.194934
ENSMUSG00000003518.14	chr11:101861969-101877839	Dusp3	protein_coding	MGI:1919599	NA	1	4148.33	-0.383512	0.115393	-3.32354	0.000888831	0.0139399	48.5127	32.6775	30.4612	28.4292	28.9519	26.8069
ENSMUSG00000053198.15	chr7:27196813-27219639	Prx	protein_coding	MGI:108176	NA	2	251.468	1.03703	0.312064	3.32314	0.000890112	0.0139399	0.481262	0.591706	1.36991	1.07764	0.874074	3.63386
ENSMUSG00000047996.17	chrX:77493219-77627502	Prrg1	protein_coding	MGI:1917364	ncRNA_host	2	114.681	-0.665076	0.200144	-3.32299	0.000890587	0.0139399	1.06866	1.11587	1.01468	0.716063	0.845151	0.483086
ENSMUSG00000022098.11	chr14:70711998-70757674	Bmp1	protein_coding	MGI:88176	NA	2	394.629	0.560783	0.168875	3.32069	0.000897938	0.0140364	1.49867	1.55209	2.6354	2.9012	2.0269	3.33125
ENSMUSG00000022419.17	chr15:54975713-55122667	Deptor	protein_coding	MGI:2146322	NA	2	1031.83	-0.557656	0.168032	-3.31876	0.000904184	0.0141153	5.40683	4.2747	6.43073	2.29767	2.86723	6.77938
ENSMUSG00000030814.18	chr7:127260628-127308105	Bcl7c	protein_coding	MGI:1332237	NA	2	532.331	-0.361875	0.109115	-3.31647	0.000911625	0.0142127	3.38817	2.90936	2.53694	2.20532	2.43047	2.1815
ENSMUSG00000042202.16	chr4:155685873-155707797	Slc35e2	protein_coding	MGI:2444240	overlapping_locus	2	343.377	0.96779	0.291867	3.31586	0.000913621	0.014225	0.782802	0.893331	0.986966	1.19578	1.37464	3.08665
ENSMUSG00000028517.9	chr4:105014544-105089961	Plpp3	protein_coding	MGI:1915166	NA	2	1696.44	0.422092	0.127335	3.31481	0.000917051	0.0142596	13.9906	12.2973	21.5759	17.9895	17.8235	27.9857
ENSMUSG00000025234.12	chr9:59295541-59393901	Arih1	protein_coding	MGI:1344363	overlapping_locus	2	3773.22	-0.234713	0.0708201	-3.31421	0.000919012	0.0142713	21.7289	22.122	18.3874	17.4044	17.9033	17.4418
ENSMUSG00000034610.15	chr4:108316623-108416618	Tut4	protein_coding	MGI:2445126	ncRNA_host	2	750.902	-0.488162	0.147389	-3.31207	0.000926071	0.014362	3.4394	4.60868	3.44048	2.78642	2.74403	2.64083
ENSMUSG00000096606.3	chr7:99273289-99276310	Tpbgl	protein_coding	MGI:3646425	NA	2	1016.97	-0.774633	0.233977	-3.31073	0.000930534	0.0144123	14.2742	16.1657	17.0433	13.5618	10.6171	5.34703
ENSMUSG00000040451.19	chr19:32100127-32365912	Sgms1	protein_coding	MGI:2444110	NA	2	1463.55	-0.347855	0.105118	-3.30918	0.000935702	0.0144733	9.03827	8.81507	8.79855	6.87802	8.1425	6.01323
ENSMUSG00000074899.7	chr2:119871974-119916159	Sptbn5	protein_coding	MGI:2685200	NA	1	67.4631	1.47106	0.444648	3.30836	0.000938429	0.0144965	0.0606086	0.0447934	0.228001	0.1862	0.138549	0.501287
ENSMUSG00000036186.6	chr2:26518469-26526509	Dipk1b	protein_coding	MGI:1927576	overlapping_locus	2	66.9136	1.19707	0.362138	3.30557	0.000947836	0.0146195	0.366778	0.404097	0.998279	1.38902	1.18854	1.28013
ENSMUSG00000062963.11	chr1:171116136-171122597	Ufc1	protein_coding	MGI:1913405	NA	2	1062.77	-0.358145	0.10836	-3.30513	0.000949308	0.0146195	44.3748	36.836	35.1385	29.8096	35.1543	25.9275
ENSMUSG00000042323.18	chr14:30741095-30843549	Pbrm1	protein_coding	MGI:1923998	NA	2	1288.55	-0.471821	0.142764	-3.3049	0.000950106	0.0146195	7.07298	6.77678	5.5174	4.3762	4.5891	4.97294
ENSMUSG00000032340.9	chr9:58781970-58943724	Neo1	protein_coding	MGI:1097159	NA	2	1653.72	-0.298405	0.0903935	-3.30118	0.000962793	0.0147665	10.2423	7.71703	8.0267	7.09662	6.29277	7.66018
ENSMUSG00000041408.19	chr14:34395885-34469940	Wapl	protein_coding	MGI:2675859	NA	1	1512.11	-0.355072	0.107564	-3.30104	0.000963284	0.0147665	9.20985	10.4042	7.96327	6.84957	7.12117	7.53051
ENSMUSG00000026553.18	chr1:171910096-171949897	Copa	protein_coding	MGI:1334462	NA	2	3184.24	-0.425965	0.129041	-3.301	0.000963411	0.0147665	26.5116	22.6465	30.3047	19.8873	18.9296	20.2624
ENSMUSG00000026251.14	chr1:87118359-87127792	Chrnd	protein_coding	MGI:87893	NA	2	102.243	0.775015	0.234941	3.29877	0.00097109	0.0148562	0.660371	0.540927	1.61763	1.17898	1.26976	2.08451
ENSMUSG00000038170.16	chr3:97597140-97796023	Pde4dip	protein_coding	MGI:1891434	ncRNA_host	2	146955	-0.320044	0.0970251	-3.29857	0.000971784	0.0148562	425.808	431.111	420.102	327.853	372.547	323.383
ENSMUSG00000046470.6	chr2:181311629-181313433	Sox18	protein_coding	MGI:103559	NA	2	427.094	0.913852	0.277175	3.29702	0.000977149	0.0149189	7.34985	11.4662	7.59068	18.955	14.8862	16.0551
ENSMUSG00000031532.8	chr8:34621717-34637999	Saraf	protein_coding	MGI:1915137	NA	2	4448.34	-0.263099	0.0798247	-3.29596	0.00098085	0.0149561	69.8358	75.8066	69.3152	56.8978	64.7108	57.4733
ENSMUSG00000025016.12	chr19:41199283-41252436	Tm9sf3	protein_coding	MGI:1914262	NA	2	2385.16	-0.246674	0.0748577	-3.29524	0.000983386	0.0149754	12.1021	11.8212	11.3764	9.90195	9.74675	10.1176
ENSMUSG00000000088.8	chr9:57428562-57439709	Cox5a	protein_coding	MGI:88474	NA	2	9314.76	0.257891	0.0783208	3.29275	0.000992121	0.0150693	475.425	534.837	434.854	601.004	609.321	516.222
ENSMUSG00000026827.13	chr2:57127647-57260731	Gpd2	protein_coding	MGI:99778	NA	2	5585.85	-0.547815	0.166388	-3.2924	0.000993354	0.0150693	34.9291	38.3938	33.8548	25.2572	31.5663	17.8978
ENSMUSG00000038188.18	chr11:75404366-75417408	Scarf1	protein_coding	MGI:2449455	NA	1	252.885	0.679899	0.206506	3.29239	0.000993383	0.0150693	2.5864	2.652	2.58989	3.65891	3.96912	4.85438
ENSMUSG00000042662.17	chr2:152782917-152793618	Dusp15	protein_coding	MGI:1934928	NA	2	38.8248	2.0065	0.609882	3.28998	0.00100194	0.0151795	0.102071	0.0502912	0.267891	0.319497	0.188171	1.36512
ENSMUSG00000027452.12	chr2:150460025-150510420	Acss1	protein_coding	MGI:1915988	NA	2	941.172	0.947657	0.288192	3.28829	0.00100799	0.0152337	1.86429	4.46517	13.1928	9.3926	8.50718	10.2067
ENSMUSG00000031543.19	chr8:23464860-23640513	Ank1	protein_coding	MGI:88024	ncRNA_host	2	15611.6	-0.392207	0.119275	-3.28826	0.0010081	0.0152337	74.7295	65.0688	65.8945	50.2927	64.426	43.3852
ENSMUSG00000008429.9	chr9:25019428-25063116	Herpud2	protein_coding	MGI:1915393	NA	2	1177.92	-0.434722	0.132369	-3.28418	0.00102281	0.0154198	15.6019	20.4917	15.8094	14.0451	11.9023	12.4365
ENSMUSG00000042363.15	chr11:20773576-20781056	Lgalsl	protein_coding	MGI:1916114	NA	2	2438.5	-0.37739	0.114914	-3.28412	0.00102302	0.0154198	28.3097	22.232	23.6512	18.8944	19.5875	18.3653
ENSMUSG00000033964.13	chr1:139350026-139380743	Zbtb41	protein_coding	MGI:2444487	NA	2	487.807	-0.481396	0.146725	-3.28095	0.00103458	0.0155667	2.66076	2.53761	2.17381	1.75957	1.63698	1.87557
ENSMUSG00000038648.6	chr6:37304190-37419081	Creb3l2	protein_coding	MGI:2442695	overlapping_locus	2	716.311	-0.40158	0.122406	-3.28073	0.0010354	0.0155667	3.56762	4.46189	4.29322	3.4967	3.17892	2.66243
ENSMUSG00000019158.10	chr7:16186704-16189419	Tmem160	protein_coding	MGI:1916344	NA	2	654.744	-0.31528	0.0961116	-3.28035	0.00103678	0.0155675	33.1968	30.7913	25.9631	24.7141	26.5442	20.9392
ENSMUSG00000064351.1	chrM:5328-6872	mt-Co1	protein_coding	MGI:102504	NA	3	1.08106e+06	0.305328	0.0931789	3.27679	0.00104994	0.015745	25124.6	25549.9	20263	32436.3	34218	22164.7
ENSMUSG00000031451.7	chr8:13515374-13544490	Gas6	protein_coding	MGI:95660	NA	2	2803.45	0.28603	0.0874236	3.27178	0.00106874	0.0160067	30.5922	34.2825	43.35	41.441	46.6583	42.4652
ENSMUSG00000031146.7	chrX:7534180-7537629	Plp2	protein_coding	MGI:1298382	NA	2	317.675	-0.398428	0.121834	-3.27025	0.00107451	0.0160727	9.81139	8.19656	15.5685	6.61739	6.61762	12.7037
ENSMUSG00000026851.10	chr2:30862189-30871953	BC005624	protein_coding	MGI:2385132	NA	2	814.621	-0.271085	0.0829148	-3.26944	0.00107759	0.0160983	17.3684	16.9929	16.1647	13.8265	14.4259	13.5951
ENSMUSG00000031333.8	chrX:103324263-103457452	Abcb7	protein_coding	MGI:109533	overlapping_locus	2	2223.43	-0.282661	0.0864747	-3.26872	0.00108036	0.0161174	17.1201	17.7093	13.6628	14.045	13.4603	12.2116
ENSMUSG00000040350.17	chr11:48716967-48742014	Trim7	protein_coding	MGI:2137353	NA	1	1267.51	0.533721	0.163298	3.2684	0.00108159	0.0161174	7.46714	7.22631	8.73652	12.5659	10.2143	11.044
ENSMUSG00000027165.17	chr2:101391126-101479877	Iftap	protein_coding	MGI:1915420	overlapping_locus	2	1230.48	-0.332017	0.101614	-3.26744	0.00108523	0.0161316	16.1487	17.2854	14.1947	12.3239	14.3896	11.1117
ENSMUSG00000021748.10	chr14:14296748-14303777	Pdhb	protein_coding	MGI:1915513	NA	2	7170.58	0.265903	0.0813798	3.26743	0.00108528	0.0161316	113.595	122.551	102.452	144.648	154.332	111.006
ENSMUSG00000063558.5	chr1:58069090-58145572	Aox1	protein_coding	MGI:88035	NA	2	914.725	0.617171	0.188972	3.26594	0.00109102	0.0161964	5.23573	4.92753	6.29391	7.72019	5.52887	13.4401
ENSMUSG00000035781.15	chr10:79745886-79757042	R3hdm4	protein_coding	MGI:1924814	NA	2	2927.19	-0.325587	0.0997299	-3.26469	0.00109583	0.0162475	51.5815	51.8606	44.7794	37.2601	42.9464	37.7933
ENSMUSG00000007617.19	chr13:93436143-93541637	Homer1	protein_coding	MGI:1347345	NA	1	3161.34	-0.444262	0.136096	-3.26432	0.00109727	0.0162484	13.1102	8.7832	9.31855	7.05629	6.49548	9.34103
ENSMUSG00000036880.11	chr18:74912268-74939279	Acaa2	protein_coding	MGI:1098623	NA	2	4550.84	0.591461	0.181235	3.26351	0.00110042	0.0162747	66.6264	90.9637	100.109	125.043	138.46	120.383
ENSMUSG00000017754.14	chr2:164681438-164699631	Pltp	protein_coding	MGI:103151	NA	2	573.696	0.731891	0.224312	3.26283	0.00110305	0.0162748	5.33104	5.34816	8.97482	12.4194	10.8608	8.87664
ENSMUSG00000020109.14	chr10:59715378-59735124	Dnajb12	protein_coding	MGI:1931881	NA	2	1723.25	-0.290843	0.0891392	-3.2628	0.00110319	0.0162748	19.2734	19.2266	21.0655	15.2761	17.0913	16.3259
ENSMUSG00000028149.13	chr3:138631663-138780962	Rap1gds1	protein_coding	MGI:2385189	NA	2	2175.04	-0.381343	0.116922	-3.26151	0.00110822	0.0163287	19.5723	17.478	17.3343	13.05	14.6756	13.9742
ENSMUSG00000013539.15	chr16:18118689-18165967	Tango2	protein_coding	MGI:101825	ncRNA_host	2	829.991	0.574819	0.176294	3.26057	0.00111187	0.0163442	10.7331	9.17753	13.1595	17.1124	17.7381	14.8294
ENSMUSG00000013698.13	chr1:172024295-172034371	Pea15a	protein_coding	MGI:104799	NA	2	805.484	0.41813	0.128257	3.26009	0.00111376	0.0163442	6.31233	6.81339	7.66511	9.43102	7.6559	10.8271
ENSMUSG00000040396.13	chr8:10027707-10042155	Abhd13	protein_coding	MGI:1916154	NA	2	306.268	-0.383837	0.117742	-3.25998	0.00111421	0.0163442	3.00323	2.77386	2.2558	1.96393	2.11212	2.02334
ENSMUSG00000015337.6	chr2:30061505-30064081	Endog	protein_coding	MGI:1261433	NA	2	959.694	0.260911	0.0800383	3.25982	0.00111482	0.0163442	30.091	32.1251	27.1763	38.4008	41.1589	28.502
ENSMUSG00000028780.14	chr5:17779279-17935266	Sema3c	protein_coding	MGI:107557	overlapping_locus	1	1436.06	-0.549995	0.168788	-3.25849	0.00112006	0.0164007	10.6859	13.2146	9.99881	7.95594	7.50314	7.73608
ENSMUSG00000022707.17	chr16:70110837-70366604	Gbe1	protein_coding	MGI:1921435	NA	2	2733.96	0.432658	0.132854	3.25663	0.00112742	0.016488	16.2544	24.4246	16.2043	31.0882	26.4757	19.0914
ENSMUSG00000020594.15	chr12:8724134-8802581	Pum2	protein_coding	MGI:1931751	NA	1	3280.97	-0.207862	0.0638376	-3.25611	0.00112949	0.0164979	18.8066	19.1845	16.7839	16.113	15.6742	15.5929
ENSMUSG00000057897.15	chr11:5919644-6016362	Camk2b	protein_coding	MGI:88257	NA	2	6676.8	-0.31871	0.0979504	-3.25379	0.00113877	0.0166093	34.9877	29.9436	22.8382	25.5529	25.1181	19.2577
ENSMUSG00000040136.11	chr7:45753947-45829441	Abcc8	protein_coding	MGI:1352629	NA	2	90.9985	-0.892263	0.274247	-3.2535	0.00113994	0.0166093	0.472209	0.870198	0.975268	0.368178	0.387129	0.427709
ENSMUSG00000018846.9	chr11:35660311-35682112	Pank3	protein_coding	MGI:2387464	ncRNA_host	2	782.011	-0.321325	0.0987781	-3.253	0.00114194	0.016618	3.60472	3.6979	4.18882	3.08071	2.67278	3.49251
ENSMUSG00000032845.17	chr18:65398600-65527137	Alpk2	protein_coding	MGI:2449492	NA	2	2693.03	0.423558	0.130292	3.25083	0.00115068	0.0167245	9.36791	12.5095	10.5693	13.9288	16.5287	13.0973
ENSMUSG00000025609.16	chr6:31375670-31493746	Mkln1	protein_coding	MGI:1351638	overlapping_locus	2	2248.13	-0.231603	0.0712664	-3.24983	0.00115476	0.0167632	8.69807	8.3012	6.55898	6.81314	6.9452	6.18357
ENSMUSG00000049421.14	chr7:29794202-29807047	Zfp260	protein_coding	MGI:1347071	NA	2	973.267	-0.287162	0.0884619	-3.24617	0.00116969	0.0169591	11.0235	10.4024	8.40962	8.0807	8.34431	7.85552
ENSMUSG00000030609.19	chr7:78545602-78560957	Aen	protein_coding	MGI:1915298	NA	2	1256.14	-0.353236	0.108899	-3.2437	0.00117987	0.0170658	10.1931	8.21894	8.31937	7.90485	6.59488	6.42274
ENSMUSG00000034614.15	chr11:3280401-3292971	Pik3ip1	protein_coding	MGI:1917016	NA	2	972.88	-0.726662	0.224024	-3.24368	0.00117994	0.0170658	11.6941	7.76264	13.3713	6.23656	6.97435	6.72412
ENSMUSG00000030869.12	chr7:121684626-121701109	Ndufab1	protein_coding	MGI:1917566	NA	2	5133.1	0.318247	0.0981462	3.24258	0.00118453	0.0171111	35.2761	41.0678	33.1079	46.6435	52.063	38.1776
ENSMUSG00000079509.11	chrX:93118237-93167308	Zfx	protein_coding	MGI:99211	NA	2	517.021	-0.470843	0.145276	-3.24102	0.00119102	0.0171839	2.96858	3.05522	2.55092	1.84932	2.09082	2.24906
ENSMUSG00000033732.11	chr8:111536871-111573408	Sf3b3	protein_coding	MGI:1289341	ncRNA_host	2	610.998	0.344022	0.106185	3.23985	0.00119591	0.0172334	3.66825	3.75895	5.09369	4.81362	5.1395	5.81659
ENSMUSG00000038774.10	chr10:50468765-50727581	Ascc3	protein_coding	MGI:1925237	NA	2	628.029	-0.377804	0.116678	-3.23802	0.00120364	0.0173133	3.27522	3.06436	2.59251	2.25261	2.02635	2.59312
ENSMUSG00000034341.18	chr11:115969399-115977821	Wbp2	protein_coding	MGI:104709	NA	2	1864.59	-0.264833	0.0817933	-3.23784	0.00120439	0.0173133	22.0898	22.6752	24.0697	18.0422	20.3457	18.8775
ENSMUSG00000055538.8	chr14:25712066-25769463	Zcchc24	protein_coding	MGI:1919168	NA	2	2555.71	-0.435116	0.134466	-3.23589	0.00121266	0.017393	22.5352	17.1391	25.5122	16.6072	14.2389	17.1264
ENSMUSG00000116924.2	chr17:15852025-15861366	4933401D09Rik	lncRNA	MGI:1918258	NA	2	41.0416	-1.34498	0.415651	-3.23583	0.00121288	0.017393	1.27145	1.5628	1.1928	0.592739	0.80991	0.283253
ENSMUSG00000029344.16	chr5:112424557-112463227	Tpst2	protein_coding	MGI:1309516	NA	2	563.219	0.418115	0.129263	3.23461	0.00121809	0.0174337	6.69449	7.32035	7.86948	9.92871	8.83099	10.4108
ENSMUSG00000066058.12	chr4:119112611-119119635	Cldn19	protein_coding	MGI:3033992	NA	2	49.0816	1.51749	0.469184	3.23433	0.00121929	0.0174337	0.0355048	0.142863	0.34064	0.278523	0.226034	1.0278
ENSMUSG00000020717.20	chr11:106545043-106641454	Pecam1	protein_coding	MGI:97537	NA	2	1929.52	0.406522	0.125705	3.23393	0.00122098	0.0174337	13.3454	17.166	15.4372	23.4453	19.1855	18.1686
ENSMUSG00000041235.13	chr4:8690470-8867659	Chd7	protein_coding	MGI:2444748	NA	2	1295.67	-0.460524	0.142415	-3.23368	0.00122206	0.0174337	5.85328	5.27705	3.74233	3.33847	3.67459	3.68166
ENSMUSG00000017485.12	chr14:6034301-6104584	Top2b	protein_coding	MGI:98791	NA	1	1297.27	-0.306684	0.0948476	-3.23344	0.00122311	0.0174337	5.5749	5.43826	4.84602	4.29039	4.37953	4.13725
ENSMUSG00000027199.15	chr2:122424948-122441784	Gatm	protein_coding	MGI:1914342	NA	2	91.9325	0.850793	0.263227	3.23217	0.00122855	0.0174761	0.524533	0.536026	1.13022	0.69368	0.962691	2.78797
ENSMUSG00000023150.15	chr1:151220228-151240173	Ivns1abp	protein_coding	MGI:2152389	NA	2	5306.19	0.408696	0.126451	3.23205	0.00122905	0.0174761	32.5179	27.6619	31.6016	41.7113	37.3128	42.2064
ENSMUSG00000034640.10	chr3:65435831-65462939	Tiparp	protein_coding	MGI:2159210	NA	2	921.462	-0.672839	0.208298	-3.23017	0.00123715	0.0175702	4.79286	5.23061	8.10348	3.1191	3.27477	4.93427
ENSMUSG00000039633.8	chr8:36683218-36716670	Lonrf1	protein_coding	MGI:3609241	NA	2	306.445	-0.844369	0.26145	-3.22957	0.00123977	0.0175862	4.05673	3.59749	3.80509	1.58354	2.47837	2.23768
ENSMUSG00000016356.19	chr2:180628328-180660156	Col20a1	protein_coding	MGI:1920618	overlapping_locus	1	90.0477	0.742626	0.229974	3.22917	0.00124151	0.0175862	0.32379	0.423006	0.727053	0.676808	0.622961	1.05757
ENSMUSG00000024168.9	chr17:25276676-25302565	Tmem204	protein_coding	MGI:3039635	NA	2	338.729	0.633015	0.196048	3.22888	0.00124274	0.0175862	2.69447	4.82948	4.76833	6.38764	6.38476	5.98491
ENSMUSG00000005125.14	chr15:66801167-66841489	Ndrg1	protein_coding	MGI:1341799	NA	2	599.079	0.605701	0.187678	3.22735	0.00124944	0.0176598	3.44883	4.2463	6.8065	6.99085	5.32517	9.39655
ENSMUSG00000025608.10	chr6:31496423-31540916	Podxl	protein_coding	MGI:1351317	overlapping_locus	2	1500.85	0.588177	0.182271	3.22693	0.00125124	0.017664	7.87858	6.88833	11.7495	15.9355	11.7164	11.6812
ENSMUSG00000027716.14	chr3:36674631-36744316	Trpc3	protein_coding	MGI:109526	NA	2	148.834	0.969427	0.300506	3.22598	0.0012554	0.0176915	0.969712	0.989215	1.36334	2.93716	3.17956	1.16088
ENSMUSG00000025428.16	chr18:77861429-77870569	Atp5a1	protein_coding	MGI:88115	NA	2	72068.8	0.218655	0.0677829	3.22581	0.00125618	0.0176915	855.084	928.864	738.649	1051.85	1090.44	805.529
ENSMUSG00000030042.16	chr6:82595973-82682346	Pole4	protein_coding	MGI:1914229	NA	2	775.317	-0.433608	0.134508	-3.22367	0.00126559	0.0177899	13.6939	13.6106	12.339	11.0802	10.141	8.22378
ENSMUSG00000038838.16	chr17:35966526-35978484	Vars2	protein_coding	MGI:1916165	NA	2	407.947	0.511714	0.158743	3.22354	0.00126619	0.0177899	2.55995	2.86947	2.64549	3.63552	3.90367	3.94836
ENSMUSG00000027776.13	chr3:68597977-68605880	Il12a	protein_coding	MGI:96539	NA	2	65.6302	-1.28696	0.399601	-3.22063	0.0012791	0.01795	2.83564	1.23838	3.47306	0.806904	0.779383	1.58775
ENSMUSG00000020869.9	chr11:94520593-94536042	Lrrc59	protein_coding	MGI:2138133	NA	2	1253.28	-0.297177	0.0923006	-3.21966	0.00128341	0.0179729	16.3432	18.5385	16.9349	13.4793	14.2377	14.3707
ENSMUSG00000029648.14	chr5:147498414-147662821	Flt1	protein_coding	MGI:95558	NA	1	2227.46	0.429387	0.133367	3.21958	0.00128378	0.0179729	4.12922	5.64477	5.85766	7.07655	6.18075	7.57345
ENSMUSG00000022048.9	chr14:67040313-67106137	Dpysl2	protein_coding	MGI:1349763	NA	2	152.803	0.687715	0.213645	3.21897	0.00128652	0.01799	0.892962	0.808442	1.12103	1.72105	1.17538	1.63622
ENSMUSG00000032812.19	chr7:100997274-101061793	Arap1	protein_coding	MGI:1916960	overlapping_locus	2	543.005	0.484754	0.150609	3.21863	0.00128805	0.01799	1.56149	2.24009	2.6132	2.7856	2.39374	3.77653
ENSMUSG00000025757.14	chr3:40699814-40750538	Hspa4l	protein_coding	MGI:107422	NA	2	540.097	1.06441	0.330933	3.21641	0.00129807	0.0181086	0.976059	1.12963	0.856644	2.04164	1.33636	3.60703
ENSMUSG00000036202.17	chr2:51962844-52012395	Rif1	protein_coding	MGI:1098622	NA	2	663.492	-0.406692	0.126582	-3.21286	0.0013142	0.0182904	3.0574	2.74147	2.71748	2.09345	1.82752	2.55984
ENSMUSG00000008763.17	chr3:100469524-100592819	Man1a2	protein_coding	MGI:104676	NA	1	559.588	-0.323998	0.100844	-3.21286	0.00131421	0.0182904	2.88697	2.65848	2.57053	2.05511	2.11114	2.30846
ENSMUSG00000040485.6	chr1:167273238-167294349	Lrrc52	protein_coding	MGI:1924118	NA	2	127.303	1.30479	0.406265	3.21166	0.00131972	0.0183455	0.176561	0.723129	4.81156	1.71939	1.89112	3.6974
ENSMUSG00000032076.21	chr9:47441471-47769413	Cadm1	protein_coding	MGI:1889272	NA	2	114.008	-0.660076	0.205565	-3.21103	0.00132261	0.018364	0.635719	0.469835	0.864184	0.317475	0.295695	0.722863
ENSMUSG00000055839.7	chr17:24043712-24048110	Elob	protein_coding	MGI:1914923	NA	2	1705.95	-0.396427	0.123542	-3.20884	0.00133271	0.0184826	63.4807	66.148	77.9094	46.3346	54.2826	56.5543
ENSMUSG00000025579.15	chr11:119158713-119176280	Gaa	protein_coding	MGI:95609	NA	2	6340.08	-0.361501	0.112733	-3.2067	0.00134266	0.0185924	55.3784	48.6588	54.7524	36.0636	40.243	47.7519
ENSMUSG00000023277.14	chr9:106080307-106092588	Twf2	protein_coding	MGI:1346078	NA	2	3439.04	0.688304	0.214662	3.20646	0.00134378	0.0185924	42.4049	73.4699	43.9573	103.783	79.6074	73.2284
ENSMUSG00000032966.15	chr2:151384403-151403612	Fkbp1a	protein_coding	MGI:95541	NA	2	2578.9	-0.246281	0.0768353	-3.20531	0.00134917	0.0186451	48.1226	45.7617	50.3651	40.4899	38.5569	42.6284
ENSMUSG00000031751.15	chr8:94698216-94739470	Amfr	protein_coding	MGI:1345634	NA	2	5192.66	-0.196562	0.0613417	-3.20438	0.00135353	0.0186627	52.6905	50.7684	45.3075	43.1955	44.489	41.8947
ENSMUSG00000032002.11	chr9:7184520-7208205	Dcun1d5	protein_coding	MGI:1924113	NA	2	1392.46	-0.322698	0.100709	-3.20426	0.0013541	0.0186627	17.4752	25.2765	16.6786	17.8891	17.527	12.1758
ENSMUSG00000033429.11	chr7:64042355-64061873	Mcee	protein_coding	MGI:1920974	NA	2	639.881	0.352443	0.110018	3.2035	0.00135769	0.0186627	18.946	24.9817	22.2676	29.1654	31.5728	24.021
ENSMUSG00000041737.9	chr9:31337492-31375758	Tmem45b	protein_coding	MGI:2384574	NA	2	34.6415	-3.32719	1.03863	-3.20344	0.00135796	0.0186627	0.469324	0.0449632	2.33123	0.0423182	0	0.690544
ENSMUSG00000039372.6	chr1:72466271-72576089	Marchf4	protein_coding	MGI:2683550	NA	2	35.0535	-1.22091	0.381134	-3.20336	0.00135835	0.0186627	0.476488	0.630601	0.298585	0.25179	0.383235	0.0614255
ENSMUSG00000038644.15	chr7:44182170-44198271	Pold1	protein_coding	MGI:97741	ncRNA_host	2	178.76	0.636213	0.19872	3.20155	0.00136689	0.0187582	1.31137	1.3374	1.82203	2.04829	2.44561	2.37966
ENSMUSG00000095742.2	JH584295.1:66-1479	ENSMUSG00000095742	protein_coding	NA	NA	3	703.941	-0.431716	0.134979	-3.1984	0.00138191	0.018929	127.273	124.419	112.398	87.109	94.2042	88.1083
ENSMUSG00000028464.17	chr4:43514711-43523765	Tpm2	protein_coding	MGI:98810	NA	2	139339	0.441107	0.137921	3.19827	0.00138255	0.018929	1523.77	1818.24	1091.38	2324.6	2088.03	1576.19
ENSMUSG00000000171.6	chr9:50507657-50515112	Sdhd	protein_coding	MGI:1914175	NA	2	6663.28	0.299916	0.0938382	3.19609	0.00139302	0.0190503	182.997	183.655	163.645	237.609	239.315	180.843
ENSMUSG00000006219.13	chr4:141303373-141333407	Fblim1	protein_coding	MGI:1921452	NA	2	55.1882	1.18942	0.372255	3.19516	0.00139751	0.0190735	0.158477	0.204967	0.284219	0.560358	0.257097	0.662346
ENSMUSG00000040859.15	chr4:129355374-129382291	Bsdc1	protein_coding	MGI:1913466	NA	2	1269.37	-0.296306	0.0927385	-3.19507	0.00139795	0.0190735	15.4222	15.2874	16.0916	12.3991	12.816	12.9003
ENSMUSG00000031204.4	chrX:94513807-94601593	Asb12	protein_coding	MGI:1917642	NA	2	751.104	-0.534114	0.167186	-3.19473	0.00139964	0.0190745	18.2629	28.3281	16.0299	17.0553	14.6879	11.3264
ENSMUSG00000032125.22	chr9:37313193-37326411	Robo4	protein_coding	MGI:1921394	NA	2	491.951	0.483227	0.151276	3.19435	0.00140148	0.0190776	2.21257	2.80307	2.88821	4.2132	3.28102	3.49057
ENSMUSG00000036087.19	chr5:73071647-73136172	Slain2	protein_coding	MGI:1923241	NA	2	4410.86	-0.205498	0.0643561	-3.19315	0.00140732	0.019135	37.3744	37.9922	31.5951	30.9802	30.9109	30.6189
ENSMUSG00000016541.11	chr15:85220446-85347413	Atxn10	protein_coding	MGI:1859293	NA	2	604.135	0.401946	0.125965	3.19094	0.00141812	0.0191991	8.36097	7.52356	12.4416	11.858	11.2534	13.7806
ENSMUSG00000060600.16	chr11:70548028-70553339	Eno3	protein_coding	MGI:95395	NA	1	144795	-0.327286	0.102576	-3.19067	0.00141944	0.0191991	3481.51	3622.33	3071.78	2865.15	3190.82	2143.5
ENSMUSG00000031818.13	chr8:121394961-121400946	Cox4i1	protein_coding	MGI:88473	overlapping_locus	2	19893.5	0.231081	0.0724269	3.19054	0.00142006	0.0191991	732.032	823.371	668.078	900.699	931.454	775.937
ENSMUSG00000062908.13	chr3:153627994-153650269	Acadm	protein_coding	MGI:87867	NA	2	10471.5	0.399395	0.125182	3.19051	0.0014202	0.0191991	133.851	154.624	165.362	193.955	209.408	193.298
ENSMUSG00000021009.16	chr12:98643000-98703664	Ptpn21	protein_coding	MGI:1344406	NA	2	1680.04	-0.39158	0.122739	-3.19033	0.00142109	0.0191991	12.2673	11.2943	9.73086	7.85719	8.39762	9.0972
ENSMUSG00000079658.10	chr1:16711949-16727266	Eloc	protein_coding	MGI:1915173	NA	2	1756.7	-0.270274	0.0847202	-3.19019	0.00142179	0.0191991	26.3905	28.3264	26.488	23.1012	23.2682	21.1306
ENSMUSG00000023845.8	chr17:17741672-17845309	Lnpep	protein_coding	MGI:2387123	NA	2	1726.16	-0.453552	0.142241	-3.18861	0.00142958	0.0192822	4.79308	6.82087	5.31153	3.96407	4.206	4.1484
ENSMUSG00000019864.15	chr10:43777803-43833197	Rtn4ip1	protein_coding	MGI:2178759	NA	2	873.401	0.425864	0.133581	3.18806	0.0014323	0.0192969	5.90494	6.43836	6.16713	9.10741	9.48727	6.59156
ENSMUSG00000020847.16	chr11:75721825-75829255	Rph3al	protein_coding	MGI:1923492	NA	2	248.173	-0.482038	0.151307	-3.18582	0.00144343	0.0194065	2.87052	2.98833	2.06572	2.16845	1.90507	1.58061
ENSMUSG00000078578.10	chr3:135143910-135173959	Ube2d3	protein_coding	MGI:1913355	NA	2	8038.71	-0.248654	0.0780515	-3.18576	0.00144373	0.0194065	67.5539	70.0441	55.9872	54.2306	53.9316	54.2987
ENSMUSG00000031422.17	chrX:135633691-135644439	Morf4l2	protein_coding	MGI:1927167	NA	2	2755.53	-0.328436	0.103136	-3.18451	0.00145001	0.0194576	35.4212	34.8154	32.0794	25.6758	25.8351	30.2518
ENSMUSG00000048706.4	chr4:80828883-80873865	Lurap1l	protein_coding	MGI:106510	NA	2	41.525	1.12338	0.352781	3.18434	0.00145083	0.0194576	0.362019	0.28377	0.413166	0.507446	0.679525	1.19595
ENSMUSG00000037949.9	chr9:122004940-122123489	Ano10	protein_coding	MGI:2143103	ncRNA_host	2	938.262	-0.386058	0.121282	-3.18314	0.00145687	0.0194934	6.23184	5.76345	6.1323	4.09429	4.83841	4.94247
ENSMUSG00000020774.10	chr11:73195818-73220422	Aspa	protein_coding	MGI:87914	NA	2	139.784	0.803069	0.25231	3.18286	0.00145828	0.0194934	2.08268	1.1501	2.13526	2.98146	3.27347	2.96908
ENSMUSG00000030612.7	chr7:78424984-78433279	Mrpl46	protein_coding	MGI:1914558	overlapping_locus	2	429.527	0.359258	0.112874	3.18283	0.00145846	0.0194934	10.2331	10.1761	8.97424	12.2105	13.9693	11.4416
ENSMUSG00000020111.16	chr10:59538299-59699954	Micu1	protein_coding	MGI:2384909	overlapping_locus	2	1635.95	0.244596	0.0769866	3.17712	0.00148745	0.0198584	16.2441	15.1928	16.5338	18.0862	18.4068	20.3325
ENSMUSG00000020954.17	chr12:51656415-51738680	Strn3	protein_coding	MGI:2151064	NA	2	5005.37	-0.334121	0.105232	-3.17508	0.00149794	0.019976	72.195	73.2529	56.6272	56.4975	49.7847	53.4042
ENSMUSG00000068735.15	chr2:93017893-93032104	Trp53i11	protein_coding	MGI:2670995	NA	2	271.254	0.723874	0.228059	3.17406	0.00150324	0.020024	3.008	3.43064	1.3397	6.16917	5.25091	1.91163
ENSMUSG00000020432.13	chr11:3867192-3882159	Tcn2	protein_coding	MGI:98534	NA	2	411.553	0.353431	0.111472	3.17057	0.00152141	0.0202432	5.48999	5.93208	7.0078	7.91412	7.52109	8.0611
ENSMUSG00000029776.12	chr6:52523213-52617374	Hibadh	protein_coding	MGI:1889802	ncRNA_host	2	3538.96	0.344451	0.108664	3.16987	0.00152507	0.0202688	55.622	66.9572	66.9909	81.2801	92.8266	67.7339
ENSMUSG00000028420.14	chr4:53826045-53862019	Tmem38b	protein_coding	MGI:1098718	ncRNA_host	2	1689.42	-0.346794	0.109414	-3.16955	0.00152677	0.0202688	19.5872	16.1118	18.4958	12.7658	14.1536	15.6801
ENSMUSG00000062604.12	chr5:23708262-23889615	Srpk2	protein_coding	MGI:1201408	ncRNA_host	2	929.418	-0.270238	0.0852802	-3.16882	0.00153058	0.0202965	4.61521	3.70785	4.39527	3.22923	3.26082	4.08109
ENSMUSG00000071324.12	chr10:41790986-41894438	Armc2	protein_coding	MGI:1916449	NA	2	27.7398	2.29012	0.722987	3.16758	0.00153713	0.0203605	0.0257892	0.0370607	0.173725	0.655756	0.638978	0.0423574
ENSMUSG00000017817.12	chr2:163178162-163239913	Jph2	protein_coding	MGI:1891496	NA	2	25339.3	-0.360054	0.113753	-3.16523	0.00154959	0.0205025	292.363	250.869	222.994	195.621	215.277	183.548
ENSMUSG00000028980.15	chr4:150063932-150093480	H6pd	protein_coding	MGI:2140356	NA	1	1223.33	-0.333872	0.105492	-3.1649	0.00155135	0.0205028	9.85728	7.44418	9.91339	5.45801	5.75966	11.4541
ENSMUSG00000063268.13	chr15:76115374-76127641	Parp10	protein_coding	MGI:3712326	overlapping_locus	2	238.044	0.592313	0.187206	3.16396	0.00155639	0.0205464	1.88955	2.27207	2.14112	3.87002	3.4768	2.38304
ENSMUSG00000047747.11	chr8:83589985-83817897	Rnf150	protein_coding	MGI:2443860	NA	2	2266.03	-0.368144	0.116413	-3.16239	0.00156481	0.0206346	5.65914	4.56162	4.95473	4.04395	3.4332	4.28396
ENSMUSG00000030557.18	chr7:66880911-67022606	Mef2a	protein_coding	MGI:99532	NA	2	4114.09	-0.291309	0.092156	-3.16104	0.00157208	0.0207072	34.1156	26.1845	24.472	24.9525	22.1874	21.5176
ENSMUSG00000102869.3	chr2:156229985-156234899	Norad	lncRNA	MGI:1914767	NA	2	8351.19	-0.322717	0.102123	-3.16007	0.00157731	0.0207374	66.0448	69.7712	74.567	58.8528	54.523	55.2133
ENSMUSG00000032437.11	chr9:115071649-115139489	Stt3b	protein_coding	MGI:1915542	overlapping_locus	2	2599.43	-0.304418	0.096336	-3.15996	0.00157788	0.0207374	25.6027	23.1062	22.9475	16.965	16.8066	25.1334
ENSMUSG00000006998.17	chr16:20470402-20482164	Psmd2	protein_coding	MGI:1096584	NA	2	8363.73	-0.279482	0.0884652	-3.15923	0.00158187	0.0207667	103.251	101.293	88.5829	77.3583	80.7055	82.8221
ENSMUSG00000022811.18	chr16:33201206-33324733	Zfp148	protein_coding	MGI:1332234	NA	2	800.265	-0.379375	0.120119	-3.15833	0.00158677	0.0208078	3.52287	3.48585	2.61564	2.62621	2.39785	2.32842
ENSMUSG00000020354.16	chr11:46787080-47879796	Sgcd	protein_coding	MGI:1346525	ncRNA_host	2	826.959	-0.734976	0.232807	-3.15702	0.00159389	0.0208741	5.16316	5.89544	3.1357	2.87101	2.05327	3.579
ENSMUSG00000022340.16	chr15:44535252-44651459	Sybu	protein_coding	MGI:2442392	NA	2	44.8378	1.57627	0.499333	3.15675	0.00159536	0.0208741	0.072056	0.146851	0.196565	0.621958	0.344893	0.278387
ENSMUSG00000050812.19	chr4:58798911-58912749	Ecpas	protein_coding	MGI:2140220	NA	2	10210.2	-0.317972	0.100771	-3.15539	0.00160285	0.0209489	36.6085	38.5159	32.5864	31.0139	30.9388	24.7032
ENSMUSG00000022710.18	chr16:8507459-8610172	Usp7	protein_coding	MGI:2182061	ncRNA_host	2	2213.41	-0.226377	0.0717715	-3.15413	0.00160975	0.0209996	17.3208	17.5805	15.5349	14.7043	14.4168	13.9442
ENSMUSG00000020216.14	chr10:80644330-80649332	Jsrp1	protein_coding	MGI:1916700	NA	2	8279.49	-0.254696	0.0807523	-3.15404	0.00161029	0.0209996	234.359	257.846	231.737	202.411	196.386	207.544
ENSMUSG00000025137.16	chr11:120500913-120508762	Pcyt2	protein_coding	MGI:1915921	NA	2	710.14	0.422067	0.133947	3.15099	0.00162715	0.0211802	10.0905	11.4277	13.7675	15.2952	19.7817	12.4459
ENSMUSG00000021702.8	chr13:92888098-92931326	Thbs4	protein_coding	MGI:1101779	NA	2	1516.08	-0.679727	0.215725	-3.15089	0.00162773	0.0211802	20.0358	11.5216	25.3801	10.9719	6.87309	18.2482
ENSMUSG00000032648.15	chr19:6434429-6448489	Pygm	protein_coding	MGI:97830	NA	2	189089	-0.441637	0.14021	-3.14983	0.00163365	0.0212338	2619.06	2308.66	2821.2	1691.74	1950.34	2057.64
ENSMUSG00000020366.19	chr11:49737578-49777248	Mapk9	protein_coding	MGI:1346862	NA	2	1705.39	-0.316762	0.100586	-3.14918	0.00163727	0.0212575	10.6943	10.0996	9.79641	8.11133	8.86008	7.5854
ENSMUSG00000025813.15	chr7:81250229-81357275	Homer2	protein_coding	MGI:1347354	NA	2	1273.66	1.03999	0.330435	3.14735	0.00164759	0.021365	0.719548	3.28823	3.31954	4.34376	4.37864	4.74452
ENSMUSG00000040550.18	chr4:14809498-14826587	Otud6b	protein_coding	MGI:1919451	NA	2	2264.13	-0.24149	0.0767351	-3.14707	0.00164917	0.021365	26.6934	30.5297	23.7906	23.0886	24.9125	20.4136
ENSMUSG00000053436.16	chr17:28910303-28967380	Mapk14	protein_coding	MGI:1346865	NA	2	3342.64	-0.243194	0.0772845	-3.14674	0.00165102	0.0213655	38.16	31.7242	26.9823	26.6854	27.8813	26.4285
ENSMUSG00000050271.13	chr8:36561982-36614941	Prag1	protein_coding	MGI:1196223	NA	2	118.127	0.966849	0.30732	3.14606	0.00165484	0.0213915	0.591073	0.482343	0.98249	1.55035	1.41655	1.05315
ENSMUSG00000027763.14	chr3:60380251-60537171	Mbnl1	protein_coding	MGI:1928482	NA	1	10381.3	-0.478123	0.152061	-3.14428	0.00166493	0.0214984	68.1796	59.6267	58.622	38.8955	51.2479	43.4334
ENSMUSG00000041607.18	chr18:82493271-82603762	Mbp	protein_coding	MGI:96925	NA	2	476.886	1.13232	0.360192	3.14366	0.0016685	0.0215209	0.524242	0.539343	1.42645	1.05874	0.876396	4.825
ENSMUSG00000044252.19	chr18:12888371-13074898	Osbpl1a	protein_coding	MGI:1927551	NA	1	1333.69	0.406985	0.129559	3.14132	0.00168189	0.0216699	6.82979	6.49272	6.18224	9.2013	9.07762	7.70562
ENSMUSG00000026755.15	chr2:38895360-38905889	Arpc5l	protein_coding	MGI:1921442	overlapping_locus	2	2381.22	-0.247458	0.0787973	-3.14043	0.00168698	0.0217067	22.9941	22.3216	17.1244	18.2687	19.9982	14.3075
ENSMUSG00000009418.17	chr1:135362318-135615843	Nav1	protein_coding	MGI:2183683	ncRNA_host	2	373.452	0.665184	0.21183	3.14018	0.00168842	0.0217067	0.672324	0.700475	0.840611	1.39811	0.892917	1.21641
ENSMUSG00000032399.9	chr9:64080657-64085948	Rpl4	protein_coding	MGI:1915141	ncRNA_host	2	12011.9	-0.286157	0.0911533	-3.13929	0.00169357	0.0217349	272.042	323.69	291.972	227.076	263.307	237.039
ENSMUSG00000004789.11	chr12:85157607-85181619	Dlst	protein_coding	MGI:1926170	NA	2	9501.71	0.356279	0.113505	3.13889	0.00169588	0.0217349	78.8841	84.1721	78.644	109.758	112.107	89.0732
ENSMUSG00000046410.11	chr7:28921351-28931940	Kcnk6	protein_coding	MGI:1891291	NA	2	55.1297	1.02601	0.326881	3.1388	0.00169644	0.0217349	0.158005	0.272476	0.282842	0.463579	0.47054	0.50905
ENSMUSG00000034751.18	chr13:102868994-103471005	Mast4	protein_coding	MGI:1918885	overlapping_locus	2	1595.81	-0.427971	0.13636	-3.13853	0.00169798	0.0217349	4.54815	3.88795	4.73435	3.5115	3.28745	2.97549
ENSMUSG00000109372.2	chr8:36232944-36285201	Gm19410	protein_coding	MGI:5011595	NA	2	45.1155	1.50613	0.48014	3.13685	0.00170774	0.0218361	0.0158855	0.226002	0.306438	0.412523	0.434593	0.337553
ENSMUSG00000021096.12	chr12:72804229-72846593	Ppm1a	protein_coding	MGI:99878	NA	2	5594.42	-0.211797	0.0675603	-3.13493	0.00171892	0.0219235	28.6704	28.3144	23.5871	24.2285	25.2408	20.1143
ENSMUSG00000063388.6	chr18:60574837-60576052	BC023105	processed_pseudogene	MGI:2384767	NA	2	633.277	-0.752125	0.239925	-3.13483	0.00171952	0.0219235	26.9688	10.7324	28.7878	4.68015	6.83195	49.1672
ENSMUSG00000026610.14	chr1:187340988-187947082	Esrrg	protein_coding	MGI:1347056	NA	1	833.285	0.498525	0.159033	3.13473	0.00172015	0.0219235	2.77943	3.94516	5.2407	6.10714	5.04244	5.20077
ENSMUSG00000005354.17	chr15:77799247-77813206	Txn2	protein_coding	MGI:1929468	NA	1	3721.29	0.297074	0.0948165	3.13315	0.00172941	0.0220178	27.9118	29.8765	28.4811	37.3915	36.0131	32.6622
ENSMUSG00000032050.19	chr9:51958473-52011763	Rdx	protein_coding	MGI:97887	NA	2	5398.56	-0.257334	0.0821792	-3.13138	0.00173986	0.022127	46.5714	52.8145	37.5828	41.2111	41.5243	31.7968
ENSMUSG00000022972.11	chr16:90722697-90732002	Cfap298	protein_coding	MGI:1915251	NA	2	618.413	-0.360207	0.115076	-3.13016	0.0017471	0.0221951	18.5242	18.9811	12.5424	13.0477	14.8143	10.7264
ENSMUSG00000023027.14	chr15:100125700-100159125	Atf1	protein_coding	MGI:1298366	NA	2	1171.93	-0.276171	0.0882864	-3.12812	0.00175927	0.0223258	17.4427	17.2919	15.2873	13.7994	14.7588	12.6868
ENSMUSG00000000384.16	chr11:6565598-6576067	Tbrg4	protein_coding	MGI:1100868	ncRNA_host	2	1484.54	0.297616	0.0951595	3.12755	0.00176271	0.0223453	16.7482	17.9354	15.5279	21.1672	23.4144	17.3881
ENSMUSG00000020357.4	chr11:49500090-49543566	Flt4	protein_coding	MGI:95561	NA	2	249.644	0.712767	0.227926	3.12719	0.00176483	0.0223483	0.686426	0.77682	0.769416	1.27822	1.00286	1.38914
ENSMUSG00000030731.14	chr7:44033526-44049611	Syt3	protein_coding	MGI:99665	NA	2	158.326	-0.884375	0.283	-3.125	0.00177808	0.0224765	3.00966	1.93931	2.20974	1.69392	1.62872	0.797293
ENSMUSG00000027366.13	chr2:126732311-126775155	Sppl2a	protein_coding	MGI:1913802	ncRNA_host	2	3039.79	-0.25761	0.0824384	-3.12488	0.00177877	0.0224765	23.1084	22.1346	19.5734	19.2583	17.169	17.6856
ENSMUSG00000027377.3	chr2:127546306-127571852	Mall	protein_coding	MGI:2385152	NA	2	78.8326	1.00108	0.320896	3.11964	0.00181073	0.0228559	0.427562	0.715634	0.739304	1.12256	0.947719	1.78144
ENSMUSG00000042249.12	chr5:113058348-113163657	Grk3	protein_coding	MGI:87941	NA	2	256.083	-0.640122	0.205301	-3.11797	0.00182101	0.022961	1.96684	1.06614	1.26726	0.816258	0.906124	0.974654
ENSMUSG00000008575.18	chr4:82208410-82623987	Nfib	protein_coding	MGI:103188	overlapping_locus	2	3593.8	-0.199185	0.0638974	-3.11726	0.00182543	0.0229922	16.6654	14.9166	12.0877	13.2689	13.5831	10.9977
ENSMUSG00000029171.13	chr5:64250293-64285694	Pgm2	protein_coding	MGI:97564	NA	2	57.0723	1.05991	0.340071	3.11674	0.00182865	0.0230083	0.27686	0.569252	0.704273	1.29621	0.802501	1.04937
ENSMUSG00000052253.7	chr15:25984452-25998567	Zfp622	protein_coding	MGI:1289282	NA	2	779.47	-0.310102	0.099547	-3.11513	0.00183865	0.0231094	11.1337	11.7711	10.0015	9.10815	8.47668	8.95122
ENSMUSG00000040151.10	chr3:144135467-144275942	Hs2st1	protein_coding	MGI:1346049	NA	2	567.995	-0.43902	0.140979	-3.11409	0.00184513	0.0231662	4.45144	3.74173	3.22524	2.74336	2.92481	2.67773
ENSMUSG00000024381.17	chr18:32510283-32568790	Bin1	protein_coding	MGI:108092	NA	2	17002.7	-0.285948	0.0919721	-3.10908	0.00187673	0.0235379	317.382	237.484	250.699	203.723	195.306	262.986
ENSMUSG00000061981.15	chr11:77928757-77951260	Flot2	protein_coding	MGI:103309	NA	2	1753.42	-0.288184	0.0927148	-3.10829	0.00188176	0.023576	26.7729	24.7516	22.9583	21.1289	21.9938	17.9415
ENSMUSG00000022634.10	chr15:93182159-93234816	Yaf2	protein_coding	MGI:1914307	NA	2	465.876	-0.39737	0.127855	-3.10797	0.00188379	0.0235763	13.7377	10.6839	7.62108	8.2629	7.85595	7.54879
ENSMUSG00000031782.16	chr8:95564949-95581523	Coq9	protein_coding	MGI:1915164	NA	2	9224.33	0.225472	0.0726077	3.10535	0.00190057	0.0237611	131.365	140.204	116.812	155.476	169.967	129.759
ENSMUSG00000001508.16	chr11:94853617-94867153	Sgca	protein_coding	MGI:894698	NA	2	3744.93	-0.264018	0.0850304	-3.10499	0.00190289	0.0237649	86.1325	73.6398	88.0779	64.6119	67.3961	74.328
ENSMUSG00000042228.15	chr4:3678115-3813122	Lyn	protein_coding	MGI:96892	NA	2	129.27	0.713711	0.229978	3.10339	0.00191315	0.0238679	0.681286	1.05737	1.05442	1.97025	1.41947	1.24359
ENSMUSG00000022982.11	chr16:90017642-90023217	Sod1	protein_coding	MGI:98351	NA	2	1982.84	-0.236054	0.0760863	-3.10245	0.00191923	0.0239184	131.365	120.19	114.14	95.6186	105.228	109.173
ENSMUSG00000056050.16	chr1:183107682-183150894	Mia3	protein_coding	MGI:2443183	NA	2	4179.46	-0.235654	0.0759837	-3.10137	0.00192627	0.0239809	30.3593	21.3622	22.313	18.673	20.6536	22.9967
ENSMUSG00000003360.16	chr15:98543015-98560770	Ddx23	protein_coding	MGI:1921601	NA	2	2854.7	-0.387401	0.125036	-3.0983	0.00194633	0.0242051	38.9476	42.4117	27.8281	26.058	28.6132	28.0074
ENSMUSG00000024811.12	chr19:36811632-36870877	Tnks2	protein_coding	MGI:1921743	NA	2	5604.47	-0.293782	0.0948766	-3.09647	0.00195841	0.0243296	36.9243	36.0152	26.3235	27.674	28.6624	23.9835
ENSMUSG00000086784.3	chr7:4880152-4899972	Isoc2a	protein_coding	MGI:3609243	NA	2	845.125	0.454058	0.146695	3.09525	0.00196645	0.0244038	10.005	9.49908	17.2521	15.7459	16.1897	17.0605
ENSMUSG00000091537.3	chr9:108903636-108911655	Tma7	protein_coding	MGI:1913417	NA	2	1650.87	-0.268292	0.0866935	-3.09472	0.00196998	0.0244086	49.7023	51.6713	50.2374	40.3983	44.4643	41.0679
ENSMUSG00000047714.15	chr16:31070355-31094095	Ppp1r2	protein_coding	MGI:1914099	NA	2	3461.41	-0.255801	0.0826611	-3.09457	0.00197097	0.0244086	30.9873	34.5566	25.4411	27.867	27.386	21.0173
ENSMUSG00000018417.15	chr1:51788924-51955230	Myo1b	protein_coding	MGI:107752	overlapping_locus	1	460.495	0.589315	0.19053	3.09303	0.00198127	0.0244798	2.0194	2.18532	2.35819	4.07372	3.01744	2.84006
ENSMUSG00000025092.8	chr19:58784182-58932086	Hspa12a	protein_coding	MGI:1920692	ncRNA_host	2	139.982	0.737645	0.238503	3.09281	0.0019827	0.0244798	0.305069	0.389302	0.709926	0.742706	0.5732	0.905666
ENSMUSG00000020458.17	chr11:29642947-29694331	Rtn4	protein_coding	MGI:1915835	NA	2	18565.2	-0.364828	0.117963	-3.09272	0.00198329	0.0244798	109.327	109.361	98.4002	76.9253	84.6401	84.6803
ENSMUSG00000019179.11	chr5:135807334-135819252	Mdh2	protein_coding	MGI:97050	NA	2	23923.7	0.203901	0.0659349	3.09246	0.00198502	0.0244798	539.058	568.404	506.925	655.196	708.605	510.839
ENSMUSG00000057176.5	chr7:127181555-127187767	Ccdc189	protein_coding	MGI:2685012	NA	2	43.2692	1.07923	0.349244	3.09019	0.0020003	0.0246323	0.298417	0.445997	0.572613	0.920247	0.831809	0.931254
ENSMUSG00000032902.2	chr3:104545984-104565778	Slc16a1	protein_coding	MGI:106013	NA	2	1768.09	0.602479	0.194984	3.08988	0.00200235	0.0246323	10.1794	13.6324	9.1657	16.5215	17.1226	16.5483
ENSMUSG00000027367.17	chr2:127112138-127140852	Stard7	protein_coding	MGI:2139090	NA	2	5035.41	0.322467	0.104369	3.08969	0.00200364	0.0246323	32.9207	39.4125	36.6852	46.9834	44.5164	44.8487
ENSMUSG00000020993.10	chr12:59089878-59108258	Trappc6b	protein_coding	MGI:1925482	NA	2	965.41	-0.280807	0.0909307	-3.08814	0.00201413	0.0247354	24.2256	24.679	22.7455	19.3642	19.2973	20.3553
ENSMUSG00000059741.14	chr9:110570929-110598866	Myl3	protein_coding	MGI:97268	NA	2	6787.88	2.06589	0.66914	3.08739	0.00201925	0.0247725	2.71511	28.3374	277.475	110.464	86.0772	219.743
ENSMUSG00000042328.14	chr5:112490949-112526280	Hps4	protein_coding	MGI:2177742	NA	2	149.762	0.559875	0.181417	3.08612	0.00202786	0.0248477	1.28205	1.14444	1.37627	1.84824	1.65055	2.0995
ENSMUSG00000022365.7	chr15:57732898-57755844	Derl1	protein_coding	MGI:1915069	NA	2	1693.53	-0.244881	0.0793557	-3.08587	0.00202959	0.0248477	20.1476	20.2347	20.5916	16.3255	17.787	17.274
ENSMUSG00000022799.5	chr16:38418702-38533636	Arhgap31	protein_coding	MGI:1333857	overlapping_locus	2	982.155	0.443819	0.143856	3.08516	0.00203445	0.0248814	3.68066	3.17907	3.78644	5.17698	3.98621	5.34556
ENSMUSG00000022770.18	chr16:31482261-31693947	Dlg1	protein_coding	MGI:107231	NA	2	2068.85	-0.243469	0.0789617	-3.08338	0.00204665	0.0250048	11.112	11.5169	9.48948	9.71828	8.89693	8.47635
ENSMUSG00000005034.16	chr3:146435329-146518715	Prkacb	protein_coding	MGI:97594	NA	2	1277.73	-0.281105	0.0911794	-3.08299	0.00204935	0.0250118	11.1845	9.61136	8.51571	8.26168	8.06906	7.64003
ENSMUSG00000025731.17	chr17:26094048-26096143	Mettl26	protein_coding	MGI:1915597	NA	1	421.301	-0.373321	0.121139	-3.08176	0.00205784	0.0250775	10.9377	12.5446	10.8022	9.2988	9.42775	7.76327
ENSMUSG00000078862.11	chr2:177577786-177599090	Gm14326	protein_coding	MGI:3709298	NA	2	346.385	-0.608072	0.197324	-3.08159	0.00205898	0.0250775	5.70959	4.26966	5.03974	4.0757	3.02908	2.77858
ENSMUSG00000030652.12	chr7:118108882-118132579	Coq7	protein_coding	MGI:107207	NA	1	1069.29	0.343923	0.11168	3.07953	0.00207329	0.0251847	23.8799	22.3037	23.2805	31.0323	27.4161	29.7715
ENSMUSG00000018405.8	chr11:84703887-84710341	Mrm1	protein_coding	MGI:2443470	NA	2	285.851	0.517041	0.167905	3.07937	0.00207437	0.0251847	3.6066	2.91971	2.99396	4.40648	4.66454	4.50444
ENSMUSG00000024953.18	chr19:6884074-6887474	Prdx5	protein_coding	MGI:1859821	NA	2	3556.99	0.254796	0.0827436	3.07935	0.00207455	0.0251847	79.6359	85.3503	79.8788	97.4764	110.65	85.2991
ENSMUSG00000037470.15	chr1:36179108-36283386	Uggt1	protein_coding	MGI:2443162	ncRNA_host	2	1855.81	-0.535059	0.173772	-3.07909	0.00207632	0.0251847	13.2596	8.49041	6.57064	8.53487	6.57917	4.41022
ENSMUSG00000021814.18	chr14:20505328-20530201	Anxa7	protein_coding	MGI:88031	NA	2	1214.2	-0.408872	0.132916	-3.07617	0.0020968	0.025407	19.5831	10.2101	16.3836	9.35762	7.15777	20.7532
ENSMUSG00000043019.13	chr1:151631122-151697802	Edem3	protein_coding	MGI:1914217	NA	2	1239.25	-0.267659	0.0870327	-3.07538	0.00210236	0.0254482	9.0373	7.17192	6.80784	6.14689	5.91789	6.95901
ENSMUSG00000064179.14	chr7:4507569-4519381	Tnnt1	protein_coding	MGI:1333868	NA	2	6721.03	1.94235	0.631752	3.07454	0.00210829	0.0254836	0.189977	1.31044	234.393	2.88516	6.20601	207.659
ENSMUSG00000018217.13	chr11:63019808-63050373	Pmp22	protein_coding	MGI:97631	NA	2	743.448	0.809505	0.263309	3.07435	0.0021096	0.0254836	3.40778	4.23192	10.277	7.06152	4.70187	23.9329
ENSMUSG00000028834.14	chr4:134042431-134056940	Trim63	protein_coding	MGI:2447992	NA	2	7720.29	-0.737689	0.239992	-3.07381	0.00211343	0.0255038	117.921	145.84	114.154	96.2983	98.2815	41.1576
ENSMUSG00000037916.15	chr19:4057384-4062806	Ndufv1	protein_coding	MGI:107851	NA	2	10853.1	0.219043	0.071271	3.07338	0.00211646	0.0255143	193.242	224.656	179.228	237.799	273.766	187.495
ENSMUSG00000079278.3	chr5:116176814-116221305	Tmem233	protein_coding	MGI:3651514	NA	2	4004.95	-0.545834	0.177671	-3.07217	0.00212509	0.0255922	84.1144	56.2419	72.4746	41.9834	48.6924	53.9385
ENSMUSG00000037523.14	chr2:131075983-131089945	Mavs	protein_coding	MGI:2444773	NA	1	1319.71	0.416426	0.135608	3.07081	0.00213481	0.0256621	10.377	11.7566	15.2775	16.5852	17.9691	14.7151
ENSMUSG00000025130.12	chr11:120451124-120464079	P4hb	protein_coding	MGI:97464	NA	1	4215.18	-0.354131	0.115324	-3.07075	0.00213524	0.0256621	47.0312	56.3198	63.7697	40.2274	41.5265	48.6157
ENSMUSG00000031239.6	chrX:106440705-106446982	Itm2a	protein_coding	MGI:107706	NA	2	2591.54	-0.550477	0.179359	-3.06913	0.00214683	0.0257751	56.2092	61.636	70.368	49.8405	55.4754	28.3305
ENSMUSG00000030747.6	chr7:98802865-98831926	Dgat2	protein_coding	MGI:1915050	NA	2	1188.51	1.67348	0.545466	3.06798	0.00215514	0.0258485	2.73591	5.40088	20.4802	21.1215	18.3034	23.2366
ENSMUSG00000018604.19	chr5:119808734-119822789	Tbx3	protein_coding	MGI:98495	NA	2	358.397	0.873284	0.28476	3.06674	0.00216407	0.0259293	0.710867	1.41638	1.19422	2.12822	1.34379	2.6566
ENSMUSG00000023990.19	chr17:48047955-48103344	Tfeb	protein_coding	MGI:103270	NA	1	2137.57	-0.270871	0.0883566	-3.06566	0.00217194	0.0259745	17.2747	16.5916	13.7711	13.9419	12.7308	12.6792
ENSMUSG00000022024.11	chr14:79825131-79872636	Sugt1	protein_coding	MGI:1915205	NA	2	2266.37	-0.317806	0.103668	-3.06561	0.00217225	0.0259745	11.6096	11.2919	12.0379	9.89963	9.20709	8.96945
ENSMUSG00000020484.20	chr11:5470659-5475893	Xbp1	protein_coding	MGI:98970	NA	2	1800.34	-0.520382	0.169906	-3.06277	0.00219301	0.026185	18.9689	40.4928	29.966	21.3774	22.1979	16.9644
ENSMUSG00000031103.13	chrX:47499923-47552009	Elf4	protein_coding	MGI:1928377	NA	2	142.115	0.851076	0.277908	3.06244	0.00219542	0.026185	0.28722	0.431623	0.492498	0.872401	0.49561	0.793542
ENSMUSG00000038400.16	chr2:173066251-173118326	Pmepa1	protein_coding	MGI:1929600	NA	2	560.98	-0.536482	0.17519	-3.06229	0.0021965	0.026185	5.18405	4.35767	4.54286	2.59634	2.20569	5.87823
ENSMUSG00000032468.12	chr9:99360425-99450952	Armc8	protein_coding	MGI:1921375	NA	2	1212.48	-0.278257	0.0908999	-3.06113	0.00220502	0.02626	8.34496	7.77261	6.90173	6.72033	7.134	5.19872
ENSMUSG00000066113.17	chr4:85432409-86346622	Adamtsl1	protein_coding	MGI:1924989	ncRNA_host	2	115.919	-1.14994	0.375698	-3.06081	0.00220736	0.0262614	0.682909	0.609859	0.543673	0.257303	0.231648	0.372545
ENSMUSG00000028458.13	chr4:43441939-43448064	Tesk1	protein_coding	MGI:1201675	NA	2	1759.33	-0.282655	0.0923917	-3.05931	0.00221847	0.0263669	18.3556	16.389	16.8848	11.7943	14.4103	16.3442
ENSMUSG00000016128.15	chr5:150960975-151157301	Stard13	protein_coding	MGI:2385331	overlapping_locus	2	271.616	0.704305	0.230353	3.0575	0.00223188	0.0264799	0.684804	0.756324	1.28167	1.56728	1.15578	1.57339
ENSMUSG00000031097.16	chr7:141995545-141998147	Tnni2	protein_coding	MGI:105070	NA	2	136847	-0.294352	0.0962745	-3.05743	0.00223246	0.0264799	6344.93	5169.72	5373.5	4243.75	4828.68	4660.26
ENSMUSG00000024871.12	chr19:4053313-4057005	Doc2g	protein_coding	MGI:1926250	overlapping_locus	2	49.5742	1.60595	0.525552	3.05574	0.00224507	0.0266027	0.287751	0.771897	0.822346	1.14163	3.02017	1.41785
ENSMUSG00000002603.16	chr7:25386427-25404502	Tgfb1	protein_coding	MGI:98725	NA	2	217.703	0.803966	0.263161	3.05504	0.0022503	0.026638	1.43927	2.01242	2.60848	4.64041	2.84122	2.83911
ENSMUSG00000054034.11	chrX:135101697-135104625	Tceal5	protein_coding	MGI:3036236	NA	2	469.503	-0.626365	0.205268	-3.05146	0.00227735	0.0269311	16.2582	19.736	17.2219	9.40098	10.4955	15.0821
ENSMUSG00000036620.15	chr11:50101717-50125930	Mgat4b	protein_coding	MGI:2143974	ncRNA_host	2	1012.52	-0.348242	0.114151	-3.05073	0.00228286	0.0269693	16.8829	14.794	15.5806	14.1787	11.6737	11.4383
ENSMUSG00000040359.15	chr4:25248605-25281821	Ufl1	protein_coding	MGI:1914740	NA	2	940.38	-0.281654	0.0923658	-3.04933	0.00229353	0.0270431	9.14127	9.80708	8.6906	7.53213	7.39167	7.81902
ENSMUSG00000018765.6	chr11:69523816-69544123	Fxr2	protein_coding	MGI:1346074	NA	2	4120.21	-0.273316	0.0896322	-3.04931	0.0022937	0.0270431	38.7301	47.2445	39.7572	35.2352	35.3023	33.4014
ENSMUSG00000022216.18	chr14:55815580-55818986	Psme1	protein_coding	MGI:1096367	NA	2	801.765	0.355964	0.116798	3.0477	0.002306	0.0271611	21.2281	20.9285	23.4646	28.6897	29.7303	25.7746
ENSMUSG00000068566.14	chr7:3337605-3348958	Myadm	protein_coding	MGI:1355332	overlapping_locus	2	1282.59	0.78076	0.256228	3.04713	0.00231034	0.0271851	4.64085	6.66272	7.06369	13.2089	6.67496	11.4682
ENSMUSG00000027506.16	chr3:8990653-9069783	Tpd52	protein_coding	MGI:107749	NA	2	713.068	-0.456634	0.149888	-3.0465	0.00231524	0.0272156	3.91516	3.49782	4.11846	2.87098	3.24187	2.39066
ENSMUSG00000025141.4	chr11:120536857-120538984	Myadml2	protein_coding	MGI:1915765	NA	1	2348.76	-0.288245	0.0946359	-3.04583	0.00232038	0.0272488	52.2305	48.1424	39.6953	36.5562	43.6413	34.0096
ENSMUSG00000019254.17	chr7:4484519-4504679	Ppp1r12c	protein_coding	MGI:1924258	NA	2	601.107	0.355781	0.116964	3.04179	0.00235174	0.0275676	4.95124	6.136	6.79399	7.75	7.2601	7.77379
ENSMUSG00000038733.15	chr1:181000793-181039566	Wdr26	protein_coding	MGI:1923825	NA	2	4254.78	-0.249898	0.082162	-3.04153	0.00235379	0.0275676	21.7234	23.5004	21.0821	18.9805	17.0878	19.795
ENSMUSG00000041355.14	chr3:88483183-88495726	Ssr2	protein_coding	MGI:1913506	NA	2	575.1	-0.349178	0.114807	-3.04144	0.00235453	0.0275676	13.4251	12.0657	12.1001	9.15944	10.1712	10.1025
ENSMUSG00000101249.2	chr1:24654787-24655278	Gm29216	unprocessed_pseudogene	MGI:5579922	NA	2	1846.49	0.438504	0.144237	3.04016	0.00236453	0.0276573	145.512	152.08	64.6822	177.253	181.4	112.045
ENSMUSG00000029017.14	chr5:21942139-21962150	Pmpcb	protein_coding	MGI:1920328	NA	1	1978.5	0.230929	0.0759709	3.0397	0.00236813	0.027672	31.8505	33.7435	33.8158	42.1331	40.6162	34.4469
ENSMUSG00000006390.16	chr4:118285290-118290150	Elovl1	protein_coding	MGI:1858959	NA	2	144.787	0.574601	0.189088	3.0388	0.00237522	0.0277064	1.35107	1.21282	1.82479	2.14778	1.6432	2.80423
ENSMUSG00000027423.16	chr2:144092043-144112826	Snx5	protein_coding	MGI:1916428	ncRNA_host	2	1642.88	-0.238438	0.0784674	-3.03869	0.00237611	0.0277064	15.5452	15.5907	14.5718	12.7328	12.825	13.1901
ENSMUSG00000027435.9	chr2:148278560-148285483	Cd93	protein_coding	MGI:106664	NA	2	1140.11	0.652342	0.214697	3.03843	0.00237812	0.0277064	4.62436	5.95488	4.27566	10.8413	7.16499	5.60802
ENSMUSG00000040521.12	chr10:126847441-126866709	Tsfm	protein_coding	MGI:1913649	NA	2	428.69	0.375718	0.123673	3.03799	0.00238165	0.0277202	5.76055	6.02222	6.15092	8.13378	8.75718	6.53721
ENSMUSG00000027765.7	chr3:60910216-60916403	P2ry1	protein_coding	MGI:105049	NA	2	418.431	0.733945	0.24174	3.0361	0.00239661	0.0278668	2.35154	3.16304	3.23296	5.30512	5.48653	3.75124
ENSMUSG00000027940.19	chr3:89979956-90008209	Tpm3	protein_coding	MGI:1890149	NA	1	9108.81	0.69728	0.229936	3.0325	0.00242538	0.0281736	3.80667	6.11802	152.332	10.0966	10.5544	135.142
ENSMUSG00000021235.14	chr12:84408431-84420570	Coq6	protein_coding	MGI:1924408	NA	2	554.558	0.344936	0.113774	3.03175	0.00243139	0.0282155	8.6441	9.40582	8.54432	11.1249	12.2673	10.3632
ENSMUSG00000048832.10	chr19:10666099-10691991	Vps37c	protein_coding	MGI:2147661	NA	2	841.035	-0.368411	0.121588	-3.02999	0.00244558	0.0283204	13.065	15.6041	10.3065	11.5856	10.0535	8.42581
ENSMUSG00000028033.17	chr1:21468627-22032166	Kcnq5	protein_coding	MGI:1924937	overlapping_locus	2	876.487	-0.756098	0.249559	-3.02974	0.00244766	0.0283204	4.87753	6.631	5.02875	3.67624	3.65586	2.59263
ENSMUSG00000010914.11	chr2:102851420-102903858	Pdhx	protein_coding	MGI:1351627	NA	2	2533.97	0.289806	0.0956577	3.02961	0.0024487	0.0283204	22.6201	23.0793	19.7094	27.1077	30.5158	22.6377
ENSMUSG00000070385.13	chr3:102981330-103007036	Ampd1	protein_coding	MGI:88015	ncRNA_host	2	24020.4	-0.586683	0.19366	-3.02945	0.00245002	0.0283204	376.091	323.552	359.857	236.887	290.137	184.812
ENSMUSG00000020817.17	chr11:70735604-70833931	Rabep1	protein_coding	MGI:1860236	overlapping_locus	1	1723.12	-0.326303	0.107737	-3.02869	0.00245617	0.0283637	12.1668	9.97307	10.2058	8.89272	8.73465	8.11496
ENSMUSG00000036206.13	chr1:88998137-89082790	Sh3bp4	protein_coding	MGI:2138297	overlapping_locus	2	137.376	0.575915	0.190245	3.02723	0.00246804	0.0284729	0.700727	0.638232	0.725275	1.12128	0.850772	1.11849
ENSMUSG00000038244.15	chr7:111825063-112012313	Mical2	protein_coding	MGI:2444947	NA	2	4472.88	-0.854117	0.282221	-3.02641	0.00247477	0.0285227	18.7514	11.8586	25.6837	8.48266	11.0195	11.315
ENSMUSG00000038900.18	chr2:32851571-32854508	Rpl12	protein_coding	MGI:98002	ncRNA_host	2	3672.66	-0.275705	0.09113	-3.02541	0.00248297	0.0285893	92.317	108.739	102.075	75.848	90.2805	83.6936
ENSMUSG00000030123.16	chr6:115931772-115971966	Plxnd1	protein_coding	MGI:2154244	NA	2	1569.54	0.49766	0.164564	3.02411	0.0024937	0.0286848	8.49516	7.71534	7.23772	12.7031	9.54312	10.7931
ENSMUSG00000072946.13	chr12:84332006-84362606	Ptgr2	protein_coding	MGI:1916372	NA	2	2156.46	0.413901	0.136994	3.0213	0.00251691	0.0289104	15.4312	18.3171	17.068	23.1803	23.4128	21.0459
ENSMUSG00000031657.17	chr8:88864483-88898655	Heatr3	protein_coding	MGI:2444491	ncRNA_host	2	1143.07	-0.262667	0.0869428	-3.02114	0.00251821	0.0289104	14.6034	15.5488	13.2482	12.6443	12.5127	11.0304
ENSMUSG00000026032.9	chr1:58625543-58635123	Ndufb3	protein_coding	MGI:1913745	NA	2	2783.7	0.362121	0.119889	3.02046	0.00252393	0.0289479	99.8467	129.593	116.015	163.664	154.414	126.619
ENSMUSG00000070643.12	chr1:133310041-133352115	Sox13	protein_coding	MGI:98361	NA	2	278.161	0.617993	0.204721	3.01871	0.00253856	0.0290874	1.90361	2.11864	2.59609	3.48404	2.7109	4.16599
ENSMUSG00000078532.10	chr4:130297197-130339644	Nkain1	protein_coding	MGI:1914399	NA	1	515.117	-0.446495	0.147942	-3.01805	0.00254408	0.0291225	16.1334	14.643	14.1484	12.1163	10.8481	9.91507
ENSMUSG00000027708.15	chr3:35946254-35991594	Dcun1d1	protein_coding	MGI:2150386	NA	1	985.47	-0.3831	0.126951	-3.0177	0.00254698	0.0291273	6.92611	6.1123	6.43453	4.74882	5.74295	4.49149
ENSMUSG00000020154.11	chr10:116111428-116225440	Ptprb	protein_coding	MGI:97809	ncRNA_host	2	2335.52	0.441243	0.146299	3.01604	0.00256098	0.0292591	4.84209	5.61239	5.75485	8.84359	5.94138	7.18481
ENSMUSG00000031596.16	chr8:41315433-41375345	Slc7a2	protein_coding	MGI:99828	NA	2	1816.57	-0.555392	0.184175	-3.01557	0.00256497	0.0292764	4.08147	7.61938	10.5796	3.98	4.11097	6.76937
ENSMUSG00000018199.10	chr1:143626528-143652806	Ro60	protein_coding	MGI:106652	NA	2	202.967	-0.50899	0.168832	-3.01478	0.00257167	0.0293245	1.04508	0.935953	1.19514	0.763755	0.798749	0.665018
ENSMUSG00000021557.16	chr13:59593556-59733041	Agtpbp1	protein_coding	MGI:2159437	NA	1	2031.78	-0.262103	0.0869977	-3.01276	0.0025888	0.0294913	4.19335	4.12255	4.31355	3.68747	3.40064	3.44811
ENSMUSG00000053205.10	chr14:45588550-45660277	Styx	protein_coding	MGI:1891150	NA	2	1039.68	-0.491272	0.163112	-3.01186	0.00259649	0.0295505	3.06409	2.05519	3.47503	1.78488	1.78359	2.50888
ENSMUSG00000074652.4	chr2:155453132-155476227	Myh7b	protein_coding	MGI:3710243	ncRNA_host	2	394.704	1.22457	0.406816	3.01014	0.00261131	0.0296828	0.0567609	0.454456	3.8534	0.730418	0.966874	3.6758
ENSMUSG00000037818.17	chr3:40801405-40892573	Abhd18	protein_coding	MGI:1915468	NA	2	329.984	0.760048	0.252514	3.00992	0.00261315	0.0296828	0.833617	1.66117	3.07436	2.73604	2.83043	2.687
ENSMUSG00000075415.14	chr2:30916218-31032020	Fnbp1	protein_coding	MGI:109606	NA	2	422.347	0.468273	0.155608	3.00932	0.00261833	0.029713	1.05633	1.18839	1.60182	2.05735	1.54491	1.65751
ENSMUSG00000024098.7	chr17:66228967-66258221	Twsg1	protein_coding	MGI:2137520	NA	2	1056.76	-0.362146	0.12039	-3.0081	0.00262886	0.0298038	7.66625	10.6961	7.41689	7.59585	7.08053	5.39718
ENSMUSG00000031781.15	chr8:95546432-95564986	Ciapin1	protein_coding	MGI:1922083	NA	2	830.562	0.646077	0.214829	3.0074	0.00263493	0.029844	3.97882	5.53187	4.18648	5.98524	7.22453	8.48754
ENSMUSG00000001847.15	chr5:143489389-143513791	Rac1	protein_coding	MGI:97845	overlapping_locus	2	3920.37	-0.185115	0.0615643	-3.00686	0.00263959	0.0298673	33.7097	33.8939	31.8382	29.9787	28.5973	28.9457
ENSMUSG00000028789.17	chr4:128824026-128856232	Azin2	protein_coding	MGI:2442093	NA	1	71.2944	-0.909736	0.30261	-3.0063	0.00264446	0.0298673	1.4332	1.39219	0.777696	0.456393	0.72107	0.659257
ENSMUSG00000025007.14	chr19:40538701-40576907	Aldh18a1	protein_coding	MGI:1888908	overlapping_locus	2	76.4013	0.869776	0.289319	3.00629	0.00264458	0.0298673	0.654321	0.420134	0.613842	1.02809	0.553338	1.69778
ENSMUSG00000026418.17	chr1:135707172-135738727	Tnni1	protein_coding	MGI:105073	NA	2	2969.78	1.49455	0.497316	3.00523	0.00265383	0.029942	0.0700727	0.398767	62.626	0.761993	1.42512	52.1533
ENSMUSG00000031378.15	chrX:72760203-72782140	Abcd1	protein_coding	MGI:1349215	NA	2	881.278	0.328988	0.109482	3.00495	0.00265626	0.029942	6.8722	6.12264	7.6947	8.89766	8.40551	8.67298
ENSMUSG00000033705.18	chr2:120459602-120562376	Stard9	protein_coding	MGI:3045258	NA	2	287.337	0.550078	0.183187	3.00283	0.00267482	0.0301012	0.436749	0.347441	0.549254	0.719407	0.566294	0.646885
ENSMUSG00000002718.15	chr2:166747960-166788309	Cse1l	protein_coding	MGI:1339951	overlapping_locus	2	2024.04	-0.241932	0.0805773	-3.00248	0.00267786	0.0301012	23.1447	22.6662	21.1972	19.3752	19.0269	18.2541
ENSMUSG00000017664.17	chr2:165118474-165129789	Slc35c2	protein_coding	MGI:2385166	NA	1	418.208	-0.325047	0.10826	-3.00246	0.00267804	0.0301012	8.6297	7.48096	6.9799	6.17258	6.01542	6.17478
ENSMUSG00000000948.17	chr7:59626488-59630680	Gm38393	protein_coding	MGI:5613898	ncRNA_host	2	56.1341	-1.61475	0.538225	-3.00014	0.00269855	0.0303028	0.816499	0.756555	0.574649	0.24724	0.138392	0.36779
ENSMUSG00000021036.11	chr12:87351832-87435129	Sptlc2	protein_coding	MGI:108074	NA	2	215.141	0.48492	0.161649	2.99984	0.00270122	0.030304	0.797872	0.87441	0.958959	1.28892	1.0431	1.35486
ENSMUSG00000067851.12	chr1:10207796-10302895	Arfgef1	protein_coding	MGI:2442988	overlapping_locus	2	4606.46	-0.236294	0.0787883	-2.9991	0.00270776	0.0303485	24.0638	25.2111	24.3186	20.7974	20.5642	21.2096
ENSMUSG00000073535.6	chr1:155395919-155402889	Gm5532	lncRNA	MGI:3646828	NA	2	121.726	1.96664	0.655892	2.99843	0.00271378	0.0303871	0.137223	0.354957	3.75355	3.26652	2.34928	1.50724
ENSMUSG00000024769.8	chr19:6356486-6375682	Cdc42bpg	protein_coding	MGI:2652845	NA	2	451.041	-0.525447	0.175317	-2.99712	0.0027254	0.0304883	3.64401	3.05493	2.69026	2.08983	2.85841	1.61722
ENSMUSG00000027314.7	chr2:119156265-119166443	Dll4	protein_coding	MGI:1859388	NA	2	262.192	0.748063	0.249631	2.99668	0.00272941	0.0305043	1.97775	2.43936	1.66836	4.33663	3.51564	2.4766
ENSMUSG00000045975.9	chr16:97656409-97723833	C2cd2	protein_coding	MGI:1891883	ncRNA_host	2	4561.2	-0.315903	0.105442	-2.99598	0.00273567	0.0305285	25.0668	26.892	27.5116	18.9135	19.9547	25.3272
ENSMUSG00000026466.17	chr1:155880345-155912226	Tor1aip1	protein_coding	MGI:3582693	NA	2	5048.5	-0.240993	0.0804487	-2.99561	0.00273896	0.0305285	39.9945	39.8915	40.1921	32.7893	36.4154	32.3893
ENSMUSG00000008090.15	chr5:108840248-108854790	Fgfrl1	protein_coding	MGI:2150920	NA	2	703.738	0.499577	0.166772	2.99557	0.00273934	0.0305285	6.4582	4.98912	10.2646	9.4973	7.3128	13.4162
ENSMUSG00000041187.17	chr7:16576827-16604389	Prkd2	protein_coding	MGI:2141917	NA	2	326.174	0.665815	0.222323	2.99481	0.00274613	0.0305754	0.850672	1.88764	1.82331	2.41617	2.18261	2.35775
ENSMUSG00000060675.14	chr19:7534824-7565910	Plaat3	protein_coding	MGI:2179715	NA	2	3871.4	0.450074	0.150429	2.99193	0.00277222	0.0308367	21.9053	15.0515	19.6897	22.4495	22.9361	32.4689
ENSMUSG00000012422.15	chr13:90237242-90292026	Tmem167	protein_coding	MGI:1913324	ncRNA_host	2	538.847	-0.319755	0.106937	-2.99013	0.00278856	0.0309892	2.36225	1.92009	1.84689	1.53815	1.5977	1.74825
ENSMUSG00000058355.9	chr8:80410091-80438369	Abce1	protein_coding	MGI:1195458	NA	2	1760.91	-0.226625	0.0758084	-2.98945	0.0027948	0.0310293	18.9811	18.9812	16.9268	15.7381	17.0277	14.1404
ENSMUSG00000038717.10	chr9:44824515-44832040	Atp5l	protein_coding	MGI:1351597	NA	2	5557.39	0.221407	0.0741116	2.98748	0.00281284	0.0312003	365.316	330.662	322.655	402.279	403.376	381.291
ENSMUSG00000025271.14	chrX:149371225-149426874	Pfkfb1	protein_coding	MGI:107816	NA	2	1173.23	0.320643	0.107356	2.98672	0.00281986	0.0312488	11.0318	13.8551	15.1702	17.1545	16.93	15.6034
ENSMUSG00000020268.15	chr11:54717692-54751742	Lyrm7	protein_coding	MGI:1922780	NA	2	132.604	0.577203	0.193321	2.98572	0.00282914	0.0313223	0.755526	0.950021	0.69402	1.23476	1.28372	1.04056
ENSMUSG00000025917.10	chr1:10094826-10108374	Cops5	protein_coding	MGI:1349415	NA	2	2520.62	-0.279133	0.0934991	-2.98541	0.00283198	0.0313243	60.0289	60.4697	52.2098	44.6628	53.9092	43.6266
ENSMUSG00000031885.15	chr8:105897306-105944621	Cbfb	protein_coding	MGI:99851	ncRNA_host	2	2839.18	-0.509562	0.170724	-2.98472	0.00283842	0.0313441	31.8266	38.7449	45.0793	26.5262	26.5743	28.0361
ENSMUSG00000026490.19	chr1:179788037-179993168	Cdc42bpa	protein_coding	MGI:2441841	NA	1	972.537	-0.257284	0.0862038	-2.98461	0.00283942	0.0313441	3.99193	3.86871	3.13656	3.26604	3.06074	2.84116
ENSMUSG00000055254.16	chr13:58954383-59281784	Ntrk2	protein_coding	MGI:97384	NA	2	92.5898	-1.04733	0.350939	-2.98436	0.00284174	0.0313441	0.141112	0.159526	0.514657	0.0967015	0.0744589	0.216318
ENSMUSG00000022041.11	chr14:66372488-66390397	Chrna2	protein_coding	MGI:87886	NA	2	31.0898	3.53288	1.18424	2.98324	0.00285219	0.03143	0	0.0114872	0.513994	0.291909	0.570782	0.763118
ENSMUSG00000008140.19	chr7:44139361-44145953	Emc10	protein_coding	MGI:1916933	NA	2	1263.45	-0.264622	0.0887138	-2.98287	0.00285555	0.0314377	25.9045	27.3239	24.9243	22.2475	24.563	18.5249
ENSMUSG00000033423.17	chr4:117407562-117531494	Eri3	protein_coding	MGI:2153887	ncRNA_host	2	2032.03	-0.246928	0.0827914	-2.98254	0.0028587	0.0314431	28.5902	27.0241	24.6496	22.9291	23.843	20.8438
ENSMUSG00000060166.7	chr16:18038617-18053000	Zdhhc8	protein_coding	MGI:1338012	NA	2	876.431	-0.278056	0.0932383	-2.9822	0.00286181	0.0314479	8.49854	6.6218	6.60078	5.50055	5.94362	6.35789
ENSMUSG00000020849.14	chr11:75623695-75656671	Ywhae	protein_coding	MGI:894689	NA	2	9468.78	-0.197804	0.0663388	-2.98173	0.00286627	0.0314677	165.037	163.102	167.064	132.459	145.273	154.552
ENSMUSG00000003228.10	chr19:60878187-61084406	Grk5	protein_coding	MGI:109161	NA	2	170.274	0.506584	0.169913	2.98144	0.00286898	0.0314681	0.72416	0.862571	0.795506	1.22986	1.11755	1.04838
ENSMUSG00000069094.13	chr3:19277272-19365486	Pde7a	protein_coding	MGI:1202402	NA	2	2217.04	-0.362442	0.121654	-2.97928	0.0028893	0.0316538	10.1379	10.4154	16.1881	9.21336	8.35833	10.6122
ENSMUSG00000087366.8	chr4:94939771-95055555	Junos	lncRNA	MGI:2652837	ncRNA_host	2	463.821	-0.939137	0.315247	-2.97905	0.00289141	0.0316538	7.59787	6.10738	2.86678	4.35584	3.99783	0.958576
ENSMUSG00000025035.10	chr19:46519535-46561637	Arl3	protein_coding	MGI:1929699	NA	2	1149.43	-0.439035	0.147387	-2.97878	0.00289396	0.0316538	19.7019	20.5918	21.9307	14.3933	17.599	13.8882
ENSMUSG00000025791.19	chr4:99786611-99844491	Pgm1	protein_coding	MGI:97565	NA	2	27790.2	-0.379308	0.127363	-2.97816	0.00289986	0.031689	464.244	340.762	400.6	261.622	321.296	342.245
ENSMUSG00000089718.2	chr9:112056647-112057310	2310075C17Rik	lncRNA	MGI:1917444	NA	2	39.5754	1.19014	0.39979	2.97691	0.00291168	0.0317888	1.08333	2.13506	3.03281	3.89334	5.1127	4.76602
ENSMUSG00000035885.6	chr19:7192518-7194981	Cox8a	protein_coding	MGI:105959	NA	2	515.157	0.363057	0.121971	2.97658	0.00291485	0.0317939	24.2888	26.1433	30.2479	35.1884	32.3957	36.4962
ENSMUSG00000019302.17	chr11:100900278-100954545	Atp6v0a1	protein_coding	MGI:103286	ncRNA_host	2	2327.72	-0.29339	0.0986727	-2.97337	0.00294552	0.0320988	13.6289	12.7533	16.0045	11.3723	12.4772	10.7026
ENSMUSG00000002661.15	chr17:57304339-57306322	Alkbh7	protein_coding	MGI:1913650	NA	2	385.138	0.373783	0.125738	2.97272	0.0029517	0.0321232	13.695	13.7449	12.6807	17.7375	19.0019	15.2842
ENSMUSG00000028466.16	chr4:43562332-43567060	Creb3	protein_coding	MGI:99946	NA	2	663.16	-0.331563	0.111551	-2.9723	0.00295578	0.0321232	12.3542	14.1392	12.9718	10.2858	10.552	10.4493
ENSMUSG00000024132.7	chr17:24645615-24658322	Eci1	protein_coding	MGI:94871	NA	2	2799.35	0.526329	0.177101	2.97191	0.00295952	0.0321232	47.512	57.7243	66.0536	76.8516	98.785	70.3206
ENSMUSG00000027099.10	chr2:74656147-74708775	Mtx2	protein_coding	MGI:1859652	overlapping_locus	2	784.61	0.362026	0.121818	2.97185	0.00296008	0.0321232	8.68806	9.15752	7.64563	12.4494	12.7036	8.16364
ENSMUSG00000037149.11	chr12:13266974-13299214	Ddx1	protein_coding	MGI:2144727	NA	2	3673.29	-0.233761	0.0786619	-2.97172	0.00296136	0.0321232	28.946	31.6157	27.9232	24.4118	27.14	23.662
ENSMUSG00000030304.12	chr6:148080577-148113872	Ergic2	protein_coding	MGI:1914706	NA	2	1301.89	-0.250401	0.0844755	-2.96419	0.00303483	0.0328899	9.72586	10.0121	8.2384	7.69592	8.30236	7.43398
ENSMUSG00000031229.17	chrX:104841221-104973009	Atrx	protein_coding	MGI:103067	overlapping_locus	1	1379.05	-0.431942	0.145803	-2.96251	0.0030514	0.0330391	3.75137	3.58931	3.68206	2.58949	2.4481	3.18247
ENSMUSG00000028657.15	chr4:122730035-122752968	Ppt1	protein_coding	MGI:1298204	NA	2	426.736	0.352443	0.118993	2.96188	0.00305769	0.0330535	3.72144	3.27981	3.89363	4.32386	4.43025	5.15089
ENSMUSG00000020873.16	chr11:95275518-95282602	Slc35b1	protein_coding	MGI:1343133	NA	2	850.547	-0.354893	0.119823	-2.96181	0.00305833	0.0330535	23.0564	23.3076	20.1853	15.9954	18.707	17.0981
ENSMUSG00000033307.8	chr10:75695187-75696074	Mif	protein_coding	MGI:96982	NA	2	801.545	0.378768	0.127947	2.96035	0.00307292	0.0331808	45.5369	40.6231	52.9902	57.576	58.8357	64.1482
ENSMUSG00000028988.14	chr4:149602693-149650894	Ctnnbip1	protein_coding	MGI:1915756	ncRNA_host	2	519.658	-0.413926	0.139842	-2.95996	0.00307676	0.0331918	7.31848	7.52558	8.08937	5.9244	6.79986	4.73018
ENSMUSG00000055805.16	chr11:103061933-103089727	Fmnl1	protein_coding	MGI:1888994	NA	2	196.603	0.637086	0.215339	2.95853	0.00309112	0.0333163	1.14994	1.24181	1.75713	2.58215	1.83838	1.99416
ENSMUSG00000118669.2	chr16:18166046-18225826	Arvcf	protein_coding	MGI:109620	ncRNA_host	2	408.447	-0.353272	0.119433	-2.9579	0.00309747	0.0333318	2.97105	3.13635	2.77736	2.38101	2.35059	2.21187
ENSMUSG00000023008.19	chr15:99215106-99268363	Fmnl3	protein_coding	MGI:109569	ncRNA_host	2	427.162	0.429617	0.145248	2.95782	0.0030982	0.0333318	2.4545	3.10461	3.47638	4.72081	3.71163	3.71615
ENSMUSG00000058076.13	chr1:170954734-170978172	Sdhc	protein_coding	MGI:1913302	NA	2	9968.22	0.206804	0.069935	2.95709	0.00310555	0.0333613	100.718	115.501	95.8084	128.057	133.083	100.528
ENSMUSG00000026342.11	chr1:125488332-125523557	Slc35f5	protein_coding	MGI:1921400	NA	2	635.936	-0.538366	0.182066	-2.95699	0.0031066	0.0333613	11.7768	11.42	6.18771	6.49601	5.55921	7.72657
ENSMUSG00000032336.18	chr9:58489523-58565238	Nptn	protein_coding	MGI:108077	NA	2	1755.56	-0.277041	0.0937802	-2.95415	0.00313533	0.0336392	11.5	10.5457	13.2272	9.46499	9.51206	10.1005
ENSMUSG00000002129.12	chr11:4110350-4132541	Sf3a1	protein_coding	MGI:1914715	NA	2	629.188	0.301256	0.102031	2.9526	0.0031511	0.0337777	4.16334	3.88157	4.37076	4.85157	4.94919	5.47593
ENSMUSG00000050164.12	chr15:81119700-81123165	Mchr1	protein_coding	MGI:2180756	NA	2	84.3222	1.68893	0.572243	2.95142	0.0031632	0.0338766	1.93604	0.178857	0.536353	0.729453	2.18907	4.62781
ENSMUSG00000032757.7	chr6:4076899-4086972	Bet1	protein_coding	MGI:1343104	NA	2	305.013	-0.441505	0.149632	-2.9506	0.00317162	0.0339361	7.00304	9.16244	7.92463	5.55954	7.38692	4.80089
ENSMUSG00000041921.17	chr2:71283620-71355538	Metap1d	protein_coding	MGI:1913809	ncRNA_host	2	441.831	0.505616	0.171414	2.94967	0.00318114	0.034007	2.62437	4.00789	2.20642	5.12576	5.16034	2.60267
ENSMUSG00000024972.17	chr19:7574025-7584558	Lgals12	protein_coding	MGI:1929094	NA	2	21.4095	-2.95584	1.00235	-2.94893	0.00318881	0.0340582	0.0727765	0.047063	1.13648	0	0.00939156	0.526686
ENSMUSG00000070047.15	chr8:45388484-45505294	Fat1	protein_coding	MGI:109168	NA	2	141.675	0.737246	0.250155	2.94715	0.00320718	0.0342234	0.120828	0.225728	0.367916	0.348636	0.252944	0.545747
ENSMUSG00000020089.9	chr10:61484331-61509947	Ppa1	protein_coding	MGI:97831	NA	1	1044.68	0.290478	0.0985847	2.94648	0.00321414	0.0342667	25.1291	22.3923	21.192	29.3687	29.6654	25.2181
ENSMUSG00000040624.19	chr10:3690364-3917303	Plekhg1	protein_coding	MGI:2676551	NA	1	121.06	0.619632	0.210443	2.94442	0.00323558	0.0344642	0.412751	0.522712	0.406796	0.983928	0.788974	0.401192
ENSMUSG00000020149.18	chr11:20151432-20176856	Rab1a	protein_coding	MGI:97842	NA	2	2648.87	-0.176902	0.0601065	-2.94315	0.00324893	0.034536	27.3046	29.5547	25.0085	25.3697	25.2408	21.8233
ENSMUSG00000042476.13	chr5:8943717-9009226	Abcb4	protein_coding	MGI:97569	overlapping_locus	2	6639.27	-0.343107	0.11658	-2.94312	0.00324927	0.034536	62.4733	84.6627	47.7881	55.5127	59.7972	37.9112
ENSMUSG00000041115.17	chrX:150927264-151008232	Iqsec2	protein_coding	MGI:3528396	NA	1	606.131	0.51375	0.17457	2.94294	0.0032511	0.034536	2.32023	2.91675	2.54964	4.99175	3.77583	2.62664
ENSMUSG00000023074.12	chrX:52433475-52459379	Mospd1	protein_coding	MGI:1917630	NA	2	1837.53	-0.482715	0.164054	-2.94242	0.00325661	0.0345634	42.5397	30.9416	39.6249	27.7273	28.7408	24.5168
ENSMUSG00000055296.15	chr4:56866923-56947437	Tmem245	protein_coding	MGI:2445107	ncRNA_host	2	1704.38	-0.244608	0.0831585	-2.94147	0.00326662	0.0346156	4.18911	3.97092	3.81644	3.11684	3.36774	3.62566
ENSMUSG00000029405.17	chr5:92200005-92231578	G3bp2	protein_coding	MGI:2442040	ncRNA_host	2	2403.32	-0.231053	0.0785522	-2.94139	0.00326739	0.0346156	17.1614	16.8702	18.6888	14.9791	15.9531	13.9631
ENSMUSG00000042042.15	chr6:118084413-118116101	Csgalnact2	protein_coding	MGI:1926002	ncRNA_host	2	956.908	-0.347935	0.118323	-2.94056	0.00327616	0.0346773	11.0808	9.92763	9.71064	7.61984	8.79268	7.66654
ENSMUSG00000041571.11	chr7:15651133-15656327	Selenow	protein_coding	MGI:1100878	NA	2	18623.2	-0.353187	0.120257	-2.93694	0.00331465	0.0350534	934.533	1047.47	1008.22	749.044	825.939	764.196
ENSMUSG00000026407.18	chr1:135980488-136047560	Cacna1s	protein_coding	MGI:88294	overlapping_locus	2	40192.4	-0.344747	0.117465	-2.93488	0.00333675	0.0352554	196.212	233.585	269.012	179.028	192.72	174.333
ENSMUSG00000034520.15	chr11:102690405-102710526	Gjc1	protein_coding	MGI:95718	NA	2	113.179	0.600198	0.204555	2.93416	0.00334452	0.0353059	0.751652	0.995865	1.16761	1.57702	1.41002	1.43403
ENSMUSG00000039968.10	chr5:21098026-21161396	Rsbn1l	protein_coding	MGI:3036237	overlapping_locus	2	451.633	-0.371665	0.126687	-2.93372	0.00334922	0.035324	2.13621	1.98778	1.47395	1.42373	1.46692	1.38717
ENSMUSG00000036473.17	chr17:24394405-24424536	Tbc1d24	protein_coding	MGI:2443456	overlapping_locus	2	399.776	0.337054	0.114926	2.9328	0.00335921	0.0353976	1.59782	1.5353	1.33596	2.13877	2.02694	1.52885
ENSMUSG00000062070.13	chrX:105230706-105247305	Pgk1	protein_coding	MGI:97555	NA	2	17406.2	-0.241418	0.0823624	-2.93117	0.00337689	0.0355522	378.081	350.231	352.057	301.485	306.048	306.196
ENSMUSG00000014313.16	chr15:35926032-35938392	Cox6c	protein_coding	MGI:104614	NA	2	6778.23	0.189432	0.0646346	2.93082	0.0033807	0.0355606	115.21	139.461	111.873	148.271	155.422	115.841
ENSMUSG00000022847.16	chr16:20543204-20553261	Thpo	protein_coding	MGI:101875	NA	2	153.025	0.809221	0.276265	2.92915	0.0033989	0.0357202	2.18857	1.85396	1.05811	3.42749	2.52698	2.62501
ENSMUSG00000062203.16	chr16:11037156-11072134	Gspt1	protein_coding	MGI:1316728	NA	2	1869.53	-0.321148	0.109667	-2.9284	0.00340715	0.0357452	19.5081	20.4467	19.4569	15.0605	15.1957	17.4549
ENSMUSG00000053838.15	chr11:6055691-6150415	Nudcd3	protein_coding	MGI:2144158	overlapping_locus	2	3464.63	-0.179932	0.0614441	-2.92838	0.00340734	0.0357452	35.2776	33.9061	30.4799	29.0886	30.7725	27.9461
ENSMUSG00000027882.19	chr3:108700492-108747842	Stxbp3	protein_coding	MGI:107362	overlapping_locus	2	863.834	-0.358084	0.12232	-2.92743	0.00341781	0.0358232	8.93602	7.66043	9.28404	6.84303	7.09228	6.33897
ENSMUSG00000022307.17	chr15:41310878-41724444	Oxr1	protein_coding	MGI:2179326	NA	2	1819.62	-0.262232	0.0896172	-2.92614	0.00343196	0.0359396	12.1214	11.7627	9.2632	10.4063	9.78539	7.50633
ENSMUSG00000095597.3	chrX:151692501-151693151	Rps7-ps3	transcribed_processed_pseudogene	MGI:3648396	overlapping_locus	2	373.505	-0.643463	0.220036	-2.92436	0.00345171	0.0361144	21.0799	23.1208	24.1574	10.7546	12.2813	22.8643
ENSMUSG00000020196.11	chr10:75481946-75600150	Cabin1	protein_coding	MGI:1298375	NA	2	387.954	0.422817	0.144788	2.92025	0.00349747	0.0365608	1.30148	1.38038	1.66457	2.07962	1.7895	1.91888
ENSMUSG00000022702.17	chr16:18695787-18789059	Hira	protein_coding	MGI:99430	overlapping_locus	2	632.151	-0.278962	0.0955798	-2.91863	0.00351569	0.0367072	4.22939	4.2137	3.50975	3.25435	3.37739	3.18495
ENSMUSG00000055027.18	chr6:71190924-71299217	Smyd1	protein_coding	MGI:104790	NA	1	13717.6	-0.235086	0.0805568	-2.91827	0.00351981	0.0367072	125.143	124.42	113.786	102.546	99.1299	106.655
ENSMUSG00000045316.6	chr17:25067866-25069338	Fahd1	protein_coding	MGI:1915886	NA	2	764.619	0.33883	0.11611	2.91818	0.0035208	0.0367072	17.708	16.2135	17.9339	21.9029	24.4693	19.4084
ENSMUSG00000041245.14	chrX:149981074-150103148	Wnk3	protein_coding	MGI:2652875	NA	2	45.7964	-1.26803	0.434594	-2.91772	0.00352598	0.0367287	0.295405	0.258818	0.131302	0.0850641	0.135268	0.0528228
ENSMUSG00000022201.17	chr15:12117917-12185769	Zfr	protein_coding	MGI:1341890	ncRNA_host	1	1835.75	-0.331783	0.113806	-2.91534	0.00355299	0.0369774	15.5932	14.506	11.6661	11.3277	10.3618	11.3224
ENSMUSG00000021684.18	chr13:95160962-95386844	Pde8b	protein_coding	MGI:2443999	NA	1	58.4358	1.14723	0.393633	2.91447	0.00356296	0.0370485	0.253075	0.140278	0.337639	0.784824	0.419895	0.423085
ENSMUSG00000078515.5	chr4:141404860-141450730	Ddi2	protein_coding	MGI:1917244	overlapping_locus	2	2318.38	-0.41773	0.143405	-2.91293	0.00358055	0.0371986	9.61198	10.7332	7.96918	6.38594	8.1975	6.54799
ENSMUSG00000042712.11	chrX:135145828-135147888	Tceal9	protein_coding	MGI:109567	NA	2	336.951	-0.363278	0.124726	-2.9126	0.00358432	0.0372051	12.8442	13.8434	12.6626	10.1864	9.69385	10.7277
ENSMUSG00000055639.17	chr14:98024289-98406979	Dach1	protein_coding	MGI:1277991	ncRNA_host	2	161.163	0.565616	0.194245	2.91187	0.00359273	0.0372596	0.686361	1.00024	1.05377	1.67882	1.497	0.940749
ENSMUSG00000035944.18	chr15:85716507-85743023	Ttc38	protein_coding	MGI:2146198	NA	2	343.899	0.510615	0.175439	2.91049	0.00360859	0.0373912	2.08795	2.70613	3.77162	4.29464	4.15519	3.60729
ENSMUSG00000052911.10	chr9:108356935-108367729	Lamb2	protein_coding	MGI:99916	NA	2	6346.69	-0.250387	0.0860529	-2.90968	0.00361798	0.0374556	35.2152	50.8187	40.3422	41.5348	39.2892	26.3574
ENSMUSG00000037904.15	chr12:110941787-110945474	Ankrd9	protein_coding	MGI:1921501	NA	2	3336.91	-0.416343	0.143158	-2.90828	0.00363424	0.037591	45.8701	41.2167	35.6095	27.7012	31.5893	31.9202
ENSMUSG00000025278.10	chr14:14518185-14651816	Flnb	protein_coding	MGI:2446089	NA	2	959.778	0.753549	0.259239	2.90677	0.00365176	0.0377392	1.72233	2.12354	2.32112	3.74798	2.33021	4.598
ENSMUSG00000059895.14	chr15:73594994-73630615	Ptp4a3	protein_coding	MGI:1277098	ncRNA_host	2	20057.9	-0.26828	0.0923247	-2.90583	0.00366279	0.0378035	177.371	202.248	131.479	159.075	165.901	102.232
ENSMUSG00000062526.5	chr18:67358114-67378901	Mppe1	protein_coding	MGI:2661311	NA	2	77.7615	0.967478	0.332959	2.90569	0.0036644	0.0378035	0.424819	0.941902	1.23884	1.62524	1.52456	1.74436
ENSMUSG00000060012.10	chr14:64884714-65047066	Kif13b	protein_coding	MGI:1098265	ncRNA_host	2	486.896	0.355918	0.122516	2.90507	0.00367168	0.037822	1.66142	1.65441	1.87388	1.95204	1.99818	2.72879
ENSMUSG00000031519.5	chr8:54982615-55040910	Asb5	protein_coding	MGI:1923544	NA	2	3828.52	-0.33992	0.117012	-2.90499	0.0036726	0.037822	70.5485	67.5222	62.4628	48.2916	47.8718	64.0035
ENSMUSG00000014496.9	chr14:31420725-31552608	Ankrd28	protein_coding	MGI:2145661	NA	2	2884.34	-0.268755	0.0925329	-2.90443	0.00367923	0.0378572	18.6806	16.2154	12.9399	13.3362	13.7166	12.2407
ENSMUSG00000107451.2	chr6:90455448-90456668	Gm44421	lncRNA	MGI:5690813	NA	2	150.867	-0.756862	0.260629	-2.90399	0.00368446	0.037878	3.76017	2.67211	6.12368	2.58198	2.3462	2.2396
ENSMUSG00000006412.11	chr1:171173238-171186822	Pfdn2	protein_coding	MGI:1276111	NA	2	1196.45	-0.375319	0.129301	-2.90268	0.00369983	0.038003	29.1462	29.7798	20.8158	20.3763	18.6078	21.7537
ENSMUSG00000048100.14	chr3:108479014-108490538	Taf13	protein_coding	MGI:1913500	NA	2	529.583	-0.307146	0.105848	-2.90176	0.00371072	0.0380817	8.31592	7.4026	7.46845	6.23836	6.61037	5.87417
ENSMUSG00000090086.8	chr5:123271786-123279729	AI480526	lncRNA	MGI:2140910	NA	2	348.323	0.724058	0.249619	2.90066	0.00372381	0.0381828	3.24603	2.07152	2.54367	3.57005	4.07315	5.34021
ENSMUSG00000004455.17	chr5:122296341-122313336	Ppp1cc	protein_coding	MGI:104872	NA	2	2251	-0.241436	0.0832456	-2.90028	0.00372827	0.0381953	30.9692	33.4292	35.9742	27.6611	28.8049	28.3461
ENSMUSG00000035764.6	chr16:32048930-32065976	Fbxo45	protein_coding	MGI:2447775	ncRNA_host	2	772.1	-0.275569	0.0950407	-2.89948	0.00373779	0.0382448	8.0405	7.91133	6.29912	6.11351	6.94226	5.27203
ENSMUSG00000036246.15	chr8:70261329-70274520	Gmip	protein_coding	MGI:1926066	NA	1	115.891	0.770797	0.265853	2.89933	0.00373958	0.0382448	0.522769	0.547972	0.728164	0.848471	0.95769	1.24374
ENSMUSG00000020629.13	chr12:28725230-28732174	Adi1	protein_coding	MGI:2144929	ncRNA_host	1	1812.91	-0.343253	0.118411	-2.89883	0.00374563	0.0382735	54.1975	32.5226	32.5513	26.5716	28.4317	37.5497
ENSMUSG00000025157.9	chr19:41921919-41932543	Zdhhc16	protein_coding	MGI:1921418	NA	2	393.764	-0.322794	0.111368	-2.89846	0.00375001	0.0382852	8.19667	7.53161	7.19226	5.67879	6.10023	6.4952
ENSMUSG00000024576.15	chr18:61688345-61723132	Csnk1a1	protein_coding	MGI:1934950	NA	1	5205.07	-0.257227	0.0888403	-2.89538	0.00378696	0.038629	23.1422	23.739	20.6176	18.0697	18.4615	20.0077
ENSMUSG00000005299.7	chr5:33897017-33940161	Letm1	protein_coding	MGI:1932557	overlapping_locus	2	2518.97	0.262031	0.0905517	2.89371	0.00380714	0.0388013	11.1202	12.773	9.22507	13.6298	15.1812	10.9002
ENSMUSG00000044224.17	chr15:10446842-10470602	Dnajc21	protein_coding	MGI:1925371	NA	2	2666.75	-0.264103	0.0913261	-2.89187	0.00382957	0.0389928	55.0944	58.0376	41.3104	44.4126	46.0699	37.4098
ENSMUSG00000022788.17	chr16:16234781-16418413	Fgd4	protein_coding	MGI:2183747	NA	2	443.981	-0.513058	0.177429	-2.89163	0.00383254	0.0389928	2.67183	1.50056	1.83775	0.973214	1.0135	2.5423
ENSMUSG00000073599.11	chr18:35846139-35855409	Ecscr	protein_coding	MGI:1915795	NA	2	123.511	0.56498	0.195419	2.89112	0.00383877	0.0390225	2.15977	1.96156	2.52182	3.71571	3.28508	2.87333
ENSMUSG00000002280.12	chr17:25992750-26002306	Ciao3	protein_coding	MGI:1914813	ncRNA_host	2	874.583	0.271015	0.093758	2.89059	0.00384525	0.0390548	10.9185	12.403	10.6252	14.0644	15.5462	11.5165
ENSMUSG00000009876.14	chr2:152596093-152606957	Cox4i2	protein_coding	MGI:2135755	NA	2	45.9569	0.952098	0.329666	2.88807	0.00387612	0.039333	1.08844	1.93219	1.88203	4.00077	3.96591	1.9323
ENSMUSG00000020687.14	chr11:104393571-104441446	Cdc27	protein_coding	MGI:102685	NA	2	618.476	-0.34837	0.120634	-2.88781	0.00387931	0.039333	4.23128	3.73192	3.81264	2.92262	3.01776	3.30241
ENSMUSG00000038235.5	chr1:171265103-171292171	F11r	protein_coding	MGI:1321398	NA	2	235.065	0.421872	0.146106	2.88743	0.003884	0.0393467	2.70495	2.93698	3.31299	4.55282	3.79575	3.71462
ENSMUSG00000030744.14	chr7:99127103-99132945	Rps3	protein_coding	MGI:1350917	ncRNA_host	2	5266.34	-0.196919	0.0682075	-2.88706	0.00388861	0.0393597	93.9503	111.582	102.876	88.0444	92.3919	88.0769
ENSMUSG00000011382.9	chr7:45120411-45138229	Dhdh	protein_coding	MGI:1919005	NA	1	1493.2	-0.454602	0.157491	-2.88653	0.00389521	0.0393731	14.9025	8.61256	11.1397	7.00387	8.42114	9.5254
ENSMUSG00000038848.15	chr2:180546170-180562742	Ythdf1	protein_coding	MGI:1917431	NA	2	1071.46	-0.249343	0.086385	-2.88641	0.00389661	0.0393731	12.8717	12.8826	12.1127	10.6308	10.9323	10.2613
ENSMUSG00000006356.11	chr12:113103856-113109126	Crip2	protein_coding	MGI:1915587	NA	2	578.789	0.480023	0.166428	2.88426	0.00392331	0.0396089	8.56287	10.8305	11.9494	16.6096	11.4428	15.4729
ENSMUSG00000055341.11	chr13:67436202-67454549	Zfp457	protein_coding	MGI:2664334	NA	2	54.3843	2.07348	0.719032	2.88372	0.00393012	0.0396439	0.781918	0.144471	0.034203	1.07267	0.768791	0.997594
ENSMUSG00000087370.4	chr13:41759383-41794831	Tmem170b	protein_coding	MGI:3647046	NA	2	1002.29	-0.267934	0.0929569	-2.88235	0.00394726	0.0397609	6.16062	5.35847	4.33885	4.23283	4.31551	4.48433
ENSMUSG00000024875.6	chr19:5138566-5142909	Yif1a	protein_coding	MGI:1915340	NA	2	709.162	0.356678	0.12375	2.88225	0.00394846	0.0397609	12.12	13.9255	14.7569	17.2123	17.8832	16.9193
ENSMUSG00000063273.12	chr3:51322569-51383928	Naa15	protein_coding	MGI:1922088	overlapping_locus	1	1970.26	-0.243597	0.0845781	-2.88015	0.0039749	0.0399929	10.9796	9.3821	9.51071	7.57787	8.64026	8.95469
ENSMUSG00000039242.11	chr13:14129054-14173688	B3galnt2	protein_coding	MGI:2145517	NA	2	2319.14	-0.359565	0.124875	-2.87941	0.0039842	0.0400312	23.5619	18.773	30.7214	17.9978	17.7355	20.7065
ENSMUSG00000030035.15	chr6:83096025-83098540	Wbp1	protein_coding	MGI:104710	NA	2	592.455	0.454125	0.15772	2.87931	0.00398551	0.0400312	8.0932	7.77403	8.92701	11.0423	8.57507	14.8231
ENSMUSG00000043531.17	chr19:50131737-50667084	Sorcs1	protein_coding	MGI:1929666	NA	2	35.6509	1.98361	0.688983	2.87904	0.00398888	0.0400312	0.0179312	0.0309219	0.0402635	0.0727572	0.0277675	0.647922
ENSMUSG00000001943.9	chr9:37450551-37455501	Vsig2	protein_coding	MGI:1928009	NA	2	56.1675	1.6007	0.55627	2.87756	0.00400765	0.040185	0.257574	0.721793	0.256323	1.25415	2.47631	0.396611
ENSMUSG00000026687.15	chr1:167177560-167196101	Aldh9a1	protein_coding	MGI:1861622	NA	2	161.389	1.06097	0.36874	2.87729	0.00401101	0.040185	0.750728	1.38288	2.28826	1.71692	2.64215	4.69743
ENSMUSG00000043999.7	chr11:30835358-30843729	Gpr75	protein_coding	MGI:2441843	overlapping_locus	2	40.6033	1.68005	0.584304	2.87529	0.00403652	0.0403948	0.137942	0.148674	0.242866	0.195899	0.302616	1.98596
ENSMUSG00000034290.10	chr12:85346288-85386136	Nek9	protein_coding	MGI:2387995	NA	2	6805.61	-0.175268	0.0609604	-2.87512	0.0040388	0.0403948	55.8011	48.6872	43.7981	41.7715	41.1192	48.1579
ENSMUSG00000047446.19	chr12:40055446-40088024	Arl4a	protein_coding	MGI:99437	NA	2	635.916	-0.310114	0.107877	-2.87471	0.00404393	0.0404119	3.15777	2.84703	3.00101	2.47752	2.48896	2.29195
ENSMUSG00000033526.17	chr2:121141042-121185877	Ppip5k1	protein_coding	MGI:2443281	NA	2	4632.72	0.364313	0.126763	2.87397	0.00405351	0.0404733	25.797	27.3767	17.7593	32.3799	30.1555	27.7248
ENSMUSG00000038467.16	chr2:154493625-154536705	Chmp4b	protein_coding	MGI:1922858	NA	2	3604.37	-0.210058	0.0731015	-2.87351	0.00405933	0.0404972	76.0929	79.3962	62.956	65.309	67.0323	56.1877
ENSMUSG00000000530.17	chr15:101026403-101043217	Acvrl1	protein_coding	MGI:1338946	NA	2	430.293	0.526805	0.183397	2.87248	0.0040726	0.0405952	1.80144	2.73125	3.04303	3.7087	3.07671	3.95412
ENSMUSG00000025762.17	chr3:40904263-40994633	Larp1b	protein_coding	MGI:1914604	ncRNA_host	1	1556.46	-0.241046	0.0839335	-2.87186	0.0040806	0.0406407	11.7682	11.3591	11.4658	9.46696	10.8131	9.01441
ENSMUSG00000030120.15	chr6:124908388-124913108	Mlf2	protein_coding	MGI:1353554	NA	2	4419.71	-0.224046	0.0780261	-2.87142	0.00408627	0.0406628	104.99	101.659	95.5388	81.2083	94.3821	82.8837
ENSMUSG00000054027.9	chr10:86614869-86674253	Nt5dc3	protein_coding	MGI:3513266	overlapping_locus	2	3580.85	-0.290895	0.101328	-2.87083	0.00409395	0.0407049	25.9806	21.3124	19.5648	16.5643	17.2087	20.6485
ENSMUSG00000074170.6	chr7:37916396-37927440	Plekhf1	protein_coding	MGI:1919537	NA	2	484.916	-0.5695	0.198469	-2.86946	0.00411171	0.0408472	3.15387	2.39703	3.33448	2.00708	1.95952	2.03109
ENSMUSG00000017344.5	chr11:78389946-78393150	Vtn	protein_coding	MGI:98940	NA	2	318.506	0.391335	0.136426	2.86847	0.00412459	0.0409406	6.53797	6.33571	5.43882	9.24971	9.27327	5.93337
ENSMUSG00000073131.13	chrX:70859530-70883363	Vma21	protein_coding	MGI:1914298	NA	2	884.923	-0.235852	0.0822329	-2.8681	0.0041295	0.0409549	5.21587	5.02747	4.48453	4.31125	4.41476	3.77421
ENSMUSG00000051323.17	chrX:132483609-132589736	Pcdh19	protein_coding	MGI:2685563	NA	2	122.674	0.613964	0.21418	2.86658	0.0041493	0.0410911	0.31822	0.320111	0.372036	0.551696	0.438029	0.582053
ENSMUSG00000023805.18	chr17:5991555-6094565	Synj2	protein_coding	MGI:1201671	NA	1	1307.32	0.631767	0.220396	2.86651	0.00415019	0.0410911	2.86012	4.5738	5.22418	6.20789	6.15202	6.69485
ENSMUSG00000026429.10	chr1:134890303-134901900	Ube2t	protein_coding	MGI:1914446	NA	2	71.6063	0.908049	0.316903	2.86538	0.00416508	0.0412039	0.675701	1.16523	2.0138	1.42569	1.67418	4.07853
ENSMUSG00000030224.11	chr6:137712076-137728930	Strap	protein_coding	MGI:1329037	NA	2	3232.95	-0.212265	0.0740999	-2.86458	0.0041756	0.0412734	44.3146	44.5485	39.503	35.1157	39.2186	36.2974
ENSMUSG00000040455.18	chr4:21767156-21837872	Usp45	protein_coding	MGI:101850	NA	2	596.863	-0.302036	0.105461	-2.86397	0.0041837	0.0413189	4.69514	4.58434	3.27602	3.41855	3.53824	3.10846
ENSMUSG00000037003.17	chr15:102008848-102024836	Tns2	protein_coding	MGI:2387586	NA	2	1616.53	0.433362	0.151358	2.86316	0.00419442	0.0413891	6.15612	6.79154	9.68378	9.24908	7.48994	14.1008
ENSMUSG00000021262.16	chr12:108520979-108654775	Evl	protein_coding	MGI:1194884	ncRNA_host	2	144.368	0.642164	0.224305	2.8629	0.00419783	0.0413891	1.30815	1.37182	1.56974	2.98393	1.96188	1.78564
ENSMUSG00000023186.15	chr9:38629564-38654633	Vwa5a	protein_coding	MGI:1915026	NA	2	645.371	-0.319175	0.111582	-2.86046	0.00423027	0.0416741	6.07995	5.03849	6.92263	4.41317	3.84743	6.42155
ENSMUSG00000030342.9	chr6:125437229-125471754	Cd9	protein_coding	MGI:88348	overlapping_locus	2	417.653	0.442995	0.15494	2.85914	0.00424788	0.0418127	4.74845	5.47913	12.1021	8.89693	7.08292	13.1179
ENSMUSG00000075254.13	chr16:33504740-33591946	Heg1	protein_coding	MGI:1924696	NA	2	806.692	0.513997	0.179806	2.85863	0.00425479	0.0418146	2.07096	1.76921	3.22614	3.56648	2.29811	4.09115
ENSMUSG00000021987.10	chr14:60502677-60539819	Mtmr6	protein_coding	MGI:2145637	NA	2	1842.92	-0.224504	0.0785365	-2.8586	0.00425515	0.0418146	19.1371	18.1804	15.921	15.5599	15.9748	13.945
ENSMUSG00000059013.13	chr2:32611067-32645524	Sh2d3c	protein_coding	MGI:1351631	NA	2	339.779	0.456174	0.159635	2.85761	0.0042684	0.0419099	1.15694	1.5379	1.44653	1.87776	2.08024	1.70426
ENSMUSG00000039770.7	chr17:73143448-73158190	Ypel5	protein_coding	MGI:1916937	NA	2	695.694	-0.319031	0.111683	-2.85657	0.00428239	0.0420123	7.92047	6.12249	6.99883	5.98735	5.33924	5.52435
ENSMUSG00000038403.11	chr3:96432488-96436526	Hjv	protein_coding	MGI:1916835	NA	2	14741.9	-0.361266	0.126517	-2.85549	0.0042971	0.0421216	347.395	231.431	306.88	206.471	234.437	243.478
ENSMUSG00000091898.9	chr14:30930269-30933686	Tnnc1	protein_coding	MGI:98779	NA	2	3485.77	1.82719	0.640148	2.85432	0.00431288	0.0422213	0.419853	1.56872	324.309	3.63432	8.30769	253.682
ENSMUSG00000034275.19	chr9:27210500-27268842	Igsf9b	protein_coding	MGI:2685354	NA	2	40.5077	1.06622	0.373584	2.85402	0.004317	0.0422213	0.0423309	0.0651772	0.0666596	0.142316	0.0795987	0.143398
ENSMUSG00000042644.10	chr17:27276278-27341197	Itpr3	protein_coding	MGI:96624	ncRNA_host	2	182.815	0.465008	0.162935	2.85394	0.00431801	0.0422213	0.525836	0.50163	0.822177	0.703642	0.73055	1.11632
ENSMUSG00000063564.14	chr11:51180747-51474745	Col23a1	protein_coding	MGI:2653243	NA	2	76.3764	0.835036	0.292683	2.85303	0.00433039	0.0423074	0.219893	0.204768	0.409371	0.292653	0.345058	0.937219
ENSMUSG00000029030.15	chr4:154241942-154245123	Tprgl	protein_coding	MGI:1915058	NA	2	2522.8	-0.256467	0.0899034	-2.8527	0.00433493	0.0423166	46.6718	43.5019	39.9508	36.8523	38.2511	33.7634
ENSMUSG00000009927.10	chr9:44318436-44321724	Rps25	protein_coding	MGI:1922867	NA	2	3802.27	-0.202494	0.0710139	-2.85148	0.00435168	0.0424451	96.0542	108.454	107.452	89.1022	93.9665	87.8822
ENSMUSG00000040850.18	chr11:30721726-30830361	Psme4	protein_coding	MGI:2143994	NA	2	9045.67	-0.329208	0.115546	-2.84916	0.00438348	0.0426285	55.1051	43.0815	35.5117	34.7052	33.5027	36.5539
ENSMUSG00000031902.11	chr8:106785472-106857169	Nfatc3	protein_coding	MGI:103296	NA	2	1374.12	-0.220896	0.0775334	-2.84905	0.00438506	0.0426285	9.86631	9.41706	7.66532	8.42493	8.01934	6.65126
ENSMUSG00000015843.11	chr1:167425953-167467192	Rxrg	protein_coding	MGI:98216	NA	2	1449.06	-0.520609	0.182733	-2.84901	0.00438551	0.0426285	32.3317	25.7754	24.79	16.0599	23.4918	17.9656
ENSMUSG00000095362.8	chr2:177473584-177482129	Gm14325	protein_coding	MGI:3702875	NA	2	408.594	-0.468642	0.164504	-2.84882	0.00438817	0.0426285	13.456	9.47566	9.69347	7.14474	8.0578	8.07629
ENSMUSG00000032766.10	chr6:4003904-4008445	Gng11	protein_coding	MGI:1913316	NA	2	285.884	0.560535	0.196762	2.84879	0.00438855	0.0426285	10.1014	11.0767	8.77481	17.7761	13.6307	12.8491
ENSMUSG00000085348.2	chr11:67102082-67128399	Myhas	lncRNA	MGI:3650429	NA	2	170.446	-1.59882	0.561302	-2.84841	0.0043938	0.0426445	19.6632	1.69544	1.87484	1.55531	2.02998	1.27241
ENSMUSG00000024897.10	chr19:23736251-23926960	Apba1	protein_coding	MGI:1860297	NA	2	46.4781	0.886568	0.311477	2.84634	0.00442248	0.0428734	0.146557	0.145322	0.282715	0.368694	0.25343	0.410716
ENSMUSG00000027668.14	chr3:32583614-32633388	Mfn1	protein_coding	MGI:1914664	NA	2	6915.98	0.259108	0.091037	2.84618	0.00442466	0.0428734	38.5764	43.5488	38.8584	51.4418	55.228	39.4508
ENSMUSG00000032293.9	chr9:54771073-54819814	Ireb2	protein_coding	MGI:1928268	NA	2	873.648	-0.279645	0.0982697	-2.84569	0.00443152	0.0429047	6.42309	6.70692	5.35036	5.45765	5.16489	4.57822
ENSMUSG00000032267.9	chr9:48896675-48953817	Usp28	protein_coding	MGI:2442293	NA	2	2136.1	-0.447574	0.157346	-2.84452	0.0044478	0.0430086	16.6159	27.6111	16.71	15.9283	14.3969	13.6132
ENSMUSG00000036752.5	chr2:25112172-25114714	Tubb4b	protein_coding	MGI:1915472	NA	2	4004.79	-0.458744	0.16128	-2.8444	0.00444954	0.0430086	62.1714	91.2123	79.4762	50.159	48.5683	73.2661
ENSMUSG00000036528.17	chr7:107194473-107347790	Ppfibp2	protein_coding	MGI:894649	overlapping_locus	2	523.498	0.657582	0.231283	2.84319	0.00446646	0.0431358	2.33711	2.77922	2.77898	3.44549	5.12713	3.85057
ENSMUSG00000040354.15	chr10:127132090-127147655	Mars1	protein_coding	MGI:1345633	NA	2	2125.27	-0.292568	0.102911	-2.84294	0.00447002	0.0431358	27.4653	31.3014	26.5589	22.33	27.4052	20.0941
ENSMUSG00000039316.15	chr17:50299285-50497702	Rftn1	protein_coding	MGI:1923688	NA	1	274.819	0.712965	0.25083	2.84242	0.00447726	0.0431705	1.22937	2.25512	2.2881	4.12755	2.43257	2.7244
ENSMUSG00000060681.16	chrX:55655117-55709590	Slc9a6	protein_coding	MGI:2443511	NA	1	1132.27	-0.234209	0.0824383	-2.84102	0.00449694	0.0433248	8.44511	8.88178	8.76339	7.36876	7.55569	7.24908
ENSMUSG00000041997.17	chr2:70542751-70656072	Tlk1	protein_coding	MGI:2441683	NA	2	1524.86	-0.20867	0.0735173	-2.83839	0.00453424	0.0436458	10.5908	9.77684	7.77907	8.46179	8.65278	7.11344
ENSMUSG00000022353.11	chr15:58813083-58953838	Mtss1	protein_coding	MGI:2384818	NA	2	414.695	0.393656	0.138702	2.83815	0.00453765	0.0436458	3.19001	2.38492	2.49062	3.1284	3.15399	4.35102
ENSMUSG00000109274.2	chr7:5062276-5065048	Gm45133	TEC	MGI:5753709	NA	2	38.7957	1.51252	0.533092	2.83726	0.0045503	0.0437318	0.291106	0.219627	0.33426	0.826831	0.929765	0.649953
ENSMUSG00000073838.11	chr7:126086533-126089903	Tufm	protein_coding	MGI:1923686	NA	2	3213.39	0.264917	0.0933949	2.83653	0.00456067	0.0437958	51.7082	50.7071	54.5906	63.7565	66.3724	59.0995
ENSMUSG00000038248.9	chr10:42878496-43050526	Sobp	protein_coding	MGI:1924427	NA	2	1382.28	-0.242146	0.0854036	-2.83531	0.0045781	0.0438987	11.2329	8.11973	9.32099	7.32366	7.17367	9.81861
ENSMUSG00000025786.18	chr9:122895225-122942270	Zdhhc3	protein_coding	MGI:1926134	NA	2	2554.06	-0.288204	0.10165	-2.83526	0.00457882	0.0438987	8.28935	8.47722	7.37405	6.64108	7.58514	5.61436
ENSMUSG00000027784.11	chr3:69224194-69468135	Ppm1l	protein_coding	MGI:2139740	NA	2	5735.79	-0.317703	0.112065	-2.83499	0.0045827	0.0439002	28.1598	24.608	20.6247	19.3196	17.5207	21.8743
ENSMUSG00000050628.7	chr11:116324920-116329903	Ubald2	protein_coding	MGI:1914635	NA	2	629.971	-0.382658	0.135128	-2.83182	0.00462844	0.0443002	17.6517	16.1854	17.6466	14.4316	13.7864	11.4602
ENSMUSG00000028463.15	chr4:43506966-43513729	Car9	protein_coding	MGI:2447188	NA	2	56.1295	-1.36933	0.483593	-2.83157	0.00463196	0.0443002	0.28467	0.774122	2.70883	0.195474	0.474739	0.364154
ENSMUSG00000030452.17	chr7:55581035-55612224	Nipa2	protein_coding	MGI:1913918	NA	2	892.362	-0.26001	0.0918449	-2.83097	0.00464066	0.0443475	9.87083	8.78626	8.89913	7.02589	7.85041	8.09305
ENSMUSG00000000399.11	chr6:126798684-126826088	Ndufa9	protein_coding	MGI:1913358	NA	2	7508.1	0.189379	0.0669367	2.82923	0.004666	0.0445535	166.763	184.301	151.4	200.791	212.56	161.575
ENSMUSG00000107689.2	chr6:86490873-86493255	Gm44386	lncRNA	MGI:5690778	NA	2	503.458	0.469866	0.16613	2.82831	0.00467947	0.044646	41.1616	38.736	23.2626	56.6902	52.2677	33.0302
ENSMUSG00000027469.17	chr2:152689884-152737241	Tpx2	protein_coding	MGI:1919369	ncRNA_host	2	114.881	-0.687744	0.243285	-2.82691	0.00469999	0.0448055	1.96204	0.792701	0.576739	0.555004	0.399323	0.980573
ENSMUSG00000044086.9	chr6:97215495-97229720	Lmod3	protein_coding	MGI:2444169	NA	2	4035.11	0.545644	0.193107	2.8256	0.0047192	0.0449524	54.4384	62.356	54.9725	91.7565	73.9075	85.3391
ENSMUSG00000026785.15	chr2:29967696-29981031	Pkn3	protein_coding	MGI:2388285	NA	1	188.554	0.760447	0.269202	2.82482	0.00473073	0.0450259	1.02045	1.52684	1.7461	2.6183	2.01402	2.49557
ENSMUSG00000004562.17	chr14:52222176-52243708	Arhgef40	protein_coding	MGI:2685515	NA	2	339.001	0.508974	0.180215	2.82426	0.00473898	0.045068	1.36178	1.5762	1.88091	2.57057	2.07823	2.16067
ENSMUSG00000046546.4	chr16:30418541-30421615	Fam43a	protein_coding	MGI:2676309	NA	2	593.149	0.886523	0.313972	2.82357	0.0047492	0.0451289	2.67438	3.50845	3.59708	7.46958	5.64049	4.84055
ENSMUSG00000027580.18	chr2:180869408-180883820	Helz2	protein_coding	MGI:2385169	NA	2	382.108	0.556993	0.197299	2.82309	0.00475635	0.0451604	0.84079	1.01325	1.00871	1.60803	1.09643	1.48392
ENSMUSG00000021279.6	chr12:111259410-111344152	Cdc42bpb	protein_coding	MGI:2136459	NA	2	1210.54	0.347791	0.12321	2.82274	0.00476151	0.0451731	4.94042	4.7117	5.56312	7.14516	6.22575	5.96096
ENSMUSG00000028557.11	chr4:109308295-109341925	Rnf11	protein_coding	MGI:1352759	NA	2	3885.26	-0.236742	0.0839255	-2.82086	0.00478946	0.0453739	38.9133	34.277	33.9407	29.9845	31.0522	29.6385
ENSMUSG00000023262.14	chr9:106310180-106315518	Acy1	protein_coding	MGI:87913	NA	2	195.481	0.513342	0.181984	2.8208	0.00479036	0.0453739	2.02004	2.83297	4.21793	4.52288	4.4975	3.61261
ENSMUSG00000029817.12	chr6:49220858-49240964	Tra2a	protein_coding	MGI:1933972	NA	2	662.282	0.484408	0.171843	2.8189	0.00481892	0.0456078	6.10021	8.70451	8.98042	11.0462	9.34775	12.8188
ENSMUSG00000019647.17	chr18:47368665-47501935	Sema6a	protein_coding	MGI:1203727	NA	2	162.067	0.530628	0.188305	2.81792	0.00483353	0.0456398	0.697155	0.776194	0.965782	1.33474	1.26476	0.958832
ENSMUSG00000075700.11	chr3:58484057-58500554	Selenot	protein_coding	MGI:1916477	NA	2	4446.64	-0.184633	0.065522	-2.81788	0.00483418	0.0456398	53.4887	58.866	55.9214	51.4218	48.6787	47.975
ENSMUSG00000003809.15	chr8:85613022-85620550	Gcdh	protein_coding	MGI:104541	NA	2	994.907	0.419958	0.149045	2.81767	0.00483739	0.0456398	10.4112	13.285	19.4546	18.6893	23.2718	14.9289
ENSMUSG00000027575.20	chr2:180609018-180624319	Arfgap1	protein_coding	MGI:2183559	NA	1	823.334	-0.259788	0.0922049	-2.81751	0.00483983	0.0456398	11.8731	10.2656	10.2355	8.95833	9.18463	8.83382
ENSMUSG00000039640.8	chr11:120375439-120379891	Mrpl12	protein_coding	MGI:1926273	NA	2	2430.18	0.275335	0.097738	2.81707	0.00484642	0.0456398	52.56	58.154	46.9098	66.3852	66.9599	57.0375
ENSMUSG00000051817.9	chr2:152235531-152239983	Sox12	protein_coding	MGI:98360	NA	2	29.1514	-1.09878	0.390051	-2.81703	0.00484707	0.0456398	0.611818	0.302843	0.222029	0.183889	0.157906	0.146545
ENSMUSG00000054252.19	chr5:33879018-33894412	Fgfr3	protein_coding	MGI:95524	NA	2	217.027	0.67285	0.238864	2.81687	0.00484937	0.0456398	0.491206	0.903544	0.935859	1.17815	0.963505	1.57994
ENSMUSG00000058833.12	chr8:70956945-70959402	Rex1bd	protein_coding	MGI:1913712	NA	2	1632.69	-0.319687	0.113527	-2.81595	0.00486332	0.0457177	86.1053	81.7836	70.4445	60.0992	70.0788	60.0397
ENSMUSG00000019795.18	chr10:7505137-7556900	Pcmt1	protein_coding	MGI:97502	NA	2	2971	-0.246985	0.0877145	-2.81578	0.00486592	0.0457177	29.1949	28.8203	24.5879	22.265	25.4601	21.6994
ENSMUSG00000024360.9	chr18:35035838-35065060	Etf1	protein_coding	MGI:2385071	NA	2	3460.66	-0.267986	0.0951805	-2.81556	0.00486927	0.0457177	34.51	40.6284	32.0296	29.9041	31.1685	27.7819
ENSMUSG00000030546.15	chr7:79369966-79382651	Plin1	protein_coding	MGI:1890505	NA	2	178.134	-2.92537	1.0391	-2.81529	0.00487332	0.0457193	0.553467	0.0561436	4.73187	0.0352273	0.00560181	1.85819
ENSMUSG00000022792.17	chr16:16120829-16127504	Yars2	protein_coding	MGI:1917370	NA	2	370.848	0.336783	0.119667	2.81434	0.00488771	0.0458093	4.1336	3.82662	3.65973	4.78469	5.30119	4.55904
ENSMUSG00000020720.14	chr11:107370310-107395188	Psmd12	protein_coding	MGI:1914247	overlapping_locus	1	2674.37	-0.211134	0.0750316	-2.81393	0.00489404	0.0458093	41.2342	43.6333	32.7746	36.4607	35.6675	29.3032
ENSMUSG00000031309.16	chrX:157993303-158151240	Rps6ka3	protein_coding	MGI:104557	NA	2	1990.24	-0.416361	0.147966	-2.81389	0.00489456	0.0458093	9.61204	10.9735	8.65978	6.22813	6.85235	9.14316
ENSMUSG00000033781.8	chr13:3684032-3703822	Asb13	protein_coding	MGI:2145525	ncRNA_host	2	738.816	-0.278354	0.0989654	-2.81263	0.00491375	0.0459525	6.50795	5.93618	5.68982	5.20489	5.50885	4.29836
ENSMUSG00000048701.14	chr10:69932951-70029030	Ccdc6	protein_coding	MGI:1923801	NA	2	2550.7	-0.272598	0.0969492	-2.81176	0.00492708	0.0460178	18.5584	17.5915	14.1433	14.0095	13.5814	13.7334
ENSMUSG00000024299.18	chr17:33743178-33772742	Adamts10	protein_coding	MGI:2449112	NA	2	203.869	0.620236	0.220608	2.81149	0.00493129	0.0460178	0.735505	0.933456	1.52333	1.82416	1.41199	1.48119
ENSMUSG00000038024.18	chr4:86666792-86768840	Dennd4c	protein_coding	MGI:1914769	NA	1	1345.24	-0.336694	0.119762	-2.81136	0.00493328	0.0460178	7.1259	6.23654	5.68978	4.87048	4.70993	5.48438
ENSMUSG00000100335.3	chr8:27304621-27374408	2310008N11Rik	lncRNA	MGI:1919566	NA	2	77.3269	1.17047	0.416367	2.81116	0.00493633	0.0460178	0.922397	2.02447	0	3.47051	3.41947	0.103295
ENSMUSG00000041445.10	chr14:34097422-34126244	Mmrn2	protein_coding	MGI:2385618	NA	2	530.887	0.565244	0.201262	2.80849	0.00497739	0.046364	3.50399	4.23635	4.72703	7.38703	4.4628	6.52924
ENSMUSG00000034557.15	chr4:108494663-108637995	Zfyve9	protein_coding	MGI:2652838	NA	1	2353.83	-0.311796	0.111041	-2.80795	0.0049858	0.0464057	16.1301	14.44	14.4654	12.3291	12.85	11.0654
ENSMUSG00000037072.17	chr3:144276065-144303441	Selenof	protein_coding	MGI:1927947	NA	2	1455.12	-0.317402	0.113053	-2.80755	0.00499202	0.046427	27.1445	25.6587	29.722	21.6779	20.4976	24.192
ENSMUSG00000029482.5	chr5:125552878-125594474	Aacs	protein_coding	MGI:1926144	ncRNA_host	2	138.903	0.947859	0.337783	2.80612	0.00501417	0.0465962	0.750823	0.418898	1.0909	1.25445	1.17789	1.88605
ENSMUSG00000026914.16	chr2:61542038-61630720	Psmd14	protein_coding	MGI:1913284	ncRNA_host	2	1236.94	-0.226361	0.0806749	-2.80584	0.00501859	0.0466006	19.4832	17.2619	15.2073	14.3881	14.9885	14.7659
ENSMUSG00000107476.4	chr6:48481271-48511766	Zfp862-ps	transcribed_unitary_pseudogene	MGI:1889827	overlapping_locus	2	286.717	-0.422915	0.150839	-2.80376	0.00505112	0.0468659	1.87396	2.33948	1.54639	1.84956	1.50513	1.0116
ENSMUSG00000020246.14	chr10:82531994-82578262	Hcfc2	protein_coding	MGI:1915183	NA	2	673.035	-0.24472	0.0873156	-2.8027	0.00506761	0.0469492	5.34418	5.01243	4.40497	4.12788	4.46787	3.82412
ENSMUSG00000021764.9	chr13:114424331-114524794	Ndufs4	protein_coding	MGI:1343135	NA	2	3377.97	0.291039	0.103843	2.80268	0.00506806	0.0469492	49.3139	46.929	38.7249	57.6864	55.3539	51.4094
ENSMUSG00000004939.8	chr10:81034004-81037885	Nmrk2	protein_coding	MGI:1916814	NA	2	3165.58	1.76896	0.631334	2.80194	0.00507962	0.046988	77.0119	37.9175	7.63253	117.131	66.287	111.744
ENSMUSG00000086350.2	chr1:178140893-178146114	B230369F24Rik	lncRNA	MGI:2443392	NA	2	42.7173	0.851833	0.304019	2.8019	0.00508021	0.046988	0.394159	0.40783	0.446554	0.687713	0.813838	0.740447
ENSMUSG00000031875.8	chr8:105066042-105074304	Cmtm3	protein_coding	MGI:2447162	NA	2	114.304	0.717558	0.256208	2.80069	0.00509938	0.0471283	0.791202	1.38715	2.35804	2.35427	1.97397	2.72897
ENSMUSG00000032690.17	chr5:120868398-120887918	Oas2	protein_coding	MGI:2180852	NA	2	40.0936	1.33818	0.477982	2.79964	0.00511604	0.0472194	0.135558	0.212515	0.482997	0.70005	0.349867	0.774205
ENSMUSG00000041278.11	chr11:43620339-43638835	Ttc1	protein_coding	MGI:1914077	NA	2	1358.85	-0.251897	0.0899774	-2.79956	0.00511724	0.0472194	25.5738	28.3019	23.6895	20.8543	23.9153	20.2626
ENSMUSG00000019256.18	chr12:35547973-35585037	Ahr	protein_coding	MGI:105043	NA	2	69.8311	0.848403	0.303087	2.79921	0.00512281	0.0472339	0.372845	0.454778	0.618157	1.1291	0.9529	0.588108
ENSMUSG00000030095.11	chr6:91450685-91465445	Tmem43	protein_coding	MGI:1921372	NA	2	616.677	-0.371519	0.132797	-2.79764	0.00514769	0.0474229	8.01232	7.49812	6.70006	5.33199	5.11802	6.83932
ENSMUSG00000027562.13	chr3:14951333-14965830	Car2	protein_coding	MGI:88269	NA	2	361.141	0.463586	0.165719	2.79741	0.00515134	0.0474229	3.6362	4.97955	7.79377	6.42242	7.46643	7.65746
ENSMUSG00000004535.13	chr6:52690714-52743765	Tax1bp1	protein_coding	MGI:1289308	NA	1	2273	-0.176484	0.0631062	-2.79663	0.00516394	0.0475018	21.4976	22.6734	21.0191	19.5622	19.4488	18.6759
ENSMUSG00000049670.10	chr19:42063381-42074796	Morn4	protein_coding	MGI:2449568	NA	2	150.175	-0.729397	0.260846	-2.79627	0.00516959	0.0475167	5.85808	2.97263	3.45013	1.75145	2.69109	2.71039
ENSMUSG00000007411.17	chr12:111540957-111622655	Mark3	protein_coding	MGI:1341865	NA	2	1482.1	-0.230864	0.082578	-2.7957	0.00517868	0.0475632	6.9674	7.7104	6.18235	6.346	6.16087	5.26974
ENSMUSG00000038250.10	chr8:81707362-81741557	Usp38	protein_coding	MGI:1922091	NA	2	928.471	-0.305523	0.109367	-2.79356	0.00521309	0.0478094	7.85459	6.84836	5.44571	5.41052	5.65714	5.06531
ENSMUSG00000055943.6	chr2:112285342-112302507	Emc7	protein_coding	MGI:1920274	NA	2	997.688	-0.224784	0.080466	-2.79353	0.00521358	0.0478094	6.84995	7.45192	5.85479	6.00159	6.04358	5.16841
ENSMUSG00000052812.6	chr12:4967404-5097394	Atad2b	protein_coding	MGI:2444798	NA	2	479.699	-0.450864	0.161532	-2.79118	0.00525169	0.0481214	2.60772	2.4424	1.83891	1.7857	1.66297	1.55372
ENSMUSG00000025340.15	chr5:130200639-130243183	Rabgef1	protein_coding	MGI:1929459	overlapping_locus	2	2235.41	-0.275932	0.098903	-2.78993	0.00527201	0.0482702	34.7301	35.0181	25.7666	27.7792	26.984	23.5098
ENSMUSG00000028017.8	chr3:129471214-129548965	Egf	protein_coding	MGI:95290	ncRNA_host	2	1193.49	-0.320681	0.115021	-2.78802	0.00530305	0.0485167	5.91309	5.37212	7.91654	4.92471	4.99126	5.32534
ENSMUSG00000021127.8	chr12:80154528-80159787	Zfp36l1	protein_coding	MGI:107946	NA	2	731.944	0.607428	0.217961	2.78686	0.0053221	0.0486533	5.88892	4.2629	7.49168	8.62676	8.00446	9.50942
ENSMUSG00000027566.16	chr2:179678167-179684226	Psma7	protein_coding	MGI:1347070	NA	2	2005.47	-0.328182	0.117883	-2.78396	0.00537	0.0490345	74.924	71.073	49.9793	51.8985	54.3383	47.5789
ENSMUSG00000043991.6	chr18:36414150-36425588	Pura	protein_coding	MGI:103079	NA	2	587.533	-0.484241	0.173948	-2.78383	0.0053721	0.0490345	4.2093	4.08949	4.10781	2.83171	3.23076	2.81167
ENSMUSG00000022610.11	chr15:89014787-89024824	Mapk12	protein_coding	MGI:1353438	NA	2	3717.76	-0.208832	0.0750234	-2.78356	0.00537662	0.0490378	74.175	80.2004	63.1471	72.2497	62.7256	53.5374
ENSMUSG00000055485.7	chr2:156857719-156921174	Soga1	protein_coding	MGI:2444575	NA	2	164.916	0.657954	0.236491	2.78216	0.00539988	0.0492119	0.594003	0.604798	0.557256	1.06665	0.795897	0.906858
ENSMUSG00000024725.14	chr19:18493501-18609187	Ostf1	protein_coding	MGI:700012	NA	2	483.534	-0.302713	0.108815	-2.7819	0.00540409	0.0492122	6.95951	5.8012	6.41826	5.23189	5.16248	5.15193
ENSMUSG00000024083.17	chr17:64588000-64638911	Pja2	protein_coding	MGI:2159342	ncRNA_host	2	4614.63	-0.224346	0.0807417	-2.77856	0.00546006	0.0496706	41.5753	37.9586	37.3694	35.3629	30.9272	33.723
ENSMUSG00000033623.14	chr5:108609098-108654842	Pcgf3	protein_coding	MGI:1916837	NA	2	1774.49	-0.383058	0.13787	-2.77839	0.00546283	0.0496706	9.5533	6.09401	8.50316	5.24365	6.23443	6.88755
ENSMUSG00000016520.8	chr5:146953465-147013396	Lnx2	protein_coding	MGI:2155959	NA	2	146.645	0.808023	0.290911	2.77756	0.0054769	0.0497601	0.808212	0.935525	0.725466	1.70708	1.28014	1.33654
ENSMUSG00000006301.18	chr1:74327406-74344781	Tmbim1	protein_coding	MGI:1916910	NA	2	1226.77	-0.246716	0.0888439	-2.77696	0.00548699	0.0498134	3.35935	3.95889	4.71159	3.24767	3.00371	3.85701
ENSMUSG00000028383.18	chr4:59581563-59618689	Hsdl2	protein_coding	MGI:1919729	NA	2	2182.91	0.621918	0.223993	2.77651	0.00549467	0.0498163	17.022	24.5136	27.3815	34.058	40.8392	30.3407
ENSMUSG00000045176.4	chr11:68950543-68952404	Borcs6	protein_coding	MGI:1919173	NA	2	529.106	-0.312167	0.112434	-2.77644	0.00549575	0.0498163	11.7325	13.2235	10.3044	9.80695	10.1262	8.41114
ENSMUSG00000066036.15	chr4:139079920-139216899	Ubr4	protein_coding	MGI:1916366	overlapping_locus	1	6884.28	-0.268736	0.0969164	-2.77287	0.0055565	0.0503284	16.4822	16.5081	15.8797	13.5453	12.3832	14.7435
ENSMUSG00000035150.16	chrX:93232313-93256468	Eif2s3x	protein_coding	MGI:1349431	NA	2	1728.53	-0.197081	0.0711039	-2.77174	0.00557578	0.0504643	12.9837	20.7239	19.6873	17.346	17.7627	11.4288
ENSMUSG00000002489.17	chr16:89583999-89940657	Tiam1	protein_coding	MGI:103306	NA	1	204.819	-0.826093	0.298141	-2.77082	0.00559161	0.0505317	2.13949	0.336633	0.471803	0.333728	0.306323	0.654065
ENSMUSG00000073125.11	chrX:72235828-72246526	Xlr3b	protein_coding	MGI:109505	NA	2	39.148	1.99389	0.719605	2.7708	0.00559179	0.0505317	0.612912	0.30596	0.434609	0.549745	2.31455	2.58292
ENSMUSG00000017843.15	chr12:110413554-110549496	Ppp2r5c	protein_coding	MGI:1349475	NA	2	2500.6	-0.176408	0.0637119	-2.76884	0.00562558	0.050798	13.2378	14.428	12.5942	12.3546	12.8873	10.4446
ENSMUSG00000059474.14	chr11:93776678-93837811	Mbtd1	protein_coding	MGI:2143977	NA	2	290.151	-0.418682	0.151288	-2.76745	0.00564962	0.0509762	0.947615	0.835853	0.811551	0.58633	0.730908	0.61496
ENSMUSG00000029761.17	chr6:34575435-34752408	Cald1	protein_coding	MGI:88250	overlapping_locus	1	802.309	0.428151	0.154807	2.76571	0.00567993	0.0511874	3.68505	4.62468	5.99621	7.06911	5.82602	6.02477
ENSMUSG00000028527.19	chr4:101276474-101324192	Ak4	protein_coding	MGI:87979	NA	2	404.727	0.794625	0.287324	2.76561	0.0056817	0.0511874	1.09679	2.91199	4.30932	5.33157	5.08973	2.81583
ENSMUSG00000028551.15	chr4:109518073-109524386	Cdkn2c	protein_coding	MGI:105388	NA	2	124.54	-0.618023	0.223543	-2.76467	0.00569813	0.0512962	1.72808	0.971748	2.63416	0.563994	0.862922	2.4295
ENSMUSG00000002900.18	chr12:31315233-31379643	Lamb1	protein_coding	MGI:96743	NA	1	654.967	0.689235	0.249389	2.7637	0.00571506	0.0514094	2.12413	3.29075	4.18267	6.46762	4.06933	4.38755
ENSMUSG00000021578.18	chr13:74498428-74513902	Ccdc127	protein_coding	MGI:1914683	NA	2	929.224	-0.268439	0.0971632	-2.76277	0.00573135	0.0514243	3.63654	4.21867	3.89159	3.40084	3.41371	2.95173
ENSMUSG00000031137.18	chrX:58107505-58613431	Fgf13	protein_coding	MGI:109178	ncRNA_host	2	869.799	-0.26013	0.0941578	-2.76271	0.00573242	0.0514243	9.38553	9.78881	9.29495	8.2041	8.32834	7.30372
ENSMUSG00000021660.15	chr13:98446404-98453514	Btf3	protein_coding	MGI:1202875	NA	2	2661.49	-0.176952	0.0640503	-2.7627	0.0057326	0.0514243	80.3562	82.8985	82.2037	69.4809	73.0621	74.5222
ENSMUSG00000036968.16	chr5:138185747-138192180	Cnpy4	protein_coding	MGI:1913705	NA	2	91.4781	0.702773	0.254388	2.76261	0.00573415	0.0514243	0.913992	0.80778	1.07747	1.29801	1.19127	2.15326
ENSMUSG00000117465.2	chr18:30400302-30405186	Gm49980	lncRNA	MGI:6275257	NA	2	24.0066	4.20924	1.52473	2.76065	0.00576858	0.0516938	0.895604	0.0367725	0	0	1.67308	1.49725
ENSMUSG00000040410.15	chr4:22357543-22434091	Fbxl4	protein_coding	MGI:2140367	ncRNA_host	2	529.276	-0.387771	0.140552	-2.75891	0.00579951	0.0519206	6.56226	4.50138	5.75145	4.12879	3.51763	5.29363
ENSMUSG00000068747.15	chr3:108191398-108268827	Sort1	protein_coding	MGI:1338015	overlapping_locus	2	2039.51	-0.589074	0.213531	-2.75873	0.00580268	0.0519206	14.6446	7.75019	17.7486	6.10229	7.65743	13.4488
ENSMUSG00000005873.7	chr18:34477938-34507123	Reep5	protein_coding	MGI:1270152	NA	2	3710.43	-0.353549	0.128187	-2.75806	0.00581454	0.0519873	50.02	43.5571	44.0653	36.7849	39.5312	31.538
ENSMUSG00000032578.8	chr9:107173225-107179983	Cish	protein_coding	MGI:103159	NA	2	408.358	2.19639	0.796847	2.75635	0.00584503	0.0522203	0.550189	0.521833	0.770132	0.880218	0.864172	19.1317
ENSMUSG00000021068.18	chr12:70058209-70160491	Nin	protein_coding	MGI:105108	NA	2	1062.68	-0.321991	0.116854	-2.75549	0.00586044	0.0523184	2.72587	3.27037	3.94708	2.31726	2.49301	3.15561
ENSMUSG00000046727.14	chr18:36475573-36536150	Cystm1	protein_coding	MGI:1913310	NA	2	2787.36	-0.253875	0.0921445	-2.75518	0.0058659	0.0523275	40.608	44.1987	33.2924	33.2223	33.9116	31.165
ENSMUSG00000045414.8	chr9:94399917-94420134	Dipk2a	protein_coding	MGI:1916111	NA	2	147.089	0.561245	0.203775	2.75423	0.00588302	0.0524406	0.93241	1.10131	1.83816	1.77246	1.86585	1.79367
ENSMUSG00000041415.12	chr12:104654001-104718211	Dicer1	polymorphic_pseudogene	MGI:2177178	NA	2	1882.64	-0.25057	0.091002	-2.75345	0.00589699	0.0525255	8.00514	6.95146	6.23983	5.81431	6.22028	5.68207
ENSMUSG00000015053.15	chr6:88170873-88184014	Gata2	protein_coding	MGI:95662	NA	2	240.75	0.582178	0.211606	2.75124	0.0059371	0.0528429	1.32877	2.01977	1.56036	3.00152	2.37588	1.97432
ENSMUSG00000024140.11	chr17:87061128-87140838	Epas1	protein_coding	MGI:109169	NA	2	5212.12	0.412118	0.149875	2.74975	0.00596401	0.0530424	26.9591	29.8132	28.1055	39.7344	42.0552	31.8472
ENSMUSG00000025537.13	chr5:129892262-129927390	Phkg1	protein_coding	MGI:97579	overlapping_locus	2	13093.8	-0.340015	0.123696	-2.74879	0.0059816	0.0531588	129.006	104.15	112.105	89.5273	97.9405	85.4451
ENSMUSG00000029404.16	chr5:124254152-124256259	Arl6ip4	protein_coding	MGI:1929500	NA	2	845.711	-0.283925	0.1033	-2.74854	0.00598619	0.0531595	25.3661	25.0392	19.1765	18.2284	21.4194	17.0888
ENSMUSG00000029998.15	chr6:86362988-86374136	Pcyox1	protein_coding	MGI:1914131	NA	2	1800.68	-0.277436	0.101056	-2.74536	0.00604437	0.0536358	16.9858	14.3318	17.5093	13.0598	13.4671	13.7393
ENSMUSG00000018474.19	chr11:69234099-69260232	Chd3	protein_coding	MGI:1344395	ncRNA_host	2	316.744	0.441476	0.160852	2.74461	0.00605821	0.0537182	1.17985	1.1356	1.50388	1.76464	1.30303	2.1505
ENSMUSG00000020076.8	chr10:62451674-62486997	Ddx50	protein_coding	MGI:2182303	NA	2	1146.29	-0.258023	0.0940508	-2.74344	0.00607982	0.0538694	15.9012	16.1407	13.3921	12.297	13.0663	12.4834
ENSMUSG00000042148.9	chr11:63853453-63970294	Cox10	protein_coding	MGI:1917633	NA	2	1450.82	0.284707	0.103802	2.7428	0.0060917	0.0538886	16.7288	17.1888	12.8084	19.7772	21.6695	15.4912
ENSMUSG00000044894.15	chr11:53318749-53321658	Uqcrq	protein_coding	MGI:107807	NA	2	7680	0.297855	0.108606	2.74253	0.00609677	0.0538886	117.437	163.174	129.425	177.076	182.342	142.355
ENSMUSG00000004096.10	chr9:14411913-14421873	Cwc15	protein_coding	MGI:1913320	NA	2	1372.43	-0.212832	0.0776059	-2.74247	0.00609784	0.0538886	36.6415	35.0693	32.394	29.0113	31.8415	28.7953
ENSMUSG00000040459.12	chr8:8715075-8740521	Arglu1	protein_coding	MGI:2442985	ncRNA_host	2	1539.92	-0.232314	0.0847138	-2.74234	0.00610026	0.0538886	19.1635	18.6385	15.3716	15.5628	16.4962	13.1423
ENSMUSG00000024556.5	chr18:73902974-73948509	Me2	protein_coding	MGI:2147351	NA	2	90.335	0.686098	0.250248	2.74167	0.00611276	0.0539587	0.741023	0.638938	0.538405	1.06001	0.797427	1.25319
ENSMUSG00000008958.15	chr3:95018333-95030362	Vps72	protein_coding	MGI:1202305	NA	2	1095.35	-0.33715	0.123014	-2.74074	0.00613005	0.0540709	28.1129	22.6703	21.1181	17.7701	15.8807	23.6422
ENSMUSG00000079283.3	chr1:138779721-138784590	2310009B15Rik	protein_coding	MGI:1916799	NA	2	179.079	-0.442353	0.161458	-2.73975	0.0061486	0.0541927	7.29488	7.83197	5.82196	5.95811	5.95195	3.71039
ENSMUSG00000055994.16	chr8:89373943-89415102	Nod2	protein_coding	MGI:2429397	NA	1	47.5038	1.35298	0.493875	2.73951	0.00615304	0.0541927	0.104521	0.117159	0.192024	0.381693	0.231995	0.399134
ENSMUSG00000063659.12	chr1:177269917-177278330	Zbtb18	protein_coding	MGI:1353609	NA	2	3684	-0.232796	0.0849903	-2.73908	0.00616108	0.054223	27.4044	25.0678	19.1129	21.3519	20.2682	18.6963
ENSMUSG00000021248.10	chr12:85389562-85421621	Tmed10	protein_coding	MGI:1915831	overlapping_locus	2	1725.83	-0.243103	0.0887676	-2.73865	0.00616926	0.0542546	39.2792	43.9632	43.1937	34.5831	36.3267	35.9014
ENSMUSG00000035606.9	chr9:102382949-102423438	Ky	protein_coding	MGI:96709	NA	2	7545.16	-0.626789	0.229111	-2.73575	0.0062239	0.0546943	68.2407	39.783	57.7071	30.8492	38.7184	37.069
ENSMUSG00000022100.15	chr14:70891686-71004068	Xpo7	protein_coding	MGI:1929705	NA	2	1684.42	-0.206614	0.0755452	-2.73496	0.0062387	0.0547836	4.40927	4.05992	3.85125	3.58342	3.6549	3.41946
ENSMUSG00000027030.16	chr2:68040789-68302612	Stk39	protein_coding	MGI:1858416	NA	2	83.3113	0.768181	0.281051	2.73325	0.00627126	0.054995	0.372475	0.435123	0.62544	0.877557	0.638821	0.888054
ENSMUSG00000020917.18	chr11:100367179-100418826	Acly	protein_coding	MGI:103251	ncRNA_host	2	561.464	0.417502	0.152752	2.73321	0.0062721	0.054995	2.48487	2.94188	3.93891	4.07955	3.3497	5.04467
ENSMUSG00000028906.18	chr4:131650724-131802632	Epb41	protein_coding	MGI:95401	ncRNA_host	2	4144.96	-0.294926	0.107939	-2.73233	0.00628879	0.0551004	11.4915	10.2381	8.71408	8.37724	9.72606	6.78538
ENSMUSG00000026150.15	chr1:82702611-82730115	Mff	protein_coding	MGI:1922984	overlapping_locus	2	2613.45	-0.216081	0.0791044	-2.7316	0.00630277	0.055182	49.8277	49.346	42.6123	43.5147	47.166	32.4423
ENSMUSG00000053158.11	chr7:80027504-80037694	Fes	protein_coding	MGI:95514	NA	2	120.209	0.670478	0.245671	2.72917	0.00634934	0.0555485	0.527484	0.74911	1.07043	1.38491	1.03039	1.25496
ENSMUSG00000032479.16	chr9:109760528-109913023	Map4	protein_coding	MGI:97178	overlapping_locus	2	20413.9	-0.283943	0.104096	-2.7277	0.00637776	0.0557204	51.7758	54.7699	50.7962	43.1806	36.115	51.3226
ENSMUSG00000020946.14	chr11:103567675-103588724	Gosr2	protein_coding	MGI:1927204	NA	2	1501.01	-0.286879	0.105174	-2.72767	0.00637843	0.0557204	18.6454	17.1024	18.9959	14.6422	16.0435	14.2147
ENSMUSG00000037012.19	chr10:62104634-62215687	Hk1	protein_coding	MGI:96103	NA	1	241.242	0.438721	0.16094	2.72599	0.00641097	0.0559632	0.888245	1.23237	1.6467	1.85449	1.51305	1.64126
ENSMUSG00000031842.16	chr8:71176369-71203835	Pde4c	protein_coding	MGI:99556	NA	2	215.635	1.03141	0.378455	2.72531	0.00642405	0.0560031	1.15982	0.622249	1.90984	2.90731	2.37478	2.19863
ENSMUSG00000029048.4	chr4:155158567-155170839	Rer1	protein_coding	MGI:1915080	NA	2	1375.45	-0.424863	0.155898	-2.72526	0.00642503	0.0560031	27.034	35.0845	28.2226	20.0652	20.7596	26.3808
ENSMUSG00000025745.13	chr5:30323302-30360160	Hadha	protein_coding	MGI:2135593	NA	2	12094.3	0.457976	0.168175	2.72322	0.00646495	0.0562844	68.157	94.0681	105.731	116.864	133.416	112.829
ENSMUSG00000097119.3	chr17:45744524-45753470	B230354K17Rik	lncRNA	MGI:2443272	NA	2	339.204	-0.358575	0.131678	-2.72312	0.00646684	0.0562844	2.42559	2.11271	2.31121	1.79492	1.77835	1.78769
ENSMUSG00000073889.11	chr4:41699989-41769474	Il11ra1	protein_coding	MGI:107426	overlapping_locus	2	782.331	0.377824	0.138786	2.72234	0.00648218	0.0563763	7.37689	9.51496	12.3095	12.8212	11.8697	12.5784
ENSMUSG00000036862.16	chr7:105402197-105436861	Dchs1	protein_coding	MGI:2685011	NA	2	171.539	0.806201	0.296303	2.72086	0.00651116	0.0565866	0.497885	0.620093	0.324664	0.931541	0.744828	0.837625
ENSMUSG00000056938.17	chr11:102992508-103003026	Acbd4	protein_coding	MGI:1914381	NA	2	392.58	-0.576608	0.211956	-2.72041	0.00652008	0.0566223	7.52926	5.53889	8.90245	4.53605	5.55522	4.67595
ENSMUSG00000020664.11	chr12:31381276-31401452	Dld	protein_coding	MGI:107450	NA	2	8288.55	0.213637	0.0785382	2.72017	0.00652485	0.0566223	115.759	118.587	100.196	135.559	147.033	107.295
ENSMUSG00000024376.8	chr18:33929380-34139972	Epb41l4a	protein_coding	MGI:103007	NA	2	82.7188	0.710436	0.261239	2.71949	0.00653825	0.0566968	0.574596	0.592109	0.909737	1.12593	0.998308	1.22572
ENSMUSG00000019087.14	chrX:73340703-73348327	Atp6ap1	protein_coding	MGI:109629	NA	2	2427.33	-0.215835	0.0793918	-2.71861	0.00655575	0.0568069	40.713	40.5645	38.9985	36.2279	35.3638	32.1043
ENSMUSG00000060376.8	chr7:25329371-25358406	Bckdha	protein_coding	MGI:107701	overlapping_locus	2	4101.84	0.261724	0.0963243	2.71712	0.00658532	0.0570213	64.1082	70.1666	76.7131	88.2892	93.0492	72.2126
ENSMUSG00000015143.16	chr12:80214321-80307145	Actn1	protein_coding	MGI:2137706	overlapping_locus	2	322.782	0.491914	0.181059	2.71687	0.00659018	0.0570214	1.28907	1.68373	3.14986	2.67222	1.81832	3.93835
ENSMUSG00000040048.15	chr17:24941034-24943452	Ndufb10	protein_coding	MGI:1915592	NA	1	6103.46	0.304213	0.112038	2.71527	0.0066222	0.0572565	205.832	237.01	214.945	283.821	280.606	247.424
ENSMUSG00000056999.17	chr19:37246142-37340010	Ide	protein_coding	MGI:96412	overlapping_locus	2	4397.91	-0.352961	0.130054	-2.71395	0.00664863	0.057443	22.873	24.8019	22.6452	19.3043	19.4024	16.7859
ENSMUSG00000018800.15	chr11:110160195-110228542	Abca5	protein_coding	MGI:2386607	NA	2	456.105	-0.530987	0.195686	-2.71347	0.0066583	0.0574844	1.88132	0.95911	2.15318	0.859518	1.051	1.48045
ENSMUSG00000000168.11	chr9:50545933-50571080	Dlat	protein_coding	MGI:2385311	NA	2	8055.6	0.287497	0.105968	2.71305	0.00666675	0.0575002	63.4053	71.7216	58.8426	86.8222	90.1524	62.171
ENSMUSG00000054509.8	chr14:56813076-56897251	Parp4	protein_coding	MGI:2685589	NA	2	554.081	0.285532	0.10525	2.71289	0.00666987	0.0575002	2.11699	2.24763	3.86028	2.92312	2.52395	4.52957
ENSMUSG00000005583.17	chr13:83652153-83815199	Mef2c	protein_coding	MGI:99458	NA	2	20256	-0.292494	0.107833	-2.71247	0.00667846	0.0575322	93.1203	119.69	91.0542	85.909	92.354	70.0773
ENSMUSG00000000787.13	chrX:13147209-13160291	Ddx3x	protein_coding	MGI:103064	NA	2	7936.42	-0.354023	0.130556	-2.71166	0.00669469	0.0575893	50.8072	85.2793	63.3804	63.2817	58.2577	36.0416
ENSMUSG00000090942.2	chr18:60426452-60436088	F830016B08Rik	protein_coding	MGI:3588218	NA	2	1378.96	-1.47175	0.542754	-2.71164	0.00669513	0.0575893	16.9093	14.1048	22.8938	3.22874	2.18801	31.6588
ENSMUSG00000031217.9	chrX:98179736-98192597	Efnb1	protein_coding	MGI:102708	NA	2	271.274	0.419537	0.15473	2.71141	0.00669973	0.0575893	1.79769	2.63381	2.52401	3.33284	3.13087	2.79958
ENSMUSG00000031808.8	chr8:72021526-72039352	Slc27a1	protein_coding	MGI:1347098	NA	2	2865.82	0.667793	0.246337	2.71089	0.00671033	0.0576047	16.7372	29.5962	28.0272	33.6893	42.3113	40.1576
ENSMUSG00000001794.14	chr7:29886367-29898236	Capns1	protein_coding	MGI:88266	NA	2	3464.41	-0.189665	0.0699676	-2.71075	0.00671313	0.0576047	63.5672	62.8536	55.508	57.1016	52.9215	49.4635
ENSMUSG00000026974.12	chr2:24839804-24852087	Zmynd19	protein_coding	MGI:1914437	NA	2	470.119	-0.323662	0.119414	-2.71043	0.00671967	0.0576047	5.03555	4.50883	4.3291	3.63457	4.05513	3.36988
ENSMUSG00000025352.7	chr10:128718164-128727587	Gdf11	protein_coding	MGI:1338027	NA	2	181.91	-0.668651	0.246702	-2.71036	0.00672103	0.0576047	2.74494	1.38152	2.28949	0.98779	1.30791	1.71361
ENSMUSG00000026469.15	chr1:155151447-155293161	Xpr1	protein_coding	MGI:97932	NA	2	3126.4	-0.424282	0.15663	-2.70882	0.00675228	0.0578257	13.774	10.0771	10.1165	8.88616	7.41668	8.74183
ENSMUSG00000028251.6	chr4:21757382-21767212	Tstd3	protein_coding	MGI:1924282	NA	2	408.004	0.426885	0.157603	2.70861	0.00675662	0.0578257	8.19692	7.91691	8.11331	10.7514	13.825	8.57092
ENSMUSG00000044229.10	chr9:48073321-48311325	Nxpe4	protein_coding	MGI:1924792	NA	2	37.5148	1.57824	0.582819	2.70794	0.00677027	0.0579005	0.0640723	0.110491	0.162555	0.170843	0.675639	0.197316
ENSMUSG00000028949.14	chr5:24797620-24829409	Smarcd3	protein_coding	MGI:1914243	NA	2	5500.8	-0.313951	0.115977	-2.70702	0.00678897	0.0580184	119.265	91.4274	81.9278	70.2283	91.5386	71.3463
ENSMUSG00000022946.11	chr16:93508792-93607478	Dop1b	protein_coding	MGI:1917278	NA	2	1219.83	-0.480168	0.177489	-2.70533	0.00682361	0.0582722	5.849	4.20986	9.40535	3.92679	4.48048	5.09267
ENSMUSG00000022517.18	chr16:4704113-4756160	Mgrn1	protein_coding	MGI:2447670	NA	2	2306.44	0.231754	0.0856883	2.70461	0.00683837	0.058356	17.6669	17.6865	16.0817	22.6925	20.905	17.0892
ENSMUSG00000025425.19	chr18:77273535-77346467	St8sia5	protein_coding	MGI:109243	NA	2	1062.19	-0.346665	0.128205	-2.70399	0.00685129	0.0584241	8.32203	8.04048	6.89944	7.72579	7.06205	4.12458
ENSMUSG00000042129.9	chr6:116609969-116650913	Rassf4	protein_coding	MGI:2386853	ncRNA_host	2	76.3961	0.986684	0.36503	2.70302	0.00687118	0.0585367	0.0814823	0.210771	0.449094	0.438824	0.302068	0.597674
ENSMUSG00000038388.15	chr6:50087221-50175919	Pals2	protein_coding	MGI:1927340	overlapping_locus	2	1574.12	-0.288671	0.106807	-2.70273	0.00687735	0.0585367	18.7924	23.3642	20.2728	18.8199	16.4525	15.8607
ENSMUSG00000025544.14	chr14:122344450-122397016	Tm9sf2	protein_coding	MGI:1915309	overlapping_locus	2	2319.23	-0.228567	0.0845847	-2.70223	0.00688771	0.0585367	29.375	28.2405	30.2106	24.853	24.3916	25.8337
ENSMUSG00000097974.2	chr7:99275143-99280918	Gm10605	lncRNA	MGI:3642596	NA	2	105.576	-0.826017	0.305685	-2.70218	0.00688864	0.0585367	1.39949	1.38953	1.5496	1.19307	1.23318	0.339564
ENSMUSG00000063296.6	chr15:94527131-94993979	Tmem117	protein_coding	MGI:2444580	NA	2	495.565	-0.681414	0.252187	-2.70202	0.00689199	0.0585367	8.67178	12.1043	5.90188	4.98789	4.90759	6.09595
ENSMUSG00000029499.12	chr5:110422148-110434052	Pxmp2	protein_coding	MGI:107487	NA	2	833.384	0.271234	0.100391	2.70177	0.00689715	0.0585367	20.8736	23.9301	29.521	31.3339	31.2852	26.7506
ENSMUSG00000068329.13	chr6:83028247-83032146	Htra2	protein_coding	MGI:1928676	NA	2	373.137	0.407653	0.150898	2.70151	0.00690251	0.0585367	5.03019	4.65231	6.18724	7.25703	6.87965	6.93781
ENSMUSG00000029310.14	chr5:104194172-104213245	Nudt9	protein_coding	MGI:1921417	ncRNA_host	1	1378.67	-0.237194	0.0878033	-2.70142	0.00690432	0.0585367	26.7578	24.4323	22.7675	19.398	22.2095	20.9117
ENSMUSG00000048856.10	chr12:108801972-108822741	Slc25a47	protein_coding	MGI:2144766	ncRNA_host	2	80.5147	0.968943	0.358709	2.70119	0.00690913	0.0585367	0.422549	0.772396	0.445079	1.23446	0.820108	1.1243
ENSMUSG00000023965.14	chr17:63364447-63807012	Fbxl17	protein_coding	MGI:1354704	ncRNA_host	1	1562.71	-0.352361	0.130463	-2.70085	0.00691619	0.0585544	12.9463	11.9028	10.0697	9.95788	8.41231	8.85111
ENSMUSG00000021192.17	chr12:102435394-102464166	Golga5	protein_coding	MGI:1351475	NA	2	994.025	-0.206976	0.0766836	-2.69909	0.00695302	0.0588241	11.7532	11.5854	10.6754	9.8586	10.0107	9.56485
ENSMUSG00000020014.19	chr10:92611481-92917480	Cfap54	protein_coding	MGI:1922208	NA	1	40.8667	1.11664	0.413826	2.69833	0.00696886	0.0589159	0.102173	0.0425298	0.0625702	0.225872	0.167314	0.0846302
ENSMUSG00000026775.10	chr2:23046381-23089272	Yme1l1	protein_coding	MGI:1351651	NA	2	1965.75	-0.197224	0.073166	-2.69557	0.0070268	0.0593631	10.1799	9.38042	9.71768	8.38386	8.62674	8.5126
ENSMUSG00000025162.19	chr11:120849816-120882156	Csnk1d	protein_coding	MGI:1355272	NA	2	1912.15	-0.273933	0.101683	-2.69398	0.00706042	0.0596045	12.8984	16.0585	13.7762	12.0629	11.8329	11.358
ENSMUSG00000027782.11	chr3:68974482-69034446	Kpna4	protein_coding	MGI:1100848	ncRNA_host	2	5512.23	-0.366307	0.13608	-2.69186	0.00710546	0.0599419	28.189	28.4952	20.8605	21.2866	16.5054	22.3569
ENSMUSG00000020454.18	chr11:3152392-3194588	Eif4enif1	protein_coding	MGI:1921453	NA	2	933.513	-0.211578	0.0786388	-2.6905	0.00713447	0.0601436	8.57666	8.82969	7.60579	7.33093	7.49955	6.74748
ENSMUSG00000075701.11	chr7:65729397-65739153	Selenos	protein_coding	MGI:95994	NA	2	506.182	-0.467359	0.173818	-2.68879	0.0071711	0.0604092	11.0304	13.0271	25.0456	10.6218	11.6681	11.2672
ENSMUSG00000026977.18	chr2:60040231-60081020	Marchf7	protein_coding	MGI:1931053	NA	2	878.421	-0.281706	0.104786	-2.6884	0.00717955	0.0604373	3.54443	3.49573	3.55323	2.93153	2.75441	3.05033
ENSMUSG00000030016.15	chr6:83844091-83966532	Zfp638	protein_coding	MGI:1203484	overlapping_locus	2	1005.78	-0.331737	0.123417	-2.68794	0.00718948	0.0604686	4.56036	4.11042	3.83585	3.21502	2.87648	3.91825
ENSMUSG00000003184.16	chr7:44647072-44652272	Irf3	protein_coding	MGI:1859179	NA	2	400.957	0.291031	0.10828	2.68775	0.00719352	0.0604686	4.71517	5.01424	5.9315	6.10636	6.50056	6.46175
ENSMUSG00000060961.17	chr5:89034345-89387512	Slc4a4	protein_coding	MGI:1927555	overlapping_locus	2	673.671	-0.582313	0.216763	-2.6864	0.00722259	0.0606698	1.99441	2.46049	2.62812	1.23916	2.19685	1.28871
ENSMUSG00000040296.16	chr4:40203773-40239828	Ddx58	protein_coding	MGI:2442858	NA	2	92.2508	0.756848	0.281818	2.68559	0.00724011	0.0607705	0.229003	0.438104	0.552197	0.74336	0.587348	0.643528
ENSMUSG00000030532.7	chr7:79992852-80000295	Hddc3	protein_coding	MGI:1915945	NA	2	253.545	-0.889455	0.331222	-2.68537	0.00724488	0.0607705	4.1832	2.05122	3.74853	2.09324	0.807155	2.57651
ENSMUSG00000001403.14	chr2:164611818-164620742	Ube2c	protein_coding	MGI:1915862	NA	2	90.6883	-0.653162	0.243313	-2.68445	0.00726483	0.0608304	2.11512	1.25486	1.39035	0.771616	0.911498	1.32664
ENSMUSG00000086938.10	chr19:5456768-5472875	4930481A15Rik	lncRNA	MGI:1922181	NA	2	34.51	-1.72889	0.644038	-2.68445	0.00726493	0.0608304	0.585607	0.252466	0.593107	0.146225	0.139515	0.152598
ENSMUSG00000090150.11	chr9:103940576-104004924	Acad11	protein_coding	MGI:2143169	overlapping_locus	1	2613.54	0.3019	0.112467	2.68433	0.00726749	0.0608304	18.2159	19.7327	23.6098	24.5061	29.1506	22.3076
ENSMUSG00000035890.10	chr10:79594349-79602786	Rnf126	protein_coding	MGI:1917544	NA	2	1109.03	-0.304652	0.113506	-2.68401	0.00727439	0.060845	29.6742	22.7993	27.315	18.2107	20.5451	26.1071
ENSMUSG00000010660.4	chr9:118900595-118922570	Plcd1	protein_coding	MGI:97614	NA	2	235.93	0.449372	0.167562	2.68183	0.00732213	0.061201	2.13684	2.33473	3.11664	3.81234	3.41849	3.00397
ENSMUSG00000028692.15	chr4:116493707-116508877	Akr1a1	protein_coding	MGI:1929955	NA	2	3276.94	-0.248372	0.0926613	-2.68043	0.0073528	0.0613748	44.765	47.1244	44.6823	36.2233	39.8786	38.8036
ENSMUSG00000028454.17	chr4:43017635-43025819	Pigo	protein_coding	MGI:1861452	NA	2	332.816	0.445081	0.16605	2.6804	0.00735333	0.0613748	2.36771	2.79314	2.64747	3.74728	3.83072	3.06174
ENSMUSG00000036242.16	chr14:49913409-50020840	Armh4	protein_coding	MGI:1914669	overlapping_locus	2	103.083	-0.860197	0.320993	-2.6798	0.00736659	0.0614323	0.799967	0.464533	0.249947	0.344466	0.342705	0.140775
ENSMUSG00000030189.16	chr6:131341818-131365439	Ybx3	protein_coding	MGI:2137670	ncRNA_host	2	30391.9	-0.264246	0.0986132	-2.67962	0.00737063	0.0614323	446.88	380.712	489.897	296.613	364.579	440.861
ENSMUSG00000052852.9	chr6:71684545-71787694	Reep1	protein_coding	MGI:1098827	NA	2	2844.52	-0.398251	0.148678	-2.67861	0.00739277	0.0615693	38.7963	27.9504	23.8939	23.4486	26.5495	18.1595
ENSMUSG00000009376.16	chr6:17463799-17573979	Met	protein_coding	MGI:96969	NA	2	604.349	-0.320906	0.119813	-2.6784	0.0073975	0.0615693	3.1264	2.98475	3.46322	2.3183	2.17055	3.29013
ENSMUSG00000019837.9	chr10:40123699-40134104	Gtf3c6	protein_coding	MGI:1914621	NA	2	634.06	-0.249409	0.0931286	-2.67811	0.00740387	0.0615789	9.91382	9.83805	7.7711	7.73805	8.52276	6.78332
ENSMUSG00000033671.19	chr1:155720710-155849001	Cep350	protein_coding	MGI:1921331	NA	1	1762.3	-0.454598	0.169813	-2.67705	0.00742737	0.0617309	5.17128	5.6222	4.31454	3.53365	3.10438	4.58069
ENSMUSG00000021820.19	chr14:20784943-20844156	Camk2g	protein_coding	MGI:88259	NA	2	5887.69	-0.275307	0.102913	-2.67514	0.00746991	0.0620033	59.4504	55.6983	50.2832	52.1762	46.7595	38.2725
ENSMUSG00000040631.9	chr8:95590456-95602958	Dok4	protein_coding	MGI:2148865	NA	2	209.772	0.451237	0.16868	2.6751	0.00747066	0.0620033	2.24673	2.93431	1.97278	3.53927	3.4195	2.8083
ENSMUSG00000059058.8	chr1:171538656-171538850	Tma7-ps	processed_pseudogene	MGI:3705453	NA	2	406.216	-0.324532	0.121344	-2.67449	0.00748427	0.0620726	80.9825	86.1115	83.9757	61.9393	73.5876	64.5393
ENSMUSG00000047412.17	chr9:30941940-30987181	Zbtb44	protein_coding	MGI:1925123	NA	2	1297.59	0.281153	0.105144	2.67397	0.00749587	0.0621252	4.64501	4.66641	3.85341	6.07065	5.45056	4.52428
ENSMUSG00000040441.13	chr10:127007380-127016514	Slc26a10	protein_coding	MGI:2143920	NA	2	315.42	0.911299	0.340997	2.67246	0.00752984	0.0623629	1.91816	2.5295	4.74803	5.40237	9.8763	2.98831
ENSMUSG00000037416.14	chr18:49965737-50098540	Dmxl1	protein_coding	MGI:2443926	NA	2	1325.06	-0.434472	0.162668	-2.67092	0.00756437	0.062605	4.36373	4.42007	3.80922	2.91593	2.8996	3.56556
ENSMUSG00000037894.14	chr3:137570248-137572683	H2az1	protein_coding	MGI:1888388	NA	2	1277.44	-0.298596	0.111812	-2.67051	0.00757368	0.0626381	55.927	47.2051	47.0243	38.0321	40.1727	43.574
ENSMUSG00000033022.9	chr18:46846260-46861462	Cdo1	protein_coding	MGI:105925	NA	2	83.7963	-1.76965	0.662877	-2.66966	0.00759291	0.0627532	0.460331	0.238149	4.81117	0.0996178	0.0792056	3.15659
ENSMUSG00000061132.14	chr19:40917371-40982978	Blnk	protein_coding	MGI:96878	NA	2	41.2215	1.4576	0.546139	2.66893	0.00760937	0.0628452	0.264652	0.186703	0.839825	1.1129	1.25433	0.696471
ENSMUSG00000004098.8	chr9:20681346-20726363	Col5a3	protein_coding	MGI:1858212	NA	2	785.282	0.605	0.226739	2.66827	0.0076244	0.0628844	3.74332	6.24198	3.45878	10.05	6.60966	4.28106
ENSMUSG00000051910.14	chr7:115070107-115637979	Sox6	protein_coding	MGI:98368	NA	2	4047.26	-0.345106	0.129338	-2.66825	0.00762478	0.0628844	20.5211	16.3374	14.9182	13.8722	14.8009	11.9054
ENSMUSG00000042453.15	chr5:22089452-22549700	Reln	protein_coding	MGI:103022	overlapping_locus	2	78.7245	0.830681	0.311381	2.66773	0.00763657	0.0629267	0.0568878	0.0521164	0.252574	0.106757	0.0954352	0.437977
ENSMUSG00000051391.10	chr5:135937263-135963470	Ywhag	protein_coding	MGI:108109	NA	2	8551.36	-0.259196	0.0971662	-2.66755	0.00764057	0.0629267	97.1284	90.8135	75.2597	69.2527	72.0686	78.2558
ENSMUSG00000044906.7	chr18:70585284-70605580	4930503L19Rik	protein_coding	MGI:1922045	NA	2	116.668	0.63495	0.238084	2.66691	0.00765522	0.0630034	0.80174	0.604879	0.745239	1.21992	0.931156	1.19042
ENSMUSG00000044037.16	chr9:110708938-110729598	Als2cl	protein_coding	MGI:2447532	NA	2	301.114	0.580231	0.217667	2.66568	0.00768335	0.0631909	1.57581	1.44222	1.90847	2.34327	2.56747	2.4454
ENSMUSG00000009633.4	chr1:192954469-192955525	G0s2	protein_coding	MGI:1316737	NA	2	850.514	1.46438	0.549424	2.66531	0.00769179	0.0632162	24.7917	43.0025	11.5286	65.1984	89.0718	66.4659
ENSMUSG00000028542.18	chr4:117691703-117732393	Slc6a9	protein_coding	MGI:95760	NA	1	148.867	-0.797754	0.299391	-2.66459	0.00770827	0.0632524	1.25594	0.786737	2.24823	0.862414	0.825612	0.700829
ENSMUSG00000033184.15	chr18:46693302-46730602	Tmed7	protein_coding	MGI:1913926	overlapping_locus	2	367.752	-0.332285	0.124721	-2.66423	0.00771641	0.0632524	7.31628	6.38797	6.89735	5.58142	5.00365	5.81403
ENSMUSG00000027077.8	chr2:84641520-84652996	Smtnl1	protein_coding	MGI:1915928	NA	2	3211.07	1.44536	0.54255	2.664	0.00772165	0.0632524	12.6919	35.0041	59.0389	84.0015	47.4272	131.109
ENSMUSG00000042155.4	chr2:69652288-69666995	Klhl23	protein_coding	MGI:2683536	NA	2	340.853	0.619386	0.232506	2.66396	0.00772261	0.0632524	1.66979	1.50159	2.79168	2.74338	2.33195	3.88037
ENSMUSG00000023961.17	chr17:44407199-44416700	Enpp4	protein_coding	MGI:2682634	NA	2	1830.54	-0.209459	0.0786275	-2.66395	0.00772299	0.0632524	17.3706	16.5612	15.7194	14.7251	14.3864	13.8063
ENSMUSG00000022817.16	chr16:33650035-33769708	Itgb5	protein_coding	MGI:96614	NA	2	2550.6	-0.288308	0.108244	-2.66351	0.00773308	0.0632911	32.39	28.2218	25.0009	25.7434	21.6229	22.5209
ENSMUSG00000003346.15	chr10:80419488-80426175	Abhd17a	protein_coding	MGI:106388	overlapping_locus	1	1449.96	-0.326401	0.122726	-2.65958	0.00782371	0.0639497	40.538	39.9306	32.9738	28.8215	34.0055	27.3584
ENSMUSG00000021190.15	chr12:102360343-102406072	Lgmn	protein_coding	MGI:1330838	NA	2	800.494	0.328545	0.123534	2.65956	0.00782438	0.0639497	10.0005	10.7785	14.7135	14.0805	11.8341	19.0019
ENSMUSG00000056492.7	chr17:43671342-43770448	Adgrf5	protein_coding	MGI:2182928	ncRNA_host	2	3044.78	0.381597	0.143499	2.65924	0.00783176	0.0639635	9.77129	9.95088	12.1838	15.2775	13.5446	12.754
ENSMUSG00000006498.17	chr10:79690261-79700605	Ptbp1	protein_coding	MGI:97791	ncRNA_host	2	392.035	0.439319	0.165218	2.65902	0.00783691	0.0639635	2.49842	2.94374	3.68486	4.46901	3.98373	3.74634
ENSMUSG00000022952.18	chr16:92398354-92623037	Runx1	protein_coding	MGI:99852	NA	1	66.9928	0.761807	0.286687	2.65728	0.00787749	0.0642479	0.126691	0.168058	0.18501	0.264939	0.186128	0.372149
ENSMUSG00000028393.11	chr4:62427406-62438155	Alad	protein_coding	MGI:96853	NA	2	801.157	0.519581	0.195554	2.65697	0.00788456	0.0642479	12.2693	11.9508	10.8659	19.3007	15.5895	15.5123
ENSMUSG00000010021.14	chr11:114656214-114681565	Kif19a	protein_coding	MGI:2447024	NA	2	25.8904	1.36718	0.514592	2.65682	0.00788809	0.0642479	0.0655736	0.101772	0.184722	0.159642	0.209859	0.589664
ENSMUSG00000047067.8	chr1:92834703-92836157	Dusp28	protein_coding	MGI:1914696	NA	2	591.602	-0.35371	0.133199	-2.65551	0.00791891	0.0644545	18.4685	17.6126	17.0238	14.6447	15.8754	11.446
ENSMUSG00000026883.18	chr2:35448278-35621006	Dab2ip	protein_coding	MGI:1916851	NA	1	2839.64	-0.398501	0.150114	-2.65466	0.00793893	0.0645695	12.7542	17.8049	13.5812	12.6652	10.8016	9.707
ENSMUSG00000028189.13	chr3:146156225-146171604	Ctbs	protein_coding	MGI:1921495	NA	2	120.664	-0.501286	0.188848	-2.65444	0.00794398	0.0645695	1.78781	1.44252	1.99885	1.1447	1.10064	1.45472
ENSMUSG00000028367.6	chr4:57943373-57956411	Txn1	protein_coding	MGI:98874	NA	2	713.991	-0.298999	0.112735	-2.65223	0.00799612	0.0649485	24.0981	29.0151	26.4577	21.1921	21.6074	21.968
ENSMUSG00000026784.15	chr2:22785534-22830278	Pdss1	protein_coding	MGI:1889278	ncRNA_host	1	202.431	0.571767	0.215644	2.65144	0.00801486	0.0650559	2.35038	2.36692	1.88984	2.97025	3.99163	2.82897
ENSMUSG00000036792.13	chr2:48839520-49215417	Mbd5	protein_coding	MGI:2138934	overlapping_locus	2	700.79	-0.301742	0.113846	-2.65045	0.00803849	0.0652023	1.59591	1.54668	1.18192	1.15121	1.11563	1.21879
ENSMUSG00000030678.8	chr7:126621302-126626209	Maz	protein_coding	MGI:1338823	NA	2	1738.19	-0.218786	0.0825541	-2.65022	0.00804393	0.0652023	25.6341	23.7439	24.3355	20.7289	19.9696	22.7336
ENSMUSG00000033475.16	chr17:47997571-47999108	Tomm6	protein_coding	MGI:1913369	overlapping_locus	2	778.466	-0.238902	0.0901607	-2.64974	0.00805536	0.0652501	43.7924	36.4051	36.168	32.9379	32.7886	32.6224
ENSMUSG00000005474.10	chr5:136722000-136729948	Myl10	protein_coding	MGI:1891705	NA	2	84.1075	0.996912	0.376343	2.64895	0.00807426	0.0653317	0.495602	2.13664	2.03348	2.65445	4.09317	2.04518
ENSMUSG00000019139.11	chr8:71047023-71049940	Isyna1	protein_coding	MGI:1919030	NA	2	81.4226	0.600596	0.226738	2.64885	0.00807651	0.0653317	0.873309	0.9036	1.78779	1.59965	1.37813	2.28986
ENSMUSG00000032307.17	chr9:55056138-55114813	Ube2q2	protein_coding	MGI:2388672	NA	2	1040.11	-0.292346	0.110404	-2.64798	0.00809748	0.0654565	12.0685	11.9731	8.93754	9.13216	9.85832	7.77891
ENSMUSG00000000563.18	chr3:105850014-105867415	Atp5pb	protein_coding	MGI:1100495	NA	2	14776.9	0.18449	0.069679	2.64772	0.00810374	0.0654622	285.393	319.816	265.265	345.321	364.217	282.232
ENSMUSG00000024112.17	chr17:25593259-25652757	Cacna1h	protein_coding	MGI:1928842	NA	2	66.2012	0.753665	0.284899	2.64538	0.00816001	0.0658717	0.199967	0.287365	0.248629	0.42782	0.487951	0.317239
ENSMUSG00000020928.15	chr11:102726675-102728866	Higd1b	protein_coding	MGI:1922939	NA	2	63.333	1.06967	0.404424	2.64492	0.00817103	0.0659156	0.476527	1.69488	2.26163	2.65863	2.6135	2.89833
ENSMUSG00000028656.15	chr4:122752840-122779849	Cap1	protein_coding	MGI:88262	NA	2	594.642	0.410172	0.15512	2.64421	0.00818809	0.0660081	3.84096	4.64402	5.65939	6.92537	5.02371	6.7503
ENSMUSG00000033124.17	chr1:75157504-75168840	Atg9a	protein_coding	MGI:2138446	overlapping_locus	2	4697.46	-0.265211	0.100317	-2.64374	0.00819958	0.0660556	33.4315	35.2471	36.672	28.3296	33.0322	26.47
ENSMUSG00000026235.15	chr1:77343822-77491725	Epha4	protein_coding	MGI:98277	ncRNA_host	2	98.5821	0.755964	0.286145	2.64189	0.00824455	0.0663725	0.325397	0.335314	0.456865	0.695585	0.565346	0.611029
ENSMUSG00000074247.11	chr8:71921843-71928742	Dda1	protein_coding	MGI:1913748	NA	2	803.423	-0.269323	0.101966	-2.64129	0.00825902	0.0664129	15.2057	13.5396	13.4075	11.2029	12.5141	11.1885
ENSMUSG00000050043.17	chr2:84501660-84509484	Tmx2	protein_coding	MGI:1914208	overlapping_locus	2	1198.91	0.38048	0.144055	2.64122	0.00826081	0.0664129	18.4703	17.2327	15.9257	22.9315	25.0257	19.5249
ENSMUSG00000059920.10	chr16:64572114-64591524	4930453N24Rik	protein_coding	MGI:1914859	NA	2	1292.46	-0.186765	0.0707222	-2.64083	0.00827036	0.0664438	9.84787	8.95929	7.10085	7.79209	7.91617	6.88048
ENSMUSG00000073888.14	chr4:41769467-41774247	Ccl27a	protein_coding	MGI:1343459	NA	2	47.6582	1.82192	0.689965	2.6406	0.00827591	0.0664438	1.14072	1.09598	0.159673	2.24816	1.43	1.9271
ENSMUSG00000052632.17	chr12:21161749-21320172	Asap2	protein_coding	MGI:2685438	overlapping_locus	2	279.242	0.692263	0.262388	2.63832	0.00833174	0.0668465	0.975867	1.77465	1.42884	3.13173	1.77221	1.80863
ENSMUSG00000025220.9	chr19:45738698-45772276	Oga	protein_coding	MGI:1932139	NA	2	1586.88	-0.320163	0.121375	-2.63779	0.00834482	0.0669059	11.318	10.2386	10.3741	8.58705	9.1794	7.85305
ENSMUSG00000014444.18	chr8:123208437-123278068	Piezo1	protein_coding	MGI:3603204	ncRNA_host	2	683.763	0.418641	0.158811	2.63609	0.00838673	0.0671963	1.63105	1.56497	3.52226	2.66716	2.0067	3.99195
ENSMUSG00000034940.16	chr11:83855254-83935404	Synrg	protein_coding	MGI:1354742	NA	1	1890.75	-0.237926	0.0903039	-2.63473	0.00842053	0.0674214	9.59117	9.38459	8.48666	7.7162	8.23823	7.3038
ENSMUSG00000032458.7	chr9:98445784-98470435	Copb2	protein_coding	MGI:1354962	NA	2	1969.34	-0.199953	0.0759215	-2.63369	0.00844636	0.0675824	25.8713	23.3627	26.4091	21.9078	21.9784	21.9763
ENSMUSG00000038155.12	chr19:4090285-4096023	Gstp2	protein_coding	MGI:95864	NA	2	269.871	1.19917	0.455444	2.63297	0.00846429	0.0676799	5.58903	6.29519	6.56787	5.23023	20.8187	15.2581
ENSMUSG00000065954.12	chr8:25644568-25746604	Tacc1	protein_coding	MGI:2443510	ncRNA_host	2	549.233	0.436422	0.165792	2.63234	0.00847984	0.0677583	1.68414	2.16528	2.07373	2.91338	2.22437	2.89777
ENSMUSG00000001056.4	chr11:51510562-51514541	Nhp2	protein_coding	MGI:1098547	NA	2	373.201	-0.30442	0.115656	-2.63211	0.00848561	0.0677585	15.7845	15.4052	13.6396	11.6699	11.6968	12.8234
ENSMUSG00000024712.10	chr19:17371407-17378713	Rfk	protein_coding	MGI:1914688	NA	2	2554.36	-0.210645	0.0800403	-2.63173	0.00849509	0.0677884	40.9162	39.9088	35.0749	34.7771	34.8471	30.4895
ENSMUSG00000097729.3	chr12:80167320-80179618	2310015A10Rik	lncRNA	MGI:1916798	NA	2	410.3	0.510266	0.193943	2.63101	0.00851311	0.0678863	4.28343	6.4049	6.29224	6.35814	8.06054	9.93515
ENSMUSG00000051319.7	chr2:127633308-127634408	Mtln	protein_coding	MGI:1915135	NA	2	1252.55	-0.220786	0.0839545	-2.62983	0.00854276	0.0680768	66.9124	63.6215	55.1893	50.6668	56.4478	51.506
ENSMUSG00000047819.4	chr3:84500881-84504339	Tigd4	protein_coding	MGI:2685264	NA	2	378.217	-0.533705	0.20304	-2.62857	0.00857448	0.0682834	4.04027	5.89835	4.03739	2.95916	3.98284	2.68611
ENSMUSG00000037197.12	chr2:11590248-11608964	Rbm17	protein_coding	MGI:1924188	NA	2	787.37	-0.280292	0.10667	-2.62765	0.00859774	0.0684225	18.0496	20.5184	16.2	14.8585	15.0711	15.1015
ENSMUSG00000030247.10	chr6:142510563-142517340	Kcnj8	protein_coding	MGI:1100508	NA	2	374.926	0.461031	0.175475	2.62733	0.00860582	0.0684406	4.07896	5.25847	5.72341	9.44836	8.46289	4.01236
ENSMUSG00000093661.2	chr6:99602096-99643732	Eif4e3	protein_coding	MGI:1914142	overlapping_locus	2	1149.57	-0.282334	0.107475	-2.62697	0.00861492	0.0684669	19.9603	16.4494	17.4447	14.8469	13.9068	15.4816
ENSMUSG00000023764.19	chr11:3081850-3143463	Sfi1	protein_coding	MGI:1926137	overlapping_locus	1	195.131	0.902428	0.343641	2.62608	0.00863745	0.0685997	1.49324	0.575277	1.03119	2.2345	1.67277	1.87204
ENSMUSG00000001175.17	chr12:100165694-100176073	Calm1	protein_coding	MGI:88251	NA	2	15547.7	-0.428296	0.163137	-2.62537	0.0086554	0.068655	198.306	124.434	159.923	110.011	133.563	113.247
ENSMUSG00000035173.15	chr19:56775913-56810622	Ccdc186	protein_coding	MGI:2445022	NA	2	779.037	-0.287485	0.109504	-2.62535	0.00865604	0.068655	5.91024	4.21857	4.40081	3.29703	3.79025	4.78774
ENSMUSG00000027774.17	chr3:67337429-67383862	Gfm1	protein_coding	MGI:107339	NA	1	3847.67	0.249228	0.0949676	2.62435	0.00868147	0.0688104	31.158	32.287	27.7106	38.7277	36.2793	33.309
ENSMUSG00000019777.17	chr10:36850540-36877885	Hdac2	protein_coding	MGI:1097691	NA	2	1314.38	-0.181624	0.0692182	-2.62394	0.0086919	0.0688468	12.6488	12.6435	11.4038	10.9323	11.3476	10.0596
ENSMUSG00000029174.19	chr5:64313648-64508829	Tbc1d1	protein_coding	MGI:1889508	overlapping_locus	2	3973.87	-0.595927	0.227168	-2.62329	0.00870856	0.0689282	31.0823	33.8602	12.1736	27.2643	17.1018	7.70354
ENSMUSG00000063450.15	chr12:75864908-76157700	Syne2	protein_coding	MGI:2449316	ncRNA_host	2	793.324	0.319011	0.121622	2.62297	0.00871664	0.0689282	1.00975	0.853538	1.32449	1.26851	1.2985	1.35791
ENSMUSG00000036241.4	chr4:41135743-41193380	Ube2r2	protein_coding	MGI:1914865	overlapping_locus	2	4853.86	-0.248903	0.0948979	-2.62285	0.00871969	0.0689282	48.7426	57.9542	55.2193	49.5978	51.789	36.15
ENSMUSG00000032649.15	chr1:152275581-152386446	Colgalt2	protein_coding	MGI:2138232	NA	2	106.654	0.671697	0.256305	2.62069	0.00877517	0.0693203	0.724992	0.778833	0.975303	1.53355	1.28834	1.14928
ENSMUSG00000034684.13	chr9:107558699-107587674	Sema3f	protein_coding	MGI:1096347	NA	2	372.809	0.510359	0.194765	2.62038	0.00878328	0.0693379	1.08235	1.36752	2.33629	1.93931	1.44928	3.45859
ENSMUSG00000036046.15	chr15:84828137-84872752	5031439G07Rik	protein_coding	MGI:2444899	ncRNA_host	2	5186.06	-0.157916	0.0603	-2.61884	0.00882284	0.0696037	31.0977	25.7714	28.196	23.1675	21.9778	31.9859
ENSMUSG00000025616.15	chr16:87251591-87280405	Usp16	protein_coding	MGI:1921362	NA	2	1520.08	-0.257515	0.0983403	-2.61861	0.00882881	0.0696043	20.6368	19.866	16.0276	15.7027	17.1751	14.2098
ENSMUSG00000020519.6	chr11:57692463-57701043	Sap30l	protein_coding	MGI:1354709	NA	2	672.103	-0.278331	0.106313	-2.61803	0.00884379	0.069673	24.7221	24.0753	19.9983	18.1415	20.9972	17.3326
ENSMUSG00000021182.17	chr12:100877782-100995315	Ccdc88c	protein_coding	MGI:1915589	ncRNA_host	2	1814.91	-0.613691	0.234428	-2.61782	0.00884933	0.069673	10.0086	7.06759	8.40511	4.8848	5.73815	5.91239
ENSMUSG00000029632.8	chr6:11900291-11907496	Ndufa4	protein_coding	MGI:107686	NA	2	9424.41	0.190325	0.0727324	2.61679	0.00887615	0.0698375	531.367	549.142	460.035	614.865	634.668	510.986
ENSMUSG00000028936.16	chr4:152410199-152418528	Rpl22	protein_coding	MGI:99262	NA	2	2141.44	-0.218741	0.0836039	-2.61639	0.00888641	0.0698717	26.8987	26.4508	28.2539	22.4054	23.7973	23.9544
ENSMUSG00000004665.11	chr10:79824418-79831896	Cnn2	protein_coding	MGI:105093	NA	2	258.814	0.551463	0.210791	2.61616	0.00889247	0.0698728	1.94836	2.88244	2.8636	4.24408	3.31358	3.63799
ENSMUSG00000028821.9	chr4:134658209-134664859	Syf2	protein_coding	MGI:1915842	NA	2	845.129	-0.218478	0.0835481	-2.61499	0.00892288	0.0700651	24.2127	25.1034	21.8015	20.0976	20.8685	20.0656
ENSMUSG00000033099.11	chr15:78819133-78827838	Nol12	protein_coding	MGI:2146285	NA	2	519.504	-0.324334	0.124076	-2.614	0.00894897	0.0702232	5.42938	5.11432	4.06856	3.79013	3.77292	4.00567
ENSMUSG00000051890.14	chr12:69287950-69331406	Klhdc1	protein_coding	MGI:2672853	NA	1	710.045	-0.377661	0.144497	-2.61363	0.00895855	0.0702517	9.19947	9.18019	9.65215	7.6874	7.57126	6.30009
ENSMUSG00000019055.16	chr4:147994210-148021224	Plod1	protein_coding	MGI:99907	NA	1	1088.95	0.366423	0.140256	2.61253	0.00898756	0.0704324	7.01568	7.66078	8.82649	9.19693	7.85429	13.9361
ENSMUSG00000031278.13	chrX:141100989-141173531	Acsl4	protein_coding	MGI:1354713	NA	1	686.91	-0.296081	0.113411	-2.61069	0.00903602	0.0707486	5.56329	5.03028	5.07038	4.0905	3.73899	5.01906
ENSMUSG00000025239.4	chr9:123307771-123350617	Limd1	protein_coding	MGI:1352502	NA	2	2121.23	-0.252556	0.0967446	-2.61054	0.0090399	0.0707486	20.4084	15.2856	16.7635	14.1393	15.2357	14.421
ENSMUSG00000023909.5	chr17:23955160-23959841	Paqr4	protein_coding	MGI:1923748	NA	2	111.544	0.623784	0.239012	2.60985	0.00905827	0.0708454	0.877764	1.54659	1.36722	1.74983	2.098	1.93922
ENSMUSG00000038740.10	chr2:33619965-33777958	Mvb12b	protein_coding	MGI:1919793	NA	2	1498.11	-0.23256	0.0891199	-2.60952	0.0090669	0.0708617	10.3138	9.71802	10.1416	8.82279	8.69008	8.18611
ENSMUSG00000031207.17	chrX:95139648-95212158	Msn	protein_coding	MGI:97167	NA	2	1192.16	0.466478	0.178774	2.60932	0.00907236	0.0708617	3.50064	5.19795	6.00159	7.55829	4.94348	7.55375
ENSMUSG00000027309.19	chr2:130548120-130748326	Dnaaf9	protein_coding	MGI:1923029	overlapping_locus	1	182.746	0.489743	0.187724	2.60885	0.00908466	0.0709108	0.450707	0.555166	0.860889	0.849076	0.756108	0.925328
ENSMUSG00000032666.17	chr1:151728154-151965876	1700025G04Rik	protein_coding	MGI:1916649	ncRNA_host	2	2708.56	-0.507673	0.194616	-2.60858	0.00909183	0.0709199	8.69228	14.2822	7.79822	7.40084	6.78486	7.2899
ENSMUSG00000029394.12	chr5:124483480-124501145	Cdk2ap1	protein_coding	MGI:1202069	NA	2	607.32	-0.255425	0.0979641	-2.60733	0.00912514	0.0711327	10.61	10.4044	11.9691	8.61022	8.4094	10.7669
ENSMUSG00000035891.17	chr15:86023330-86070342	Cerk	protein_coding	MGI:2386052	NA	2	258.803	0.476255	0.182731	2.60631	0.00915227	0.0712971	1.33817	1.51618	1.49675	1.82188	2.14074	2.07072
ENSMUSG00000042628.9	chr12:83593332-83643996	Zfyve1	protein_coding	MGI:3026685	NA	2	763.296	-0.300291	0.115238	-2.60585	0.00916471	0.0713469	7.41722	7.17373	6.10742	5.24253	5.86651	5.63346
ENSMUSG00000018428.16	chr11:88721618-88755412	Akap1	protein_coding	MGI:104729	NA	2	3378.98	0.407368	0.156385	2.60491	0.00918994	0.0714961	24.169	31.1596	24.326	42.3727	40.5884	24.9075
ENSMUSG00000042650.4	chr11:60427207-60449338	Alkbh5	protein_coding	MGI:2144489	NA	2	6549.49	-0.173507	0.0666294	-2.60407	0.00921252	0.0716246	43.5928	42.2739	40.5471	39.2811	37.3221	35.5382
ENSMUSG00000052496.6	chr15:85698871-85705935	Pkdrej	protein_coding	MGI:1338786	NA	2	51.6366	0.88352	0.339347	2.60358	0.00922546	0.071678	0.178529	0.209351	0.161809	0.394072	0.368617	0.259504
ENSMUSG00000017802.15	chr11:100987148-101010719	Retreg3	protein_coding	MGI:1915248	NA	2	1171.73	-0.198749	0.0763531	-2.60303	0.00924048	0.0717474	13.3687	12.7269	12.9389	11.4877	11.494	11.0479
ENSMUSG00000020580.11	chr12:16944896-17037824	Rock2	protein_coding	MGI:107926	ncRNA_host	2	5334.08	-0.3248	0.124793	-2.60271	0.00924895	0.0717542	22.4478	19.312	19.2469	13.9523	13.7677	22.1761
ENSMUSG00000020780.16	chr11:116135992-116165043	Srp68	protein_coding	MGI:1917447	NA	2	2797.16	-0.256946	0.098729	-2.60254	0.0092535	0.0717542	37.678	42.135	37.8166	32.147	34.8538	31.381
ENSMUSG00000061306.17	chr11:119994786-120042172	Slc38a10	protein_coding	MGI:1919305	NA	2	2578.87	0.722697	0.277822	2.60129	0.00928728	0.0719251	10.3246	9.57977	10.2781	22.2218	13.2506	14.8137
ENSMUSG00000055003.15	chr6:119292094-119307727	Lrtm2	protein_coding	MGI:2141485	NA	2	141.618	2.27859	0.875951	2.60128	0.00928774	0.0719251	2.36149	0.678723	0	3.26385	1.47927	0.484829
ENSMUSG00000024747.4	chr19:20670317-20704926	Aldh1a7	protein_coding	MGI:1347050	NA	2	55.8553	-1.03657	0.398833	-2.59901	0.00934936	0.0723549	0.952392	1.41076	1.46558	0.634159	0.819353	0.406104
ENSMUSG00000059689.16	chr6:117818141-117822917	Zfp637	protein_coding	MGI:2448537	NA	2	489.78	-0.290124	0.111697	-2.59743	0.00939248	0.0726409	14.6147	13.6565	13.061	12.4843	11.4061	10.0997
ENSMUSG00000032018.15	chr9:42162891-42175552	Sc5d	protein_coding	MGI:1353611	NA	2	597.539	-0.302153	0.116516	-2.59323	0.00950786	0.0734851	5.9929	4.80076	4.90817	4.55202	4.32976	3.83163
ENSMUSG00000030796.18	chr7:44865177-44883068	Tead2	protein_coding	MGI:104904	NA	2	59.1012	0.900942	0.347581	2.59203	0.00954112	0.0736939	0.320248	0.253119	0.457608	0.628058	0.468371	0.838296
ENSMUSG00000029486.14	chr5:96357352-96414586	Mrpl1	protein_coding	MGI:2137202	NA	2	756.788	0.210675	0.0813467	2.58985	0.0096019	0.0741148	6.43722	6.29993	5.1003	7.06372	7.3793	6.12808
ENSMUSG00000031502.12	chr8:11248423-11362826	Col4a1	protein_coding	MGI:88454	NA	2	3698.4	0.624978	0.241376	2.58923	0.00961899	0.0741642	13.6985	19.6017	15.022	36.2472	19.1187	19.4792
ENSMUSG00000026399.13	chr1:130366764-130390481	Cd55	protein_coding	MGI:104850	NA	2	1546.44	-0.365018	0.140979	-2.58917	0.00962086	0.0741642	13.0166	16.869	19.6228	11.5641	11.6973	15.2099
ENSMUSG00000022663.4	chr16:44979148-45008901	Atg3	protein_coding	MGI:1915091	NA	2	810.395	-0.21523	0.0831601	-2.58814	0.00964955	0.074276	15.3785	15.7766	15.2156	13.5348	13.1543	13.309
ENSMUSG00000026198.16	chr1:75148361-75157036	Abcb6	protein_coding	MGI:1921354	overlapping_locus	2	792.402	-0.360356	0.13925	-2.58783	0.0096583	0.074276	11.9072	10.3108	10.8962	9.1245	9.99215	7.04048
ENSMUSG00000083844.9	chr11:5712129-5734710	Ube2d-ps	transcribed_unprocessed_pseudogene	MGI:1913774	NA	2	1396.83	-0.215418	0.0832451	-2.58775	0.00966046	0.074276	18.265	16.8847	15.7273	14.9939	16.2117	12.7223
ENSMUSG00000117284.2	chr17:22504852-22533818	Gm7072	protein_coding	MGI:3648314	NA	2	402.61	-0.382661	0.147874	-2.58775	0.00966054	0.074276	5.41702	4.48292	4.5269	3.97172	3.64329	3.44378
ENSMUSG00000079104.5	chr12:57277198-57286668	Prps1l3	protein_coding	MGI:3779453	overlapping_locus	2	420.906	-0.307952	0.119064	-2.58643	0.00969749	0.0745115	10.8825	9.15563	10.4187	8.54564	7.23748	8.88875
ENSMUSG00000020439.18	chr11:3467523-3490612	Smtn	protein_coding	MGI:1354727	NA	2	2388.76	0.267483	0.103445	2.58576	0.00971648	0.0746089	18.983	15.9507	19.1447	20.8641	20.1089	24.1785
ENSMUSG00000021067.9	chr12:70011786-70033776	Sav1	protein_coding	MGI:1927144	NA	2	1076.29	-0.311343	0.120425	-2.58536	0.00972772	0.0746466	17.0906	16.2012	20.5407	12.8798	14.0842	16.4606
ENSMUSG00000026888.15	chr2:64742820-64855331	Grb14	protein_coding	MGI:1355324	NA	2	864.956	0.495358	0.191639	2.58485	0.0097422	0.0747092	3.5601	3.9294	3.77985	7.12298	5.01283	4.10002
ENSMUSG00000050332.8	chrX:94463924-94488478	Amer1	protein_coding	MGI:1919595	NA	2	315.352	-0.381326	0.14756	-2.58421	0.00976017	0.0747984	2.41098	2.03275	1.23281	1.48428	1.79014	1.0168
ENSMUSG00000042719.18	chr5:121535999-121582441	Naa25	protein_coding	MGI:2442563	NA	2	1290.51	-0.264671	0.102445	-2.58355	0.00977892	0.0748935	9.18819	9.44681	7.94685	7.02524	7.55704	7.47225
ENSMUSG00000037204.8	chr15:101182153-101188826	Atg101	protein_coding	MGI:1915368	NA	2	606.12	-0.392418	0.151936	-2.58279	0.00980062	0.075011	16.3014	18.3324	13.2912	13.998	10.9585	11.3635
ENSMUSG00000022973.19	chr16:90732980-90808196	Synj1	protein_coding	MGI:1354961	NA	2	379.243	0.362015	0.140227	2.58164	0.00983331	0.0752124	1.42236	1.84557	1.51799	2.32535	1.92817	1.8967
ENSMUSG00000005610.18	chr7:110666957-110682237	Eif4g2	protein_coding	MGI:109207	ncRNA_host	2	25229.3	-0.14473	0.0560702	-2.58123	0.00984503	0.0752383	107.399	109.106	98.8845	97.1703	99.1987	88.9372
ENSMUSG00000030199.17	chr6:134012663-134247121	Etv6	protein_coding	MGI:109336	NA	2	235.461	0.434042	0.168168	2.581	0.0098516	0.0752383	1.34923	0.915671	1.1461	1.51876	1.32551	1.75853
ENSMUSG00000058672.8	chr13:34258257-34261990	Tubb2a	protein_coding	MGI:107861	NA	2	311.913	0.682476	0.264439	2.58085	0.00985582	0.0752383	2.13091	3.67469	3.79972	4.95892	3.41306	6.96763
ENSMUSG00000022620.15	chr15:89356679-89361628	Arsa	protein_coding	MGI:88077	NA	2	116.966	0.549464	0.213103	2.5784	0.00992588	0.0757241	0.728149	1.00213	1.04618	1.43181	1.1059	1.49206
ENSMUSG00000030967.16	chr7:132532871-132588120	Zranb1	protein_coding	MGI:106441	NA	2	2406.59	-0.314286	0.121906	-2.57809	0.00993475	0.0757429	21.7495	20.924	14.8427	16.2393	16.7912	12.9036
ENSMUSG00000038072.15	chr5:25426902-25470916	Galnt11	protein_coding	MGI:2444392	NA	2	264.604	0.359074	0.139401	2.57584	0.00999982	0.0761453	1.11167	1.32036	1.35706	1.64297	1.67969	1.53717
ENSMUSG00000029617.11	chr5:143924727-143951671	Ccz1	protein_coding	MGI:2141070	NA	2	1007.09	-0.249371	0.0968125	-2.57581	0.0100004	0.0761453	20.5635	20.7086	20.8744	16.9248	19.3641	16.1018
ENSMUSG00000036391.17	chr11:51583091-51647445	Sec24a	protein_coding	MGI:1924621	ncRNA_host	2	899.337	-0.321035	0.124649	-2.57551	0.0100093	0.0761474	4.20561	4.41765	4.39539	3.52893	3.2505	3.64683
ENSMUSG00000021245.16	chr12:85281294-85317373	Mlh3	protein_coding	MGI:1353455	ncRNA_host	2	535.422	-0.274249	0.10649	-2.57536	0.0100137	0.0761474	4.50159	4.0223	3.87946	3.2333	3.63541	3.34278
ENSMUSG00000042272.18	chr2:77010684-77110936	Sestd1	protein_coding	MGI:1916262	overlapping_locus	2	296.892	-0.312113	0.121202	-2.57514	0.0100201	0.0761474	1.21819	1.44315	1.08767	1.09657	1.16251	0.781827
ENSMUSG00000066235.8	chr9:121810672-121826176	Pomgnt2	protein_coding	MGI:2143424	NA	2	413.063	-0.331704	0.12883	-2.57474	0.0100315	0.0761566	6.20444	5.79925	5.51309	4.6401	5.42745	3.91776
ENSMUSG00000026643.17	chr2:3285249-3329914	Nmt2	protein_coding	MGI:1202298	NA	2	341.288	-0.424323	0.164808	-2.57465	0.0100342	0.0761566	2.83968	1.8911	2.00763	1.49882	1.55319	1.91016
ENSMUSG00000024858.15	chr19:4336029-4356250	Grk2	protein_coding	MGI:87940	NA	1	2089.67	-0.199387	0.077451	-2.57437	0.0100424	0.0761696	22.8381	24.2838	18.8866	19.6197	21.2793	16.5308
ENSMUSG00000031913.10	chr8:107757854-107772387	Vps4a	protein_coding	MGI:1890520	NA	2	1728.5	-0.219647	0.0853387	-2.57383	0.0100581	0.0762401	32.6851	31.1784	28.9958	26.4305	30.0485	23.4129
ENSMUSG00000034371.10	chr19:10565155-10583018	Tkfc	protein_coding	MGI:2385084	NA	2	80.4007	0.614213	0.23866	2.57359	0.0100648	0.0762421	0.393391	0.499372	0.649119	0.753768	0.699439	0.868228
ENSMUSG00000052605.13	chr7:4847958-4873257	Isoc2b	protein_coding	MGI:1914691	NA	2	82.2845	0.748852	0.291057	2.57287	0.0100858	0.0763295	2.18219	1.65578	2.72618	3.54177	3.96499	3.49454
ENSMUSG00000069516.9	chr10:117113236-117118226	Lyz2	protein_coding	MGI:96897	NA	2	476.547	0.777473	0.302195	2.57275	0.0100893	0.0763295	5.67397	6.34678	15.9884	13.9691	8.76669	25.5491
ENSMUSG00000045237.6	chrX:69429483-69433023	Eola1	protein_coding	MGI:1915868	NA	2	262.797	-0.445204	0.173066	-2.57246	0.0100978	0.0763451	10.7453	8.98668	9.99766	6.81134	6.87968	8.20889
ENSMUSG00000024513.17	chr18:70701260-70759202	Mbd2	protein_coding	MGI:1333813	NA	2	1242.48	-0.254778	0.0990522	-2.57216	0.0101065	0.0763617	19.8829	17.651	17.7359	14.4008	16.8929	14.9273
ENSMUSG00000099906.3	chr1:20740106-20754522	Lincmd1	lncRNA	NA	ncRNA_host	2	70.1501	2.10641	0.819323	2.57091	0.0101431	0.0765832	0	0.101878	1.68092	0.479425	0.117289	1.81935
ENSMUSG00000020593.17	chr12:16585670-16696967	Lpin1	protein_coding	MGI:1891340	NA	2	11078	0.291378	0.113345	2.57072	0.0101488	0.0765832	56.9089	50.4779	48.2313	58.5863	69.2497	62.3093
ENSMUSG00000102098.2	chr12:30460558-30517357	2310016D03Rik	lncRNA	MGI:1916816	ncRNA_host	2	48.0008	0.971248	0.37812	2.56862	0.0102103	0.0769983	0.815325	1.20917	0.439385	1.79969	1.54876	1.32574
ENSMUSG00000021662.12	chr13:98035977-98342947	Arhgef28	protein_coding	MGI:1346016	NA	2	147.758	0.47938	0.186666	2.56811	0.0102254	0.0770625	0.598841	0.719192	0.541359	0.896729	0.886861	0.803537
ENSMUSG00000029869.8	chr6:41582416-41597443	Ephb6	protein_coding	MGI:1096338	NA	2	61.3455	1.02136	0.397806	2.56747	0.0102444	0.0771567	0.294183	0.726377	0.384878	1.45411	1.04917	0.477689
ENSMUSG00000038039.14	chr10:58091319-58141421	Gcc2	protein_coding	MGI:1917547	NA	2	713.043	-0.375662	0.146423	-2.56559	0.0102999	0.0775254	4.20066	3.94775	4.52335	3.05418	3.14349	3.64589
ENSMUSG00000048076.15	chr11:59102238-59119096	Arf1	protein_coding	MGI:99431	NA	2	5252.55	-0.166021	0.0647289	-2.56486	0.0103217	0.0776401	98.1514	98.0615	90.3238	86.0408	88.7749	80.5051
ENSMUSG00000026107.12	chr1:51505021-51517584	Nabp1	protein_coding	MGI:1923258	NA	2	500.198	0.51057	0.1991	2.56439	0.0103358	0.0776959	2.40364	1.658	3.78788	3.44604	3.20107	4.04161
ENSMUSG00000060904.15	chr10:88566720-88579956	Arl1	protein_coding	MGI:99436	NA	1	2329.24	-0.236467	0.092231	-2.56386	0.0103516	0.0777559	40.2937	36.3036	38.3307	32.82	36.5633	28.556
ENSMUSG00000029415.5	chr5:92431869-92458338	Sdad1	protein_coding	MGI:2140779	NA	2	611.664	-0.259434	0.101196	-2.56368	0.0103569	0.0777559	4.89949	4.72056	4.25109	3.82818	4.1425	3.59051
ENSMUSG00000046909.10	chr11:80027504-80033001	Tefm	protein_coding	MGI:1915800	NA	2	302.393	0.332878	0.129867	2.56321	0.0103708	0.0778108	6.13783	6.59456	6.29742	8.44936	8.80811	6.88785
ENSMUSG00000022969.14	chr16:91203052-91222722	Il10rb	protein_coding	MGI:109380	overlapping_locus	2	109.438	0.605509	0.236321	2.56223	0.0104002	0.0779236	0.966325	1.09632	1.62997	1.95359	1.64518	1.9526
ENSMUSG00000024096.18	chr17:66155413-66192793	Ralbp1	protein_coding	MGI:108466	NA	2	1121.94	-0.25437	0.0992814	-2.56211	0.0104038	0.0779236	9.3953	9.99	8.04347	7.69282	8.3511	6.90904
ENSMUSG00000029063.17	chr4:155646835-155675458	Nadk	protein_coding	MGI:2183149	NA	2	679.068	0.285074	0.111269	2.56202	0.0104065	0.0779236	4.80691	5.00382	5.58236	5.70381	6.22748	6.75893
ENSMUSG00000020668.11	chr12:3415132-3456494	Kif3c	protein_coding	MGI:107979	NA	2	1599.32	-0.253259	0.09886	-2.56179	0.0104134	0.0779236	12.778	8.80425	7.01719	6.83739	7.46195	9.06707
ENSMUSG00000000711.4	chr10:128513044-128532133	Rab5b	protein_coding	MGI:105938	NA	2	3467.25	-0.199792	0.0779951	-2.5616	0.0104191	0.0779236	42.9797	41.8193	41.1471	37.6597	39.703	32.6771
ENSMUSG00000021091.9	chr12:104372988-104380588	Serpina3n	protein_coding	MGI:105045	NA	2	133.137	-1.64921	0.643874	-2.56139	0.0104255	0.0779236	3.66659	1.77043	3.7124	0.138857	0.630882	4.24564
ENSMUSG00000026249.11	chr1:79771914-79838897	Serpine2	protein_coding	MGI:101780	NA	2	2092.22	-0.303944	0.118717	-2.56024	0.0104599	0.0780841	39.4854	39.5728	29.9087	31.4415	29.0477	27.4352
ENSMUSG00000015671.12	chr13:14787825-14848821	Psma2	protein_coding	MGI:104885	overlapping_locus	2	1676.95	-0.233232	0.0910977	-2.56023	0.0104602	0.0780841	18.5299	20.3593	15.6881	15.093	16.0809	15.0169
ENSMUSG00000008682.14	chrX:73314418-73316741	Rpl10	protein_coding	MGI:105943	ncRNA_host	2	5724.8	-0.287063	0.112143	-2.5598	0.0104731	0.0781315	147.537	189.099	213.347	139.349	155.542	151.029
ENSMUSG00000028284.14	chr4:31964097-32023467	Map3k7	protein_coding	MGI:1346877	NA	2	2067.02	-0.207699	0.0811691	-2.55885	0.010502	0.0782785	14.3903	14.7445	9.86598	11.6971	12.2774	9.48248
ENSMUSG00000030315.16	chr6:114837589-114946955	Vgll4	protein_coding	MGI:2652840	NA	2	493.695	-0.616752	0.24104	-2.55871	0.0105061	0.0782785	4.39459	4.747	4.83673	3.17993	3.11909	2.8646
ENSMUSG00000021754.18	chr13:111882962-111945527	Map3k1	protein_coding	MGI:1346872	NA	2	309.978	0.48725	0.190582	2.55665	0.0105686	0.0786814	1.77111	1.53311	1.07611	2.45184	2.40925	1.31759
ENSMUSG00000030029.15	chr6:94581510-94677139	Lrig1	protein_coding	MGI:107935	ncRNA_host	1	2545.47	-0.366464	0.143363	-2.55619	0.0105824	0.0786814	18.8891	18.6314	15.1137	11.7587	11.9279	17.8657
ENSMUSG00000029781.8	chr6:56809044-56856343	Fkbp9	protein_coding	MGI:1350921	NA	2	1864.69	-0.521194	0.203918	-2.5559	0.0105912	0.0786814	25.1675	26.7459	29.4181	21.4307	22.9443	13.4253
ENSMUSG00000063894.16	chr13:21697392-21715290	Zkscan8	protein_coding	MGI:1913815	NA	2	250.514	-0.438047	0.171391	-2.55583	0.0105935	0.0786814	1.51323	1.04088	1.38136	0.924458	0.801587	1.19732
ENSMUSG00000063108.16	chr9:20339745-20371456	Zfp26	protein_coding	MGI:99173	NA	2	185.365	-0.409231	0.160117	-2.55583	0.0105935	0.0786814	0.754007	0.787003	0.580563	0.565371	0.546257	0.480701
ENSMUSG00000045948.9	chr7:28439066-28441245	Mrps12	protein_coding	MGI:1346333	NA	1	559.466	0.260203	0.101843	2.55494	0.0106206	0.0788327	16.397	19.0739	18.033	24.1327	21.5604	18.7044
ENSMUSG00000028444.18	chr4:41657498-41697089	Cntfr	protein_coding	MGI:99605	NA	2	970.563	1.55263	0.608307	2.55237	0.0106992	0.0793234	2.17623	7.1148	9.56222	10.4344	16.4944	22.1945
ENSMUSG00000034220.8	chr1:92759367-92788501	Gpc1	protein_coding	MGI:1194891	ncRNA_host	2	9741.32	-0.277394	0.108682	-2.55234	0.0107001	0.0793234	107.491	86.499	65.3858	70.5011	64.366	75.207
ENSMUSG00000024217.11	chr17:28057124-28070942	Snrpc	protein_coding	MGI:109489	NA	2	712.984	-0.251513	0.098598	-2.55089	0.0107447	0.0796041	19.901	19.6023	17.9151	16.2331	15.0654	16.9669
ENSMUSG00000021388.15	chr13:49697919-49721041	Aspn	protein_coding	MGI:1913945	NA	2	276.672	0.402743	0.157923	2.55025	0.0107647	0.0797022	2.78624	3.17856	4.81695	4.46998	3.69511	6.04593
ENSMUSG00000044475.15	chr10:59838627-59935810	Ascc1	protein_coding	MGI:1916340	NA	2	260.971	-0.379522	0.148832	-2.55	0.0107721	0.0797071	4.83128	3.9475	5.31148	3.21121	3.36075	4.30763
ENSMUSG00000035297.15	chr5:100666175-100695669	Cops4	protein_coding	MGI:1349414	NA	2	2062.89	-0.176615	0.0692746	-2.5495	0.0107878	0.0797618	38.286	40.568	36.7433	33.2152	35.7725	33.2004
ENSMUSG00000005893.15	chr6:92068371-92151275	Nr2c2	protein_coding	MGI:1352466	overlapping_locus	2	1007.83	-0.241177	0.0946041	-2.54933	0.010793	0.0797618	4.02829	4.34168	3.51594	3.44129	3.47068	3.12873
ENSMUSG00000042451.13	chr1:134121186-134128970	Mybph	protein_coding	MGI:1858196	NA	2	2259.69	-0.535287	0.210072	-2.54811	0.0108308	0.0799819	5.7406	42.1757	102.374	29.4107	18.5397	14.5032
ENSMUSG00000018822.8	chr19:42186410-42190691	Sfrp5	protein_coding	MGI:1860298	NA	2	157.795	0.622298	0.244237	2.54793	0.0108364	0.0799819	1.14182	0.778455	4.95974	1.44378	1.74076	7.11442
ENSMUSG00000029153.12	chr5:73479542-73498371	Ociad2	protein_coding	MGI:1916377	NA	2	1401.34	-0.579028	0.22735	-2.54686	0.0108697	0.0801564	17.1449	15.3104	28.6493	10.5742	10.7539	20.2521
ENSMUSG00000078670.4	chr7:73390050-73426667	Fam174b	protein_coding	MGI:3698178	overlapping_locus	2	44.8899	-0.816219	0.320496	-2.54673	0.0108736	0.0801564	0.725799	0.4493	1.19666	0.317153	0.220946	1.04308
ENSMUSG00000072949.7	chr12:84056264-84065145	Acot1	protein_coding	MGI:1349396	NA	2	37.3549	2.2443	0.881363	2.5464	0.0108841	0.0801839	0.0629605	0.0904782	1.40089	0.221405	1.4408	0.827274
ENSMUSG00000026941.17	chr2:25453127-25464857	Mamdc4	protein_coding	MGI:2685841	overlapping_locus	2	56.3217	1.0158	0.39901	2.5458	0.0109029	0.080272	0.337802	0.347639	0.326985	0.601321	0.573729	0.86579
ENSMUSG00000054150.13	chr12:104896192-104976068	Syne3	protein_coding	MGI:2442408	NA	2	106.271	0.589362	0.231593	2.54481	0.0109337	0.0804483	0.33647	0.493983	0.55133	0.664178	0.549208	0.862558
ENSMUSG00000021768.16	chr14:21783462-21801249	Dusp13	protein_coding	MGI:1351599	NA	1	4613.85	-0.333647	0.131145	-2.54411	0.0109556	0.0805598	76.8736	76.3661	64.6197	49.597	57.4574	65.569
ENSMUSG00000033813.16	chr1:4928037-4968132	Tcea1	protein_coding	MGI:1196624	overlapping_locus	2	806.602	-0.238628	0.0938055	-2.54386	0.0109634	0.0805664	10.4684	11.0305	9.85173	9.29595	8.77013	8.52823
ENSMUSG00000012819.17	chr10:60138527-60532269	Cdh23	protein_coding	MGI:1890219	NA	1	220.586	0.576493	0.22673	2.54264	0.0110019	0.0807816	0.466838	0.469613	0.39983	0.763184	0.522113	0.700082
ENSMUSG00000045036.16	chr17:65562994-65847777	Tmem232	protein_coding	MGI:2685786	NA	2	157.799	-3.74326	1.47228	-2.5425	0.0110063	0.0807816	4.78122	2.24866	4.31805	2.65201	0.0166195	0.0594917
ENSMUSG00000061751.17	chr16:33789443-34393902	Kalrn	protein_coding	MGI:2685385	NA	2	450.331	-0.363964	0.143167	-2.54224	0.0110146	0.0807918	0.92349	0.878502	0.666682	0.672031	0.58596	0.647594
ENSMUSG00000087516.8	chr5:119708195-119809430	Tbx3os1	lncRNA	MGI:3780472	NA	2	39.6801	1.11974	0.440501	2.54197	0.0110228	0.080802	0.302682	0.192304	0.439013	0.749823	0.912773	0.431726
ENSMUSG00000025059.17	chrX:84745543-84820425	Gk	protein_coding	MGI:106594	NA	2	61.1571	0.92176	0.362725	2.54121	0.0110469	0.0809281	0.181752	0.350301	0.523784	0.728799	0.706395	0.507043
ENSMUSG00000034620.18	chr10:121914019-121933276	Rxylt1	protein_coding	MGI:2384919	NA	1	682.404	-0.272656	0.10734	-2.54012	0.0110816	0.0811041	5.3956	5.28237	5.26593	4.28113	4.84686	4.08777
ENSMUSG00000074623.5	chr2:160153313-160176082	Gm826	protein_coding	MGI:2685672	NA	1	39.8285	1.3419	0.528302	2.54002	0.0110846	0.0811041	0.202756	0.670157	0.765693	1.34374	0.85472	1.89402
ENSMUSG00000060260.14	chr7:138828398-138847891	Pwwp2b	protein_coding	MGI:2142008	NA	2	184.078	0.525875	0.207104	2.53919	0.0111111	0.0812472	1.27556	1.21629	1.38769	2.119	1.38657	2.10737
ENSMUSG00000002379.8	chr17:57024767-57029141	Ndufa11	protein_coding	MGI:1917125	NA	2	2829.69	0.237313	0.0934835	2.53856	0.0111311	0.0813432	77.4804	100.23	84.2021	103.37	117.097	88.1297
ENSMUSG00000052712.18	chr17:29487762-29533039	BC004004	protein_coding	MGI:2136782	overlapping_locus	2	1752.89	-0.173797	0.0684801	-2.53792	0.0111514	0.0813883	4.24345	4.50819	3.73618	3.97147	4.14354	3.02001
ENSMUSG00000027438.15	chr2:148535905-148574387	Napb	protein_coding	MGI:104562	NA	2	189.89	-1.06999	0.421634	-2.53772	0.0111578	0.0813883	1.61237	3.16503	2.20591	1.04863	1.41665	1.14099
ENSMUSG00000029545.14	chr5:115248358-115257405	Acads	protein_coding	MGI:87868	NA	2	2607.53	0.291355	0.114816	2.53758	0.0111623	0.0813883	40.6856	44.1067	49.7652	55.1744	66.7504	44.3684
ENSMUSG00000027378.17	chr2:127582652-127630817	Nphp1	protein_coding	MGI:1858233	NA	2	709.053	-0.381397	0.150304	-2.5375	0.0111649	0.0813883	12.1882	13.0649	11.1325	8.66294	11.4914	7.83884
ENSMUSG00000042613.10	chr3:89344013-89358259	Pbxip1	protein_coding	MGI:2441670	NA	2	10207.2	-0.154073	0.060745	-2.53639	0.0112003	0.0815552	89.1065	81.3916	85.0949	78.3469	74.0331	77.274
ENSMUSG00000024011.18	chr17:29536654-29549567	Pi16	protein_coding	MGI:1921366	NA	2	558.905	0.719738	0.28377	2.53635	0.0112016	0.0815552	1.49357	2.06203	4.20849	3.56402	2.84062	5.85898
ENSMUSG00000039158.12	chr4:63285362-63321591	Akna	protein_coding	MGI:2140340	NA	2	74.4989	0.751562	0.296355	2.53602	0.011212	0.0815805	0.376314	0.392385	0.391234	0.781218	0.618884	0.56058
ENSMUSG00000022095.10	chr14:70820736-70837275	Fhip2b	protein_coding	MGI:3036290	NA	2	1555.25	-0.179472	0.0707862	-2.53541	0.0112316	0.0816728	16.7757	16.8809	12.8321	15.096	14.5163	11.4497
ENSMUSG00000002981.11	chr7:19365496-19398958	Clptm1	protein_coding	MGI:1927155	NA	2	1763.42	-0.218959	0.0863695	-2.53514	0.0112403	0.0816857	14.4116	15.6831	15.8719	13.1572	14.1703	12.1835
ENSMUSG00000021809.11	chr14:20344765-20367646	Nudt13	protein_coding	MGI:1914975	NA	2	574.903	0.385422	0.152051	2.53483	0.0112503	0.0817081	5.72396	8.41923	6.82615	8.98817	10.5196	7.77135
ENSMUSG00000033170.15	chr15:78659338-78687242	Card10	protein_coding	MGI:2146012	NA	2	357.856	0.508129	0.20054	2.5338	0.0112833	0.0818976	2.76102	1.8975	2.82014	3.75365	3.43942	3.43878
ENSMUSG00000034343.15	chr1:91178033-91218059	Ube2f	protein_coding	MGI:1915171	NA	2	1277.52	-0.252964	0.0998998	-2.53217	0.0113358	0.0822284	8.51653	9.30958	7.27729	6.74979	7.86763	6.35382
ENSMUSG00000029426.9	chr5:92589173-92653496	Scarb2	protein_coding	MGI:1196458	overlapping_locus	2	3512.77	-0.216733	0.0856074	-2.53171	0.0113508	0.0822861	28.7056	34.0756	28.0096	25.7527	29.5961	22.78
ENSMUSG00000063060.7	chr14:64181122-64188181	Sox7	protein_coding	MGI:98369	NA	2	261.379	0.618988	0.244572	2.5309	0.0113771	0.0824261	2.04929	2.36036	2.29454	4.2941	2.54192	3.47575
ENSMUSG00000022744.13	chr16:58548273-58554614	Cldnd1	protein_coding	MGI:2447860	NA	2	993.934	-0.235623	0.0931446	-2.52965	0.0114176	0.0826693	18.33	16.7538	15.7648	13.4714	13.8794	15.8278
ENSMUSG00000021904.7	chr14:30939817-30952309	Sema3g	protein_coding	MGI:3041242	NA	2	454.855	0.476749	0.188482	2.52941	0.0114254	0.0826745	2.45594	3.05663	3.34828	4.07625	3.39015	4.79122
ENSMUSG00000040659.4	chr4:141585453-141602231	Efhd2	protein_coding	MGI:106504	NA	2	161.182	0.513527	0.203134	2.52801	0.011471	0.0829537	1.46208	1.6078	2.45253	2.57935	2.13286	3.09309
ENSMUSG00000038482.12	chr8:13388751-13428448	Tfdp1	protein_coding	MGI:101934	NA	2	1213.46	-0.25456	0.10075	-2.52665	0.0115156	0.0832257	16.1249	15.8481	18.1074	13.2585	15.2168	13.4098
ENSMUSG00000062352.16	chr12:21290826-21336285	Itgb1bp1	protein_coding	MGI:1306802	fragmented_locus	2	589.902	-0.276534	0.109522	-2.52491	0.0115729	0.083588	8.10007	7.86467	7.51485	6.71379	6.39679	6.27886
ENSMUSG00000020773.12	chr11:115996578-116018036	Trim47	protein_coding	MGI:1917374	overlapping_locus	2	269.719	0.595846	0.236037	2.52437	0.0115905	0.0836294	1.90003	2.48128	3.54719	4.50596	2.55191	4.73786
ENSMUSG00000055041.9	chr15:76784110-76785505	Commd5	protein_coding	MGI:1913648	NA	2	162.294	-0.48127	0.190657	-2.52427	0.0115938	0.0836294	6.61592	7.71543	6.64571	5.09855	4.34866	5.59927
ENSMUSG00000023977.16	chr17:47239221-47321482	Ubr2	protein_coding	MGI:1861099	ncRNA_host	2	3768.18	0.164684	0.0652447	2.52409	0.0115998	0.0836294	15.5435	16.0131	16.8029	16.7595	17.0942	20.5586
ENSMUSG00000025997.14	chr1:69570373-69726404	Ikzf2	protein_coding	MGI:1342541	overlapping_locus	1	240.095	-0.479288	0.189952	-2.52321	0.0116288	0.0837871	1.31953	1.21027	0.746904	0.708192	0.781528	0.793295
ENSMUSG00000023830.15	chr17:12901293-12988551	Igf2r	protein_coding	MGI:96435	NA	2	2990.51	-0.249104	0.0987524	-2.52251	0.011652	0.0838882	11.8759	12.773	12.1356	10.746	9.62476	10.613
ENSMUSG00000025041.18	chr19:46871756-47003592	Nt5c2	protein_coding	MGI:2178563	NA	2	258.618	0.380774	0.15096	2.52236	0.0116571	0.0838882	0.554114	0.950729	1.1037	1.03561	1.05454	1.179
ENSMUSG00000025213.12	chr19:45063680-45067728	Kazald1	protein_coding	MGI:2147606	overlapping_locus	2	100.679	-0.824255	0.326914	-2.52132	0.0116914	0.0840843	1.26056	3.39009	3.56571	1.99721	1.75065	0.850343
ENSMUSG00000024645.6	chr18:84964316-84969649	Timm21	protein_coding	MGI:1920595	NA	2	490.616	0.335189	0.132977	2.52065	0.0117137	0.0841812	6.56458	6.8172	6.48528	8.42646	8.57793	8.02291
ENSMUSG00000022484.8	chr15:102875231-102880328	Hoxc10	protein_coding	MGI:96192	overlapping_locus	2	2721.97	-0.174713	0.0693171	-2.52049	0.0117192	0.0841812	61.2881	48.6292	50.4479	43.345	46.4514	51.8939
ENSMUSG00000039262.17	chr2:32041094-32124549	Prrc2b	protein_coding	MGI:1923304	ncRNA_host	2	7180.44	-0.235588	0.0935044	-2.51954	0.0117508	0.0843568	26.0191	25.3471	22.5402	20.3806	21.2144	21.1219
ENSMUSG00000051177.17	chr2:134627987-135317178	Plcb1	protein_coding	MGI:97613	overlapping_locus	2	82.3231	0.775955	0.308008	2.51927	0.0117599	0.0843713	0.272047	0.271887	0.295336	0.637224	0.456387	0.357966
ENSMUSG00000061859.18	chr4:98284022-98607840	Patj	protein_coding	MGI:1277960	ncRNA_host	2	64.5711	0.708165	0.281138	2.51892	0.0117715	0.0844029	0.0881632	0.122289	0.180751	0.220859	0.162248	0.221927
ENSMUSG00000023892.9	chr17:21670636-21685849	Zfp51	protein_coding	MGI:99198	NA	2	253.666	-0.376058	0.149311	-2.51863	0.0117813	0.0844223	4.25336	4.51243	3.8771	3.5153	3.65247	2.63179
ENSMUSG00000028282.13	chr4:32615451-32653265	Casp8ap2	protein_coding	MGI:1349399	NA	2	205.792	-0.454797	0.180597	-2.5183	0.0117922	0.0844489	1.18259	1.31921	1.08179	0.821737	0.885135	0.901369
ENSMUSG00000041130.11	chr17:24888661-24900990	Zfp598	protein_coding	MGI:2670965	NA	2	993.512	-0.355717	0.141274	-2.51792	0.0118049	0.0844882	11.2886	11.2129	12.6647	9.74715	8.23549	9.55781
ENSMUSG00000037754.14	chr2:158507318-158608254	Ppp1r16b	protein_coding	MGI:2151841	ncRNA_host	2	153.184	0.547159	0.217487	2.51582	0.0118755	0.084942	0.799421	0.765879	0.861265	1.27346	1.23413	1.06226
ENSMUSG00000037822.13	chr5:65604187-65694527	Smim14	protein_coding	MGI:1915802	overlapping_locus	2	738.111	-0.238984	0.0950131	-2.51527	0.0118941	0.0850096	5.99009	5.66333	5.95717	5.32209	4.95441	4.67775
ENSMUSG00000037286.16	chr9:100479851-100840598	Stag1	protein_coding	MGI:1098658	overlapping_locus	2	785.756	-0.323357	0.128568	-2.51507	0.0119009	0.0850096	3.98429	4.54287	3.5877	3.10037	3.52131	3.03116
ENSMUSG00000024968.15	chr19:7244690-7252590	Rcor2	protein_coding	MGI:1859854	NA	2	111.972	-1.06678	0.424182	-2.5149	0.0119065	0.0850096	2.03604	1.5919	2.07105	1.41424	0.863937	0.44635
ENSMUSG00000039041.16	chr2:179813278-179818079	Adrm1	protein_coding	MGI:1929289	NA	2	2439.55	-0.266806	0.106107	-2.51451	0.0119199	0.0850538	68.8255	65.9472	53.8026	50.6518	50.1854	55.0433
ENSMUSG00000025647.17	chr9:108867633-108886845	Shisa5	protein_coding	MGI:1915044	NA	2	332.585	0.46027	0.183077	2.51407	0.0119345	0.0851065	2.55059	3.13566	4.49444	5.28812	3.4401	4.99665
ENSMUSG00000034457.11	chrX:96377446-96420822	Eda2r	protein_coding	MGI:2442860	NA	2	357.139	-0.714153	0.284102	-2.51372	0.0119464	0.0851398	2.77661	5.2779	2.82753	1.9204	1.98158	2.86323
ENSMUSG00000037405.9	chr9:20927281-20940113	Icam1	protein_coding	MGI:96392	NA	2	110.703	0.724512	0.288317	2.5129	0.0119743	0.0852871	0.696581	1.06395	1.5357	1.85737	1.30471	2.1697
ENSMUSG00000053907.11	chr6:72409782-72416541	Mat2a	protein_coding	MGI:2443731	NA	2	4268.89	0.349843	0.139265	2.51208	0.0120023	0.0853537	40.3824	30.8507	35.367	40.9667	39.2307	57.5356
ENSMUSG00000035296.15	chr14:61456564-61495939	Sgcg	protein_coding	MGI:1346524	NA	1	4523.77	-0.180892	0.0720092	-2.51206	0.0120028	0.0853537	47.2578	50.866	42.1334	41.5856	42.5121	39.4244
ENSMUSG00000031066.11	chrX:20570145-20586778	Usp11	protein_coding	MGI:2384312	NA	2	70.4355	0.631635	0.251448	2.51199	0.0120054	0.0853537	0.385023	0.405755	0.873282	0.659623	0.603592	1.33503
ENSMUSG00000017491.10	chr14:5650540-6038924	Rarb	protein_coding	MGI:97857	NA	2	244.073	-0.375003	0.14937	-2.51056	0.0120541	0.0856095	3.58712	2.07956	1.94932	1.83801	1.81371	2.0284
ENSMUSG00000027022.15	chr2:67004178-67356959	Xirp2	protein_coding	MGI:2685198	ncRNA_host	2	97329.2	-0.437001	0.174074	-2.51043	0.0120584	0.0856095	287.88	362.053	297.388	248.753	179.56	273.393
ENSMUSG00000000031.17	chr7:142129266-142131880	H19	lncRNA	MGI:95891	ncRNA_host	2	15679.5	0.925337	0.368617	2.51029	0.0120631	0.0856095	56.8922	176.978	258.867	297.552	248.031	229.724
ENSMUSG00000068614.8	chr2:113877763-113884029	Actc1	protein_coding	MGI:87905	NA	2	1561.09	2.47333	0.985708	2.50919	0.0121008	0.0857868	1.15373	8.49604	71.8378	66.45	88.3492	36.1255
ENSMUSG00000112041.2	chr12:11235994-11254503	9530020I12Rik	lncRNA	MGI:1924692	NA	2	121.886	1.04526	0.416581	2.50913	0.0121029	0.0857868	0.81731	0.533298	2.34025	1.95393	1.55071	2.55779
ENSMUSG00000087590.3	chr18:33927945-33929039	Epb41l4aos	lncRNA	MGI:1916999	ncRNA_host	2	61.1397	-0.671453	0.267626	-2.50893	0.0121099	0.0857868	7.39185	5.26069	5.53267	4.09429	2.9071	4.48051
ENSMUSG00000033400.15	chr3:116533648-116601815	Agl	protein_coding	MGI:1924809	NA	2	30365.8	-0.29584	0.117936	-2.50849	0.012125	0.0858424	96.2413	89.9639	85.6891	65.4734	71.7292	85.2101
ENSMUSG00000039804.16	chr2:164842277-164876787	Ncoa5	protein_coding	MGI:2385165	NA	1	343.867	0.318974	0.127191	2.50783	0.0121475	0.0859504	2.57827	2.46604	3.52884	3.44144	3.58534	3.54914
ENSMUSG00000029103.17	chr5:35248845-35263110	Lrpap1	protein_coding	MGI:96829	NA	2	914.424	-0.190249	0.0758988	-2.50662	0.0121891	0.0861366	10.1024	10.9847	10.5027	9.54045	9.69875	8.47986
ENSMUSG00000031403.15	chrX:74139460-74153383	Dkc1	protein_coding	MGI:1861727	ncRNA_host	2	663.157	-0.223822	0.089299	-2.50643	0.0121956	0.0861366	9.39378	8.25625	8.47234	7.28826	7.66115	7.38222
ENSMUSG00000036856.5	chr4:137004800-137027037	Wnt4	protein_coding	MGI:98957	NA	2	572.199	-0.573371	0.22876	-2.50643	0.0121957	0.0861366	5.13666	5.6011	6.29869	3.36798	4.49571	3.65277
ENSMUSG00000053094.16	chr5:130245922-130272606	Tmem248	protein_coding	MGI:1918917	NA	2	1200.17	-0.238446	0.0951578	-2.50579	0.0122177	0.0862131	12.5205	12.4565	10.5182	9.96017	10.7651	9.27824
ENSMUSG00000038663.8	chr7:81183056-81216692	Fsd2	protein_coding	MGI:2444310	NA	2	13502.4	-0.270503	0.107955	-2.50569	0.0122212	0.0862131	173.26	116.205	128.425	118.945	99.8122	124.111
ENSMUSG00000030613.14	chr7:92210357-92231502	Ccdc90b	protein_coding	MGI:1913615	NA	2	403.975	0.336605	0.134369	2.50507	0.0122426	0.0863127	6.69523	8.59893	7.65127	9.22977	10.339	9.28266
ENSMUSG00000024030.8	chr17:31276649-31336962	Abcg1	protein_coding	MGI:107704	ncRNA_host	2	52.1469	1.00777	0.402389	2.50446	0.012264	0.0863679	0.191722	0.127161	0.270945	0.418884	0.285474	0.490506
ENSMUSG00000036461.17	chr14:79718634-79819934	Elf1	protein_coding	MGI:107180	NA	2	222.919	0.513946	0.205215	2.50442	0.0122651	0.0863679	0.793817	0.761945	0.926397	1.3127	0.997335	1.22232
ENSMUSG00000019820.12	chr10:12257932-12745109	Utrn	protein_coding	MGI:104631	ncRNA_host	2	983.009	0.303277	0.121176	2.50279	0.012322	0.0866854	1.9088	2.0331	2.35247	2.55686	2.19014	3.05548
ENSMUSG00000020079.16	chr10:62264988-62285517	Supv3l1	protein_coding	MGI:2441711	NA	2	459.974	0.319817	0.127793	2.50262	0.0123276	0.0866854	5.89252	6.62491	5.41282	7.48536	8.19056	6.67746
ENSMUSG00000031561.17	chr8:48680717-49296986	Tenm3	protein_coding	MGI:1345183	NA	2	591.135	-0.508969	0.203385	-2.50249	0.0123322	0.0866854	2.6591	2.57503	2.18973	2.00668	1.39339	1.81769
ENSMUSG00000041528.16	chr9:107928733-107960545	Rnf123	protein_coding	MGI:2148796	NA	2	4453.25	-0.240954	0.0963073	-2.50193	0.0123519	0.0867418	30.9415	26.7015	30.1219	23.226	24.2051	26.861
ENSMUSG00000025969.16	chr1:62742444-62857854	Nrp2	protein_coding	MGI:1100492	overlapping_locus	2	421.632	0.561547	0.224454	2.50184	0.0123549	0.0867418	1.09848	1.0645	1.41089	2.16548	1.33225	1.77526
ENSMUSG00000043445.8	chr17:24689366-24692084	Pgp	protein_coding	MGI:1914328	NA	2	2682.4	-0.227351	0.0908974	-2.50118	0.012378	0.0868312	45.3245	41.2995	31.7318	35.3945	38.4545	27.2419
ENSMUSG00000113940.2	chr12:85475884-85483023	Gm40477	lncRNA	MGI:5623362	NA	2	41.35	1.00179	0.400548	2.50106	0.0123824	0.0868312	0.90174	0.894141	0.966386	2.52463	1.41967	1.61065
ENSMUSG00000038121.7	chr18:68393258-68433404	Fam210a	protein_coding	MGI:1914000	ncRNA_host	2	4776.93	0.198139	0.079248	2.50024	0.0124111	0.0869293	16.1234	16.234	17.2509	20.315	20.2944	16.5585
ENSMUSG00000042133.17	chr2:69552889-69584356	Ppig	protein_coding	MGI:2445173	NA	2	1225.63	-0.215802	0.0863127	-2.50023	0.0124111	0.0869293	6.96344	6.30408	5.05562	5.47451	5.32592	4.85897
ENSMUSG00000033436.14	chrX:133704894-133709970	Armcx2	protein_coding	MGI:1914666	NA	2	79.591	0.685842	0.274411	2.49933	0.012443	0.0871008	0.445299	0.32636	0.640841	0.795008	0.632107	0.788518
ENSMUSG00000027429.17	chr2:144398149-144432669	Sec23b	protein_coding	MGI:1350925	NA	2	215.33	-0.689313	0.275884	-2.49857	0.0124697	0.0872363	1.2489	1.73262	1.74045	0.688662	1.09097	1.20314
ENSMUSG00000035168.17	chr2:59442386-59676493	Tanc1	protein_coding	MGI:1914110	NA	2	317.984	0.50263	0.201189	2.49829	0.0124793	0.0872519	1.0741	1.16819	1.31555	1.98103	1.64126	1.41709
ENSMUSG00000003847.17	chr8:108020102-108106149	Nfat5	protein_coding	MGI:1859333	NA	2	1115.34	0.377512	0.151125	2.49802	0.012489	0.0872675	2.60423	2.70492	2.38304	3.25533	2.7912	4.02616
ENSMUSG00000025199.17	chr19:44061774-44095919	Chuk	protein_coding	MGI:99484	NA	2	471.685	0.266895	0.106858	2.49765	0.012502	0.0873066	4.5093	4.98123	4.54364	5.76381	5.79307	5.30627
ENSMUSG00000031983.8	chr8:125362495-125390108	2310022B05Rik	protein_coding	MGI:1916801	NA	2	394.705	-0.386848	0.154946	-2.49667	0.0125367	0.0874836	5.67532	6.62986	3.50356	4.55609	4.33916	3.05389
ENSMUSG00000029613.16	chr5:143803543-143841069	Eif2ak1	protein_coding	MGI:1353448	NA	2	1382.16	-0.437446	0.175225	-2.49648	0.0125433	0.0874836	11.0703	13.9105	14.459	9.75056	11.6214	8.0614
ENSMUSG00000005682.10	chr10:128139204-128157222	Pan2	protein_coding	MGI:1918984	NA	2	286.805	0.447782	0.179378	2.4963	0.0125495	0.0874836	1.82161	1.57066	1.87034	2.27992	2.81152	2.10996
ENSMUSG00000027412.13	chr2:160722590-160747922	Lpin3	protein_coding	MGI:1891342	NA	2	85.5046	0.911859	0.365343	2.4959	0.0125639	0.0875049	0.341448	0.565266	0.669122	1.07511	0.599252	1.26182
ENSMUSG00000034485.11	chr9:60701824-60787652	Uaca	protein_coding	MGI:1919815	NA	2	9934.58	-0.374929	0.150224	-2.4958	0.0125674	0.0875049	96.1029	118.88	66.9081	84.896	67.8499	62.0088
ENSMUSG00000015002.19	chr15:65658883-65745665	Efr3a	protein_coding	MGI:1923990	NA	2	1437.2	-0.176501	0.0707295	-2.49544	0.0125801	0.0875412	7.06295	7.3221	6.30016	6.28075	6.2504	5.76002
ENSMUSG00000037242.9	chr4:134941280-135000125	Clic4	protein_coding	MGI:1352754	NA	2	1821.36	0.732303	0.293514	2.49495	0.0125974	0.0876099	6.0631	8.19555	8.14612	15.4567	7.43538	14.8319
ENSMUSG00000020738.17	chr11:115413928-115427102	Sumo2	protein_coding	MGI:2158813	NA	2	885.772	-0.268692	0.107711	-2.49457	0.0126109	0.0876524	28.731	31.7124	31.2412	24.9309	25.9758	25.318
ENSMUSG00000036002.13	chr4:43032414-43046220	Fam214b	protein_coding	MGI:2441854	NA	2	988.931	-0.288481	0.115665	-2.4941	0.0126276	0.0877167	9.21314	10.7043	8.31346	7.81376	7.34799	7.85705
ENSMUSG00000026895.8	chr2:35926338-35939418	Ndufa8	protein_coding	MGI:1915625	NA	2	4530.61	0.217044	0.0870546	2.4932	0.0126599	0.087842	181.183	197.754	155.955	218.743	227.338	176.666
ENSMUSG00000068196.6	chr16:57444621-57575100	Col8a1	protein_coding	MGI:88463	NA	2	96.2063	0.640186	0.256775	2.49318	0.0126605	0.087842	0.266682	0.5706	0.955694	0.753452	0.836143	0.985526
ENSMUSG00000053062.17	chr16:84571011-84622816	Jam2	protein_coding	MGI:1933820	ncRNA_host	2	955.482	0.384406	0.154266	2.49185	0.012708	0.08812	4.22314	5.24613	6.34801	8.40532	6.76811	5.4798
ENSMUSG00000021256.6	chr12:86725474-86738865	Vash1	protein_coding	MGI:2442543	NA	2	104.584	0.819509	0.328996	2.49093	0.0127408	0.0882759	1.22297	1.48968	0.97481	2.88286	1.70345	1.91301
ENSMUSG00000061244.15	chr14:49241547-49304110	Exoc5	protein_coding	MGI:2145645	NA	2	831.147	-0.279865	0.112359	-2.4908	0.0127455	0.0882759	2.80887	2.93575	2.02426	2.11501	2.31122	1.91111
ENSMUSG00000003849.9	chr8:108114857-108129838	Nqo1	protein_coding	MGI:103187	NA	2	369.996	-0.521077	0.209361	-2.48889	0.0128143	0.0887004	9.12885	9.29983	10.2459	7.30276	6.07051	6.56306
ENSMUSG00000025203.7	chr19:44282113-44295303	Scd2	protein_coding	MGI:98240	ncRNA_host	2	441.875	0.712141	0.28627	2.48765	0.0128589	0.0889154	2.74238	1.21016	3.53978	3.34197	2.24491	6.28428
ENSMUSG00000052144.9	chr6:100810583-100846895	Ppp4r2	protein_coding	MGI:3027896	NA	2	1263.06	-0.245433	0.0986789	-2.48719	0.0128756	0.0889154	10.5583	11.0674	8.76696	8.97148	8.73615	7.86744
ENSMUSG00000041426.13	chr1:52884172-52960145	Hibch	protein_coding	MGI:1923792	NA	1	1120.83	0.22067	0.088725	2.48712	0.0128781	0.0889154	17.7172	19.1061	19.1301	22.3035	22.2428	20.7818
ENSMUSG00000043008.10	chr16:19765246-19801787	Klhl6	protein_coding	MGI:2686922	NA	2	35.4768	0.926492	0.372521	2.48709	0.0128794	0.0889154	0.426412	0.518079	0.451047	0.990935	1.0105	0.704339
ENSMUSG00000056268.16	chr1:138891173-139106698	Dennd1b	protein_coding	MGI:2447812	overlapping_locus	2	623.746	-0.358784	0.144272	-2.48686	0.0128877	0.0889154	1.99619	2.24473	1.84705	1.42348	1.48722	1.83079
ENSMUSG00000024583.4	chr18:63794165-63841872	Txnl1	protein_coding	MGI:1860078	NA	2	1866.77	-0.238098	0.0957455	-2.48678	0.0128905	0.0889154	12.0006	12.6684	9.84815	9.62468	10.2101	9.24641
ENSMUSG00000025027.19	chr19:52920357-53028645	Xpnpep1	protein_coding	MGI:2180003	ncRNA_host	2	748.04	0.217846	0.0876277	2.48604	0.0129175	0.089049	2.93349	3.11307	3.23976	3.54035	3.7791	3.46302
ENSMUSG00000024587.11	chr18:64632718-64649723	Nars	protein_coding	MGI:1917473	NA	2	3293.65	-0.157583	0.0633939	-2.48577	0.0129271	0.0890636	46.8173	42.0073	37.9047	37.16	36.962	39.0867
ENSMUSG00000034254.18	chr17:34823236-34832423	Agpat1	protein_coding	MGI:1932075	NA	2	2223.84	-0.210414	0.0846949	-2.48438	0.0129778	0.0893609	32.4582	32.0835	34.788	26.3249	29.0864	30.3928
ENSMUSG00000042138.10	chr9:37400317-37435921	Msantd2	protein_coding	MGI:2384579	NA	2	108.823	0.532129	0.214323	2.48284	0.0130339	0.0896948	0.868817	0.814839	0.924102	1.11325	1.29034	1.3331
ENSMUSG00000039713.18	chr4:152156955-152199857	Plekhg5	protein_coding	MGI:2652860	NA	2	324.271	0.453501	0.18268	2.48248	0.0130471	0.0897332	1.81515	2.3382	2.37719	3.23887	2.59638	3.07108
ENSMUSG00000027404.17	chr2:130013555-130021323	Snrpb	protein_coding	MGI:98342	NA	2	2469.59	-0.207238	0.083507	-2.48168	0.0130766	0.0898832	59.0056	61.9393	51.3175	51.4274	53.1817	44.5395
ENSMUSG00000040842.18	chr4:140840312-140867086	Szrd1	protein_coding	MGI:1098672	NA	2	3740.31	-0.250741	0.101068	-2.48092	0.0131045	0.0900231	43.9619	49.8435	38.8647	36.9434	38.6846	35.5577
ENSMUSG00000039997.17	chr1:173747973-173770238	Ifi203	protein_coding	MGI:96428	NA	1	301.892	0.88702	0.35757	2.48069	0.0131129	0.0900285	1.60007	2.17294	2.22922	5.39683	3.03015	2.75328
ENSMUSG00000026434.13	chr1:131838272-131864059	Nucks1	protein_coding	MGI:1934811	overlapping_locus	2	1343.17	-0.195854	0.0789595	-2.48043	0.0131222	0.0900398	9.84742	9.24235	7.40084	7.7397	8.22814	7.01499
ENSMUSG00000025733.18	chr17:26057431-26063825	Rhot2	protein_coding	MGI:2384892	overlapping_locus	2	4120.64	0.197572	0.0796721	2.47981	0.0131452	0.0901171	38.6648	50.3003	41.3859	53.522	60.8046	37.1473
ENSMUSG00000022425.17	chr15:54702297-54816288	Enpp2	protein_coding	MGI:1321390	NA	2	359.733	0.777175	0.313413	2.47971	0.0131488	0.0901171	2.23556	1.93899	3.35376	4.02559	3.25023	5.62991
ENSMUSG00000062980.16	chr6:21985915-22256403	Cped1	protein_coding	MGI:2444814	NA	2	846.257	-0.398015	0.160568	-2.4788	0.0131825	0.0902961	4.07261	4.13317	4.53498	3.5154	3.20231	2.96022
ENSMUSG00000036890.14	chr2:44454424-44817669	Gtdc1	protein_coding	MGI:2444269	NA	2	457.652	-0.366286	0.147832	-2.47772	0.0132224	0.0905166	2.58371	2.05218	1.99925	1.6216	1.80342	1.68934
ENSMUSG00000056153.16	chr18:88683348-88945605	Socs6	protein_coding	MGI:1924885	NA	2	1157.81	-0.295588	0.119313	-2.47742	0.0132336	0.0905409	4.25882	5.05203	3.3513	3.61123	3.45815	3.17617
ENSMUSG00000025574.14	chr11:117706352-117716918	Tk1	protein_coding	MGI:98763	NA	2	75.3947	-0.655524	0.264634	-2.4771	0.0132456	0.0905708	2.87298	2.41677	2.23143	1.81968	1.82661	1.18687
ENSMUSG00000020263.15	chr10:83435897-83484602	Appl2	protein_coding	MGI:2384914	NA	2	557.104	0.380797	0.153752	2.4767	0.0132602	0.0906175	3.92703	4.07472	6.23641	5.97399	6.60347	5.69835
ENSMUSG00000031465.7	chr8:18740279-18791578	Angpt2	protein_coding	MGI:1202890	NA	2	83.6809	0.940152	0.379698	2.47605	0.0132844	0.0907306	0.615272	0.589457	0.46052	1.74201	0.663421	0.816863
ENSMUSG00000050919.11	chr13:99321331-99387164	Zfp366	protein_coding	MGI:2178429	NA	2	493.861	0.602474	0.243481	2.47443	0.0133451	0.0910642	1.29649	1.18604	1.42816	2.14915	1.67307	2.19109
ENSMUSG00000040606.15	chr4:141829701-142205056	Kazn	protein_coding	MGI:1918779	NA	2	49.1902	0.890534	0.359909	2.47433	0.0133487	0.0910642	0.116968	0.12887	0.270605	0.348046	0.21803	0.344205
ENSMUSG00000029203.17	chr5:65694576-65756331	Ube2k	protein_coding	MGI:1858216	overlapping_locus	2	1562.62	-0.203137	0.0821138	-2.47385	0.0133667	0.0911343	13.2601	12.6158	11.7197	10.401	11.1665	11.044
ENSMUSG00000029056.14	chr4:155048580-155065395	Pank4	protein_coding	MGI:2387466	NA	2	1157.12	0.349756	0.141413	2.47329	0.0133874	0.0911798	15.3438	12.6373	13.8558	18.6474	18.6212	16.3381
ENSMUSG00000028467.16	chr4:43566928-43578873	Gba2	protein_coding	MGI:2654325	NA	2	407.405	0.332098	0.134276	2.47326	0.0133888	0.0911798	4.52704	3.91566	3.40875	5.476	5.27617	4.19997
ENSMUSG00000020340.17	chr11:46084677-46203686	Cyfip2	protein_coding	MGI:1924134	overlapping_locus	2	1254.47	1.92217	0.777263	2.473	0.0133985	0.0911934	0.113647	8.05364	4.41071	13.1135	16.1177	2.74302
ENSMUSG00000038520.16	chr7:44484047-44498503	Tbc1d17	protein_coding	MGI:2449973	NA	2	1179.02	-0.276505	0.111842	-2.47229	0.0134251	0.0913215	4.84908	5.29205	5.99899	4.53728	4.26673	4.52778
ENSMUSG00000019971.11	chr10:100323420-100409517	Cep290	protein_coding	MGI:2384917	NA	2	113.775	-0.852037	0.34471	-2.47175	0.0134453	0.091406	0.608343	0.875877	0.432294	0.381904	0.257732	0.44892
ENSMUSG00000064068.16	chr3:89116388-89134395	Mtx1	protein_coding	MGI:103025	NA	2	331.3	0.320059	0.12951	2.4713	0.0134623	0.0914242	3.41723	3.92862	3.8527	4.46546	4.37816	5.17009
ENSMUSG00000039157.13	chr2:32425345-32459768	Fam102a	protein_coding	MGI:2138935	NA	2	199.691	0.943842	0.381951	2.47111	0.0134695	0.0914242	1.02658	1.04428	1.21496	2.81752	2.59595	1.11538
ENSMUSG00000033377.15	chr3:116711907-116762636	Palmd	protein_coding	MGI:2148896	NA	2	1054.46	0.410479	0.166114	2.47106	0.0134712	0.0914242	7.30963	7.45584	11.3045	9.16648	10.6564	14.738
ENSMUSG00000031490.7	chr8:27750357-27766702	Eif4ebp1	protein_coding	MGI:103267	NA	2	613.848	-0.432026	0.174895	-2.4702	0.0135039	0.0915934	12.0847	8.57756	9.72206	5.85431	6.91391	10.061
ENSMUSG00000052446.18	chr8:72704882-72747636	Zfp961	protein_coding	MGI:3583954	NA	1	62.9084	0.746755	0.302355	2.4698	0.013519	0.0916431	0.32595	0.451681	0.520411	0.755753	0.739101	0.673974
ENSMUSG00000028456.19	chr4:43058969-43264871	Unc13b	protein_coding	MGI:1342278	NA	2	167.77	0.403648	0.163477	2.46915	0.0135435	0.0917571	0.209072	0.26917	0.368319	0.323062	0.368112	0.403954
ENSMUSG00000026234.13	chr1:86272441-86287122	Ncl	protein_coding	MGI:97286	ncRNA_host	2	4884.46	-0.174066	0.0705192	-2.46835	0.0135736	0.0918578	21.3887	21.3339	20.1933	18.2471	18.286	19.2514
ENSMUSG00000031799.11	chr8:72884018-72906986	Tpm4	protein_coding	MGI:2449202	NA	2	926.438	0.636424	0.25785	2.4682	0.0135794	0.0918578	5.93793	8.95983	9.00489	15.3353	8.66713	12.8499
ENSMUSG00000000581.9	chr11:17207579-17219176	C1d	protein_coding	MGI:1927354	NA	2	641.615	-0.245607	0.0995112	-2.46814	0.0135818	0.0918578	6.55438	6.7839	5.97827	5.72893	5.44976	5.13371
ENSMUSG00000019966.19	chr10:99851492-99936278	Kitl	protein_coding	MGI:96974	NA	2	925.888	0.507274	0.205547	2.46793	0.0135898	0.0918594	3.57523	3.57652	4.95814	6.2534	4.84663	5.93269
ENSMUSG00000024812.12	chr19:24071869-24202394	Tjp2	protein_coding	MGI:1341872	overlapping_locus	2	179.466	0.514596	0.208551	2.46748	0.0136066	0.0918943	0.610409	0.954389	0.847305	1.07658	1.07549	1.30333
ENSMUSG00000064373.14	chr15:3298029-3309990	Selenop	protein_coding	MGI:894288	NA	2	2603.97	0.353807	0.143394	2.46738	0.0136105	0.0918943	24.5654	30.4145	42.0367	42.2835	38.7933	40.2197
ENSMUSG00000031778.14	chr8:95498637-95509055	Cx3cl1	protein_coding	MGI:1097153	NA	2	66.0149	0.781295	0.316707	2.46693	0.0136276	0.0919555	0.218242	0.475975	0.699697	0.968878	0.689174	0.585117
ENSMUSG00000026335.17	chr1:97722839-98023371	Pam	protein_coding	MGI:97475	overlapping_locus	2	797.609	0.423678	0.171757	2.46673	0.0136352	0.0919555	2.66799	3.84144	5.57712	5.64873	4.2154	5.73561
ENSMUSG00000030591.18	chr7:28873613-28880126	Psmd8	protein_coding	MGI:1888669	NA	2	2979.93	-0.223308	0.0906112	-2.46446	0.013722	0.0924421	75.9419	52.2497	36.8152	42.3368	44.2361	49.1719
ENSMUSG00000018858.16	chr11:115294578-115303500	Mrpl58	protein_coding	MGI:1915822	NA	2	611.749	0.22308	0.0905198	2.46443	0.013723	0.0924421	7.3557	7.86006	7.40932	9.27718	9.3823	7.86277
ENSMUSG00000031201.18	chrX:74460234-74497607	Brcc3	protein_coding	MGI:2389572	NA	2	505.509	-0.274074	0.11125	-2.46358	0.0137556	0.092609	4.52474	4.0119	3.77305	3.29591	3.77056	3.0783
ENSMUSG00000015363.14	chr15:88959327-88971280	Trabd	protein_coding	MGI:1915226	NA	2	1025.38	-0.2875	0.116718	-2.4632	0.0137702	0.0926186	12.888	15.3372	11.3882	10.1307	12.6541	9.52154
ENSMUSG00000016087.14	chr9:32333500-32454157	Fli1	protein_coding	MGI:95554	ncRNA_host	2	194.218	0.444152	0.180321	2.46311	0.0137736	0.0926186	1.53412	2.3211	1.87898	3.0302	2.78657	2.06807
ENSMUSG00000031393.17	chrX:73070198-73178969	Mecp2	protein_coding	MGI:99918	NA	2	1295.58	-0.239162	0.0971048	-2.46293	0.0137806	0.0926186	5.14907	4.80936	4.39882	3.9273	4.09623	4.11608
ENSMUSG00000029047.14	chr4:155151473-155156890	Pex10	protein_coding	MGI:2684988	NA	2	292.063	0.410209	0.166612	2.46207	0.0138139	0.09279	2.72302	2.54574	3.1946	3.33949	3.56924	4.36249
ENSMUSG00000048007.5	chrX:133438005-133442614	Timm8a1	protein_coding	MGI:1353433	NA	2	87.7359	0.689056	0.27994	2.46144	0.0138381	0.0928998	1.84625	1.77559	1.95687	3.14059	3.11561	2.79911
ENSMUSG00000047454.13	chr12:78273153-78731546	Gphn	protein_coding	MGI:109602	overlapping_locus	2	1273.07	-0.181591	0.0737948	-2.46075	0.0138647	0.093009	12.0712	13.2824	13.6675	11.5326	11.2796	11.5663
ENSMUSG00000025732.7	chr17:26082672-26087738	Mcrip2	protein_coding	MGI:1915491	NA	2	1092.58	0.320929	0.130427	2.46061	0.0138702	0.093009	30.329	33.2474	27.3938	36.7017	47.4761	30.3141
ENSMUSG00000019866.16	chr10:43826632-44024849	Crybg1	protein_coding	MGI:109544	NA	2	71.751	0.605871	0.246275	2.46014	0.0138883	0.0930775	0.226418	0.267738	0.265429	0.377983	0.377335	0.406411
ENSMUSG00000031631.16	chr8:46604808-46648627	Cfap97	protein_coding	MGI:1914006	overlapping_locus	1	428.18	-0.278141	0.113078	-2.45973	0.013904	0.09313	3.55199	3.93894	3.44461	3.09481	3.08005	2.84467
ENSMUSG00000025871.19	chr13:54699031-54713248	4833439L19Rik	protein_coding	MGI:1921162	NA	2	6149.89	-0.233581	0.0949977	-2.45881	0.0139398	0.0933167	92.2436	86.0006	84.3553	73.3585	84.4199	66.3574
ENSMUSG00000066621.13	chr5:144131260-144160433	Tecpr1	protein_coding	MGI:1917631	NA	1	1005.6	0.33931	0.138018	2.45845	0.013954	0.0933589	6.44836	5.94462	7.14372	9.15176	8.67927	7.13107
ENSMUSG00000024981.7	chr19:55240370-55286152	Acsl5	protein_coding	MGI:1919129	NA	2	156.246	0.61411	0.249837	2.45804	0.0139697	0.0934107	0.652355	0.952596	1.29515	1.8102	1.05366	1.48406
ENSMUSG00000018166.9	chr10:128403392-128425521	Erbb3	protein_coding	MGI:95411	ncRNA_host	2	140.356	0.705265	0.287019	2.45721	0.0140022	0.0935754	0.620591	0.759259	0.744685	1.15016	1.14716	1.15186
ENSMUSG00000030965.20	chr7:132460954-132486840	Abraxas2	protein_coding	MGI:1926116	NA	2	763.769	-0.209385	0.0852524	-2.45606	0.0140469	0.0937793	10.3913	9.60159	7.74046	8.70391	8.73583	6.56859
ENSMUSG00000068245.15	chr14:59584856-59602919	Phf11d	protein_coding	MGI:1277133	NA	2	32.3508	0.847958	0.345257	2.45602	0.0140486	0.0937793	0.23127	0.414158	0.522935	0.895085	0.734635	0.4602
ENSMUSG00000024294.15	chr18:10725548-10818704	Mib1	protein_coding	MGI:2443157	ncRNA_host	2	2232.61	-0.579253	0.235948	-2.45501	0.0140882	0.0939168	13.8687	9.38754	4.84766	5.01261	5.21761	7.70186
ENSMUSG00000030045.11	chr6:81934832-81942939	Mrpl19	protein_coding	MGI:1926274	NA	2	513.974	0.35636	0.145158	2.45498	0.0140892	0.0939168	3.91603	3.18849	3.05385	4.35255	4.69272	3.9324
ENSMUSG00000027698.15	chr3:27237114-27338757	Nceh1	protein_coding	MGI:2443191	overlapping_locus	2	884.788	0.847457	0.345213	2.45488	0.0140931	0.0939168	3.22816	7.36843	4.24489	9.0886	10.1104	7.05656
ENSMUSG00000001383.10	chr18:36926929-36932719	Zmat2	protein_coding	MGI:1913742	NA	2	1081.76	-0.184739	0.0752644	-2.45454	0.0141066	0.0939171	20.2683	17.8904	17.8693	15.4909	15.3326	18.5371
ENSMUSG00000036402.14	chr6:66873381-66998334	Gng12	protein_coding	MGI:1336171	overlapping_locus	2	622.976	-0.228779	0.0932087	-2.45447	0.0141091	0.0939171	5.18719	5.62295	4.86949	4.90241	4.80968	3.73393
ENSMUSG00000031503.14	chr8:11362805-11499287	Col4a2	protein_coding	MGI:88455	NA	2	2948.98	0.49387	0.201233	2.45422	0.0141191	0.0939307	12.3276	17.0838	13.2161	27.327	16.8895	16.0094
ENSMUSG00000050106.19	chr11:117672902-117683936	Tmc8	protein_coding	MGI:2669037	NA	2	62.2573	0.915729	0.373388	2.45248	0.0141874	0.0943319	0.46839	0.418288	0.460992	1.11317	0.492188	0.947895
ENSMUSG00000029686.16	chr6:47430332-47503073	Cul1	protein_coding	MGI:1349658	NA	2	2463.43	-0.261531	0.106721	-2.4506	0.0142619	0.0947743	24.9511	25.8165	24.5682	21.2686	21.513	20.1194
ENSMUSG00000033763.15	chr8:111448108-111468032	Mtss2	protein_coding	MGI:3039591	NA	2	2355.6	-0.269985	0.110212	-2.44968	0.0142984	0.0949635	19.572	15.12	18.578	14.1904	15.4093	14.5083
ENSMUSG00000026566.16	chr1:165419809-165462107	Mpzl1	protein_coding	MGI:1915731	overlapping_locus	1	158.251	0.619978	0.253135	2.4492	0.0143175	0.0950226	1.46423	1.38602	1.39376	2.49274	2.8836	1.35277
ENSMUSG00000003438.18	chr7:28004941-28011497	Timm50	protein_coding	MGI:1913775	NA	2	904.195	0.216525	0.0884203	2.44882	0.0143326	0.0950226	17.4598	18.2013	17.3615	20.3056	21.6722	19.6913
ENSMUSG00000036606.18	chr15:89039752-89064991	Plxnb2	protein_coding	MGI:2154239	ncRNA_host	2	292.837	0.467388	0.190874	2.44867	0.0143385	0.0950226	1.33659	1.0796	1.89576	2.13816	1.51864	2.22366
ENSMUSG00000025878.17	chr13:55175693-55248113	Uimc1	protein_coding	MGI:103185	NA	2	346.767	-0.358716	0.146496	-2.44864	0.0143395	0.0950226	4.92511	5.03083	4.60298	3.99681	4.30504	3.12859
ENSMUSG00000023019.13	chr15:99615396-99622886	Gpd1	protein_coding	MGI:95679	NA	2	16880.9	-0.481716	0.196757	-2.44829	0.0143537	0.0950633	301.85	215.548	223.459	159.893	209.863	157.947
ENSMUSG00000033088.20	chr15:78831924-78890069	Triobp	protein_coding	MGI:1349410	ncRNA_host	2	1269.12	-0.437857	0.178945	-2.44687	0.0144101	0.0953833	8.21109	5.03506	5.19629	4.21663	4.88745	4.29765
ENSMUSG00000003308.16	chr9:21141026-21150657	Keap1	protein_coding	MGI:1858732	NA	2	2225.95	-0.243598	0.0995738	-2.4464	0.0144289	0.0954542	19.4585	19.6051	16.5445	14.7265	16.1706	15.8981
ENSMUSG00000003352.15	chr15:98528721-98542410	Cacnb3	protein_coding	MGI:103307	NA	2	37.6907	0.862916	0.353047	2.44419	0.0145176	0.0959869	0.166326	0.286826	0.381965	0.528658	0.350576	0.606123
ENSMUSG00000033486.15	chr2:121223112-121244273	Catsper2	protein_coding	MGI:2387404	overlapping_locus	2	116.591	0.513925	0.210576	2.44057	0.0146642	0.0968383	1.05338	1.03027	1.25166	1.54381	1.49326	1.73335
ENSMUSG00000021583.8	chr13:74787687-74841320	Erap1	protein_coding	MGI:1933403	NA	2	564.836	-0.238406	0.097691	-2.44041	0.0146707	0.0968383	4.00035	4.18346	3.88925	3.75022	3.58043	2.9665
ENSMUSG00000000359.4	chr2:152468871-152477114	Rem1	protein_coding	MGI:1097696	NA	2	85.3247	0.63139	0.258724	2.4404	0.014671	0.0968383	1.75961	1.38641	1.54205	2.90515	2.81882	1.71909
ENSMUSG00000033955.14	chr2:84878366-84903392	Tnks1bp1	protein_coding	MGI:2446193	NA	2	749.551	0.346388	0.141966	2.43993	0.0146902	0.0968866	4.14612	3.31088	3.95767	5.29549	4.1628	5.00094
ENSMUSG00000037736.21	chr5:66903188-67214501	Limch1	protein_coding	MGI:1924819	overlapping_locus	2	4228.84	-0.253171	0.103766	-2.43982	0.0146947	0.0968866	18.3385	19.2586	16.3501	14.0374	16.3288	14.8698
ENSMUSG00000024143.16	chr17:87270510-87307497	Rhoq	protein_coding	MGI:1931553	NA	2	6112.19	-0.226532	0.0929031	-2.43837	0.0147538	0.097222	66.6904	56.2978	50.1523	54.1105	53.5788	40.5817
ENSMUSG00000003033.16	chr8:72993862-73011229	Ap1m1	protein_coding	MGI:102776	NA	2	511.335	0.313947	0.128799	2.43749	0.0147895	0.0974026	7.01857	5.98151	7.26322	8.18858	8.81045	8.19464
ENSMUSG00000030530.16	chr7:80038942-80055184	Furin	protein_coding	MGI:97513	NA	2	1385.6	-0.271217	0.111281	-2.43723	0.0148002	0.0974026	11.3347	12.1063	12.0429	9.36258	10.3214	9.78951
ENSMUSG00000030301.18	chr6:147377326-147534110	Ccdc91	protein_coding	MGI:1914265	NA	1	2688.23	-0.35794	0.146872	-2.43709	0.014806	0.0974026	34.3498	37.8785	38.9277	26.6771	24.3822	37.8632
ENSMUSG00000037531.9	chr3:32779546-32791296	Mrpl47	protein_coding	MGI:1921850	NA	2	530.469	0.297919	0.12228	2.43636	0.0148361	0.0975462	5.53205	6.05465	4.5261	6.48861	7.39403	5.84237
ENSMUSG00000015937.16	chr13:56221432-56284174	Macroh2a1	protein_coding	MGI:1349392	NA	2	1381.8	-0.171473	0.0703976	-2.43579	0.0148594	0.0976454	17.8859	18.6563	17.1034	17.0884	15.9038	14.7234
ENSMUSG00000022553.17	chr15:76235494-76238580	Maf1	protein_coding	MGI:1916127	NA	1	2455.6	-0.284074	0.116671	-2.43484	0.0148983	0.0978464	51.7402	48.9886	46.6234	41.6191	44.3823	35.5692
ENSMUSG00000015016.9	chr8:123502225-123544619	Acsf3	protein_coding	MGI:2182591	NA	2	391.323	0.351899	0.144594	2.43371	0.0149449	0.0979989	2.89492	3.29718	4.1476	4.41445	4.83741	3.93925
ENSMUSG00000027900.16	chr3:106455114-106483206	Dram2	protein_coding	MGI:1914421	overlapping_locus	2	1415.3	-0.268289	0.110244	-2.4336	0.0149496	0.0979989	14.9012	16.6461	17.4451	13.7173	14.7266	12.3664
ENSMUSG00000014959.13	chr2:70491920-70542980	Gorasp2	protein_coding	MGI:2135962	NA	2	1978.1	-0.22694	0.0932578	-2.43347	0.0149549	0.0979989	18.4525	18.6077	18.7095	14.9745	17.4226	15.2411
ENSMUSG00000060147.16	chr13:34101901-34186777	Serpinb6a	protein_coding	MGI:103123	NA	2	4845.68	-0.312872	0.128581	-2.43327	0.0149631	0.0979989	82.6952	31.2966	39.0755	25.0543	30.4451	69.0553
ENSMUSG00000028803.19	chr4:135172731-135222349	Nipal3	protein_coding	MGI:1921802	NA	1	462.674	0.403435	0.1658	2.43327	0.0149631	0.0979989	1.78857	1.98935	2.36164	2.23384	2.63242	3.26798
ENSMUSG00000029156.12	chr5:73790092-73805133	Sgcb	protein_coding	MGI:1346523	overlapping_locus	2	3288.67	-0.309113	0.127073	-2.43256	0.0149926	0.0980872	41.1774	33.448	31.1171	25.0135	34.1115	25.8626
ENSMUSG00000032788.16	chr10:78272578-78300809	Pdxk	protein_coding	MGI:1351869	ncRNA_host	2	944.361	0.478263	0.19661	2.43254	0.0149932	0.0980872	1.51633	1.66401	2.45413	2.53296	1.78905	3.60838
ENSMUSG00000042063.12	chr12:116011344-116026980	Zfp386	protein_coding	MGI:1930708	NA	2	513.071	-0.236804	0.0973666	-2.43208	0.0150122	0.0981572	5.34705	4.19621	4.08034	3.73749	3.68729	4.07165
ENSMUSG00000013878.19	chr8:26609396-26641818	Rnf170	protein_coding	MGI:1924983	overlapping_locus	2	776.815	-0.291668	0.119957	-2.43145	0.0150387	0.0982494	5.60488	5.58967	4.59031	4.5553	5.15889	3.29617
ENSMUSG00000018040.10	chr15:82997634-83007002	Rrp7a	protein_coding	MGI:1922028	NA	2	851.771	-0.277279	0.114043	-2.43134	0.0150429	0.0982494	6.78377	7.17657	6.63689	5.79664	5.97565	5.23386
ENSMUSG00000073664.12	chr1:60219758-60377487	Nbeal1	protein_coding	MGI:2444343	NA	2	857.431	-0.495083	0.203661	-2.43092	0.0150606	0.0983105	2.18635	2.01768	2.13419	1.57316	1.36011	1.56493
ENSMUSG00000060568.15	chr1:166828986-166918871	Fam78b	protein_coding	MGI:2443050	NA	2	78.9236	0.914194	0.376142	2.43045	0.01508	0.0983458	0.335019	0.213211	0.439637	0.530801	0.621733	0.668163
ENSMUSG00000024571.16	chr18:80249980-80255956	Naa12	protein_coding	MGI:3833940	overlapping_locus	2	1084.84	-0.245562	0.101038	-2.43039	0.0150827	0.0983458	21.3888	24.2352	21.4659	18.5213	20.5615	17.4668
ENSMUSG00000061393.15	chr9:119231184-119264061	Acvr2b	protein_coding	MGI:87912	NA	2	257.842	-0.434434	0.178838	-2.42921	0.0151318	0.0986113	3.41715	4.04216	2.82766	2.4866	2.84262	2.24383
ENSMUSG00000006850.9	chr18:36868092-36875450	Tmco6	protein_coding	MGI:1919233	NA	2	172.983	-0.462751	0.190526	-2.4288	0.0151487	0.0986674	2.51682	2.62696	2.13955	1.67964	1.7265	1.85611
ENSMUSG00000025959.14	chr1:64068606-64161441	Klf7	protein_coding	MGI:1935151	ncRNA_host	2	567.047	0.393686	0.162109	2.42852	0.0151606	0.0986901	1.71256	1.23053	1.89233	2.17026	1.80003	2.36565
ENSMUSG00000023348.12	chr5:137307916-137312666	Trip6	protein_coding	MGI:1343458	NA	2	106.544	0.587839	0.242189	2.4272	0.015216	0.098996	0.861041	1.12367	1.7244	1.96405	1.32136	2.13565
ENSMUSG00000020056.17	chr10:88036955-88082020	Washc3	protein_coding	MGI:1914532	NA	2	398.804	0.365453	0.150584	2.4269	0.0152285	0.099023	7.40585	5.34351	6.99192	9.11929	7.92434	8.33088
ENSMUSG00000039768.17	chr4:152018148-152066594	Dnajc11	protein_coding	MGI:2443386	NA	2	1252.33	0.247271	0.101912	2.42632	0.0152526	0.0991252	11.1351	10.1953	9.45486	12.5782	12.9434	11.0358
ENSMUSG00000019857.8	chr10:53472853-53485321	Asf1a	protein_coding	MGI:1913653	NA	2	394.523	-0.312942	0.128996	-2.42598	0.0152671	0.0991645	6.81892	6.11075	5.7946	5.54921	5.2402	4.34146
ENSMUSG00000047766.16	chr9:60476142-60595441	Lrrc49	protein_coding	MGI:2442689	NA	2	70.3686	0.600947	0.247734	2.42578	0.0152756	0.0991654	0.291035	0.372365	0.551933	0.64759	0.474915	0.68232
ENSMUSG00000034321.15	chr19:41910731-41921862	Exosc1	protein_coding	MGI:1913833	NA	2	273.539	-0.386826	0.159508	-2.42512	0.0153034	0.0992517	5.46445	4.04627	4.89188	3.48666	3.61736	3.89234
ENSMUSG00000039844.21	chr2:29509732-29630990	Rapgef1	protein_coding	MGI:104580	NA	2	8175.93	-0.193116	0.0796332	-2.42506	0.0153057	0.0992517	41.0174	44.5565	39.3795	37.2167	36.1403	35.9171
ENSMUSG00000036138.17	chr9:119168742-119179365	Acaa1a	protein_coding	MGI:2148491	NA	2	798.512	0.388443	0.160257	2.42387	0.0153559	0.0995224	13.4187	10.7407	15.36	20.3544	16.5343	15.0337
ENSMUSG00000102070.2	chr1:24653966-24654646	Gm28661	unprocessed_pseudogene	MGI:5579367	NA	2	2435.05	0.360698	0.148885	2.42267	0.0154071	0.0997825	158.025	140.854	64.1527	166.297	166.123	110.016
ENSMUSG00000027499.13	chr3:7431729-7510426	Pkia	protein_coding	MGI:104747	overlapping_locus	2	14726.3	-0.249943	0.103174	-2.42253	0.0154129	0.0997825	165.973	139.578	150.963	135.867	132.895	114.652
ENSMUSG00000026933.18	chr2:25816850-25873294	Camsap1	protein_coding	MGI:3036242	NA	1	1290.55	-0.24231	0.100042	-2.42208	0.0154321	0.0998521	6.43315	6.11356	5.32791	5.2304	4.92037	4.91666
ENSMUSG00000024668.9	chr19:10477898-10503506	Sdhaf2	protein_coding	MGI:1913322	NA	2	1126.38	0.26006	0.107441	2.42049	0.0154995	0.100233	5.27349	5.34288	5.52557	6.96802	6.74062	5.71601
ENSMUSG00000030278.12	chr6:113401595-113412721	Cidec	protein_coding	MGI:95585	NA	2	165.514	-2.68496	1.11084	-2.41706	0.0156464	0.101125	0.815501	0.0937541	10.3045	0.088239	0	4.65448
ENSMUSG00000035949.16	chr2:34694526-34716323	Fbxw2	protein_coding	MGI:1353435	NA	2	1233.17	-0.182645	0.0755708	-2.41687	0.0156545	0.101125	7.61973	7.30801	6.57733	6.39253	6.48627	6.03669
ENSMUSG00000090946.4	chr12:32428703-32432942	Ccdc71l	protein_coding	MGI:1919373	NA	2	218.343	-0.437367	0.181073	-2.41542	0.0157172	0.101446	2.04665	2.55471	2.03306	1.61261	1.49255	1.81756
ENSMUSG00000036019.9	chr10:105023524-105410296	Tmtc2	protein_coding	MGI:1914057	overlapping_locus	2	69.4715	0.843385	0.349182	2.41532	0.0157215	0.101446	0.196855	0.261676	0.447051	0.765474	0.436093	0.378895
ENSMUSG00000016487.16	chr6:146789985-146933523	Ppfibp1	protein_coding	MGI:1914783	NA	2	1404.02	-0.566493	0.234579	-2.41493	0.0157382	0.101498	13.0792	12.7236	7.31031	7.52249	8.26186	6.23138
ENSMUSG00000031304.19	chrX:100307984-100311861	Il2rg	protein_coding	MGI:96551	overlapping_locus	2	42.3387	1.02502	0.424492	2.4147	0.0157481	0.101498	0.197852	0.682383	1.15971	1.65148	0.933748	1.06193
ENSMUSG00000026496.12	chr1:180396489-180428819	Parp1	protein_coding	MGI:1340806	ncRNA_host	2	2000.9	-0.199867	0.0827767	-2.41453	0.0157553	0.101498	21.5293	19.0604	18.2802	15.9053	17.8211	17.3665
ENSMUSG00000023411.13	chr14:56060601-56071400	Nfatc4	protein_coding	MGI:1920431	NA	2	122.55	0.575632	0.238564	2.4129	0.0158261	0.101899	0.51629	0.672923	1.22793	1.18873	0.799506	1.47164
ENSMUSG00000033044.13	chr11:67689013-67706828	Dhrs7c	protein_coding	MGI:1915710	NA	2	4544.92	-0.352075	0.145966	-2.41204	0.0158637	0.102084	79.8851	97.3404	106.616	72.8334	90.1578	59.9637
ENSMUSG00000079557.12	chr17:33904666-33937644	Marchf2	protein_coding	MGI:1925915	overlapping_locus	2	1740.6	-0.179162	0.0742948	-2.41151	0.0158868	0.10215	11.2649	10.4022	10.3556	9.34648	9.77962	9.13529
ENSMUSG00000003948.18	chr11:90140282-90169415	Mmd	protein_coding	MGI:1914718	overlapping_locus	2	302.469	-0.584676	0.242463	-2.41141	0.0158912	0.10215	4.17031	2.28382	5.18541	2.05801	2.04357	3.47972
ENSMUSG00000025857.11	chr5:139135978-139172265	Dnaaf5	protein_coding	MGI:3616079	NA	2	498.515	-0.263585	0.109333	-2.41085	0.0159156	0.102251	6.41781	5.97934	5.28427	4.85862	5.21745	4.59839
ENSMUSG00000020755.10	chr11:115824108-115857551	Sap30bp	protein_coding	MGI:1927479	NA	2	360.681	-0.315518	0.13092	-2.41001	0.0159521	0.10243	4.62616	4.18829	3.4663	2.98128	3.49064	3.29349
ENSMUSG00000060036.15	chr15:79961992-79976069	Rpl3	protein_coding	MGI:1351605	ncRNA_host	2	716.371	0.458997	0.190501	2.40942	0.015978	0.102541	9.82306	7.64636	15.7408	13.2195	15.0144	15.9658
ENSMUSG00000020794.14	chr11:72498109-72577307	Ube2g1	protein_coding	MGI:1914378	ncRNA_host	2	2960.85	-0.171835	0.0713312	-2.40898	0.0159972	0.102608	29.776	30.6096	28.1301	26.5488	26.9107	25.1062
ENSMUSG00000027860.16	chr3:102060899-102112009	Vangl1	protein_coding	MGI:2159344	NA	1	59.3471	0.705231	0.292805	2.40853	0.0160168	0.102678	0.200634	0.203886	0.250123	0.337266	0.32179	0.406029
ENSMUSG00000039781.15	chr11:119955256-119977653	Cep131	protein_coding	MGI:107440	ncRNA_host	2	245.153	-0.415209	0.172436	-2.4079	0.0160445	0.102769	2.65885	2.74653	2.45046	1.77316	2.03831	2.05109
ENSMUSG00000046413.15	chr8:92527043-92534167	Irx3os	lncRNA	MGI:2441953	NA	2	95.8779	-2.60132	1.08037	-2.40781	0.0160485	0.102769	3.35897	2.62763	0.0912387	0.131897	0.0769049	1.40982
ENSMUSG00000073436.12	chr17:25107460-25114061	Eme2	protein_coding	MGI:1919889	overlapping_locus	2	129.065	0.519659	0.21588	2.40717	0.0160768	0.102895	0.722649	0.688684	0.890916	1.16517	1.11416	1.01317
ENSMUSG00000038708.11	chr9:118335335-118411587	Golga4	protein_coding	MGI:1859646	NA	2	21254.9	-0.19011	0.0790135	-2.40604	0.0161266	0.103158	105.426	114.301	89.856	94.1073	89.5308	86.8406
ENSMUSG00000028776.15	chr4:130058247-130068915	Tinagl1	protein_coding	MGI:2137617	NA	2	1091.98	0.496801	0.206619	2.40444	0.0161975	0.103555	3.41377	4.0045	5.52624	6.49632	4.17313	7.46505
ENSMUSG00000050732.10	chr6:72362206-72367686	Vamp8	protein_coding	MGI:1336882	NA	2	432.901	0.292342	0.121611	2.40391	0.0162209	0.103649	6.00363	4.68714	6.83177	5.93504	6.08529	9.77549
ENSMUSG00000020099.9	chr10:60598372-60667360	Unc5b	protein_coding	MGI:894703	overlapping_locus	2	178.117	0.664615	0.27653	2.40341	0.0162429	0.103733	1.31411	0.7438	0.923248	2.27679	1.38163	1.14208
ENSMUSG00000028607.17	chr4:107761178-107780807	Cpt2	protein_coding	MGI:109176	NA	1	1823.73	0.406865	0.169312	2.40305	0.0162588	0.103778	23.2906	23.75	27.0802	34.5046	37.571	27.1181
ENSMUSG00000006299.14	chr1:74318999-74323897	Aamp	protein_coding	MGI:107809	NA	2	1934.05	-0.236161	0.0982947	-2.40258	0.0162797	0.103856	36.473	35.8449	35.7374	29.0243	33.4098	29.3164
ENSMUSG00000101257.2	chr1:80202761-80206509	2310015K22Rik	lncRNA	MGI:1916815	NA	2	41.4221	-1.40463	0.58484	-2.40173	0.0163176	0.10399	2.31369	1.07192	1.88214	0.644549	1.08735	0.382848
ENSMUSG00000034218.17	chr9:53350449-53448040	Atm	protein_coding	MGI:107202	NA	2	338.039	-0.399567	0.166377	-2.40158	0.0163245	0.10399	1.44892	1.17177	1.41052	0.96093	0.765965	1.41248
ENSMUSG00000029062.15	chr4:155709311-155734395	Cdk11b	protein_coding	MGI:88353	NA	2	1776.15	-0.190401	0.0792837	-2.40152	0.0163273	0.10399	19.7668	20.6263	16.3048	16.7722	17.2693	15.4379
ENSMUSG00000029458.15	chr5:121798626-121825319	Brap	protein_coding	MGI:1919649	NA	1	1032.91	-0.174903	0.0728362	-2.40132	0.0163363	0.103992	8.75496	8.52674	7.65278	7.62949	7.75266	6.70452
ENSMUSG00000029330.9	chr5:101912996-101971724	Cds1	protein_coding	MGI:1921846	NA	2	78.5616	0.785036	0.326973	2.40092	0.0163538	0.104047	0.97716	0.277153	0.401563	0.719944	0.8296	0.974047
ENSMUSG00000058325.7	chr7:134272416-134775368	Dock1	protein_coding	MGI:2429765	NA	2	223.435	0.43155	0.179826	2.39982	0.0164031	0.104138	0.667818	0.769602	1.04208	1.20895	0.9082	1.17859
ENSMUSG00000110677.2	chr12:103335031-103338726	Gm45777	unitary_pseudogene	MGI:5804892	NA	2	68.8133	-0.614723	0.25616	-2.39977	0.0164055	0.104138	11.0626	9.82767	8.82764	7.61728	5.96995	5.88454
ENSMUSG00000040596.16	chr1:166212191-166237432	Pogk	protein_coding	MGI:1918842	NA	2	636.159	-0.34374	0.143241	-2.39973	0.0164073	0.104138	3.3684	2.65477	2.3851	2.13556	2.5456	1.90933
ENSMUSG00000079071.3	chr2:122315422-122358521	Slc28a2b	protein_coding	MGI:3702173	NA	2	60.1456	0.744005	0.310049	2.39963	0.0164114	0.104138	0.377718	0.558313	0.42958	0.56926	0.912195	0.772708
ENSMUSG00000020077.15	chr10:62329612-62363230	Srgn	protein_coding	MGI:97756	NA	2	265.935	0.39937	0.16644	2.39948	0.0164182	0.104138	2.82588	3.42706	4.09424	4.94074	4.34047	4.3725
ENSMUSG00000025225.16	chr19:46292759-46300824	Nfkb2	protein_coding	MGI:1099800	NA	2	382.016	0.446407	0.186058	2.39929	0.016427	0.104138	1.88779	2.73934	3.05936	3.49364	2.54308	4.40984
ENSMUSG00000026014.16	chr1:60521451-60606263	Raph1	protein_coding	MGI:1924550	overlapping_locus	2	801.73	0.339617	0.141553	2.39923	0.0164298	0.104138	2.44093	2.30767	2.32461	3.02588	2.57204	3.40636
ENSMUSG00000042211.8	chr18:62637226-62681766	Fbxo38	protein_coding	MGI:2444639	NA	2	718.84	-0.210615	0.0878006	-2.39879	0.0164492	0.104205	6.85883	6.79156	6.28276	6.02598	5.57037	5.63501
ENSMUSG00000030399.3	chr7:19138701-19156766	Ckm	protein_coding	MGI:88413	NA	2	513282	-0.380645	0.158721	-2.3982	0.0164759	0.104318	7448.21	6215.29	7535.75	4939.11	5735.61	5615.04
ENSMUSG00000063801.8	chr7:79525073-79570397	Ap3s2	protein_coding	MGI:1337060	NA	2	1111.44	-0.201782	0.0841522	-2.39782	0.0164931	0.104371	8.23642	7.24909	6.81245	7.00293	6.65073	5.76233
ENSMUSG00000096929.8	chr1:194658683-194719237	A330023F24Rik	lncRNA	MGI:2443958	ncRNA_host	2	259.189	0.72098	0.30076	2.39719	0.0165213	0.104493	0.91848	0.893244	2.32837	2.12341	1.26245	3.15744
ENSMUSG00000027806.10	chr3:58322136-58374204	Tsc22d2	protein_coding	MGI:1919283	NA	2	957.512	-0.364347	0.15202	-2.3967	0.0165434	0.104577	4.04308	4.03216	3.39436	2.75474	2.92648	3.25474
ENSMUSG00000106019.2	chr3:22128576-22130306	Gm43672	lncRNA	MGI:5663809	NA	2	242.635	-0.393953	0.16442	-2.39602	0.0165743	0.104716	6.3539	5.37805	4.60506	3.99731	4.52853	3.78782
ENSMUSG00000028959.15	chr5:24643438-24650285	Fastk	protein_coding	MGI:1913837	ncRNA_host	2	5237.71	0.206551	0.0862233	2.39554	0.0165959	0.104797	49.2709	51.6514	52.1555	59.2187	63.2737	54.3781
ENSMUSG00000044452.11	chr7:35471768-35502414	Zfp507	protein_coding	MGI:1916378	NA	2	612.719	-0.24008	0.100232	-2.39524	0.0166094	0.104826	3.56032	3.65636	3.27048	3.05956	2.82018	2.99959
ENSMUSG00000007476.19	chr2:30127727-30153802	Lrrc8a	protein_coding	MGI:2652847	overlapping_locus	2	695.994	0.431774	0.180305	2.39468	0.0166348	0.10493	2.50622	3.68575	3.24889	4.1247	3.25837	5.49646
ENSMUSG00000022141.8	chr15:8320101-8473947	Nipbl	protein_coding	MGI:1913976	NA	2	1443.06	-0.342452	0.143026	-2.39433	0.0166506	0.104974	6.03415	5.91844	5.25274	4.24506	4.02678	5.44455
ENSMUSG00000098557.2	chr14:103214017-103220073	Kctd12	protein_coding	MGI:2145823	ncRNA_host	2	325.899	0.533009	0.222636	2.39408	0.0166619	0.104975	1.1828	1.3646	1.79555	2.44022	1.96493	1.75971
ENSMUSG00000054021.7	chr13:43518972-43548679	Sirt5	protein_coding	MGI:1915596	NA	2	251.596	0.430359	0.17977	2.39394	0.0166686	0.104975	1.96997	2.04058	2.09703	2.8218	3.28947	2.19052
ENSMUSG00000025902.14	chr1:4561154-4567577	Sox17	protein_coding	MGI:107543	NA	2	360.372	0.525987	0.219819	2.39282	0.0167194	0.105238	1.77821	2.05434	2.41281	3.29165	2.77766	2.87766
ENSMUSG00000024592.16	chr18:57088905-57108440	C330018D20Rik	protein_coding	MGI:1924672	NA	2	285.94	0.403183	0.168546	2.39212	0.0167512	0.105293	3.12108	2.422	3.38306	4.14115	3.60878	4.08495
ENSMUSG00000106847.2	chr15:72677449-72682173	Peg13	lncRNA	MGI:2663476	NA	2	934.131	-0.231891	0.0969452	-2.39198	0.0167577	0.105293	7.12205	7.29175	8.08873	6.49887	6.18413	6.48454
ENSMUSG00000094724.9	chr17:7238033-7278698	Rnaset2b	protein_coding	MGI:3702087	NA	2	125.058	-1.02348	0.4279	-2.39188	0.0167623	0.105293	1.09587	3.05276	0.955037	0.912123	0.834008	0.744195
ENSMUSG00000026662.14	chr2:4886375-4915368	Sephs1	protein_coding	MGI:1923580	NA	2	629.651	-0.305603	0.127768	-2.39185	0.0167637	0.105293	4.95582	4.06018	4.30729	3.37217	3.98664	3.40377
ENSMUSG00000019558.15	chrX:72716756-72726108	Slc6a8	protein_coding	MGI:2147834	NA	2	4262.04	0.224901	0.0940361	2.39164	0.0167731	0.105296	37.6917	35.6262	34.5104	46.39	43.7791	36.2384
ENSMUSG00000032121.10	chr9:37119519-37135996	Tmem218	protein_coding	MGI:1913529	NA	2	124.939	0.543397	0.227254	2.39114	0.0167959	0.105383	1.13657	1.99321	1.17971	2.31369	2.23735	1.68483
ENSMUSG00000032244.10	chr9:62699103-62719216	Fem1b	protein_coding	MGI:1335087	NA	2	601.846	-0.278425	0.116472	-2.39049	0.0168258	0.105514	3.87408	3.48785	3.00088	2.72752	2.76741	3.00898
ENSMUSG00000019818.16	chr10:41395410-41407044	Cd164	protein_coding	MGI:1859568	NA	2	3302.75	-0.208801	0.0874418	-2.38789	0.0169454	0.106208	45.4557	33.4187	39.7788	31.3419	30.8876	40.6344
ENSMUSG00000026442.15	chr1:132492428-132669535	Nfasc	protein_coding	MGI:104753	NA	2	29.4662	1.33451	0.558952	2.38752	0.0169623	0.106258	0.0138732	0.0318987	0.104783	0.0637974	0.0549023	0.26204
ENSMUSG00000026047.14	chr1:44145706-44157968	Poglut2	protein_coding	MGI:1919300	overlapping_locus	2	113.958	0.630669	0.264274	2.38642	0.0170134	0.106521	1.1225	1.00243	1.84128	2.03332	1.7693	2.33336
ENSMUSG00000009630.11	chr8:34089653-34109469	Ppp2cb	protein_coding	MGI:1321161	NA	2	695.888	-0.253439	0.106227	-2.38583	0.0170404	0.106634	21.4311	17.9456	15.1224	13.7127	15.9377	15.5267
ENSMUSG00000011256.17	chr11:45946819-46038170	Adam19	protein_coding	MGI:105377	ncRNA_host	2	102.662	0.749181	0.314075	2.38536	0.0170625	0.106704	0.481627	0.606944	0.562666	1.35294	0.841448	0.616104
ENSMUSG00000034602.16	chr10:122827965-122912410	Mon2	protein_coding	MGI:1914324	NA	2	1493.5	-0.228941	0.0959868	-2.38513	0.0170732	0.106704	6.25248	5.41359	5.87111	4.92177	4.81159	5.21813
ENSMUSG00000056749.8	chr13:53121245-53135109	Nfil3	protein_coding	MGI:109495	NA	2	1250.57	0.610837	0.256115	2.38501	0.0170787	0.106704	7.02249	11.7021	7.1828	10.5085	11.4917	19.0343
ENSMUSG00000025407.8	chr10:127165751-127177843	Gli1	protein_coding	MGI:95727	NA	2	46.7678	0.95406	0.400124	2.38441	0.0171064	0.10682	0.167417	0.340261	0.454041	0.640491	0.456783	0.633422
ENSMUSG00000029270.11	chr5:108055919-108134951	Dipk1a	protein_coding	MGI:1914516	NA	2	494.606	-0.468478	0.196561	-2.38338	0.0171545	0.107064	8.12959	4.75332	8.09811	4.64359	3.90822	6.6404
ENSMUSG00000029064.16	chr4:155575818-155643726	Gnb1	protein_coding	MGI:95781	NA	2	1277.4	0.253621	0.106463	2.38224	0.0172079	0.10734	10.6681	11.714	12.0885	14.6528	13.0364	13.3649
ENSMUSG00000022357.3	chr15:58177969-58187565	Klhl38	protein_coding	MGI:3045310	NA	2	1490.91	-0.616572	0.258889	-2.38161	0.0172372	0.107431	16.7414	28.8308	35.3385	25.5245	18.861	10.3535
ENSMUSG00000020024.8	chr10:94524516-94626715	Cep83	protein_coding	MGI:1924298	NA	2	583.398	-0.23563	0.098941	-2.38152	0.0172415	0.107431	6.94614	6.64151	5.07926	5.35785	5.893	4.50699
ENSMUSG00000048264.17	chr13:9326564-9718964	Dip2c	protein_coding	MGI:1920179	NA	2	652.529	-0.302751	0.127135	-2.38134	0.0172498	0.107431	3.0204	3.35971	2.72386	2.37156	2.60586	2.38106
ENSMUSG00000022940.18	chr16:94159622-94172701	Pigp	protein_coding	MGI:1860433	overlapping_locus	1	1325.15	-0.247725	0.104106	-2.37954	0.0173342	0.107892	25.2896	25.5056	27.5381	20.0903	23.5132	22.2698
ENSMUSG00000033149.18	chr16:45566606-45773961	Phldb2	protein_coding	MGI:2444981	NA	1	268.777	0.423617	0.178061	2.37906	0.017357	0.107892	1.31115	0.979011	1.64727	1.78251	1.71642	1.71503
ENSMUSG00000047879.18	chr18:9993066-10045105	Usp14	protein_coding	MGI:1928898	NA	2	1246.57	-0.196332	0.0825269	-2.379	0.0173596	0.107892	10.5885	9.75976	9.58473	8.98523	8.44545	8.70187
ENSMUSG00000014859.10	chr8:106024295-106032002	E2f4	protein_coding	MGI:103012	NA	2	818.563	-0.232618	0.0977804	-2.37899	0.0173604	0.107892	15.0759	16.5315	12.4038	12.3464	13.1165	11.7805
ENSMUSG00000038658.16	chr19:29499682-29584229	Ric1	protein_coding	MGI:1924893	NA	2	1003.5	-0.282572	0.118798	-2.37859	0.0173789	0.10795	6.6802	5.60261	4.98903	4.83456	5.12888	4.1447
ENSMUSG00000029674.14	chr5:134684893-134717452	Limk1	protein_coding	MGI:104572	NA	2	64.899	0.683802	0.287671	2.37703	0.0174529	0.108313	0.489341	0.389472	0.407244	0.76367	0.556996	0.741893
ENSMUSG00000055632.19	chr2:31204427-31350750	Hmcn2	protein_coding	MGI:2677838	NA	1	1633.33	0.554092	0.233109	2.37697	0.0174556	0.108313	2.08967	2.91207	4.28328	4.96034	2.99352	5.26633
ENSMUSG00000025531.15	chrX:111950290-112095214	Chm	protein_coding	MGI:892979	ncRNA_host	1	667.763	-0.284867	0.119855	-2.37678	0.0174647	0.108313	3.60161	3.76631	4.47957	3.14016	3.19581	3.37786
ENSMUSG00000020782.19	chr11:115714875-115746606	Llgl2	protein_coding	MGI:1918843	NA	2	245.605	-0.370298	0.155885	-2.37546	0.017527	0.108642	2.03209	2.26806	2.25382	1.70405	1.84147	1.52974
ENSMUSG00000021294.8	chr12:112112642-112148181	Kif26a	protein_coding	MGI:2447072	NA	2	229.441	0.470346	0.198053	2.37485	0.0175561	0.108765	1.51692	1.21363	1.26838	2.05957	1.9086	1.5946
ENSMUSG00000028028.12	chr3:127463959-127574176	Alpk1	protein_coding	MGI:1918731	overlapping_locus	1	47.3318	0.905234	0.381248	2.3744	0.0175776	0.108841	0.200367	0.120935	0.306759	0.439022	0.27408	0.444274
ENSMUSG00000028047.12	chr3:89122487-89134144	Thbs3	protein_coding	MGI:98739	NA	2	108.511	0.651018	0.274304	2.37335	0.0176277	0.109048	0.602462	0.652662	1.56092	1.34136	0.77347	2.24543
ENSMUSG00000059981.13	chr7:126464850-126483875	Taok2	protein_coding	MGI:1915919	NA	2	1259.13	0.19131	0.0806091	2.37331	0.0176296	0.109048	6.72145	7.08987	6.4168	7.32173	8.14617	7.57812
ENSMUSG00000026511.8	chr1:181952302-181959972	Srp9	protein_coding	MGI:1350930	NA	2	776.061	-0.50418	0.212526	-2.37232	0.0176765	0.109282	20.3272	29.348	19.0082	17.6826	14.8519	15.875
ENSMUSG00000022359.11	chr15:58004773-58022061	Wdyhv1	protein_coding	MGI:1924023	ncRNA_host	2	84.843	0.643952	0.271499	2.37184	0.0176997	0.109367	1.30504	1.31679	1.56439	2.38852	1.99227	2.15486
ENSMUSG00000030768.13	chr1:182867830-183003086	Disp1	protein_coding	MGI:1916147	overlapping_locus	2	61.9733	0.687224	0.289815	2.37125	0.0177278	0.109484	0.336151	0.264268	0.538861	0.489421	0.530757	0.761182
ENSMUSG00000025572.19	chr11:117656814-117673024	Tmc6	protein_coding	MGI:1098686	NA	2	130.016	0.823086	0.347172	2.37083	0.0177481	0.109552	1.01278	0.608981	1.11803	2.45484	1.1625	1.32145
ENSMUSG00000005813.13	chr3:138164717-138195276	Metap1	protein_coding	MGI:1922874	NA	2	1579.5	-0.177439	0.0748552	-2.37043	0.0177675	0.109614	10.535	9.79623	8.83466	8.29536	8.49042	8.92502
ENSMUSG00000026361.10	chr1:143474538-143578631	Cdc73	protein_coding	MGI:2384876	NA	2	1156.77	-0.264593	0.111664	-2.36955	0.0178099	0.109798	4.13661	3.76188	3.32118	2.87056	2.90759	3.5881
ENSMUSG00000027107.4	chr2:73393559-73410682	Chrna1	protein_coding	MGI:87885	NA	2	387.197	0.360841	0.152294	2.36937	0.0178186	0.109798	1.69095	1.42824	4.64226	2.23104	2.41071	4.54852
ENSMUSG00000024248.15	chr17:83809347-83824759	Cox7a2l	protein_coding	MGI:106015	NA	2	1802.31	0.175857	0.0742253	2.36923	0.0178251	0.109798	49.8217	51.586	51.8035	60.4249	59.3776	53.6553
ENSMUSG00000049044.17	chr2:71811584-72087818	Rapgef4	protein_coding	MGI:1917723	NA	2	63.9452	0.933274	0.394019	2.3686	0.0178554	0.109927	0.13601	0.293183	0.235994	0.484423	0.339333	0.428164
ENSMUSG00000021936.15	chr14:33099855-33169115	Mapk8	protein_coding	MGI:1346861	NA	2	969.997	-0.239251	0.101041	-2.36786	0.0178915	0.110092	6.76968	7.34486	5.96411	5.78174	6.60454	4.68143
ENSMUSG00000042607.16	chr6:5383386-5433022	Asb4	protein_coding	MGI:1929751	NA	2	344.697	-0.810319	0.342345	-2.36697	0.0179346	0.110216	4.41394	6.45005	2.90737	2.14502	3.70242	1.90462
ENSMUSG00000007029.17	chr17:35219963-35235298	Vars	protein_coding	MGI:90675	NA	1	1350.42	-0.203673	0.0860505	-2.36691	0.0179375	0.110216	10.8063	10.6388	12.3181	9.11286	9.64505	10.5436
ENSMUSG00000031232.18	chrX:105011690-105055512	Magt1	protein_coding	MGI:1914325	NA	2	985.197	-0.22253	0.094019	-2.36686	0.0179397	0.110216	7.57001	9.44155	8.39873	7.53658	7.22978	6.96382
ENSMUSG00000027809.15	chr3:79511095-79536170	Etfdh	protein_coding	MGI:106100	NA	1	4634.72	0.429041	0.181368	2.36559	0.0180016	0.110516	52.1347	58.3837	65.3207	78.4324	93.3924	66.2329
ENSMUSG00000020523.15	chr11:57373819-57409443	Fam114a2	protein_coding	MGI:1917629	NA	2	1198.95	-0.186179	0.0787069	-2.36547	0.0180073	0.110516	16.4565	16.4105	13.2228	15.4984	14.3722	10.8735
ENSMUSG00000021051.11	chr12:75497655-75643019	Ppp2r5e	protein_coding	MGI:1349473	overlapping_locus	2	1249.84	-0.191262	0.080865	-2.3652	0.0180203	0.110538	9.89342	10.7693	9.38341	9.57777	8.84163	7.93297
ENSMUSG00000027583.14	chr2:181029555-181101219	Zbtb46	protein_coding	MGI:1919397	ncRNA_host	2	260.097	0.467596	0.197749	2.3646	0.0180497	0.110593	1.07846	1.0936	1.15345	1.83667	1.28587	1.49221
ENSMUSG00000015714.12	chr3:95222102-95230910	Cers2	protein_coding	MGI:1924143	NA	2	576.374	0.25069	0.106018	2.36459	0.0180499	0.110593	6.90995	8.34122	8.20098	9.44593	9.56511	8.83561
ENSMUSG00000028953.11	chr5:24770343-24782465	Abcf2	protein_coding	MGI:1351657	NA	2	3304.8	-0.218945	0.0925993	-2.36444	0.0180574	0.110593	50.3934	48.8867	50.4282	40.3851	44.0873	44.1139
ENSMUSG00000075419.5	chr2:30174243-30176346	Dolk	protein_coding	MGI:2677836	NA	2	582.201	-0.257826	0.109058	-2.36411	0.0180733	0.110634	11.3901	11.3717	10.3674	9.6714	10.3478	7.81293
ENSMUSG00000002968.10	chr7:44526189-44542136	Med25	protein_coding	MGI:1922863	NA	2	1839.02	-0.233014	0.0985835	-2.36362	0.0180976	0.11067	14.4235	13.5992	14.9254	12.402	12.8641	11.3446
ENSMUSG00000001946.15	chr9:37439374-37449615	Esam	protein_coding	MGI:1916774	NA	1	726.118	0.362177	0.153231	2.36361	0.0180981	0.11067	7.15025	8.25483	9.22364	11.7514	10.4109	9.42473
ENSMUSG00000019841.16	chr10:39608114-39751207	Rev3l	protein_coding	MGI:1337131	ncRNA_host	2	1054.35	-0.396498	0.167828	-2.36253	0.0181508	0.110896	4.03416	3.31976	3.28461	2.32936	2.31033	3.58682
ENSMUSG00000014778.11	chr8:106055795-106074585	Fhod1	protein_coding	MGI:2679008	NA	2	1428.99	-0.396308	0.167752	-2.36247	0.0181538	0.110896	16.1324	20.7985	11.7515	13.592	10.9528	11.7558
ENSMUSG00000019797.12	chr10:43401129-43416990	Mtres1	protein_coding	MGI:1915101	NA	1	1004.99	0.301309	0.127647	2.36048	0.0182511	0.111433	9.10116	8.32009	6.75236	10.0157	10.8863	8.76479
ENSMUSG00000035392.18	chr2:37689003-38177402	Dennd1a	protein_coding	MGI:2442794	ncRNA_host	2	777.677	-0.225229	0.0954559	-2.35951	0.0182991	0.111668	6.60134	6.3761	6.20904	5.50914	5.8309	5.07048
ENSMUSG00000000628.11	chr6:82702006-82751435	Hk2	protein_coding	MGI:1315197	NA	1	14319	0.498668	0.211396	2.35893	0.0183276	0.111784	66.4696	59.2221	66.3433	118.953	68.5778	81.9317
ENSMUSG00000021756.13	chr13:112600604-112646620	Il6st	protein_coding	MGI:96560	NA	1	4825.43	-0.219099	0.0929213	-2.3579	0.0183785	0.111941	15.0598	19.413	17.5292	14.7592	17.1124	12.8061
ENSMUSG00000017831.9	chr17:53786262-53814708	Rab5a	protein_coding	MGI:105926	NA	2	1435.54	-0.203115	0.0861484	-2.35773	0.018387	0.111941	23.5416	24.9502	22.4347	21.0425	21.684	18.8995
ENSMUSG00000021983.17	chr14:59875989-60434628	Atp8a2	protein_coding	MGI:1354710	overlapping_locus	2	74.132	0.631934	0.268064	2.3574	0.0184032	0.111941	0.160426	0.084689	0.128319	0.140816	0.13689	0.340791
ENSMUSG00000020527.15	chr11:84770974-84802052	Myo19	protein_coding	MGI:1913446	ncRNA_host	2	104.608	0.621552	0.26367	2.35731	0.0184078	0.111941	0.468136	0.464803	0.425683	0.610143	0.713953	0.764521
ENSMUSG00000027523.21	chr2:174126113-174188537	Gnas	protein_coding	MGI:95777	ncRNA_host	2	25178.4	-0.175776	0.0745713	-2.35716	0.0184155	0.111941	81.3537	92.6418	82.4085	78.961	79.2471	69.0073
ENSMUSG00000087380.8	chr6:31197286-31314339	2210408F21Rik	lncRNA	MGI:1920902	overlapping_locus	2	525.441	-0.278752	0.11827	-2.35691	0.0184276	0.111941	9.2475	9.60079	7.97459	7.31731	7.5444	7.19388
ENSMUSG00000054226.14	chr6:85888847-85907266	Tprkb	protein_coding	MGI:1917036	NA	2	464.711	-0.32173	0.136515	-2.35675	0.0184359	0.111941	5.18875	4.34702	4.72503	3.93203	4.34997	3.17318
ENSMUSG00000003199.17	chr17:56312711-56323790	Mpnd	protein_coding	MGI:1915297	NA	1	796.083	0.220586	0.0936014	2.35665	0.0184404	0.111941	14.6761	12.6543	15.1768	14.2657	15.2205	20.4459
ENSMUSG00000020585.5	chr12:8971664-8988742	Laptm4a	protein_coding	MGI:108017	NA	2	6567.3	-0.166048	0.0704604	-2.35661	0.0184425	0.111941	141.284	149.104	140.246	143.82	138.498	105.229
ENSMUSG00000041859.11	chr1:20873192-20890536	Mcm3	protein_coding	MGI:101845	NA	2	90.6976	0.573843	0.243515	2.3565	0.0184481	0.111941	0.865563	0.789378	1.14168	1.3373	1.23727	1.58909
ENSMUSG00000036281.14	chr2:26252777-26270665	Snapc4	protein_coding	MGI:2443935	NA	2	206.282	0.351645	0.149312	2.35511	0.0185174	0.112303	1.02855	1.04452	1.24109	1.31695	1.50232	1.37963
ENSMUSG00000046658.17	chr5:143235452-143255777	Zfp316	protein_coding	MGI:1860402	NA	2	285.109	-0.305101	0.129605	-2.35408	0.0185685	0.112556	1.7718	1.59715	1.57824	1.28931	1.42856	1.27166
ENSMUSG00000025968.17	chr1:63182755-63215992	Ndufs1	protein_coding	MGI:2443241	NA	1	12801.7	0.170432	0.072419	2.35341	0.018602	0.112701	144.208	161.666	128.649	174.841	184.522	132.355
ENSMUSG00000028937.15	chr4:152262591-152356312	Acot7	protein_coding	MGI:1917275	overlapping_locus	2	456.13	0.271131	0.115274	2.35205	0.0186701	0.113055	5.62957	6.04193	8.27695	7.49849	6.91532	9.68517
ENSMUSG00000020486.20	chr11:87457479-87481365	Septin4	protein_coding	MGI:1270156	overlapping_locus	1	235.219	0.575401	0.244753	2.35094	0.0187258	0.113334	2.38497	2.4502	1.73245	4.13856	4.26298	1.92995
ENSMUSG00000033799.11	chr13:3616035-3661108	Tasor2	protein_coding	MGI:2145274	NA	2	379.843	-0.364935	0.155317	-2.34961	0.0187928	0.113557	1.85912	1.79824	1.68222	1.32495	1.29184	1.5451
ENSMUSG00000034037.15	chr6:91955859-92052985	Fgd5	protein_coding	MGI:2443369	overlapping_locus	2	411.308	0.446288	0.189943	2.34959	0.0187941	0.113557	2.47502	2.4481	2.44335	3.41247	3.13625	3.47708
ENSMUSG00000051427.15	chr11:4091123-4110293	Ccdc157	protein_coding	MGI:3041210	NA	2	224.849	0.385824	0.164219	2.34945	0.018801	0.113557	1.33601	1.15974	1.42626	1.56036	1.88716	1.66242
ENSMUSG00000021196.15	chr13:6629804-6698813	Pfkp	protein_coding	MGI:1891833	NA	2	148.672	0.586446	0.249623	2.34933	0.0188074	0.113557	0.598292	0.975463	1.16579	1.61547	1.26901	1.1725
ENSMUSG00000019943.11	chr10:98750268-98862005	Atp2b1	protein_coding	MGI:104653	NA	2	2645.75	-0.235074	0.100063	-2.34926	0.0188108	0.113557	11.0293	12.2158	10.0577	9.87888	9.47112	8.94005
ENSMUSG00000002910.12	chr8:71287773-71292364	Arrdc2	protein_coding	MGI:1918057	NA	2	1761.54	-2.03643	0.867249	-2.34815	0.0188671	0.11384	2.48407	17.9473	21.5989	2.03324	1.7465	6.22545
ENSMUSG00000032553.15	chr9:103065231-103079336	Srprb	protein_coding	MGI:102964	overlapping_locus	2	708.297	-0.232822	0.0991797	-2.34747	0.0189012	0.113987	9.22021	8.99606	8.82622	7.60049	8.40818	7.01393
ENSMUSG00000038371.16	chr7:109907220-110214129	Sbf2	protein_coding	MGI:1921831	overlapping_locus	2	421.636	0.345481	0.147198	2.34705	0.0189225	0.114057	1.41315	1.82185	1.84315	2.32116	1.92533	2.19689
ENSMUSG00000033434.16	chr5:110251841-110256063	Gtpbp6	protein_coding	MGI:1306825	NA	2	281.262	0.366686	0.156281	2.34632	0.0189599	0.114188	4.0807	3.88105	5.10402	5.21821	5.27239	6.24536
ENSMUSG00000029076.15	chr4:156077329-156098067	Sdf4	protein_coding	MGI:108079	NA	1	1954.53	-0.203047	0.0865412	-2.34625	0.0189636	0.114188	13.6336	14.4337	12.7677	11.9792	12.3699	11.1154
ENSMUSG00000067369.13	chrX:133123088-133177733	Trmt2b	protein_coding	MGI:2442530	NA	2	523.636	0.36135	0.15406	2.34551	0.019001	0.114337	4.30773	3.60733	3.667	5.47248	4.86629	4.57019
ENSMUSG00000023951.19	chr17:46327919-46343295	Vegfa	protein_coding	MGI:103178	NA	2	7374.57	0.512706	0.218602	2.34538	0.0190077	0.114337	66.0048	79.2987	44.3148	118.912	91.1609	62.3695
ENSMUSG00000029822.16	chr6:50270310-50433181	Osbpl3	protein_coding	MGI:1918970	overlapping_locus	2	356.869	-0.763223	0.325542	-2.34447	0.0190542	0.114558	1.32558	2.47065	1.99664	2.12973	0.974532	0.564916
ENSMUSG00000034252.15	chr9:79974185-80052235	Senp6	protein_coding	MGI:1922075	NA	1	1501.75	-0.238298	0.101672	-2.34379	0.0190887	0.114707	9.69561	10.4012	8.45293	8.11933	8.02745	8.02753
ENSMUSG00000037742.15	chr9:78385731-78396433	Eef1a1	protein_coding	MGI:1096881	ncRNA_host	2	6662.15	0.268997	0.114863	2.34189	0.0191862	0.115234	74.5944	87.4239	136.104	114.545	104.385	130.255
ENSMUSG00000052609.10	chr12:76577665-76625816	Plekhg3	protein_coding	MGI:2388284	NA	2	227.953	0.466786	0.199401	2.34094	0.0192351	0.115389	1.02647	0.944562	1.43681	1.862	1.28678	1.50883
ENSMUSG00000095690.3	chr19:7375789-7376442	Rab11b-ps2	processed_pseudogene	MGI:3643959	retrogene	2	43.29	-0.963814	0.411769	-2.34067	0.0192494	0.115389	2.00575	4.32358	3.11802	1.5651	1.19462	2.09064
ENSMUSG00000067928.7	chr17:21926723-21944617	Zfp760	protein_coding	MGI:2679257	NA	2	37.8639	0.839506	0.358665	2.34064	0.0192505	0.115389	0.239735	0.196374	0.330329	0.505828	0.365057	0.494652
ENSMUSG00000034255.19	chr11:103222323-103254290	Arhgap27	protein_coding	MGI:1916903	NA	2	241.429	0.703925	0.300742	2.34063	0.0192511	0.115389	0.742377	1.24652	1.28014	1.89455	1.57316	1.76881
ENSMUSG00000061273.4	chrX:55630872-55643429	Mmgt1	protein_coding	MGI:2384305	ncRNA_host	2	1294.46	-0.185449	0.0792804	-2.33916	0.0193274	0.115788	12.2139	12.1957	12.2084	10.9852	11.7297	9.59243
ENSMUSG00000031807.11	chr8:72044820-72053736	Pgls	protein_coding	MGI:1913421	overlapping_locus	2	380.983	0.315044	0.134746	2.33806	0.0193843	0.116036	6.3724	5.8839	6.43746	7.34977	7.79601	8.11243
ENSMUSG00000032854.13	chr3:125658920-125732268	Ugt8a	protein_coding	MGI:109522	NA	2	18.3214	2.02841	0.867593	2.33798	0.0193884	0.116036	0.0363489	0	0.126139	0.0393304	0.0938141	0.492535
ENSMUSG00000026639.19	chr1:192890033-193026186	Lamb3	protein_coding	MGI:99915	overlapping_locus	2	127.241	0.718927	0.307554	2.33756	0.0194098	0.116077	0.620952	0.511787	0.883563	1.00041	1.43766	0.883021
ENSMUSG00000038025.9	chr13:48955226-49024595	Phf2	protein_coding	MGI:1338034	NA	2	1932.77	-0.195477	0.083628	-2.33746	0.019415	0.116077	14.0135	13.0015	12.8839	11.6703	11.5519	11.595
ENSMUSG00000022889.8	chr16:84514464-84532630	Mrpl39	protein_coding	MGI:1351620	NA	2	600.218	0.264728	0.113274	2.33707	0.0194357	0.116132	8.97321	8.72314	9.0643	11.1192	11.7613	9.428
ENSMUSG00000030323.14	chr6:115830431-115903660	Ift122	protein_coding	MGI:1932386	NA	1	356.395	-0.773204	0.330866	-2.33691	0.0194439	0.116132	5.7542	2.27981	2.0199	1.94204	1.43885	2.10328
ENSMUSG00000039891.7	chr10:17672004-17721413	Txlnb	protein_coding	MGI:2671945	NA	2	19750.4	-0.221402	0.0947538	-2.3366	0.01946	0.11617	162.629	183.885	169.024	149.161	141.463	152.063
ENSMUSG00000036751.8	chr7:30316286-30325576	Cox6b1	protein_coding	MGI:107460	NA	2	8288.81	0.238024	0.101906	2.33572	0.0195058	0.116373	394.811	462	416.467	518.965	517.267	462.072
ENSMUSG00000028228.6	chr4:19519254-19570108	Cpne3	protein_coding	MGI:1917818	NA	2	374.12	-0.295892	0.12669	-2.33557	0.0195139	0.116373	2.8698	2.43889	2.37356	1.82697	2.15392	2.245
ENSMUSG00000034210.15	chr4:115594941-115634524	Efcab14	protein_coding	MGI:2442397	NA	2	1629.15	-0.247648	0.106061	-2.33497	0.0195451	0.116455	8.98188	8.09461	8.09245	7.72329	6.62105	6.86587
ENSMUSG00000031785.17	chr8:95701379-95740845	Adgrg1	protein_coding	MGI:1340051	NA	2	921.553	0.460321	0.197146	2.33493	0.0195472	0.116455	2.57806	4.84626	3.99922	5.48418	4.23202	5.71518
ENSMUSG00000044317.8	chr7:18946463-18958099	Gpr4	protein_coding	MGI:2441992	NA	2	164.489	0.867248	0.371481	2.33457	0.0195658	0.116507	0.647723	1.43396	0.932691	2.2162	1.32835	1.93003
ENSMUSG00000060427.16	chr8:70063508-70078199	Zfp868	protein_coding	MGI:2142546	NA	2	245.886	0.365784	0.156723	2.33396	0.019598	0.116618	4.24345	4.02474	3.07736	5.49168	4.7382	4.31934
ENSMUSG00000034663.14	chr5:97145548-97239726	Bmp2k	protein_coding	MGI:2155456	NA	2	368.876	-0.338563	0.145067	-2.33384	0.0196044	0.116618	1.81462	1.52359	1.63957	1.33258	1.30828	1.28622
ENSMUSG00000031370.13	chrX:162718439-162741657	Zrsr2	protein_coding	MGI:103287	NA	2	471.394	-0.365584	0.156664	-2.33355	0.0196193	0.11662	3.12972	3.7794	2.50867	2.46003	2.42328	2.3919
ENSMUSG00000025980.15	chr1:55116994-55127402	Hspd1	protein_coding	MGI:96242	NA	2	5743.61	0.297402	0.127451	2.33345	0.0196244	0.11662	59.0457	64.9071	62.4484	70.4956	68.8823	93.3293
ENSMUSG00000026811.19	chr2:32489721-32510818	St6galnac6	protein_coding	MGI:1355316	NA	1	852.059	-0.33576	0.143966	-2.33221	0.0196895	0.116871	9.95415	8.11817	11.6287	7.42195	7.81366	8.21038
ENSMUSG00000039509.9	chr8:124623862-124676004	Nup133	protein_coding	MGI:2442620	NA	2	610.931	-0.361322	0.154927	-2.3322	0.01969	0.116871	3.25337	3.49201	5.35057	3.07565	3.18989	2.93857
ENSMUSG00000028917.15	chr4:141353045-141392210	Plekhm2	protein_coding	MGI:1916832	NA	2	1167.69	0.212459	0.0911029	2.33208	0.0196964	0.116871	8.95547	11.0045	7.58121	11.8048	12.3107	8.00828
ENSMUSG00000000631.21	chr11:77654072-77756806	Myo18a	protein_coding	MGI:2667185	NA	1	9332.18	-0.361709	0.155189	-2.33077	0.0197655	0.117222	34.8155	44.7893	30.9602	26.8774	25.8313	33.4532
ENSMUSG00000018736.15	chr11:68712260-68762684	Ndel1	protein_coding	MGI:1932915	NA	2	1914.11	-0.242445	0.104035	-2.33041	0.0197846	0.117276	23.1246	21.0756	19.8696	17.8472	17.7648	18.446
ENSMUSG00000031709.16	chr8:83891981-83999563	Tbc1d9	protein_coding	MGI:1918560	NA	2	63.3051	0.887492	0.381065	2.32898	0.0198602	0.117647	0.120906	0.215946	0.222126	0.38546	0.209519	0.446809
ENSMUSG00000033991.10	chr13:76246853-76338435	Ttc37	protein_coding	MGI:2679923	NA	2	537.63	-0.245969	0.105618	-2.32885	0.019867	0.117647	3.22442	2.99182	2.83043	2.47837	2.52651	2.60319
ENSMUSG00000004591.17	chr3:142496663-142587765	Pkn2	protein_coding	MGI:109211	NA	1	1454.85	-0.271883	0.116805	-2.32766	0.01993	0.117961	9.55501	9.87018	7.66408	7.37813	6.90584	8.17241
ENSMUSG00000022010.20	chr14:76652401-76745205	Tsc22d1	protein_coding	MGI:109127	NA	2	3530.65	-0.224903	0.0966349	-2.32735	0.0199468	0.118001	15.4146	13.7942	12.1236	11.348	10.3291	13.7832
ENSMUSG00000037151.9	chr10:61311580-61418570	Lrrc20	protein_coding	MGI:2387182	overlapping_locus	2	6360.69	-0.217966	0.0936818	-2.32666	0.0199832	0.118157	92.4646	70.88	70.9587	66.0994	65.0341	69.0286
ENSMUSG00000023460.15	chr17:66801507-66826724	Rab12	protein_coding	MGI:894284	NA	2	4094.94	-0.195052	0.0838403	-2.32647	0.0199933	0.118157	94.5842	58.638	61.3695	53.4849	54.1031	78.6835
ENSMUSG00000025409.15	chr10:127117825-127124887	Mbd6	protein_coding	MGI:106378	NA	2	639.588	0.306346	0.131725	2.32566	0.0200368	0.118304	4.7338	4.94096	4.86858	5.78991	6.10296	6.07539
[truncated: 9,804 more rows]

## Sheet: Significant padj<0.05
GeneID	Chr.Start.End	GeneName	GeneType	MGI_ID	Tag	Level	baseMean	log2FoldChange	lfcSE	stat	pvalue	padj	101_WT_CON	103_WT_CON	111_WT_CON	201_KO_CON	205_KO_CON	209_KO_CON
ENSMUSG00000038539.16	chr7:44461680-44466082	Atf5	protein_coding	MGI:2141857	NA	2	911.635	-7.08545	0.332941	-21.2814	1.68876e-100	1.99307e-96	26.2767	21.3471	18.1226	0.12326	0.143739	0.218285		Oranized based off od absolute log2FC of 1
ENSMUSG00000059201.13	chr6:29060219-29073876	Lep	protein_coding	MGI:104663	NA	2	99.0043	-5.85145	1.58045	-3.7024	0.000213567	0.00507147	0.421188	0.0389105	4.03481	0.0122072	0	0.129709		Corresponds to fold change of 2
ENSMUSG00000067786.17	chr2:157401998-157404442	Nnat	protein_coding	MGI:104716	NA	2	83.1879	-5.6838	1.41188	-4.0257	5.68062e-05	0.00191551	0.280681	0.0605033	9.79757	0	0	0.388971		padj p<0.05
ENSMUSG00000031722.11	chr8:110301760-110305804	Hp	protein_coding	MGI:96211	NA	2	172.257	-3.78143	0.970541	-3.8962	9.77118e-05	0.0029075	2.54461	0.243784	8.59953	0.0254937	0.0324319	5.43707
ENSMUSG00000041737.9	chr9:31337492-31375758	Tmem45b	protein_coding	MGI:2384574	NA	2	34.6415	-3.32719	1.03863	-3.20344	0.00135796	0.0186627	0.469324	0.0449632	2.33123	0.0423182	0	0.690544
ENSMUSG00000024972.17	chr19:7574025-7584558	Lgals12	protein_coding	MGI:1929094	NA	2	21.4095	-2.95584	1.00235	-2.94893	0.00318881	0.0340582	0.0727765	0.047063	1.13648	0	0.00939156	0.526686
ENSMUSG00000030546.15	chr7:79369966-79382651	Plin1	protein_coding	MGI:1890505	NA	2	178.134	-2.92537	1.0391	-2.81529	0.00487332	0.0457193	0.553467	0.0561436	4.73187	0.0352273	0.00560181	1.85819
ENSMUSG00000021456.9	chr13:62984691-63006236	Fbp2	protein_coding	MGI:95491	NA	2	1015.5	-2.25342	0.603888	-3.73151	0.000190333	0.00470115	29.7081	55.2288	44.6099	4.93322	21.6817	3.87109
ENSMUSG00000021815.5	chr14:20532935-20546969	Mss51	protein_coding	MGI:1922093	NA	2	7669.93	-1.97711	0.259169	-7.62865	2.3723e-14	1.99985e-11	251.212	134.365	245.854	43.9923	20.0527	139.274
ENSMUSG00000037411.11	chr5:137090358-137101113	Serpine1	protein_coding	MGI:97608	NA	2	388.679	-1.82435	0.456816	-3.99361	6.50737e-05	0.00213333	1.17292	2.21049	2.68846	0.557509	0.259477	1.33132
ENSMUSG00000052276.9	chr16:27126239-27169962	Ostn	protein_coding	MGI:2677164	NA	2	1088.56	-1.76717	0.260945	-6.77218	1.2686e-11	5.16276e-09	12.6929	25.2818	81.2261	4.4597	8.07089	16.9457
ENSMUSG00000059493.14	chrX:160616292-160942726	Nhs	protein_coding	MGI:2684894	NA	2	66.6148	-1.72916	0.496525	-3.48253	0.000496697	0.00917373	0.779275	0.148218	0.557931	0.134849	0.168591	0.112934
ENSMUSG00000000948.17	chr7:59626488-59630680	Gm38393	protein_coding	MGI:5613898	ncRNA_host	2	56.1341	-1.61475	0.538225	-3.00014	0.00269855	0.0303028	0.816499	0.756555	0.574649	0.24724	0.138392	0.36779
ENSMUSG00000085348.2	chr11:67102082-67128399	Myhas	lncRNA	MGI:3650429	NA	2	170.446	-1.59882	0.561302	-2.84841	0.0043938	0.0426445	19.6632	1.69544	1.87484	1.55531	2.02998	1.27241
ENSMUSG00000070498.4	chr5:125608838-125869647	Tmem132b	protein_coding	MGI:3609245	NA	2	78.0477	-1.48383	0.338935	-4.37791	1.19823e-05	0.000594181	2.15566	0.180044	0.0639372	0.0946945	0.0887643	0.139958
ENSMUSG00000086219.8	chr5:116576779-116603546	Srrm4os	lncRNA	MGI:1924048	NA	2	43.8346	-1.44411	0.359881	-4.01275	6.00159e-05	0.00199523	0.317484	0.595101	1.03975	0.246442	0.220883	0.187042
ENSMUSG00000031626.19	chr8:45960825-46280943	Sorbs2	protein_coding	MGI:1924574	NA	2	1976.87	-1.44011	0.135524	-10.6262	2.2502e-26	1.32784e-22	12.2158	5.08451	6.62173	2.40968	2.34915	3.72098
ENSMUSG00000074505.7	chr9:15821485-16412581	Fat3	protein_coding	MGI:2444314	NA	2	107.77	-1.43175	0.358482	-3.99393	6.49883e-05	0.00213333	0.294323	0.364515	0.136001	0.280104	0.16988	0.0115359
ENSMUSG00000028463.15	chr4:43506966-43513729	Car9	protein_coding	MGI:2447188	NA	2	56.1295	-1.36933	0.483593	-2.83157	0.00463196	0.0443002	0.28467	0.774122	2.70883	0.195474	0.474739	0.364154
ENSMUSG00000116924.2	chr17:15852025-15861366	4933401D09Rik	lncRNA	MGI:1918258	NA	2	41.0416	-1.34498	0.415651	-3.23583	0.00121288	0.017393	1.27145	1.5628	1.1928	0.592739	0.80991	0.283253
ENSMUSG00000027776.13	chr3:68597977-68605880	Il12a	protein_coding	MGI:96539	NA	2	65.6302	-1.28696	0.399601	-3.22063	0.0012791	0.01795	2.83564	1.23838	3.47306	0.806904	0.779383	1.58775
ENSMUSG00000041245.14	chrX:149981074-150103148	Wnk3	protein_coding	MGI:2652875	NA	2	45.7964	-1.26803	0.434594	-2.91772	0.00352598	0.0367287	0.295405	0.258818	0.131302	0.0850641	0.135268	0.0528228
ENSMUSG00000034472.14	chr8:75940572-75950741	Rasd2	protein_coding	MGI:1922391	NA	2	777.176	-1.24251	0.353083	-3.51905	0.000433098	0.00847823	8.65759	4.06803	17.9972	1.66298	2.46816	12.4259
ENSMUSG00000021203.16	chr12:103354941-103372609	Otub2	protein_coding	MGI:1915399	NA	1	535.989	-1.23986	0.222638	-5.56894	2.5629e-08	4.20101e-06	13.1869	10.9693	4.45582	4.13934	4.22818	2.99379
ENSMUSG00000015312.10	chr10:80765907-80768038	Gadd45b	protein_coding	MGI:107776	NA	2	668.004	-1.235	0.359932	-3.4312	0.000600927	0.0105853	23.6817	22.7339	8.71504	17.4873	10.6297	1.81192
ENSMUSG00000079428.9	chrX:135115528-135126849	Tceal7	protein_coding	MGI:1915746	NA	2	448.19	-1.22167	0.357781	-3.41458	0.000638813	0.0110767	15.4632	37.3537	13.5062	8.9489	8.92346	10.4177
ENSMUSG00000039372.6	chr1:72466271-72576089	Marchf4	protein_coding	MGI:2683550	NA	2	35.0535	-1.22091	0.381134	-3.20336	0.00135835	0.0186627	0.476488	0.630601	0.298585	0.25179	0.383235	0.0614255
ENSMUSG00000025019.18	chr19:41471076-41574975	Lcor	protein_coding	MGI:2443930	NA	2	295.245	-1.15025	0.339852	-3.38456	0.00071293	0.0119917	1.05529	1.19958	0.864092	0.3881	0.35091	0.769255
ENSMUSG00000066113.17	chr4:85432409-86346622	Adamtsl1	protein_coding	MGI:1924989	ncRNA_host	2	115.919	-1.14994	0.375698	-3.06081	0.00220736	0.0262614	0.682909	0.609859	0.543673	0.257303	0.231648	0.372545
ENSMUSG00000051817.9	chr2:152235531-152239983	Sox12	protein_coding	MGI:98360	NA	2	29.1514	-1.09878	0.390051	-2.81703	0.00484707	0.0456398	0.611818	0.302843	0.222029	0.183889	0.157906	0.146545
ENSMUSG00000068373.16	chr2:103973418-104241358	D430041D05Rik	protein_coding	MGI:2181743	ncRNA_host	2	313.856	-1.09782	0.19956	-5.50122	3.77176e-08	5.85715e-06	1.48469	0.701913	0.92346	0.346041	0.318156	0.92161
ENSMUSG00000021556.13	chr13:59782440-59823625	Golm1	protein_coding	MGI:1917329	NA	2	424.562	-1.07604	0.285063	-3.77473	0.000160179	0.00423865	6.66007	2.42879	6.00615	2.25815	2.21929	2.40926
ENSMUSG00000026380.11	chr1:118555675-118612898	Tfcp2l1	protein_coding	MGI:2444691	ncRNA_host	2	357.677	-1.07053	0.205789	-5.20206	1.97091e-07	2.47602e-05	2.65679	0.428658	1.27018	0.290652	0.209711	2.73935
ENSMUSG00000028289.13	chr4:28813131-28967499	Epha7	protein_coding	MGI:95276	NA	2	151.742	-1.06347	0.230383	-4.6161	3.91009e-06	0.000268296	1.21486	0.875848	0.343853	0.526077	0.58757	0.128901
ENSMUSG00000107585.2	chr7:3470181-3471961	3300002P13Rik	lncRNA	MGI:1917480	NA	2	311.38	-1.05745	0.189505	-5.58008	2.40414e-08	4.10699e-06	13.4447	12.7478	14.9108	6.03645	5.77139	8.02473
ENSMUSG00000055254.16	chr13:58954383-59281784	Ntrk2	protein_coding	MGI:97384	NA	2	92.5898	-1.04733	0.350939	-2.98436	0.00284174	0.0313441	0.141112	0.159526	0.514657	0.0967015	0.0744589	0.216318
ENSMUSG00000036745.16	chr3:146558122-146689764	Ttll7	protein_coding	MGI:1918142	NA	2	4528.81	-1.01619	0.121987	-8.33029	8.06431e-17	1.58625e-13	40.4316	21.0394	21.5068	10.0929	10.4608	20.8173
ENSMUSG00000046417.15	chr11:62495710-62539349	Lrrc75a	protein_coding	MGI:2682293	NA	2	93.094	-1.01284	0.221096	-4.581	4.62762e-06	0.000305113	2.22193	2.08243	1.76003	0.960365	0.984864	1.04127
ENSMUSG00000025610.8	chr16:87350218-87392224	Map3k7cl	protein_coding	MGI:2446584	NA	2	354.787	-0.969931	0.28101	-3.45159	0.000557302	0.0100047	8.70394	15.7207	6.56462	4.70893	7.39351	3.55513
ENSMUSG00000079022.11	chr15:71667644-71906076	Col22a1	protein_coding	MGI:1916950	NA	2	580.252	-0.955804	0.134892	-7.08571	1.38337e-12	7.77452e-10	2.34088	3.13868	3.49825	1.23234	1.53376	1.83347
ENSMUSG00000054640.16	chr17:81680534-82045806	Slc8a1	protein_coding	MGI:107956	NA	2	733.238	-0.946977	0.243043	-3.89634	9.76555e-05	0.0029075	2.28561	3.30075	0.865772	1.04932	1.12025	0.7964
ENSMUSG00000074519.12	chr2:177665077-177675815	Zfp971	protein_coding	MGI:1261426	NA	2	326.448	-0.944855	0.281356	-3.35822	0.000784461	0.0128397	8.93794	7.46326	5.21427	3.62664	2.67106	5.05594
ENSMUSG00000087366.8	chr4:94939771-95055555	Junos	lncRNA	MGI:2652837	ncRNA_host	2	463.821	-0.939137	0.315247	-2.97905	0.00289141	0.0316538	7.59787	6.10738	2.86678	4.35584	3.99783	0.958576
ENSMUSG00000050071.9	chrX:135114721-135116262	Bex1	protein_coding	MGI:1328321	NA	2	345.921	-0.93719	0.237914	-3.9392	8.17528e-05	0.00253907	16.4873	26.9752	18.3739	9.36108	10.2247	12.1643
ENSMUSG00000031099.17	chrX:46898245-46981851	Smarca1	protein_coding	MGI:1935127	NA	2	254.563	-0.918539	0.274285	-3.34885	0.000811469	0.0130476	2.81207	2.5811	1.57059	1.7132	1.2898	0.746641
ENSMUSG00000028789.17	chr4:128824026-128856232	Azin2	protein_coding	MGI:2442093	NA	1	71.2944	-0.909736	0.30261	-3.0063	0.00264446	0.0298673	1.4332	1.39219	0.777696	0.456393	0.72107	0.659257
ENSMUSG00000038670.12	chr7:44151123-44174080	Mybpc2	protein_coding	MGI:1336170	NA	2	150183	-0.907759	0.191191	-4.74791	2.05529e-06	0.000159582	1721.67	1523.67	2234.21	778.641	1021.46	1107.28
ENSMUSG00000040136.11	chr7:45753947-45829441	Abcc8	protein_coding	MGI:1352629	NA	2	90.9985	-0.892263	0.274247	-3.2535	0.00113994	0.0166093	0.472209	0.870198	0.975268	0.368178	0.387129	0.427709
ENSMUSG00000018909.16	chr7:99184673-99255978	Arrb1	protein_coding	MGI:99473	ncRNA_host	2	686.093	-0.886478	0.134271	-6.60217	4.05175e-11	1.59396e-08	4.08947	4.88714	4.44587	2.87006	2.6782	1.8337
ENSMUSG00000027559.6	chr3:14928598-14937583	Car3	protein_coding	MGI:88270	NA	2	73417.1	-0.885759	0.154491	-5.73341	9.84284e-09	2.0258e-06	2164.88	2130.53	1233.37	1097.34	1527.54	519.901
ENSMUSG00000030731.14	chr7:44033526-44049611	Syt3	protein_coding	MGI:99665	NA	2	158.326	-0.884375	0.283	-3.125	0.00177808	0.0224765	3.00966	1.93931	2.20974	1.69392	1.62872	0.797293
ENSMUSG00000013033.17	chr8:84626734-84668583	Adgrl1	protein_coding	MGI:1929461	NA	2	1281.56	-0.880622	0.156429	-5.62953	1.80705e-08	3.38162e-06	8.88353	8.00117	4.12632	3.96191	3.97537	3.01425
ENSMUSG00000044951.18	chr13:32884810-32967937	Mylk4	protein_coding	MGI:3643758	NA	2	39694.9	-0.867948	0.143947	-6.02963	1.64337e-09	4.61788e-07	317.518	173.603	217.819	114.463	94.9688	180.146
ENSMUSG00000019899.18	chr10:26857281-27492862	Lama2	protein_coding	MGI:99912	overlapping_locus	2	1333.87	-0.866772	0.211377	-4.10059	4.12094e-05	0.0015489	5.34519	6.97896	5.34821	2.96098	2.28446	5.04582
ENSMUSG00000028434.13	chr4:56991972-57143437	Epb41l4b	protein_coding	MGI:1859149	NA	2	115.658	-0.855747	0.250854	-3.41133	0.000646457	0.0111542	0.529698	0.206263	0.973153	0.143286	0.170522	0.813872
ENSMUSG00000038244.15	chr7:111825063-112012313	Mical2	protein_coding	MGI:2444947	NA	2	4472.88	-0.854117	0.282221	-3.02641	0.00247477	0.0285227	18.7514	11.8586	25.6837	8.48266	11.0195	11.315
ENSMUSG00000028132.16	chr3:120995410-121076747	Tlcd4	protein_coding	MGI:1923195	NA	2	1990.25	-0.851828	0.117449	-7.25276	4.08369e-13	2.67754e-10	12.6592	11.8234	12.4208	7.40434	6.93206	6.2076
ENSMUSG00000023571.5	chr4:156046775-156051086	C1qtnf12	protein_coding	MGI:1914639	NA	2	252.579	-0.851442	0.178428	-4.77191	1.82485e-06	0.00014552	9.04892	8.91693	6.53672	4.55587	5.07129	3.86725
ENSMUSG00000039633.8	chr8:36683218-36716670	Lonrf1	protein_coding	MGI:3609241	NA	2	306.445	-0.844369	0.26145	-3.22957	0.00123977	0.0175862	4.05673	3.59749	3.80509	1.58354	2.47837	2.23768
ENSMUSG00000005716.17	chr15:78075314-78090600	Pvalb	protein_coding	MGI:97821	NA	2	158892	-0.84239	0.188434	-4.47047	7.80472e-06	0.000424476	8428.98	6909.99	6119.87	3634.68	4263.89	3965.98
ENSMUSG00000030701.18	chr7:100292099-100311621	Plekhb1	protein_coding	MGI:1351469	NA	2	1114.86	-0.839903	0.183945	-4.56605	4.9701e-06	0.000322292	11.514	9.79545	19.9312	5.07397	7.44183	10.1175
ENSMUSG00000057003.13	chr11:67128855-67151272	Myh4	protein_coding	MGI:1339713	NA	2	1.53919e+06	-0.834748	0.214123	-3.89845	9.68113e-05	0.00289992	10692	10475.4	11351.5	4497.81	6720.2	7195.24
ENSMUSG00000030451.17	chr7:55699944-55881548	Herc2	protein_coding	MGI:103234	NA	2	4840.48	-0.834214	0.121385	-6.87244	6.31123e-12	2.86481e-09	13.8522	12.3977	15.5878	7.93179	7.80201	7.70647
ENSMUSG00000058966.14	chr7:126396840-126429391	Tlcd3b	protein_coding	MGI:1916202	NA	2	2305.62	-0.831853	0.203007	-4.09767	4.17336e-05	0.00155682	26.0788	36.5925	20.234	20.0188	20.3445	8.43394
ENSMUSG00000034127.16	chr10:115652737-115685798	Tspan8	protein_coding	MGI:2384918	NA	2	1353.2	-0.821002	0.207307	-3.96032	7.48504e-05	0.00236832	31.0658	34.8373	44.8928	20.4714	20.213	21.7631
ENSMUSG00000040128.10	chr4:33245423-33290163	Pnrc1	protein_coding	MGI:1917838	NA	2	4312.9	-0.814721	0.205433	-3.96588	7.31245e-05	0.00231993	86.9851	60.7365	96.0527	32.7934	56.8964	47.9541
ENSMUSG00000025170.14	chr11:121246951-121279077	Rab40b	protein_coding	MGI:2183451	ncRNA_host	2	398.117	-0.8127	0.151303	-5.37136	7.81459e-08	1.12473e-05	14.3719	8.29742	6.78559	5.13825	5.31751	5.54017
ENSMUSG00000024065.9	chr17:74111836-74139089	Ehd3	protein_coding	MGI:1928900	NA	2	97.5627	-0.806681	0.223902	-3.60283	0.000314773	0.00683508	1.06172	1.35535	1.7648	0.660189	0.669042	1.06158
ENSMUSG00000037341.15	chrX:19971993-20158046	Slc9a7	protein_coding	MGI:2444530	NA	2	112.912	-0.799923	0.22874	-3.49709	0.000470365	0.00889622	1.49842	1.57094	1.77268	0.690903	0.826198	1.31094
ENSMUSG00000048546.9	chr15:81732473-81742723	Tob2	protein_coding	MGI:1888525	NA	2	4417.33	-0.798176	0.221711	-3.60007	0.000318136	0.00687662	11.9144	24.8464	21.579	10.7539	9.74429	12.2057
ENSMUSG00000042717.6	chr6:14713976-14755273	Ppp1r3a	protein_coding	MGI:2153588	NA	2	8828.68	-0.782539	0.140209	-5.58122	2.38832e-08	4.10699e-06	68.873	60.378	49.0089	33.301	38.5763	30.8425
ENSMUSG00000042595.8	chrX:135950343-135983252	Fam199x	protein_coding	MGI:2384304	NA	2	190.348	-0.779186	0.219373	-3.55187	0.000382505	0.00782379	1.00309	1.2528	0.882338	0.547616	0.574266	0.703941
ENSMUSG00000096606.3	chr7:99273289-99276310	Tpbgl	protein_coding	MGI:3646425	NA	2	1016.97	-0.774633	0.233977	-3.31073	0.000930534	0.0144123	14.2742	16.1657	17.0433	13.5618	10.6171	5.34703
ENSMUSG00000026603.14	chr1:189612689-189654560	Smyd2	protein_coding	MGI:1915889	NA	2	5852.34	-0.774625	0.154462	-5.015	5.30339e-07	5.31898e-05	199.923	149.262	102.756	88.4506	122.615	55.4763
ENSMUSG00000034055.17	chrX:101557581-101687852	Phka1	protein_coding	MGI:97576	NA	1	24309.3	-0.771164	0.167039	-4.61667	3.89952e-06	0.000268296	213.951	186.682	160.719	93.2226	123.185	110.341
ENSMUSG00000031010.18	chrX:12937737-13039567	Usp9x	protein_coding	MGI:894681	NA	2	3339.87	-0.763189	0.182666	-4.17806	2.94009e-05	0.0011924	12.2361	11.5698	12.2748	6.56673	5.19476	10.2535
ENSMUSG00000107451.2	chr6:90455448-90456668	Gm44421	lncRNA	MGI:5690813	NA	2	150.867	-0.756862	0.260629	-2.90399	0.00368446	0.037878	3.76017	2.67211	6.12368	2.58198	2.3462	2.2396
ENSMUSG00000028033.17	chr1:21468627-22032166	Kcnq5	protein_coding	MGI:1924937	overlapping_locus	2	876.487	-0.756098	0.249559	-3.02974	0.00244766	0.0283204	4.87753	6.631	5.02875	3.67624	3.65586	2.59263
[truncated: 1,224 more rows]

## Sheet: Gene Ontology (Upregulated)
Class	Description	Enrichment	pvalue	count
BP	regulation of the force of heart contraction	62.2	1.1e-06	5
BP	skeletal muscle contraction	49.4	3e-06	5
[truncated: 13 more rows]
